# Supplementary material for: Predictive Model of Psychological Factors Influencing University Students' Intentions and Behaviour Regarding Physical Exercise—Based on Machine Learning Algorithms
Source: Research Square preprint supplement (doi:10.21203/rs.3.rs-8043331/v1), 2025-12-03
Supplement: Supplementary file 1 [file c45e8797a25088a0f59ddeb8.xlsx]

## Sheet: Overall raw data
Note: Gender：1=Male 2=Female Family Type：1=Town 2=Rural School Type：1=undergraduate 2=Associate degree holder Weight/kg
gender	age	household_type	school_name	school_level	major	weight	exercise_amount	self_control	depression_raw_score	depression_standard_score	depression_level	anxiety_raw_score	anxiety_standard_score	anxiety_level	emotion_suppression	cognitive_reappraisal	emotion_regulation_strategy
1	18	2	Shizuishan Institude of Industry and Trade	1	Intelligent Electromechanical Technology	130	27	79	49	61	Mild depression	41	51	Mild anxiety	13	14	Cognitive Reappraisal
1	19	2	Shizuishan Institude of Industry and Trade	1	Intelligent Electromechanical Technology	78	8	27	53	66	Moderate depression	89	111	Severe anxiety	28	35	Cognitive Reappraisal
1	21	2	Shizuishan Institude of Industry and Trade	1	Intelligent Electromechanical Technology	65	5	58	52	65	Moderate depression	42	52	Mild anxiety	9	10	Cognitive Reappraisal
1	19	2	Shizuishan Institude of Industry and Trade	1	Intelligent Electromechanical Technology	120	27	65	52	65	Moderate depression	54	67	Moderate anxiety	10	13	Cognitive Reappraisal
2	19	2	Shizuishan Institude of Industry and Trade	1	Intelligent Electromechanical Technology	114	6	66	51	63	Moderate depression	73	91	Severe anxiety	13	18	Cognitive Reappraisal
1	20	2	Shizuishan Institude of Industry and Trade	1	Intelligent Electromechanical Technology	57	40	87	49	61	Mild depression	35	43	Normal	6	8	Cognitive Reappraisal
1	20	2	Shizuishan Institude of Industry and Trade	1	Intelligent Electromechanical Technology	65	24	67	50	62	Mild depression	46	57	Mild anxiety	12	10	Emotional suppression
1	19	1	Shizuishan Institude of Industry and Trade	1	Intelligent Electromechanical Technology	70	48	75	48	60	Mild depression	34	42	Normal	16	20	Cognitive Reappraisal
1	20	2	Shizuishan Institude of Industry and Trade	1	Intelligent Electromechanical Technology	64	40	77	48	60	Mild depression	69	86	Severe anxiety	13	19	Cognitive Reappraisal
1	19	1	Shizuishan Institude of Industry and Trade	1	Intelligent Electromechanical Technology	52	18	65	47	58	Mild depression	46	57	Mild anxiety	19	24	Cognitive Reappraisal
1	18	2	Shizuishan Institude of Industry and Trade	1	Intelligent Electromechanical Technology	55	6	64	52	65	Moderate depression	35	43	Normal	18	19	Cognitive Reappraisal
1	18	1	Shizuishan Institude of Industry and Trade	1	Intelligent Electromechanical Technology	74	4	57	42	52	Normal	41	51	Mild anxiety	16	19	Cognitive Reappraisal
1	19	2	Shizuishan Institude of Industry and Trade	1	Intelligent Electromechanical Technology	75	100	73	49	61	Mild depression	36	45	Normal	20	27	Cognitive Reappraisal
1	19	1	Shizuishan Institude of Industry and Trade	1	Intelligent Electromechanical Technology	80	4	64	39	48	Normal	43	53	Mild anxiety	24	17	Emotional suppression
1	19	2	Shizuishan Institude of Industry and Trade	1	Intelligent Electromechanical Technology	52	24	78	43	53	Normal	35	43	Normal	4	7	Cognitive Reappraisal
1	20	2	Shizuishan Institude of Industry and Trade	1	Intelligent Electromechanical Technology	118	16	55	52	65	Moderate depression	45	56	Mild anxiety	19	15	Emotional suppression
1	18	2	Shizuishan Institude of Industry and Trade	1	Intelligent Electromechanical Technology	65	60	53	46	57	Mild depression	45	56	Mild anxiety	10	13	Cognitive Reappraisal
1	20	2	Shizuishan Institude of Industry and Trade	1	Intelligent Electromechanical Technology	60	12	55	38	47	Normal	39	48	Normal	9	6	Emotional suppression
1	20	2	Shizuishan Institude of Industry and Trade	1	Intelligent Electromechanical Technology	54	8	63	40	50	Normal	40	50	Normal	6	12	Cognitive Reappraisal
1	20	2	Shizuishan Institude of Industry and Trade	1	Intelligent Electromechanical Technology	58	40	51	52	65	Moderate depression	41	51	Mild anxiety	4	5	Cognitive Reappraisal
1	18	1	Shizuishan Institude of Industry and Trade	1	Intelligent Electromechanical Technology	80	27	40	56	70	Moderate depression	52	65	Moderate anxiety	18	23	Cognitive Reappraisal
1	19	2	Shizuishan Institude of Industry and Trade	1	Intelligent Electromechanical Technology	47	48	57	42	52	Normal	46	57	Mild anxiety	20	24	Cognitive Reappraisal
1	19	1	Shizuishan Institude of Industry and Trade	1	Intelligent Electromechanical Technology	50	27	54	42	52	Normal	50	62	Moderate anxiety	18	21	Cognitive Reappraisal
1	19	2	Shizuishan Institude of Industry and Trade	1	Intelligent Electromechanical Technology	69	9	75	27	33	Normal	48	60	Moderate anxiety	21	25	Cognitive Reappraisal
1	20	2	Shizuishan Institude of Industry and Trade	1	Intelligent Electromechanical Technology	65	48	53	52	65	Moderate depression	47	58	Mild anxiety	22	27	Cognitive Reappraisal
1	20	2	Shizuishan Institude of Industry and Trade	1	Intelligent Electromechanical Technology	50	18	71	36	45	Normal	47	58	Mild anxiety	22	26	Cognitive Reappraisal
1	19	1	Shizuishan Institude of Industry and Trade	1	Mechatronics Technology	65	4	57	52	65	Moderate depression	53	66	Moderate anxiety	16	20	Cognitive Reappraisal
1	19	2	Shizuishan Institude of Industry and Trade	1	Mechatronics Technology	65	36	60	52	65	Moderate depression	53	66	Moderate anxiety	22	26	Cognitive Reappraisal
1	20	2	Shizuishan Institude of Industry and Trade	1	Mechatronics Technology	70	12	58	47	58	Mild depression	57	71	Severe anxiety	16	20	Cognitive Reappraisal
1	19	2	Shizuishan Institude of Industry and Trade	1	Mechatronics Technology	74	12	59	52	65	Moderate depression	53	66	Moderate anxiety	16	20	Cognitive Reappraisal
1	20	2	Shizuishan Institude of Industry and Trade	1	Mechatronics Technology	55	6	76	50	62	Mild depression	34	42	Normal	4	5	Cognitive Reappraisal
1	19	2	Shizuishan Institude of Industry and Trade	1	Mechatronics Technology	60	45	67	51	63	Moderate depression	34	42	Normal	4	5	Cognitive Reappraisal
1	20	2	Shizuishan Institude of Industry and Trade	1	Mechatronics Technology	90	12	54	46	57	Mild depression	59	73	Severe anxiety	12	15	Cognitive Reappraisal
1	19	2	Shizuishan Institude of Industry and Trade	1	Mechatronics Technology	66	18	56	48	60	Mild depression	58	72	Severe anxiety	12	14	Cognitive Reappraisal
1	19	2	Shizuishan Institude of Industry and Trade	1	Mechatronics Technology	75	45	91	32	40	Normal	57	71	Severe anxiety	22	28	Cognitive Reappraisal
1	19	2	Shizuishan Institude of Industry and Trade	1	Mechatronics Technology	98	20	55	49	61	Mild depression	40	50	Normal	18	23	Cognitive Reappraisal
1	20	1	Shizuishan Institude of Industry and Trade	1	Mechatronics Technology and Application	65	60	86	38	47	Normal	47	58	Mild anxiety	19	18	Emotional suppression
1	20	2	Shizuishan Institude of Industry and Trade	1	Mechatronics Technology	60	1	59	50	62	Mild depression	53	66	Moderate anxiety	12	15	Cognitive Reappraisal
1	20	2	Shizuishan Institude of Industry and Trade	1	Mechatronics Technology	120	8	79	51	63	Moderate depression	34	42	Normal	17	20	Cognitive Reappraisal
1	19	2	Shizuishan Institude of Industry and Trade	1	Mechatronics Technology	95	9	74	45	56	Mild depression	37	46	Normal	19	19	Cognitive Reappraisal
1	18	2	Shizuishan Institude of Industry and Trade	1	Mechatronics Technology and Application	95	45	64	47	58	Mild depression	52	65	Moderate anxiety	23	23	Cognitive Reappraisal
1	18	2	Shizuishan Institude of Industry and Trade	1	Mechatronics Technology	154	24	73	39	48	Normal	48	60	Moderate anxiety	20	26	Cognitive Reappraisal
1	19	2	Shizuishan Institude of Industry and Trade	1	Mechatronics Technology	55	10	69	41	51	Normal	44	55	Mild anxiety	6	25	Cognitive Reappraisal
1	18	1	Shizuishan Institude of Industry and Trade	1	Mechatronics Technology	60	27	70	47	58	Mild depression	42	52	Mild anxiety	24	30	Cognitive Reappraisal
1	22	2	Shizuishan Institude of Industry and Trade	1	Mechatronics Technology	62	36	67	49	61	Mild depression	35	43	Normal	5	6	Cognitive Reappraisal
1	19	2	Shizuishan Institude of Industry and Trade	1	Mechatronics Technology	145	15	62	48	60	Mild depression	50	62	Moderate anxiety	16	20	Cognitive Reappraisal
1	19	2	Shizuishan Institude of Industry and Trade	1	Mechatronics Technology	70	36	71	51	63	Moderate depression	47	58	Mild anxiety	9	12	Cognitive Reappraisal
1	21	2	Shizuishan Institude of Industry and Trade	1	Mechatronics Technology and Application	65	60	82	41	51	Normal	45	56	Mild anxiety	19	17	Emotional suppression
1	22	2	Shizuishan Institude of Industry and Trade	1	Mechatronics Technology	64	12	73	50	62	Mild depression	38	47	Normal	12	14	Cognitive Reappraisal
1	19	2	Shizuishan Institude of Industry and Trade	1	Mechatronics Technology	123	60	71	34	42	Normal	49	61	Moderate anxiety	18	21	Cognitive Reappraisal
1	20	1	Shizuishan Institude of Industry and Trade	1	Mechatronics Technology	56	30	75	36	45	Normal	52	65	Moderate anxiety	17	17	Cognitive Reappraisal
1	20	2	Shizuishan Institude of Industry and Trade	1	Mechatronics Technology	69	16	56	32	40	Normal	51	63	Moderate anxiety	16	17	Cognitive Reappraisal
1	21	2	Shizuishan Institude of Industry and Trade	1	Mechatronics Technology	56	60	60	39	48	Normal	40	50	Normal	19	18	Emotional suppression
1	21	2	Shizuishan Institude of Industry and Trade	1	Mechatronics Technology	126	9	71	37	46	Normal	46	57	Mild anxiety	16	20	Cognitive Reappraisal
1	21	2	Shizuishan Institude of Industry and Trade	1	Mechatronics Technology	150	12	67	57	71	Moderate depression	40	50	Normal	24	14	Emotional suppression
1	20	2	Shizuishan Institude of Industry and Trade	1	Electrical Engineering and Automation	60	4	54	47	58	Mild depression	47	58	Mild anxiety	22	28	Cognitive Reappraisal
2	19	2	Yanching Institude of Technology	1	New Media Photography	70	2	79	47	58	Mild depression	40	50	Normal	13	14	Cognitive Reappraisal
1	20	2	Yanching Institude of Technology	1	Photography	150	64	91	45	56	Mild depression	58	72	Severe anxiety	28	35	Cognitive Reappraisal
2	19	1	Yanching Institude of Technology	1	New Media Photography	56	6	49	53	66	Moderate depression	39	48	Normal	14	19	Cognitive Reappraisal
2	19	2	Yanching Institude of Technology	1	New Media Photography	60	8	56	49	61	Mild depression	34	42	Normal	16	20	Cognitive Reappraisal
1	18	1	Yanching Institude of Technology	1	Photography	70	75	51	52	65	Moderate depression	53	66	Moderate anxiety	15	16	Cognitive Reappraisal
2	18	1	Yanching Institude of Technology	1	Photography	60	2	61	51	63	Moderate depression	65	81	Severe anxiety	16	20	Cognitive Reappraisal
2	18	2	Yanching Institude of Technology	1	Photography	60	30	75	43	53	Normal	64	80	Severe anxiety	20	18	Emotional suppression
1	19	1	Yanching Institude of Technology	1	New Media Photography	125	12	53	45	56	Mild depression	51	63	Moderate anxiety	20	20	Cognitive Reappraisal
1	18	1	Yanching Institude of Technology	1	New Media Photography	65	36	72	51	63	Moderate depression	48	60	Moderate anxiety	24	30	Cognitive Reappraisal
1	17	1	Yanching Institude of Technology	1	Photography	65	8	54	50	62	Mild depression	47	58	Mild anxiety	17	14	Emotional suppression
1	20	1	Yanching Institude of Technology	1	New Media Photography	72	27	47	55	68	Moderate depression	50	62	Moderate anxiety	19	27	Cognitive Reappraisal
2	19	1	Yanching Institude of Technology	1	Photography	106	8	56	54	67	Moderate depression	52	65	Moderate anxiety	8	8	Cognitive Reappraisal
1	20	2	Yanching Institude of Technology	1	Photography	88	75	62	51	63	Moderate depression	34	42	Normal	4	5	Cognitive Reappraisal
2	19	2	Yanching Institude of Technology	1	New Media Photography	55	24	67	41	51	Normal	38	47	Normal	19	24	Cognitive Reappraisal
1	19	2	Yanching Institude of Technology	1	New Media Photography	50	50	66	49	61	Mild depression	57	71	Severe anxiety	10	13	Cognitive Reappraisal
1	18	2	Yanching Institude of Technology	1	New Media Photography	91	24	62	36	45	Normal	53	66	Moderate anxiety	25	22	Emotional suppression
1	19	2	Yanching Institude of Technology	1	New Media Photography	95	12	58	40	50	Normal	38	47	Normal	16	20	Cognitive Reappraisal
2	19	2	Yanching Institude of Technology	1	New Media Photography	73	40	63	42	52	Normal	46	57	Mild anxiety	17	22	Cognitive Reappraisal
1	20	2	Yanching Institude of Technology	1	New Media Photography	75	32	53	52	65	Moderate depression	53	66	Moderate anxiety	9	12	Cognitive Reappraisal
1	18	1	Yanching Institude of Technology	1	New Media Photography	98	18	58	48	60	Mild depression	43	53	Mild anxiety	4	5	Cognitive Reappraisal
2	19	2	Yanching Institude of Technology	1	New Media Photography	60	8	46	60	75	Major Depressive Disorder	54	67	Moderate anxiety	19	25	Cognitive Reappraisal
1	20	2	Yanching Institude of Technology	1	New Media Photography	86	12	57	45	56	Mild depression	49	61	Moderate anxiety	20	22	Cognitive Reappraisal
1	19	1	Yanching Institude of Technology	1	New Media Photography	70	75	64	36	45	Normal	51	63	Moderate anxiety	23	24	Cognitive Reappraisal
2	19	2	Yanching Institude of Technology	1	New Media Photography	65	48	67	37	46	Normal	52	65	Moderate anxiety	20	19	Emotional suppression
1	20	2	Yanching Institude of Technology	1	New Media Photography	66	45	57	59	73	Major Depressive Disorder	45	56	Mild anxiety	16	20	Cognitive Reappraisal
1	19	2	Yanching Institude of Technology	1	New Media Photography	63	16	87	32	40	Normal	49	61	Moderate anxiety	18	24	Cognitive Reappraisal
2	20	1	Yanching Institude of Technology	1	New Media Photography	63	24	63	44	55	Mild depression	35	43	Normal	4	5	Cognitive Reappraisal
1	18	2	Yanching Institude of Technology	1	New Media Photography	101	16	69	47	58	Mild depression	54	67	Moderate anxiety	9	12	Cognitive Reappraisal
2	18	2	Yanching Institude of Technology	1	New Media Photography	51	18	51	59	73	Major Depressive Disorder	51	63	Moderate anxiety	16	19	Cognitive Reappraisal
1	19	2	Yanching Institude of Technology	1	Photography	56	6	69	51	63	Moderate depression	53	66	Moderate anxiety	19	26	Cognitive Reappraisal
1	19	2	Yanching Institude of Technology	1	Photography	60	30	68	39	48	Normal	48	60	Moderate anxiety	17	14	Emotional suppression
2	19	2	Yanching Institude of Technology	1	New Media Photography	75	24	66	46	57	Mild depression	45	56	Mild anxiety	23	26	Cognitive Reappraisal
2	19	2	Yanching Institude of Technology	1	New Media Photography	40	6	58	44	55	Mild depression	56	70	Severe anxiety	18	18	Cognitive Reappraisal
2	19	2	Yanching Institude of Technology	1	New Media Photography	59	6	67	40	50	Normal	55	68	Moderate anxiety	22	15	Emotional suppression
1	20	1	Yanching Institude of Technology	1	New Media Photography	75	15	68	43	53	Normal	37	46	Normal	16	20	Cognitive Reappraisal
2	20	2	Yanching Institude of Technology	1	School of Communication	96	18	66	40	50	Normal	45	56	Mild anxiety	24	26	Cognitive Reappraisal
2	18	2	Yanching Institude of Technology	1	New Media Photography	80	6	47	57	71	Moderate depression	59	73	Severe anxiety	18	22	Cognitive Reappraisal
2	19	1	Yanching Institude of Technology	1	New Media Photography	70	60	65	47	58	Mild depression	39	48	Normal	16	20	Cognitive Reappraisal
1	18	1	Yanching Institude of Technology	1	Photography	65	75	63	49	61	Mild depression	62	77	Severe anxiety	14	15	Cognitive Reappraisal
1	19	2	Yanching Institude of Technology	1	Photography	80	16	36	51	63	Moderate depression	66	82	Severe anxiety	17	14	Emotional suppression
1	19	2	Yanching Institude of Technology	1	New Media Photography	56	30	69	45	56	Mild depression	45	56	Mild anxiety	20	22	Cognitive Reappraisal
1	19	1	Yanching Institude of Technology	1	New Media Photography	75	9	50	50	62	Mild depression	53	66	Moderate anxiety	23	28	Cognitive Reappraisal
1	20	1	WENZHOU MEDICAL UNIVERSITY	2	Clinical Pharmacy	92	6	57	52	65	Moderate depression	53	66	Moderate anxiety	16	20	Cognitive Reappraisal
2	20	2	WENZHOU MEDICAL UNIVERSITY	2	Chinese Pharmacy	63	6	57	49	61	Mild depression	54	67	Moderate anxiety	12	15	Cognitive Reappraisal
1	19	2	WENZHOU MEDICAL UNIVERSITY	2	Clinical Pharmacy	60	36	60	54	67	Moderate depression	33	41	Normal	10	14	Cognitive Reappraisal
1	19	1	WENZHOU MEDICAL UNIVERSITY	2	Chinese Pharmacy	56	12	50	42	52	Normal	45	56	Mild anxiety	17	20	Cognitive Reappraisal
1	19	2	WENZHOU MEDICAL UNIVERSITY	2	Clinical Pharmacy	54	24	59	47	58	Mild depression	41	51	Mild anxiety	17	18	Cognitive Reappraisal
1	20	2	WENZHOU MEDICAL UNIVERSITY	2	Pediatrics	58	12	75	39	48	Normal	47	58	Mild anxiety	15	14	Emotional suppression
2	20	1	WENZHOU MEDICAL UNIVERSITY	2	Nursing	43	6	59	57	71	Moderate depression	50	62	Moderate anxiety	16	17	Cognitive Reappraisal
2	21	2	WENZHOU MEDICAL UNIVERSITY	2	Nursing	53	8	63	38	47	Normal	49	61	Moderate anxiety	23	14	Emotional suppression
2	20	1	WENZHOU MEDICAL UNIVERSITY	2	Nursing	50	18	62	40	50	Normal	47	58	Mild anxiety	20	20	Cognitive Reappraisal
2	20	2	WENZHOU MEDICAL UNIVERSITY	2	Nursing	42	4	59	47	58	Mild depression	59	73	Severe anxiety	14	13	Emotional suppression
2	20	1	WENZHOU MEDICAL UNIVERSITY	2	Clinical Pharmacy	58	6	53	48	60	Mild depression	47	58	Mild anxiety	16	17	Cognitive Reappraisal
2	20	2	WENZHOU MEDICAL UNIVERSITY	2	Nursing	55	9	65	41	51	Normal	55	68	Moderate anxiety	20	18	Emotional suppression
2	19	2	HUNAN UNIVERSITY OF ARTS AND SCIENCE	2	Food Science and Engineering	50	40	37	51	63	Moderate depression	57	71	Severe anxiety	24	29	Cognitive Reappraisal
2	21	2	HUNAN UNIVERSITY OF ARTS AND SCIENCE	2	Food Science and Engineering	62	4	58	39	48	Normal	54	67	Moderate anxiety	21	29	Cognitive Reappraisal
2	20	2	HUNAN UNIVERSITY OF ARTS AND SCIENCE	2	Environmental Engineering	39	2	59	53	66	Moderate depression	71	88	Severe anxiety	18	18	Cognitive Reappraisal
2	19	1	HUNAN UNIVERSITY OF ARTS AND SCIENCE	2	Biological Sciences	55	12	53	51	63	Moderate depression	62	77	Severe anxiety	13	15	Cognitive Reappraisal
2	19	2	HUNAN UNIVERSITY OF ARTS AND SCIENCE	2	Food Science and Engineering	55	80	69	49	61	Mild depression	61	76	Severe anxiety	20	23	Cognitive Reappraisal
2	19	2	HUNAN UNIVERSITY OF ARTS AND SCIENCE	2	Mathematics and Applied Mathematics	48	3	69	69	86	Major Depressive Disorder	61	76	Severe anxiety	23	28	Cognitive Reappraisal
2	20	2	HUNAN UNIVERSITY OF ARTS AND SCIENCE	2	Physics	50	1	46	54	67	Moderate depression	54	67	Moderate anxiety	17	25	Cognitive Reappraisal
1	19	2	HUNAN UNIVERSITY OF ARTS AND SCIENCE	2	Network Engineering	83	24	46	54	67	Moderate depression	62	77	Severe anxiety	16	25	Cognitive Reappraisal
2	19	2	HUNAN UNIVERSITY OF ARTS AND SCIENCE	2	Telecommunications Engineering	39	2	76	49	61	Mild depression	49	61	Moderate anxiety	17	21	Cognitive Reappraisal
2	20	2	HUNAN UNIVERSITY OF ARTS AND SCIENCE	2	Network Engineering	80	16	57	50	62	Mild depression	57	71	Severe anxiety	20	22	Cognitive Reappraisal
2	19	2	HUNAN UNIVERSITY OF ARTS AND SCIENCE	2	Chemistry	52	6	58	30	37	Normal	48	60	Moderate anxiety	18	8	Emotional suppression
2	21	2	HUNAN UNIVERSITY OF ARTS AND SCIENCE	2	Telecommunications Engineering	60	12	65	31	38	Normal	58	72	Severe anxiety	14	21	Cognitive Reappraisal
2	19	2	HUNAN UNIVERSITY OF ARTS AND SCIENCE	2	School of Computer and Electrical Engineering	49	1	51	53	66	Moderate depression	47	58	Mild anxiety	11	10	Emotional suppression
2	20	2	HUNAN UNIVERSITY OF ARTS AND SCIENCE	2	Fine Arts	46	2	59	45	56	Mild depression	46	57	Mild anxiety	18	24	Cognitive Reappraisal
2	20	1	HUNAN UNIVERSITY OF ARTS AND SCIENCE	2	Fine Arts	50	8	66	44	55	Mild depression	52	65	Moderate anxiety	20	23	Cognitive Reappraisal
1	19	2	HUNAN UNIVERSITY OF ARTS AND SCIENCE	2	Computer Science and Technology	70	30	53	54	67	Moderate depression	46	57	Mild anxiety	17	21	Cognitive Reappraisal
2	20	1	HUNAN UNIVERSITY OF ARTS AND SCIENCE	2	Business English	47	48	60	41	51	Normal	52	65	Moderate anxiety	22	14	Emotional suppression
2	19	2	HUNAN UNIVERSITY OF ARTS AND SCIENCE	2	Network Engineering	55	4	60	38	47	Normal	47	58	Mild anxiety	20	18	Emotional suppression
1	18	2	HUNAN UNIVERSITY OF ARTS AND SCIENCE	2	Biological Sciences	70	60	55	43	53	Normal	52	65	Moderate anxiety	17	14	Emotional suppression
1	21	2	HUNAN UNIVERSITY OF ARTS AND SCIENCE	2	Network Engineering	65	32	67	46	57	Mild depression	43	53	Mild anxiety	19	24	Cognitive Reappraisal
2	20	2	HUNAN UNIVERSITY OF ARTS AND SCIENCE	2	Agricultural Science	60	9	62	36	45	Normal	56	70	Severe anxiety	25	18	Emotional suppression
2	20	1	HUNAN UNIVERSITY OF ARTS AND SCIENCE	2	Electrical Engineering and Automation	53	6	61	38	47	Normal	47	58	Mild anxiety	18	20	Cognitive Reappraisal
2	19	2	HUNAN UNIVERSITY OF ARTS AND SCIENCE	2	Telecommunications Engineering	42	9	52	53	66	Moderate depression	40	50	Normal	24	25	Cognitive Reappraisal
2	19	2	HUNAN UNIVERSITY OF ARTS AND SCIENCE	2	Geographical Science	50	4	62	53	66	Moderate depression	51	63	Moderate anxiety	24	17	Emotional suppression
2	20	1	HUNAN UNIVERSITY OF ARTS AND SCIENCE	2	Biological Sciences	55	6	57	48	60	Mild depression	39	48	Normal	17	15	Emotional suppression
2	20	1	HUNAN UNIVERSITY OF ARTS AND SCIENCE	2	Geographical Science	55	6	65	38	47	Normal	52	65	Moderate anxiety	22	23	Cognitive Reappraisal
2	19	2	HUNAN UNIVERSITY OF ARTS AND SCIENCE	2	Agricultural Science	50	18	59	41	51	Normal	58	72	Severe anxiety	14	15	Cognitive Reappraisal
2	20	2	HUNAN UNIVERSITY OF ARTS AND SCIENCE	2	Biological Sciences	60	18	48	49	61	Mild depression	54	67	Moderate anxiety	20	22	Cognitive Reappraisal
2	20	2	HUNAN UNIVERSITY OF ARTS AND SCIENCE	2	Physics	75	36	52	43	53	Normal	53	66	Moderate anxiety	18	22	Cognitive Reappraisal
2	18	2	HUNAN UNIVERSITY OF ARTS AND SCIENCE	2	Physics	60	36	51	39	48	Normal	53	66	Moderate anxiety	18	20	Cognitive Reappraisal
2	20	2	HUNAN UNIVERSITY OF ARTS AND SCIENCE	2	Biological Sciences	54.5	18	68	43	53	Normal	55	68	Moderate anxiety	24	22	Emotional suppression
2	18	1	HUNAN UNIVERSITY OF ARTS AND SCIENCE	2	Chemistry	56	36	63	38	47	Normal	50	62	Moderate anxiety	21	13	Emotional suppression
2	19	2	HUNAN UNIVERSITY OF ARTS AND SCIENCE	2	Chemistry	38	24	52	34	42	Normal	56	70	Severe anxiety	20	18	Emotional suppression
2	20	1	HUNAN UNIVERSITY OF ARTS AND SCIENCE	2	Electrical Engineering and Automation	45	12	69	34	42	Normal	53	66	Moderate anxiety	23	16	Emotional suppression
2	20	1	HUNAN UNIVERSITY OF ARTS AND SCIENCE	2	Agricultural Science	48	4	54	35	43	Normal	52	65	Moderate anxiety	24	14	Emotional suppression
2	18	1	HUNAN UNIVERSITY OF ARTS AND SCIENCE	2	Chemistry	56	1	46	46	57	Mild depression	65	81	Severe anxiety	26	17	Emotional suppression
2	19	2	HUNAN UNIVERSITY OF ARTS AND SCIENCE	2	Chemical and Materials Engineering	44	4	57	55	68	Moderate depression	64	80	Severe anxiety	11	15	Cognitive Reappraisal
2	20	1	HUNAN UNIVERSITY OF ARTS AND SCIENCE	2	Electrical Engineering and Automation	47	4	44	43	53	Normal	50	62	Moderate anxiety	17	18	Cognitive Reappraisal
2	21	2	HUNAN UNIVERSITY OF ARTS AND SCIENCE	2	Electrical Engineering and Automation	56	9	59	50	62	Mild depression	53	66	Moderate anxiety	15	18	Cognitive Reappraisal
2	17	2	HUNAN UNIVERSITY OF ARTS AND SCIENCE	2	Chemical and Materials Engineering	90	36	56	60	75	Major Depressive Disorder	34	42	Normal	13	17	Cognitive Reappraisal
2	21	1	Yanching Institude of Technology	2	Environmental Engineering	60	8	56	52	65	Moderate depression	53	66	Moderate anxiety	16	20	Cognitive Reappraisal
1	18	1	Yanching Institude of Technology	2	Environmental Engineering	55	18	58	50	62	Mild depression	54	67	Moderate anxiety	8	10	Cognitive Reappraisal
1	19	1	Yanching Institude of Technology	2	Environmental Engineering	100	16	45	49	61	Mild depression	39	48	Normal	11	17	Cognitive Reappraisal
1	19	1	Yanching Institude of Technology	2	Environmental Engineering	200	8	60	52	65	Moderate depression	52	65	Moderate anxiety	16	20	Cognitive Reappraisal
1	19	2	Yanching Institude of Technology	2	Environmental Engineering	60	80	48	52	65	Moderate depression	54	67	Moderate anxiety	8	10	Cognitive Reappraisal
2	19	2	Yanching Institude of Technology	2	Environmental Engineering	50	30	78	57	71	Moderate depression	60	75	Severe anxiety	12	18	Cognitive Reappraisal
2	19	1	Yanching Institude of Technology	2	Environmental Engineering	40	18	27	36	45	Normal	55	68	Moderate anxiety	16	5	Emotional suppression
2	19	2	Yanching Institude of Technology	2	Environmental Engineering	60	1	57	47	58	Mild depression	63	78	Severe anxiety	4	5	Cognitive Reappraisal
2	19	2	Yanching Institude of Technology	2	Environmental Engineering	50	30	75	50	62	Mild depression	66	82	Severe anxiety	12	15	Cognitive Reappraisal
1	20	1	Yanching Institude of Technology	2	Environmental Engineering	59	27	55	50	62	Mild depression	57	71	Severe anxiety	16	21	Cognitive Reappraisal
1	19	2	Yanching Institude of Technology	2	Environmental Engineering	80	60	50	48	60	Mild depression	40	50	Normal	14	17	Cognitive Reappraisal
2	20	1	Yanching Institude of Technology	2	Environmental Design	70	27	57	43	53	Normal	52	65	Moderate anxiety	21	15	Emotional suppression
2	19	2	Yanching Institude of Technology	2	Environmental Engineering	47	9	52	40	50	Normal	55	68	Moderate anxiety	20	22	Cognitive Reappraisal
2	18	2	Yanching Institude of Technology	2	Environmental Engineering	80	30	49	46	57	Mild depression	52	65	Moderate anxiety	20	24	Cognitive Reappraisal
1	19	1	Yanching Institude of Technology	2	Environmental Engineering	90	80	42	50	62	Mild depression	54	67	Moderate anxiety	14	16	Cognitive Reappraisal
2	20	2	Yanching Institude of Technology	2	Environmental Engineering	52	12	68	44	55	Mild depression	42	52	Mild anxiety	18	15	Emotional suppression
2	19	2	Yanching Institude of Technology	2	Environmental Engineering	53	30	65	44	55	Mild depression	46	57	Mild anxiety	20	23	Cognitive Reappraisal
1	20	1	Yanching Institude of Technology	2	Environmental Engineering	80	75	71	40	50	Normal	41	51	Mild anxiety	15	19	Cognitive Reappraisal
2	19	2	Yanching Institude of Technology	2	Environmental Engineering	50	1	46	48	60	Mild depression	48	60	Moderate anxiety	20	14	Emotional suppression
1	19	1	Yanching Institude of Technology	2	Environmental Engineering	92	45	59	47	58	Mild depression	56	70	Severe anxiety	15	20	Cognitive Reappraisal
2	18	2	Yanching Institude of Technology	2	Environmental Engineering	70	60	38	51	63	Moderate depression	58	72	Severe anxiety	17	17	Cognitive Reappraisal
2	18	2	Yanching Institude of Technology	2	Environmental Engineering	54	9	68	50	62	Mild depression	47	58	Mild anxiety	24	24	Cognitive Reappraisal
1	19	2	Yanching Institude of Technology	2	Environmental Engineering	64	9	53	36	45	Normal	54	67	Moderate anxiety	23	30	Cognitive Reappraisal
2	18	2	Yanching Institude of Technology	2	Environmental Engineering	59	30	60	34	42	Normal	41	51	Mild anxiety	10	14	Cognitive Reappraisal
2	19	1	Yanching Institude of Technology	2	Environmental Engineering	49	15	63	28	35	Normal	57	71	Severe anxiety	20	21	Cognitive Reappraisal
2	18	2	Yanching Institude of Technology	2	Environmental Engineering	45	60	36	57	71	Moderate depression	53	66	Moderate anxiety	17	11	Emotional suppression
1	19	1	Yanching Institude of Technology	2	Environmental Engineering	80	48	56	36	45	Normal	51	63	Moderate anxiety	14	20	Cognitive Reappraisal
2	18	2	Yanching Institude of Technology	2	Environmental Engineering	69	9	57	41	51	Normal	46	57	Mild anxiety	20	17	Emotional suppression
2	18	1	Yanching Institude of Technology	2	Environmental Engineering	47	15	80	28	35	Normal	53	66	Moderate anxiety	20	14	Emotional suppression
1	18	2	Yanching Institude of Technology	2	Environmental Engineering	70	24	66	46	57	Mild depression	55	68	Moderate anxiety	16	20	Cognitive Reappraisal
2	19	2	Yanching Institude of Technology	2	Environmental Engineering	55	6	47	36	45	Normal	57	71	Severe anxiety	16	20	Cognitive Reappraisal
1	19	1	Yanching Institude of Technology	2	Environmental Engineering	65	12	70	36	45	Normal	48	60	Moderate anxiety	19	21	Cognitive Reappraisal
1	19	1	Yanching Institude of Technology	2	Environmental Engineering	70.5	100	63	29	36	Normal	53	66	Moderate anxiety	20	15	Emotional suppression
1	21	2	Yanching Institude of Technology	2	Environmental Engineering	75	12	65	35	43	Normal	50	62	Moderate anxiety	22	22	Cognitive Reappraisal
2	19	1	Yanching Institude of Technology	2	Environmental Engineering	55	12	56	51	63	Moderate depression	58	72	Severe anxiety	22	13	Emotional suppression
2	18	2	Yanching Institude of Technology	2	Environmental Engineering	58	18	62	45	56	Mild depression	54	67	Moderate anxiety	18	20	Cognitive Reappraisal
1	18	2	Yanching Institude of Technology	2	Environmental Engineering	58	6	62	35	43	Normal	55	68	Moderate anxiety	22	22	Cognitive Reappraisal
1	20	2	Yanching Institude of Technology	2	Environmental Engineering	60	36	60	24	30	Normal	52	65	Moderate anxiety	19	10	Emotional suppression
1	20	2	Yanching Institude of Technology	2	Environmental Engineering	75	18	54	34	42	Normal	55	68	Moderate anxiety	21	26	Cognitive Reappraisal
1	20	2	Yanching Institude of Technology	2	Environmental Engineering	50	24	49	42	52	Normal	44	55	Mild anxiety	13	15	Cognitive Reappraisal
1	19	1	Yanching Institude of Technology	2	Environmental Engineering	100	24	72	35	43	Normal	47	58	Mild anxiety	21	20	Emotional suppression
1	19	1	Yanching Institude of Technology	2	Environmental Engineering	200	30	69	30	37	Normal	53	66	Moderate anxiety	16	20	Cognitive Reappraisal
2	19	2	Yanching Institude of Technology	2	Environmental Engineering	60	4	58	55	68	Moderate depression	63	78	Severe anxiety	22	18	Emotional suppression
1	19	1	Yanching Institude of Technology	2	Environmental Engineering	70	24	60	47	58	Mild depression	44	55	Mild anxiety	20	19	Emotional suppression
1	19	2	WENZHOU MEDICAL UNIVERSITY	2	Pediatrics	80	24	59	43	53	Normal	49	61	Moderate anxiety	16	19	Cognitive Reappraisal
2	19	2	HUNAN UNIVERSITY OF ARTS AND SCIENCE	2	Chemistry	44	12	52	48	60	Mild depression	53	66	Moderate anxiety	14	16	Cognitive Reappraisal
2	18	2	WENZHOU MEDICAL UNIVERSITY	2	Nursing	52	6	53	50	62	Mild depression	53	66	Moderate anxiety	14	19	Cognitive Reappraisal
1	19	2	WENZHOU MEDICAL UNIVERSITY	2	Nursing	63	60	57	49	61	Mild depression	52	65	Moderate anxiety	16	20	Cognitive Reappraisal
1	19	2	WENZHOU MEDICAL UNIVERSITY	2	Clinical Medicine	53	8	56	44	55	Mild depression	38	47	Normal	16	20	Cognitive Reappraisal
1	18	1	WENZHOU MEDICAL UNIVERSITY	2	Nursing	65	18	59	47	58	Mild depression	38	47	Normal	16	20	Cognitive Reappraisal
1	20	1	WENZHOU MEDICAL UNIVERSITY	2	Pediatrics	80	45	57	31	38	Normal	51	63	Moderate anxiety	16	20	Cognitive Reappraisal
1	18	2	WENZHOU MEDICAL UNIVERSITY	2	Nursing	65	36	60	27	33	Normal	50	62	Moderate anxiety	22	14	Emotional suppression
1	18	1	WENZHOU MEDICAL UNIVERSITY	2	Nursing	50	18	72	41	51	Normal	49	61	Moderate anxiety	17	13	Emotional suppression
2	18	2	WENZHOU MEDICAL UNIVERSITY	2	Nursing	56	12	44	45	56	Mild depression	42	52	Mild anxiety	17	19	Cognitive Reappraisal
1	20	2	WENZHOU MEDICAL UNIVERSITY	2	Clinical Medicine	55	10	57	39	48	Normal	47	58	Mild anxiety	19	12	Emotional suppression
1	20	2	WENZHOU MEDICAL UNIVERSITY	2	Pediatrics	60	30	81	29	36	Normal	51	63	Moderate anxiety	24	20	Emotional suppression
2	19	1	Yanching Institude of Technology	2	Environmental Engineering	46	10	38	53	66	Moderate depression	51	63	Moderate anxiety	15	8	Emotional suppression
1	18	1	WENZHOU MEDICAL UNIVERSITY	2	Health Inspection and Quarantine	58	18	71	43	53	Normal	46	57	Mild anxiety	20	19	Emotional suppression
2	18	2	WENZHOU MEDICAL UNIVERSITY	2	Clinical Medicine	67	18	54	42	52	Normal	46	57	Mild anxiety	23	16	Emotional suppression
1	20	2	WENZHOU MEDICAL UNIVERSITY	2	Nursing	60	30	55	50	62	Mild depression	56	70	Severe anxiety	16	18	Cognitive Reappraisal
1	18	2	WENZHOU MEDICAL UNIVERSITY	2	Nursing	51	16	66	37	46	Normal	55	68	Moderate anxiety	20	18	Emotional suppression
2	18	1	WENZHOU MEDICAL UNIVERSITY	2	Pediatrics	62	1	79	38	47	Normal	40	50	Normal	19	22	Cognitive Reappraisal
2	19	2	WENZHOU MEDICAL UNIVERSITY	2	Health Inspection and Quarantine	62	32	60	39	48	Normal	51	63	Moderate anxiety	20	13	Emotional suppression
2	19	1	WENZHOU MEDICAL UNIVERSITY	2	Nursing	54	30	51	40	50	Normal	50	62	Moderate anxiety	7	12	Cognitive Reappraisal
2	19	1	WENZHOU MEDICAL UNIVERSITY	2	Health Inspection and Quarantine	51	48	78	39	48	Normal	46	57	Mild anxiety	23	18	Emotional suppression
2	20	2	WENZHOU MEDICAL UNIVERSITY	2	Pediatrics	56	24	75	44	55	Mild depression	43	53	Mild anxiety	21	25	Cognitive Reappraisal
2	18	2	WENZHOU MEDICAL UNIVERSITY	2	Pediatrics	63	4	60	42	52	Normal	44	55	Mild anxiety	19	18	Emotional suppression
2	18	2	WENZHOU MEDICAL UNIVERSITY	2	Nursing	46	6	57	47	58	Mild depression	42	52	Mild anxiety	13	20	Cognitive Reappraisal
2	20	1	WENZHOU MEDICAL UNIVERSITY	2	Pediatrics	71	9	61	40	50	Normal	62	77	Severe anxiety	20	25	Cognitive Reappraisal
1	20	2	WENZHOU MEDICAL UNIVERSITY	2	Health Inspection and Quarantine	60	6	70	36	45	Normal	47	58	Mild anxiety	26	30	Cognitive Reappraisal
2	19	2	WENZHOU MEDICAL UNIVERSITY	2	Preventive Medicine	50	10	60	39	48	Normal	56	70	Severe anxiety	23	19	Emotional suppression
2	20	2	WENZHOU MEDICAL UNIVERSITY	2	Clinical Medicine	55	36	60	44	55	Mild depression	51	63	Moderate anxiety	17	24	Cognitive Reappraisal
1	20	2	WENZHOU MEDICAL UNIVERSITY	2	Ophthalmology and Optometry	55	36	66	38	47	Normal	48	60	Moderate anxiety	20	17	Emotional suppression
1	20	2	WENZHOU MEDICAL UNIVERSITY	2	Ophthalmology and Optometry	58	16	64	41	51	Normal	49	61	Moderate anxiety	14	13	Emotional suppression
1	21	2	WENZHOU MEDICAL UNIVERSITY	2	Ophthalmology and Optometry	87	9	58	47	58	Mild depression	46	57	Mild anxiety	19	16	Emotional suppression
2	19	1	WENZHOU MEDICAL UNIVERSITY	2	Preventive Medicine	50	3	61	48	60	Mild depression	59	73	Severe anxiety	23	22	Emotional suppression
1	20	1	WENZHOU MEDICAL UNIVERSITY	2	Ophthalmology and Optometry	87	18	61	52	65	Moderate depression	36	45	Normal	4	5	Cognitive Reappraisal
2	20	1	WENZHOU MEDICAL UNIVERSITY	2	Preventive Medicine	57	6	65	41	51	Normal	47	58	Mild anxiety	18	16	Emotional suppression
2	20	1	WENZHOU MEDICAL UNIVERSITY	2	Ophthalmology and Optometry	90	9	72	30	37	Normal	56	70	Severe anxiety	16	20	Cognitive Reappraisal
2	20	1	WENZHOU MEDICAL UNIVERSITY	2	Ophthalmology and Optometry	54	6	81	43	53	Normal	47	58	Mild anxiety	18	24	Cognitive Reappraisal
2	19	1	WENZHOU MEDICAL UNIVERSITY	2	Ophthalmology and Optometry	67	4	59	49	61	Mild depression	38	47	Normal	16	20	Cognitive Reappraisal
1	20	1	WENZHOU MEDICAL UNIVERSITY	2	Preventive Medicine	69	24	78	33	41	Normal	52	65	Moderate anxiety	24	18	Emotional suppression
2	19	1	WENZHOU MEDICAL UNIVERSITY	2	Ophthalmology and Optometry	56	2	51	53	66	Moderate depression	54	67	Moderate anxiety	20	25	Cognitive Reappraisal
2	24	1	NORTHEAST NORMAL UNIVERSITY	2	Physical Chemistry	48	4	54	46	57	Mild depression	67	83	Severe anxiety	13	19	Cognitive Reappraisal
2	28	1	NORTHEAST NORMAL UNIVERSITY	2	Physical Chemistry	50	12	57	32	40	Normal	57	71	Severe anxiety	18	8	Emotional suppression
2	19	1	WENZHOU MEDICAL UNIVERSITY	2	Ophthalmology and Optometry	62	12	60	45	56	Mild depression	50	62	Moderate anxiety	28	29	Cognitive Reappraisal
2	18	2	WENZHOU MEDICAL UNIVERSITY	2	Nursing	49	20	56	43	53	Normal	52	65	Moderate anxiety	22	21	Emotional suppression
1	21	2	WENZHOU MEDICAL UNIVERSITY	2	Preventive Medicine	60	30	62	28	35	Normal	57	71	Severe anxiety	25	23	Emotional suppression
1	27	2	NORTHEAST NORMAL UNIVERSITY	2	Physical Chemistry	65	32	72	33	41	Normal	50	62	Moderate anxiety	22	21	Emotional suppression
1	24	1	NORTHEAST NORMAL UNIVERSITY	2	Materials and Chemical Engineering	80	16	53	51	63	Moderate depression	61	76	Severe anxiety	18	16	Emotional suppression
1	19	1	Shizuishan Institude of Industry and Trade	1	Intelligent Electromechanical Technology	145	1	75	51	63	Moderate depression	34	42	Normal	4	5	Cognitive Reappraisal
1	18	1	Shizuishan Institude of Industry and Trade	1	Intelligent Electromechanical Technology	70	8	61	50	62	Mild depression	45	56	Mild anxiety	7	9	Cognitive Reappraisal
1	21	2	Shizuishan Institude of Industry and Trade	1	Intelligent Electromechanical Technology	170	15	50	57	71	Moderate depression	34	42	Normal	4	5	Cognitive Reappraisal
1	20	2	Shizuishan Institude of Industry and Trade	1	Intelligent Electromechanical Technology	65	48	78	39	48	Normal	44	55	Mild anxiety	12	15	Cognitive Reappraisal
1	20	2	Shizuishan Institude of Industry and Trade	1	Intelligent Electromechanical Technology	117	24	91	38	47	Normal	48	60	Moderate anxiety	20	13	Emotional suppression
1	18	1	Shizuishan Institude of Industry and Trade	1	Electromechanical	160	1	74	49	61	Mild depression	35	43	Normal	4	5	Cognitive Reappraisal
1	29	1	Shizuishan Institude of Industry and Trade	1	Intelligent Electromechanical Technology	70	12	60	47	58	Mild depression	45	56	Mild anxiety	7	9	Cognitive Reappraisal
1	19	1	Shizuishan Institude of Industry and Trade	1	Intelligent Electromechanical Technology	57	24	61	48	60	Mild depression	49	61	Moderate anxiety	10	16	Cognitive Reappraisal
1	20	2	Shizuishan Institude of Industry and Trade	1	Intelligent Electromechanical Technology	63	45	57	50	62	Mild depression	48	60	Moderate anxiety	17	22	Cognitive Reappraisal
1	19	1	Shizuishan Institude of Industry and Trade	1	Intelligent Electromechanical Technology	50	60	58	51	63	Moderate depression	55	68	Moderate anxiety	9	12	Cognitive Reappraisal
1	20	2	Shizuishan Institude of Industry and Trade	1	Intelligent Electromechanical Technology	138	36	52	52	65	Moderate depression	59	73	Severe anxiety	11	12	Cognitive Reappraisal
1	19	2	Shizuishan Institude of Industry and Trade	1	Intelligent Electromechanical Technology	60	48	77	29	36	Normal	46	57	Mild anxiety	25	28	Cognitive Reappraisal
1	22	2	Shizuishan Institude of Industry and Trade	1	Intelligent Electromechanical Technology	100	6	69	44	55	Mild depression	45	56	Mild anxiety	19	18	Emotional suppression
1	18	2	Shizuishan Institude of Industry and Trade	1	Intelligent Electromechanical Technology	138	24	44	49	61	Mild depression	49	61	Moderate anxiety	18	20	Cognitive Reappraisal
1	19	2	Shizuishan Institude of Industry and Trade	1	Intelligent Electromechanical Technology	64	64	54	49	61	Mild depression	39	48	Normal	8	13	Cognitive Reappraisal
1	19	2	Shizuishan Institude of Industry and Trade	1	Intelligent Electromechanical Technology	60	2	89	34	42	Normal	54	67	Moderate anxiety	20	25	Cognitive Reappraisal
1	19	2	Shizuishan Institude of Industry and Trade	1	Intelligent Electromechanical Technology	75	36	88	33	41	Normal	49	61	Moderate anxiety	24	23	Emotional suppression
1	19	1	Shizuishan Institude of Industry and Trade	1	Intelligent Electromechanical Technology	140	6	68	43	53	Normal	44	55	Mild anxiety	16	17	Cognitive Reappraisal
1	22	2	Shizuishan Institude of Industry and Trade	1	Intelligent Electromechanical Technology	170	8	63	39	48	Normal	49	61	Moderate anxiety	24	12	Emotional suppression
1	20	2	Shizuishan Institude of Industry and Trade	1	Intelligent Electromechanical Technology	60	48	64	46	57	Mild depression	44	55	Mild anxiety	18	23	Cognitive Reappraisal
2	20	2	WENZHOU MEDICAL UNIVERSITY	2	Preventive Medicine	50	12	55	42	52	Normal	50	62	Moderate anxiety	23	14	Emotional suppression
1	19	1	WENZHOU MEDICAL UNIVERSITY	2	Clinical Medicine	55	1	64	50	62	Mild depression	51	63	Moderate anxiety	19	26	Cognitive Reappraisal
1	18	2	WENZHOU MEDICAL UNIVERSITY	2	Clinical Medicine	55	50	61	48	60	Mild depression	40	50	Normal	16	19	Cognitive Reappraisal
1	18	2	WENZHOU MEDICAL UNIVERSITY	2	Clinical Medicine	65	1	75	51	63	Moderate depression	57	71	Severe anxiety	10	14	Cognitive Reappraisal
1	19	2	WENZHOU MEDICAL UNIVERSITY	2	New Medical Program in Clinical Medicine	67	60	63	53	66	Moderate depression	69	86	Severe anxiety	17	22	Cognitive Reappraisal
1	18	1	WENZHOU MEDICAL UNIVERSITY	2	Medical Laboratory Technology	55	48	65	35	43	Normal	53	66	Moderate anxiety	24	22	Emotional suppression
2	18	2	WENZHOU MEDICAL UNIVERSITY	2	Medical Laboratory Technology	88	36	80	33	41	Normal	55	68	Moderate anxiety	26	19	Emotional suppression
1	18	1	WENZHOU MEDICAL UNIVERSITY	2	Clinical Medicine	80	24	62	36	45	Normal	54	67	Moderate anxiety	23	16	Emotional suppression
1	19	2	WENZHOU MEDICAL UNIVERSITY	2	Clinical	57	60	53	42	52	Normal	57	71	Severe anxiety	20	16	Emotional suppression
1	20	1	WENZHOU MEDICAL UNIVERSITY	2	Clinical Medicine	54	30	71	45	56	Mild depression	45	56	Mild anxiety	17	21	Cognitive Reappraisal
1	20	2	WENZHOU MEDICAL UNIVERSITY	2	Medical Laboratory Technology	58	6	58	40	50	Normal	41	51	Mild anxiety	20	25	Cognitive Reappraisal
2	19	2	WENZHOU MEDICAL UNIVERSITY	2	Medical Laboratory Technology	58	18	53	35	43	Normal	51	63	Moderate anxiety	20	13	Emotional suppression
1	19	1	WENZHOU MEDICAL UNIVERSITY	2	Clinical Medicine	70	36	67	28	35	Normal	55	68	Moderate anxiety	20	10	Emotional suppression
1	19	1	WENZHOU MEDICAL UNIVERSITY	2	Medical Laboratory Technology	70	45	60	41	51	Normal	53	66	Moderate anxiety	25	31	Cognitive Reappraisal
1	19	2	WENZHOU MEDICAL UNIVERSITY	2	Medical Laboratory Technology	81	15	69	39	48	Normal	45	56	Mild anxiety	18	13	Emotional suppression
1	19	1	WENZHOU MEDICAL UNIVERSITY	2	Clinical Laboratory Physician	64	32	61	42	52	Normal	54	67	Moderate anxiety	16	20	Cognitive Reappraisal
1	19	2	WENZHOU MEDICAL UNIVERSITY	2	Medical Laboratory Technology	51	32	62	39	48	Normal	48	60	Moderate anxiety	24	22	Emotional suppression
1	19	2	WENZHOU MEDICAL UNIVERSITY	2	Clinical Medicine	60	48	87	28	35	Normal	48	60	Moderate anxiety	24	15	Emotional suppression
2	19	2	WENZHOU MEDICAL UNIVERSITY	2	Medical Laboratory Technology	62	6	61	39	48	Normal	41	51	Mild anxiety	19	17	Emotional suppression
1	20	2	WENZHOU MEDICAL UNIVERSITY	2	Medical Laboratory Technology	50	24	68	41	51	Normal	46	57	Mild anxiety	22	17	Emotional suppression
1	19	1	WENZHOU MEDICAL UNIVERSITY	2	Clinical Medicine	64	24	44	49	61	Mild depression	49	61	Moderate anxiety	20	23	Cognitive Reappraisal
1	19	1	WENZHOU MEDICAL UNIVERSITY	2	Clinical Medicine	71	36	52	38	47	Normal	56	70	Severe anxiety	22	14	Emotional suppression
1	18	2	WENZHOU MEDICAL UNIVERSITY	2	Clinical Laboratory Physician	65	30	58	43	53	Normal	50	62	Moderate anxiety	21	14	Emotional suppression
1	19	2	WENZHOU MEDICAL UNIVERSITY	2	Clinical Medicine	55	36	67	36	45	Normal	54	67	Moderate anxiety	17	17	Cognitive Reappraisal
2	18	1	WENZHOU MEDICAL UNIVERSITY	2	Clinical Medicine	56	64	52	47	58	Mild depression	47	58	Mild anxiety	22	22	Cognitive Reappraisal
1	19	1	WENZHOU MEDICAL UNIVERSITY	2	Clinical Laboratory Physician	58	30	73	37	46	Normal	52	65	Moderate anxiety	24	17	Emotional suppression
1	19	1	WENZHOU MEDICAL UNIVERSITY	2	Clinical Laboratory Physician	65	27	59	39	48	Normal	51	63	Moderate anxiety	21	21	Cognitive Reappraisal
1	18	1	WENZHOU MEDICAL UNIVERSITY	2	Clinical Laboratory Physician	80	9	70	32	40	Normal	64	80	Severe anxiety	23	21	Emotional suppression
1	20	1	WENZHOU MEDICAL UNIVERSITY	2	Clinical Medicine	55	45	36	54	67	Moderate depression	91	113	Severe anxiety	23	26	Cognitive Reappraisal
1	20	1	WENZHOU MEDICAL UNIVERSITY	2	Clinical Medicine	65	45	60	59	73	Major Depressive Disorder	54	67	Moderate anxiety	17	18	Cognitive Reappraisal
1	20	1	WENZHOU MEDICAL UNIVERSITY	2	Clinical Medicine	75	36	61	50	62	Mild depression	65	81	Severe anxiety	17	17	Cognitive Reappraisal
2	20	1	WENZHOU MEDICAL UNIVERSITY	2	Clinical Medicine	52	4	60	52	65	Moderate depression	53	66	Moderate anxiety	16	23	Cognitive Reappraisal
1	21	1	WENZHOU MEDICAL UNIVERSITY	2	Clinical Medicine	63	45	58	35	43	Normal	55	68	Moderate anxiety	16	20	Cognitive Reappraisal
1	20	2	WENZHOU MEDICAL UNIVERSITY	2	Clinical Medicine	65	80	64	42	52	Normal	48	60	Moderate anxiety	18	16	Emotional suppression
1	21	2	WENZHOU MEDICAL UNIVERSITY	2	Clinical Medicine	55	3	68	42	52	Normal	46	57	Mild anxiety	18	14	Emotional suppression
2	20	2	WENZHOU MEDICAL UNIVERSITY	2	Clinical Medicine	43	3	60	33	41	Normal	57	71	Severe anxiety	17	6	Emotional suppression
1	19	2	WENZHOU MEDICAL UNIVERSITY	2	Clinical Medicine	63	27	60	49	61	Mild depression	39	48	Normal	20	22	Cognitive Reappraisal
2	20	1	WENZHOU MEDICAL UNIVERSITY	2	Clinical Medicine	52	45	59	37	46	Normal	53	66	Moderate anxiety	21	20	Emotional suppression
2	20	1	WENZHOU MEDICAL UNIVERSITY	2	Clinical Medicine	63	48	75	36	45	Normal	54	67	Moderate anxiety	21	26	Cognitive Reappraisal
1	20	2	WENZHOU MEDICAL UNIVERSITY	2	Pediatrics	67	12	53	45	56	Mild depression	54	67	Moderate anxiety	23	25	Cognitive Reappraisal
1	19	1	WENZHOU MEDICAL UNIVERSITY	2	Clinical Medicine	52	36	61	39	48	Normal	59	73	Severe anxiety	25	12	Emotional suppression
1	20	1	WENZHOU MEDICAL UNIVERSITY	2	Clinical Medicine	65	10	65	34	42	Normal	54	67	Moderate anxiety	21	18	Emotional suppression
1	21	1	WENZHOU MEDICAL UNIVERSITY	2	Clinical Medicine	59	12	49	43	53	Normal	51	63	Moderate anxiety	26	13	Emotional suppression
1	19	1	WENZHOU MEDICAL UNIVERSITY	2	Clinical Medicine	72	15	58	32	40	Normal	49	61	Moderate anxiety	18	10	Emotional suppression
1	19	1	WENZHOU MEDICAL UNIVERSITY	2	Clinical Medicine	52	45	44	64	80	Major Depressive Disorder	63	78	Severe anxiety	24	27	Cognitive Reappraisal
1	20	2	WENZHOU MEDICAL UNIVERSITY	2	Clinical Medicine	51	3	63	36	45	Normal	48	60	Moderate anxiety	16	23	Cognitive Reappraisal
1	20	2	WENZHOU MEDICAL UNIVERSITY	2	Pediatrics	60	48	45	61	76	Major Depressive Disorder	52	65	Moderate anxiety	18	20	Cognitive Reappraisal
1	20	1	WENZHOU MEDICAL UNIVERSITY	2	Clinical Medicine	85	24	70	38	47	Normal	58	72	Severe anxiety	17	29	Cognitive Reappraisal
1	20	1	WENZHOU MEDICAL UNIVERSITY	2	Psychiatry	66	15	91	21	26	Normal	55	68	Moderate anxiety	22	7	Emotional suppression
1	20	2	WENZHOU MEDICAL UNIVERSITY	2	Pediatrics	60	36	69	34	42	Normal	47	58	Mild anxiety	24	15	Emotional suppression
1	20	2	WENZHOU MEDICAL UNIVERSITY	2	Radiation Medicine	63	36	64	37	46	Normal	54	67	Moderate anxiety	24	14	Emotional suppression
1	18	2	WENZHOU MEDICAL UNIVERSITY	2	Clinical Medicine	75	8	55	58	72	Moderate depression	56	70	Severe anxiety	18	22	Cognitive Reappraisal
1	20	2	WENZHOU MEDICAL UNIVERSITY	2	Clinical Medicine	60	45	52	43	53	Normal	56	70	Severe anxiety	14	17	Cognitive Reappraisal
1	19	2	WENZHOU MEDICAL UNIVERSITY	2	Clinical Medicine	60	36	52	32	40	Normal	49	61	Moderate anxiety	21	14	Emotional suppression
1	19	1	WENZHOU MEDICAL UNIVERSITY	2	Clinical Medicine	85	45	71	42	52	Normal	52	65	Moderate anxiety	25	21	Emotional suppression
1	19	1	WENZHOU MEDICAL UNIVERSITY	2	Radiation Medicine	71	6	67	39	48	Normal	52	65	Moderate anxiety	16	20	Cognitive Reappraisal
1	19	2	WENZHOU MEDICAL UNIVERSITY	2	Clinical Medicine	69	16	57	47	58	Mild depression	38	47	Normal	16	20	Cognitive Reappraisal
1	21	2	HUNAN UNIVERSITY OF ARTS AND SCIENCE	2	Software Engineering	80	24	56	52	65	Moderate depression	53	66	Moderate anxiety	12	15	Cognitive Reappraisal
2	19	2	HUNAN UNIVERSITY OF ARTS AND SCIENCE	2	Software Engineering	55	12	48	51	63	Moderate depression	64	80	Severe anxiety	17	20	Cognitive Reappraisal
1	20	2	HUNAN UNIVERSITY OF ARTS AND SCIENCE	2	Software Engineering	50	3	60	50	62	Mild depression	52	65	Moderate anxiety	20	25	Cognitive Reappraisal
1	21	2	HUNAN UNIVERSITY OF ARTS AND SCIENCE	2	Software Engineering	75	60	57	45	56	Mild depression	68	85	Severe anxiety	11	14	Cognitive Reappraisal
1	19	2	HUNAN UNIVERSITY OF ARTS AND SCIENCE	2	Software Engineering	54	6	59	54	67	Moderate depression	53	66	Moderate anxiety	12	14	Cognitive Reappraisal
1	20	2	HUNAN UNIVERSITY OF ARTS AND SCIENCE	2	Software Engineering	75	9	63	43	53	Normal	56	70	Severe anxiety	12	15	Cognitive Reappraisal
2	20	2	HUNAN UNIVERSITY OF ARTS AND SCIENCE	2	Software Engineering	53	18	69	50	62	Mild depression	48	60	Moderate anxiety	20	21	Cognitive Reappraisal
1	20	1	HUNAN UNIVERSITY OF ARTS AND SCIENCE	2	Software Engineering	65	48	61	47	58	Mild depression	55	68	Moderate anxiety	19	21	Cognitive Reappraisal
2	19	2	HUNAN UNIVERSITY OF ARTS AND SCIENCE	2	Software Engineering	41	60	61	43	53	Normal	55	68	Moderate anxiety	17	18	Cognitive Reappraisal
1	20	2	HUNAN UNIVERSITY OF ARTS AND SCIENCE	2	Software Engineering	80	36	47	47	58	Mild depression	44	55	Mild anxiety	21	21	Cognitive Reappraisal
1	19	2	HUNAN UNIVERSITY OF ARTS AND SCIENCE	2	Software Engineering	51	80	71	36	45	Normal	54	67	Moderate anxiety	21	19	Emotional suppression
1	20	2	HUNAN UNIVERSITY OF ARTS AND SCIENCE	2	Software Engineering	73	36	37	56	70	Moderate depression	62	77	Severe anxiety	20	24	Cognitive Reappraisal
1	20	2	HUNAN UNIVERSITY OF ARTS AND SCIENCE	2	Software Engineering	65	36	72	45	56	Mild depression	38	47	Normal	24	29	Cognitive Reappraisal
1	20	2	HUNAN UNIVERSITY OF ARTS AND SCIENCE	2	Software Engineering	60	30	65	33	41	Normal	53	66	Moderate anxiety	17	20	Cognitive Reappraisal
1	20	2	HUNAN UNIVERSITY OF ARTS AND SCIENCE	2	Software Engineering	68	10	64	44	55	Mild depression	55	68	Moderate anxiety	22	22	Cognitive Reappraisal
1	19	2	HUNAN UNIVERSITY OF ARTS AND SCIENCE	2	Software Engineering	60	60	52	42	52	Normal	57	71	Severe anxiety	21	20	Emotional suppression
2	18	2	HUNAN UNIVERSITY OF ARTS AND SCIENCE	2	Software Engineering	45	45	57	46	57	Mild depression	52	65	Moderate anxiety	17	20	Cognitive Reappraisal
1	21	2	HUNAN UNIVERSITY OF ARTS AND SCIENCE	2	Software Engineering	150	36	63	46	57	Mild depression	53	66	Moderate anxiety	16	21	Cognitive Reappraisal
1	20	2	HUNAN UNIVERSITY OF ARTS AND SCIENCE	2	Software Engineering	48	48	66	42	52	Normal	58	72	Severe anxiety	26	33	Cognitive Reappraisal
1	19	2	HUNAN UNIVERSITY OF ARTS AND SCIENCE	2	Software Engineering	70	1	62	42	52	Normal	37	46	Normal	20	24	Cognitive Reappraisal
1	29	1	HUNAN UNIVERSITY OF ARTS AND SCIENCE	2	Software Engineering	70	2	58	47	58	Mild depression	47	58	Mild anxiety	18	21	Cognitive Reappraisal
1	19	2	HUNAN UNIVERSITY OF ARTS AND SCIENCE	2	Software Engineering	58	60	54	44	55	Mild depression	54	67	Moderate anxiety	19	25	Cognitive Reappraisal
1	20	2	HUNAN UNIVERSITY OF ARTS AND SCIENCE	2	Software Engineering	70	80	55	46	57	Mild depression	47	58	Mild anxiety	12	22	Cognitive Reappraisal
1	21	2	HUNAN UNIVERSITY OF ARTS AND SCIENCE	2	Software Engineering	94	60	59	48	60	Mild depression	49	61	Moderate anxiety	26	18	Emotional suppression
1	21	2	HUNAN UNIVERSITY OF ARTS AND SCIENCE	2	Software Engineering	56	1	54	47	58	Mild depression	49	61	Moderate anxiety	18	27	Cognitive Reappraisal
1	20	2	HUNAN UNIVERSITY OF ARTS AND SCIENCE	2	Software Engineering	64	30	50	53	66	Moderate depression	56	70	Severe anxiety	17	14	Emotional suppression
1	20	2	HUNAN UNIVERSITY OF ARTS AND SCIENCE	2	Software Engineering	60	24	57	53	66	Moderate depression	48	60	Moderate anxiety	19	17	Emotional suppression
1	21	2	HUNAN UNIVERSITY OF ARTS AND SCIENCE	2	Software Engineering	70	64	66	48	60	Mild depression	42	52	Mild anxiety	14	13	Emotional suppression
1	19	2	HUNAN UNIVERSITY OF ARTS AND SCIENCE	2	Software Engineering	67	6	67	41	51	Normal	50	62	Moderate anxiety	20	21	Cognitive Reappraisal
1	20	2	HUNAN UNIVERSITY OF ARTS AND SCIENCE	2	Software Engineering	55	45	54	49	61	Mild depression	58	72	Severe anxiety	24	15	Emotional suppression
2	19	2	HUNAN UNIVERSITY OF ARTS AND SCIENCE	2	Software Engineering	37.5	9	45	50	62	Mild depression	53	66	Moderate anxiety	21	21	Cognitive Reappraisal
1	20	2	HUNAN UNIVERSITY OF ARTS AND SCIENCE	2	Software Engineering	85	12	51	43	53	Normal	53	66	Moderate anxiety	18	21	Cognitive Reappraisal
1	19	2	HUNAN UNIVERSITY OF ARTS AND SCIENCE	2	Software Engineering	60	30	62	44	55	Mild depression	48	60	Moderate anxiety	19	25	Cognitive Reappraisal
2	20	2	HUNAN UNIVERSITY OF ARTS AND SCIENCE	2	Software Engineering	55	30	72	41	51	Normal	42	52	Mild anxiety	24	21	Emotional suppression
2	20	2	HUNAN UNIVERSITY OF ARTS AND SCIENCE	2	Software Engineering	55	27	59	42	52	Normal	49	61	Moderate anxiety	23	19	Emotional suppression
2	20	2	HUNAN UNIVERSITY OF ARTS AND SCIENCE	2	Software Engineering	51	27	61	41	51	Normal	45	56	Mild anxiety	16	16	Cognitive Reappraisal
1	20	2	HUNAN UNIVERSITY OF ARTS AND SCIENCE	2	Software Engineering	55	4	61	47	58	Mild depression	46	57	Mild anxiety	22	21	Emotional suppression
1	19	1	HUNAN UNIVERSITY OF ARTS AND SCIENCE	2	Software Engineering	53	16	56	43	53	Normal	52	65	Moderate anxiety	15	23	Cognitive Reappraisal
1	20	2	HUNAN UNIVERSITY OF ARTS AND SCIENCE	2	Software Engineering	69.98	36	62	44	55	Mild depression	52	65	Moderate anxiety	19	23	Cognitive Reappraisal
1	21	2	Yanching Institude of Technology	1	Computer Science and Technology	65	2	73	52	65	Moderate depression	59	73	Severe anxiety	7	12	Cognitive Reappraisal
2	19	1	Yanching Institude of Technology	1	Computer Science and Technology	55	18	58	40	50	Normal	36	45	Normal	20	21	Cognitive Reappraisal
2	19	2	Yanching Institude of Technology	1	Computer Science and Technology	59	18	56	49	61	Mild depression	59	73	Severe anxiety	14	19	Cognitive Reappraisal
1	18	1	Yanching Institude of Technology	1	Information Management and Information Systems	90	12	64	52	65	Moderate depression	56	70	Severe anxiety	8	10	Cognitive Reappraisal
1	20	2	Yanching Institude of Technology	1	Computer Science and Technology	80	9	55	51	63	Moderate depression	34	42	Normal	16	20	Cognitive Reappraisal
2	19	2	Yanching Institude of Technology	1	Computer Science and Technology	60	18	48	62	77	Major Depressive Disorder	60	75	Severe anxiety	17	24	Cognitive Reappraisal
1	19	1	Yanching Institude of Technology	1	Computer Science and Technology	80	36	67	48	60	Mild depression	40	50	Normal	9	10	Cognitive Reappraisal
1	19	1	Yanching Institude of Technology	1	Computer Science and Technology	60	80	60	48	60	Mild depression	52	65	Moderate anxiety	16	19	Cognitive Reappraisal
2	19	2	Yanching Institude of Technology	1	Computer Science and Technology	47	2	60	43	53	Normal	49	61	Moderate anxiety	16	19	Cognitive Reappraisal
1	19	2	Yanching Institude of Technology	1	Computer Science and Technology	75	60	59	48	60	Mild depression	37	46	Normal	16	20	Cognitive Reappraisal
2	19	2	Yanching Institude of Technology	1	Computer Science and Technology	58	18	65	41	51	Normal	53	66	Moderate anxiety	20	19	Emotional suppression
1	20	1	Yanching Institude of Technology	1	Computer Science and Technology	70	16	66	34	42	Normal	48	60	Moderate anxiety	21	20	Emotional suppression
1	20	2	Yanching Institude of Technology	1	Computer Science and Technology	72	2	62	50	62	Mild depression	60	75	Severe anxiety	16	20	Cognitive Reappraisal
1	19	2	Yanching Institude of Technology	1	Computer Science and Technology	55	40	91	25	31	Normal	52	65	Moderate anxiety	16	20	Cognitive Reappraisal
1	20	2	Yanching Institude of Technology	1	Computer Science and Technology	56	1	52	49	61	Mild depression	49	61	Moderate anxiety	4	5	Cognitive Reappraisal
1	19	1	Yanching Institude of Technology	1	Computer Science and Technology	60	6	91	39	48	Normal	45	56	Mild anxiety	28	27	Emotional suppression
1	19	1	Yanching Institude of Technology	1	Computer Science and Technology	73	12	68	48	60	Mild depression	37	46	Normal	17	21	Cognitive Reappraisal
1	19	2	Yanching Institude of Technology	1	Computer Science and Technology	120	16	60	46	57	Mild depression	60	75	Severe anxiety	13	17	Cognitive Reappraisal
2	18	1	Yanching Institude of Technology	1	Computer Science and Technology	50	27	71	32	40	Normal	51	63	Moderate anxiety	21	20	Emotional suppression
1	18	2	Yanching Institude of Technology	1	Computer Science and Technology	58	3	73	28	35	Normal	53	66	Moderate anxiety	21	17	Emotional suppression
1	20	2	Yanching Institude of Technology	1	Computer Science and Technology	60	12	64	43	53	Normal	47	58	Mild anxiety	12	17	Cognitive Reappraisal
1	19	2	Yanching Institude of Technology	1	Computer Science and Technology	70	24	78	24	30	Normal	54	67	Moderate anxiety	26	17	Emotional suppression
2	19	2	Yanching Institude of Technology	1	Computer Science and Technology	50	8	51	45	56	Mild depression	59	73	Severe anxiety	16	20	Cognitive Reappraisal
1	19	2	Yanching Institude of Technology	1	Computer Science and Technology	75	36	60	50	62	Mild depression	54	67	Moderate anxiety	16	19	Cognitive Reappraisal
1	20	1	Yanching Institude of Technology	1	Computer Science and Technology	90	18	86	33	41	Normal	49	61	Moderate anxiety	20	22	Cognitive Reappraisal
1	21	2	Yanching Institude of Technology	1	Computer Science and Technology	68	24	74	28	35	Normal	59	73	Severe anxiety	24	17	Emotional suppression
1	18	2	Yanching Institude of Technology	1	Computer Science and Technology	62	80	80	39	48	Normal	48	60	Moderate anxiety	24	20	Emotional suppression
2	18	2	Yanching Institude of Technology	1	Computer Science and Technology	60	9	76	40	50	Normal	49	61	Moderate anxiety	19	20	Cognitive Reappraisal
1	19	2	Yanching Institude of Technology	1	Computer Science and Technology	75	12	61	39	48	Normal	54	67	Moderate anxiety	20	24	Cognitive Reappraisal
2	20	2	Yanching Institude of Technology	1	Computer Science and Technology	54	12	59	45	56	Mild depression	51	63	Moderate anxiety	22	21	Emotional suppression
1	19	1	Yanching Institude of Technology	1	Computer Science and Technology	70	36	57	48	60	Mild depression	59	73	Severe anxiety	20	22	Cognitive Reappraisal
2	19	1	Yanching Institude of Technology	1	Computer Science and Technology	73	9	63	42	52	Normal	50	62	Moderate anxiety	17	20	Cognitive Reappraisal
1	19	1	Yanching Institude of Technology	1	Computer Science and Technology	70	60	54	41	51	Normal	36	45	Normal	4	6	Cognitive Reappraisal
2	18	1	Yanching Institude of Technology	1	Computer Science and Technology	51	6	59	37	46	Normal	51	63	Moderate anxiety	15	12	Emotional suppression
2	18	2	Yanching Institude of Technology	1	Computer Science and Technology	58	24	78	39	48	Normal	54	67	Moderate anxiety	24	20	Emotional suppression
1	19	2	Yanching Institude of Technology	1	Computer Science and Technology	60	18	89	36	45	Normal	54	67	Moderate anxiety	26	15	Emotional suppression
1	19	2	Yanching Institude of Technology	1	Computer Science and Technology	78	9	53	49	61	Mild depression	54	67	Moderate anxiety	14	13	Emotional suppression
2	19	1	Yanching Institude of Technology	1	Computer Science and Technology	47.5	16	62	40	50	Normal	52	65	Moderate anxiety	19	18	Emotional suppression
1	19	2	Yanching Institude of Technology	1	Computer Science and Technology	63	18	52	48	60	Mild depression	43	53	Mild anxiety	16	20	Cognitive Reappraisal
1	19	2	Yanching Institude of Technology	1	Computer Science and Technology	70	100	59	38	47	Normal	52	65	Moderate anxiety	23	19	Emotional suppression
2	19	2	Yanching Institude of Technology	1	Computer Science and Technology	48	20	46	49	61	Mild depression	67	83	Severe anxiety	24	20	Emotional suppression
2	18	2	Yanching Institude of Technology	1	Computer Science and Technology	52	16	43	36	45	Normal	58	72	Severe anxiety	24	19	Emotional suppression
1	20	2	Yanching Institude of Technology	1	Computer Science and Technology	73	24	57	48	60	Mild depression	65	81	Severe anxiety	16	20	Cognitive Reappraisal
1	19	2	Guangdong Polytechnic Normal University	1	Measurement and Control Technology and Instrumentation	60	6	65	42	52	Normal	49	61	Moderate anxiety	19	22	Cognitive Reappraisal
2	19	1	Guangdong Polytechnic Normal University	1	Environmental Design	63	16	68	45	56	Mild depression	55	68	Moderate anxiety	19	20	Cognitive Reappraisal
1	19	2	Guangdong Polytechnic Normal University	1	Mechanical Design, Manufacturing, and Automation	71	60	67	35	43	Normal	54	67	Moderate anxiety	26	17	Emotional suppression
2	19	2	Guangdong Polytechnic Normal University	1	Japanese Language and Literature	65	64	52	42	52	Normal	57	71	Severe anxiety	21	14	Emotional suppression
1	20	2	Guangdong Polytechnic Normal University	1	Mechanical Design, Manufacturing, and Automation	62	80	58	49	61	Mild depression	50	62	Moderate anxiety	11	9	Emotional suppression
1	19	2	Guangdong Polytechnic Normal University	1	Taxation	60	24	57	41	51	Normal	47	58	Mild anxiety	17	20	Cognitive Reappraisal
1	18	2	Guangdong Polytechnic Normal University	1	Automotive Engineering	80	45	91	24	30	Normal	55	68	Moderate anxiety	28	35	Cognitive Reappraisal
2	18	2	Guangdong Polytechnic Normal University	1	Mathematics and Applied Mathematics	52	16	62	52	65	Moderate depression	54	67	Moderate anxiety	16	19	Cognitive Reappraisal
2	18	1	Guangdong Polytechnic Normal University	1	Business English	55	32	65	35	43	Normal	52	65	Moderate anxiety	21	15	Emotional suppression
1	19	2	Guangdong Polytechnic Normal University	1	Internet of Things Engineering	95	8	32	66	82	Major Depressive Disorder	48	60	Moderate anxiety	15	21	Cognitive Reappraisal
2	20	2	Guangdong Polytechnic Normal University	1	Taxation	43	60	59	42	52	Normal	53	66	Moderate anxiety	22	14	Emotional suppression
1	19	2	Guangdong Polytechnic Normal University	1	Financial Management	66	18	65	41	51	Normal	50	62	Moderate anxiety	18	25	Cognitive Reappraisal
1	19	2	Guangdong Polytechnic Normal University	1	Software Engineering	70	24	53	56	70	Moderate depression	53	66	Moderate anxiety	19	15	Emotional suppression
2	18	2	Guangdong Polytechnic Normal University	1	Finance	46	40	47	60	75	Major Depressive Disorder	67	83	Severe anxiety	21	14	Emotional suppression
2	19	2	Guangdong Polytechnic Normal University	1	Environmental Design	51	24	57	51	63	Moderate depression	45	56	Mild anxiety	18	15	Emotional suppression
1	21	2	JIAYING UNIVERSITY	1	Business Administration	73	18	48	46	57	Mild depression	52	65	Moderate anxiety	23	22	Emotional suppression
1	19	1	JIAYING UNIVERSITY	1	Food Science and Engineering	45	6	55	26	32	Normal	55	68	Moderate anxiety	26	21	Emotional suppression
2	19	2	Guangdong Polytechnic Normal University	1	Journalism and Communication Studies	51	60	50	44	55	Mild depression	56	70	Severe anxiety	21	18	Emotional suppression
2	19	1	JIAYING UNIVERSITY	1	Business Administration	45	27	64	43	53	Normal	46	57	Mild anxiety	20	19	Emotional suppression
2	18	2	Guangdong Polytechnic Normal University	1	Accounting	51	8	67	33	41	Normal	52	65	Moderate anxiety	20	17	Emotional suppression
2	20	1	Guangdong Polytechnic Normal University	1	Business English	55	2	44	55	68	Moderate depression	55	68	Moderate anxiety	14	23	Cognitive Reappraisal
2	19	2	JIAYING UNIVERSITY	1	Primary Education	52	12	72	38	47	Normal	50	62	Moderate anxiety	24	14	Emotional suppression
1	19	2	Guangdong Polytechnic Normal University	1	Mechanical Design, Manufacturing, and Automation	56	48	55	41	51	Normal	59	73	Severe anxiety	26	32	Cognitive Reappraisal
1	21	2	Guangdong Polytechnic Normal University	1	Financial Accounting Education	65	60	40	48	60	Mild depression	68	85	Severe anxiety	22	27	Cognitive Reappraisal
2	19	1	JIAYING UNIVERSITY	1	Musicology	58	3	69	34	42	Normal	54	67	Moderate anxiety	21	22	Cognitive Reappraisal
1	20	2	Guangdong Polytechnic Normal University	1	Financial Management	80	27	56	51	63	Moderate depression	57	71	Severe anxiety	17	18	Cognitive Reappraisal
2	19	2	Guangdong Polytechnic Normal University	1	Finance	50	27	64	32	40	Normal	47	58	Mild anxiety	22	22	Cognitive Reappraisal
1	19	2	Guangdong Polytechnic Normal University	1	Finance	63	80	66	45	56	Mild depression	48	60	Moderate anxiety	18	23	Cognitive Reappraisal
2	19	2	Guangdong Polytechnic Normal University	1	Software Engineering	52	36	44	41	51	Normal	59	73	Severe anxiety	22	17	Emotional suppression
1	18	1	Guangdong Polytechnic Normal University	1	Mechanical Design, Manufacturing, and Automation	52	60	60	41	51	Normal	53	66	Moderate anxiety	21	22	Cognitive Reappraisal
2	19	2	Guangdong Polytechnic Normal University	1	Law and Intellectual Property	48	10	54	55	68	Moderate depression	63	78	Severe anxiety	20	21	Cognitive Reappraisal
2	18	2	Guangdong Polytechnic Normal University	1	Data Structures and Big Data Technologies	49	25	65	46	57	Mild depression	44	55	Mild anxiety	20	20	Cognitive Reappraisal
2	19	2	JIAYING UNIVERSITY	1	Musicology	46	18	50	60	75	Major Depressive Disorder	57	71	Severe anxiety	21	15	Emotional suppression
2	18	2	Guangdong Polytechnic Normal University	1	Journalism and Communication Studies	46	48	55	33	41	Normal	51	63	Moderate anxiety	24	15	Emotional suppression
1	18	1	Guangdong Polytechnic Normal University	1	Electrical Engineering and Automation	52	45	59	44	55	Mild depression	46	57	Mild anxiety	20	20	Cognitive Reappraisal
2	19	2	Guangdong Polytechnic Normal University	1	Mechanical Design, Manufacturing, and Automation	51	60	56	40	50	Normal	40	50	Normal	19	17	Emotional suppression
1	20	2	JIAYING UNIVERSITY	1	Electronic and Information Engineering	55	48	67	42	52	Normal	39	48	Normal	16	20	Cognitive Reappraisal
2	20	2	JIAYING UNIVERSITY	1	Biological Sciences	47	12	63	37	46	Normal	51	63	Moderate anxiety	21	20	Emotional suppression
2	20	2	Guangdong Polytechnic Normal University	1	Tourism Management and Service Education	42	24	70	38	47	Normal	51	63	Moderate anxiety	15	16	Cognitive Reappraisal
2	19	2	Guangdong Polytechnic Normal University	1	Musicology	50	20	65	34	42	Normal	54	67	Moderate anxiety	21	18	Emotional suppression
2	19	2	Guangdong Polytechnic Normal University	1	Business English	38	18	58	45	56	Mild depression	56	70	Severe anxiety	21	19	Emotional suppression
1	19	2	Guangdong Polytechnic Normal University	1	Finance	55	20	65	55	68	Moderate depression	59	73	Severe anxiety	17	14	Emotional suppression
2	20	2	Guangdong Polytechnic Normal University	1	Japanese Language and Literature	53	4	54	48	60	Mild depression	54	67	Moderate anxiety	20	25	Cognitive Reappraisal
2	19	2	Guangdong Polytechnic Normal University	1	English Language and Literature	45	2	63	41	51	Normal	55	68	Moderate anxiety	23	17	Emotional suppression
2	20	2	Guangdong Polytechnic Normal University	1	Business Administration	105	27	59	56	70	Moderate depression	48	60	Moderate anxiety	19	29	Cognitive Reappraisal
2	18	1	JIAYING UNIVERSITY	1	Musicology	47	36	59	48	60	Mild depression	63	78	Severe anxiety	16	19	Cognitive Reappraisal
1	19	2	Guangdong Polytechnic Normal University	1	Artificial Intelligence	67	12	44	47	58	Mild depression	51	63	Moderate anxiety	16	17	Cognitive Reappraisal
1	20	1	Guangdong Polytechnic Normal University	1	Automotive Engineering	75	18	62	46	57	Mild depression	50	62	Moderate anxiety	18	20	Cognitive Reappraisal
1	19	2	Guangdong Polytechnic Normal University	1	Tourism Management and Service Education	45	60	58	44	55	Mild depression	42	52	Mild anxiety	16	20	Cognitive Reappraisal
2	19	2	Guangdong Polytechnic Normal University	1	Administrative Management	60	80	52	39	48	Normal	57	71	Severe anxiety	27	23	Emotional suppression
2	18	1	Guangdong Polytechnic Normal University	1	Musicology	68	10	50	51	63	Moderate depression	56	70	Severe anxiety	16	14	Emotional suppression
2	18	2	Guangdong Polytechnic Normal University	1	History	65	24	66	34	42	Normal	52	65	Moderate anxiety	25	13	Emotional suppression
2	20	2	Guangdong Polytechnic Normal University	1	Financial Management	55	50	60	41	51	Normal	48	60	Moderate anxiety	20	12	Emotional suppression
1	18	2	Guangdong Polytechnic Normal University	1	Vehicle Engineering	54	45	37	53	66	Moderate depression	85	106	Severe anxiety	27	27	Cognitive Reappraisal
2	20	2	JIAYING UNIVERSITY	1	Horticulture	39	36	63	45	56	Mild depression	38	47	Normal	19	19	Cognitive Reappraisal
2	19	2	Guangdong Polytechnic Normal University	1	Primary Education	47	45	53	38	47	Normal	51	63	Moderate anxiety	27	16	Emotional suppression
1	18	1	Guangdong Polytechnic Normal University	1	Building Electricity and Intelligence	50	30	66	42	52	Normal	55	68	Moderate anxiety	23	23	Cognitive Reappraisal
1	21	2	Guangdong Polytechnic Normal University	1	Business English	61	18	64	44	55	Mild depression	39	48	Normal	18	21	Cognitive Reappraisal
1	20	1	Guangdong Polytechnic Normal University	1	Mechanical Design, Manufacturing, and Automation	52	8	59	46	57	Mild depression	59	73	Severe anxiety	18	13	Emotional suppression
2	19	2	JIAYING UNIVERSITY	1	Biological Sciences	46	12	61	51	63	Moderate depression	51	63	Moderate anxiety	22	23	Cognitive Reappraisal
2	20	2	JIAYING UNIVERSITY	1	Biological Sciences	40	12	69	52	65	Moderate depression	35	43	Normal	15	19	Cognitive Reappraisal
1	18	2	Guangdong Polytechnic Normal University	1	Finance	60	45	58	52	65	Moderate depression	32	40	Normal	13	14	Cognitive Reappraisal
2	20	2	Guangdong Polytechnic Normal University	1	Accounting	52	18	66	48	60	Mild depression	55	68	Moderate anxiety	17	20	Cognitive Reappraisal
1	18	2	Guangdong Polytechnic Normal University	1	Vehicle Engineering	70	100	69	35	43	Normal	47	58	Mild anxiety	10	13	Cognitive Reappraisal
2	19	2	Guangdong Polytechnic Normal University	1	Law	52	4	58	45	56	Mild depression	46	57	Mild anxiety	22	19	Emotional suppression
2	19	2	JIAYING UNIVERSITY	1	Biological Sciences	50	3	60	37	46	Normal	49	61	Moderate anxiety	18	12	Emotional suppression
1	18	2	JIAYING UNIVERSITY	1	Software Engineering	55	9	25	56	70	Moderate depression	53	66	Moderate anxiety	13	18	Cognitive Reappraisal
2	20	1	Guangdong Polytechnic Normal University	1	Law and Intellectual Property	47	9	57	48	60	Mild depression	46	57	Mild anxiety	23	18	Emotional suppression
2	19	1	Guangdong Polytechnic Normal University	1	History	42	24	54	46	57	Mild depression	49	61	Moderate anxiety	17	13	Emotional suppression
1	18	1	Guangdong Polytechnic Normal University	1	Business English	55	12	65	38	47	Normal	50	62	Moderate anxiety	22	20	Emotional suppression
2	19	1	Guangdong Polytechnic Normal University	1	Chinese Language and Literature	50	12	51	51	63	Moderate depression	58	72	Severe anxiety	23	15	Emotional suppression
2	18	1	Guangdong Polytechnic Normal University	1	Journalism and Communication Studies	44	80	76	29	36	Normal	60	75	Severe anxiety	27	26	Emotional suppression
2	18	1	Shenzhen University	1	Applied Psychology	55	32	80	29	36	Normal	53	66	Moderate anxiety	22	15	Emotional suppression
1	20	1	Guangdong Polytechnic Normal University	1	Finance	56	20	60	37	46	Normal	52	65	Moderate anxiety	28	35	Cognitive Reappraisal
1	20	2	JIAYING UNIVERSITY	1	Physical and Electrical	65	1	59	51	63	Moderate depression	52	65	Moderate anxiety	14	17	Cognitive Reappraisal
1	20	2	Guangdong Polytechnic Normal University	1	Automotive Engineering	60	24	63	53	66	Moderate depression	59	73	Severe anxiety	10	11	Cognitive Reappraisal
2	19	1	Guangdong Polytechnic Normal University	1	Electronic Commerce	49	30	70	39	48	Normal	57	71	Severe anxiety	23	20	Emotional suppression
1	19	2	Guangdong Polytechnic Normal University	1	Finance	55	18	47	47	58	Mild depression	60	75	Severe anxiety	16	21	Cognitive Reappraisal
1	19	1	Guangdong Polytechnic Normal University	1	Tourism Management and Service Education	60	60	47	58	72	Moderate depression	40	50	Normal	16	20	Cognitive Reappraisal
2	18	2	Guangdong Polytechnic Normal University	1	Financial Management	45	16	73	34	42	Normal	48	60	Moderate anxiety	24	13	Emotional suppression
2	20	1	Guangdong Polytechnic Normal University	1	Finance	46.6	6	67	41	51	Normal	48	60	Moderate anxiety	8	11	Cognitive Reappraisal
2	19	1	JIAYING UNIVERSITY	1	Biological Sciences	65	27	57	58	72	Moderate depression	58	72	Severe anxiety	20	23	Cognitive Reappraisal
1	19	1	Guangdong Polytechnic Normal University	1	Administrative Management	68	60	55	44	55	Mild depression	53	66	Moderate anxiety	14	26	Cognitive Reappraisal
2	18	1	Guangdong Polytechnic Normal University	1	Japanese Language and Literature	41.4	60	60	31	38	Normal	57	71	Severe anxiety	12	12	Cognitive Reappraisal
1	20	2	Guangdong Polytechnic Normal University	1	Software Engineering	156	8	85	36	45	Normal	46	57	Mild anxiety	16	30	Cognitive Reappraisal
1	20	2	JIAYING UNIVERSITY	1	Automation	62	18	51	53	66	Moderate depression	45	56	Mild anxiety	18	22	Cognitive Reappraisal
1	20	1	Guangdong Polytechnic Normal University	1	Financial Management	125	60	50	48	60	Mild depression	49	61	Moderate anxiety	18	18	Cognitive Reappraisal
2	18	1	Guangdong Polytechnic Normal University	1	Finance	58	36	75	29	36	Normal	49	61	Moderate anxiety	25	12	Emotional suppression
2	18	1	Guangdong Polytechnic Normal University	1	Financial Accounting Education	56	3	58	52	65	Moderate depression	51	63	Moderate anxiety	15	14	Emotional suppression
2	19	2	JIAYING UNIVERSITY	1	Psychology	49	30	64	29	36	Normal	57	71	Severe anxiety	21	21	Cognitive Reappraisal
1	19	2	Yanching Institude of Technology	1	Environmental Engineering	70	6	59	48	60	Mild depression	67	83	Severe anxiety	15	21	Cognitive Reappraisal
1	19	1	Yanching Institude of Technology	1	Environmental Engineering Technology	126	1	53	50	62	Mild depression	34	42	Normal	12	15	Cognitive Reappraisal
1	19	1	Yanching Institude of Technology	1	Environmental Engineering	80	18	53	47	58	Mild depression	38	47	Normal	4	5	Cognitive Reappraisal
1	19	2	Yanching Institude of Technology	1	Environmental Engineering	120	8	57	49	61	Mild depression	67	83	Severe anxiety	8	14	Cognitive Reappraisal
2	18	2	Yanching Institude of Technology	1	Environmental Engineering Technology	44	6	63	48	60	Mild depression	55	68	Moderate anxiety	14	18	Cognitive Reappraisal
2	18	1	Yanching Institude of Technology	1	Environmental Engineering Technology	47	18	56	47	58	Mild depression	52	65	Moderate anxiety	20	12	Emotional suppression
2	19	1	Yanching Institude of Technology	1	Environmental Engineering Technology	45	10	91	49	61	Mild depression	34	42	Normal	10	11	Cognitive Reappraisal
1	19	1	Yanching Institude of Technology	1	Environmental Engineering Technology	65	6	61	52	65	Moderate depression	53	66	Moderate anxiety	12	15	Cognitive Reappraisal
1	19	2	Yanching Institude of Technology	1	Environmental Engineering Technology	85	60	75	40	50	Normal	54	67	Moderate anxiety	17	19	Cognitive Reappraisal
1	18	2	Yanching Institude of Technology	1	Environmental Engineering Technology	90	9	84	28	35	Normal	54	67	Moderate anxiety	24	22	Emotional suppression
1	19	2	Yanching Institude of Technology	1	Environmental Engineering Technology	68	125	54	45	56	Mild depression	51	63	Moderate anxiety	11	21	Cognitive Reappraisal
1	19	2	Yanching Institude of Technology	1	Environmental Engineering Technology	60	48	59	51	63	Moderate depression	45	56	Mild anxiety	16	19	Cognitive Reappraisal
1	18	2	Yanching Institude of Technology	1	Environmental Engineering Technology	96	80	91	30	37	Normal	40	50	Normal	10	5	Emotional suppression
1	19	2	Yanching Institude of Technology	1	Environmental Engineering Technology	90	64	62	51	63	Moderate depression	34	42	Normal	16	20	Cognitive Reappraisal
1	18	2	Yanching Institude of Technology	1	Environmental Engineering Technology	83	36	50	43	53	Normal	56	70	Severe anxiety	24	20	Emotional suppression
2	18	2	Yanching Institude of Technology	1	Environmental Engineering Technology	47	3	48	65	81	Major Depressive Disorder	57	71	Severe anxiety	20	19	Emotional suppression
2	20	2	JIAYING UNIVERSITY	1	Measurement and Control Technology and Instrumentation	52	27	66	36	45	Normal	48	60	Moderate anxiety	22	15	Emotional suppression
1	20	1	Yanching Institude of Technology	1	Environmental Engineering	75	60	56	46	57	Mild depression	43	53	Mild anxiety	16	20	Cognitive Reappraisal
1	19	2	Yanching Institude of Technology	1	Environmental Engineering Technology	55	9	60	45	56	Mild depression	44	55	Mild anxiety	25	22	Emotional suppression
1	19	1	Guangdong Polytechnic Normal University	1	Applied Statistics	63	60	62	43	53	Normal	53	66	Moderate anxiety	22	26	Cognitive Reappraisal
1	20	2	Yanching Institude of Technology	1	Environmental Engineering Technology	136	24	56	43	53	Normal	43	53	Mild anxiety	19	19	Cognitive Reappraisal
2	18	2	Yanching Institude of Technology	1	Environmental Engineering Technology	70	30	51	52	65	Moderate depression	56	70	Severe anxiety	16	18	Cognitive Reappraisal
2	20	1	JIAYING UNIVERSITY	1	Landscape Architecture	52	36	55	38	47	Normal	49	61	Moderate anxiety	20	24	Cognitive Reappraisal
2	20	2	JIAYING UNIVERSITY	1	Network Engineering	47	6	66	47	58	Mild depression	54	67	Moderate anxiety	26	19	Emotional suppression
2	20	2	JIAYING UNIVERSITY	1	Network Engineering	54	16	46	42	52	Normal	49	61	Moderate anxiety	16	20	Cognitive Reappraisal
1	18	2	Yanching Institude of Technology	1	Big Data and Accounting	100	16	71	52	65	Moderate depression	66	82	Severe anxiety	15	24	Cognitive Reappraisal
2	20	2	Yanching Institude of Technology	1	Big Data and Accounting	52	8	67	52	65	Moderate depression	53	66	Moderate anxiety	10	10	Cognitive Reappraisal
2	19	2	Yanching Institude of Technology	1	Big Data and Accounting	50	2	60	52	65	Moderate depression	34	42	Normal	4	5	Cognitive Reappraisal
2	19	2	Yanching Institude of Technology	1	Big Data and Accounting	50	3	65	52	65	Moderate depression	52	65	Moderate anxiety	9	15	Cognitive Reappraisal
2	19	2	Yanching Institude of Technology	1	Mathematics and Statistics	56	2	61	56	70	Moderate depression	53	66	Moderate anxiety	4	5	Cognitive Reappraisal
2	18	2	Yanching Institude of Technology	1	Big Data and Accounting	45	9	61	42	52	Normal	43	53	Mild anxiety	16	20	Cognitive Reappraisal
2	19	2	Yanching Institude of Technology	1	Big Data and Accounting	48	1	75	49	61	Mild depression	34	42	Normal	4	5	Cognitive Reappraisal
2	19	1	Yanching Institude of Technology	1	Big Data and Accounting	46	60	71	45	56	Mild depression	49	61	Moderate anxiety	10	15	Cognitive Reappraisal
2	18	2	Yanching Institude of Technology	1	Big Data and Accounting	50	16	67	57	71	Moderate depression	33	41	Normal	4	5	Cognitive Reappraisal
2	19	1	Yanching Institude of Technology	1	Big Data and Accounting	50	6	66	54	67	Moderate depression	35	43	Normal	13	17	Cognitive Reappraisal
2	18	1	Yanching Institude of Technology	1	Big Data and Accounting	40	36	73	34	42	Normal	51	63	Moderate anxiety	25	16	Emotional suppression
2	19	2	Yanching Institude of Technology	1	Big Data and Accounting	52	6	52	41	51	Normal	46	57	Mild anxiety	16	20	Cognitive Reappraisal
2	18	2	Yanching Institude of Technology	1	Big Data and Accounting	54	30	47	52	65	Moderate depression	58	72	Severe anxiety	18	18	Cognitive Reappraisal
1	18	2	Yanching Institude of Technology	1	Big Data and Accounting	60	2	57	49	61	Mild depression	37	46	Normal	17	20	Cognitive Reappraisal
2	19	2	Yanching Institude of Technology	1	Big Data and Accounting	60	24	74	33	41	Normal	46	57	Mild anxiety	24	15	Emotional suppression
2	19	1	Yanching Institude of Technology	1	Big Data and Accounting	45	18	81	44	55	Mild depression	34	42	Normal	20	21	Cognitive Reappraisal
2	18	1	Yanching Institude of Technology	1	Big Data and Accounting	65	12	66	37	46	Normal	50	62	Moderate anxiety	20	21	Cognitive Reappraisal
2	19	2	Yanching Institude of Technology	1	Big Data and Accounting	55	9	50	46	57	Mild depression	38	47	Normal	16	20	Cognitive Reappraisal
2	18	2	Yanching Institude of Technology	1	Big Data and Accounting	48	9	89	31	38	Normal	42	52	Mild anxiety	23	26	Cognitive Reappraisal
2	19	2	Yanching Institude of Technology	1	Big Data and Accounting	62	36	57	40	50	Normal	47	58	Mild anxiety	24	20	Emotional suppression
2	19	1	Yanching Institude of Technology	1	Big Data and Accounting	59	9	50	44	55	Mild depression	49	61	Moderate anxiety	19	26	Cognitive Reappraisal
2	18	1	Yanching Institude of Technology	1	Big Data and Accounting	65	12	72	34	42	Normal	47	58	Mild anxiety	23	17	Emotional suppression
2	19	2	Yanching Institude of Technology	1	Big Data and Accounting	55	36	59	39	48	Normal	46	57	Mild anxiety	15	14	Emotional suppression
2	20	2	Yanching Institude of Technology	1	Big Data and Accounting	48	32	52	55	68	Moderate depression	48	60	Moderate anxiety	20	26	Cognitive Reappraisal
2	18	1	Yanching Institude of Technology	1	Big Data and Accounting	60	6	82	28	35	Normal	54	67	Moderate anxiety	20	16	Emotional suppression
2	19	2	Yanching Institude of Technology	1	Big Data and Accounting	60	6	62	33	41	Normal	55	68	Moderate anxiety	15	18	Cognitive Reappraisal
2	19	2	Yanching Institude of Technology	1	Big Data and Accounting	103	32	58	47	58	Mild depression	52	65	Moderate anxiety	16	20	Cognitive Reappraisal
2	18	1	Yanching Institude of Technology	1	Big Data and Accounting	90	24	73	24	30	Normal	55	68	Moderate anxiety	20	16	Emotional suppression
2	19	2	Yanching Institude of Technology	1	Big Data and Accounting	53	60	68	30	37	Normal	50	62	Moderate anxiety	24	14	Emotional suppression
1	19	2	Yanching Institude of Technology	1	Big Data and Accounting	65	60	79	27	33	Normal	49	61	Moderate anxiety	24	29	Cognitive Reappraisal
2	20	2	Yanching Institude of Technology	1	Big Data and Accounting	110	60	64	36	45	Normal	57	71	Severe anxiety	22	19	Emotional suppression
2	18	2	Yanching Institude of Technology	1	Big Data and Accounting	72	60	65	46	57	Mild depression	55	68	Moderate anxiety	14	15	Cognitive Reappraisal
1	19	2	Yanching Institude of Technology	1	Big Data and Accounting	80	60	64	45	56	Mild depression	50	62	Moderate anxiety	22	22	Cognitive Reappraisal
2	18	1	Yanching Institude of Technology	1	Big Data and Accounting	66	24	52	46	57	Mild depression	43	53	Mild anxiety	22	21	Emotional suppression
2	19	2	Guangdong Polytechnic Normal University	1	Primary Education	58	12	73	34	42	Normal	47	58	Mild anxiety	25	16	Emotional suppression
2	19	1	Guangdong Polytechnic Normal University	1	Broadcast and Television Production	47	60	64	39	48	Normal	45	56	Mild anxiety	19	18	Emotional suppression
1	19	2	Guangdong Polytechnic Normal University	1	Data Science and Big Data Technology	65	48	60	45	56	Mild depression	43	53	Mild anxiety	24	18	Emotional suppression
1	20	1	JIAYING UNIVERSITY	1	Horticulture	95	1	73	68	85	Major Depressive Disorder	63	78	Severe anxiety	8	21	Cognitive Reappraisal
1	24	2	JINGDEZHEN CERAMIC UNIVERSITY	2	Physical Education	69	80	71	38	47	Normal	49	61	Moderate anxiety	20	26	Cognitive Reappraisal
1	23	2	JINGDEZHEN CERAMIC UNIVERSITY	2	Physical Education	130	80	66	38	47	Normal	54	67	Moderate anxiety	24	20	Emotional suppression
1	22	2	JINGDEZHEN CERAMIC UNIVERSITY	2	Physical Education	60	80	70	38	47	Normal	48	60	Moderate anxiety	17	22	Cognitive Reappraisal
1	24	2	JINGDEZHEN CERAMIC UNIVERSITY	2	Physical Education	60	48	58	40	50	Normal	47	58	Mild anxiety	16	17	Cognitive Reappraisal
1	24	2	JINGDEZHEN CERAMIC UNIVERSITY	2	Physical Education	66	60	72	33	41	Normal	49	61	Moderate anxiety	22	18	Emotional suppression
1	23	1	JINGDEZHEN CERAMIC UNIVERSITY	2	Physical Education	75	48	76	38	47	Normal	48	60	Moderate anxiety	24	30	Cognitive Reappraisal
1	25	2	JINGDEZHEN CERAMIC UNIVERSITY	2	Physical Education	70	60	76	51	63	Moderate depression	34	42	Normal	4	5	Cognitive Reappraisal
2	19	1	JIAYING UNIVERSITY	1	Biological Sciences	49	45	75	28	35	Normal	52	65	Moderate anxiety	22	22	Cognitive Reappraisal
1	22	1	YICHUN EARLY CHILDHOOD TEACHERS COLLEGE	1	Community Sports	65	75	58	52	65	Moderate depression	53	66	Moderate anxiety	14	16	Cognitive Reappraisal
1	21	1	Guizhou Vocational and Technical College of Water Resources and Hydropower	1	Engineering Technology and Surveying	100	36	51	54	67	Moderate depression	90	112	Severe anxiety	28	35	Cognitive Reappraisal
1	24	1	JIAYING UNIVERSITY	2	Physical Education	62	100	67	47	58	Mild depression	46	57	Mild anxiety	25	34	Cognitive Reappraisal
1	24	2	JINGDEZHEN CERAMIC UNIVERSITY	2	Physical Education	61	80	63	42	52	Normal	42	52	Mild anxiety	18	21	Cognitive Reappraisal
1	22	2	JINGDEZHEN CERAMIC UNIVERSITY	2	Physical Education	70	100	63	29	36	Normal	59	73	Severe anxiety	20	15	Emotional suppression
2	22	1	JINGDEZHEN CERAMIC UNIVERSITY	2	Physical Education	70	64	81	27	33	Normal	53	66	Moderate anxiety	17	18	Cognitive Reappraisal
2	18	1	ShANDONG VOCATIONAL UNIVERSITY OF FOREIGN AFFAIRS	1	Cloud Computing	50	1	54	55	68	Moderate depression	66	82	Severe anxiety	12	16	Cognitive Reappraisal
2	20	2	JINGDEZHEN CERAMIC UNIVERSITY	2	Physical Education	60	75	54	55	68	Moderate depression	39	48	Normal	15	18	Cognitive Reappraisal
1	23	1	JINGDEZHEN CERAMIC UNIVERSITY	2	Physical Education	65	60	65	33	41	Normal	51	63	Moderate anxiety	23	30	Cognitive Reappraisal
1	24	2	ZhEJING NORMAL UNIVERSITY	2	Physical Education	59	80	69	39	48	Normal	54	67	Moderate anxiety	23	29	Cognitive Reappraisal
2	18	2	Yanching Institude of Technology	1	Finance	60	36	62	50	62	Mild depression	55	68	Moderate anxiety	14	19	Cognitive Reappraisal
2	19	2	Yanching Institude of Technology	1	Finance	46	36	57	48	60	Mild depression	53	66	Moderate anxiety	16	20	Cognitive Reappraisal
2	19	1	Yanching Institude of Technology	1	Finance	51	18	67	48	60	Mild depression	36	45	Normal	7	8	Cognitive Reappraisal
1	19	1	Yanching Institude of Technology	1	Finance	70	100	80	48	60	Mild depression	57	71	Severe anxiety	27	27	Cognitive Reappraisal
2	19	2	Yanching Institude of Technology	1	Finance	63	9	57	54	67	Moderate depression	52	65	Moderate anxiety	12	15	Cognitive Reappraisal
1	19	2	Yanching Institude of Technology	1	Finance	55	18	70	57	71	Moderate depression	58	72	Severe anxiety	23	30	Cognitive Reappraisal
2	19	1	Yanching Institude of Technology	1	Finance	70	32	55	57	71	Moderate depression	51	63	Moderate anxiety	18	23	Cognitive Reappraisal
2	19	2	Yanching Institude of Technology	1	Finance	68	12	57	36	45	Normal	47	58	Mild anxiety	21	18	Emotional suppression
2	19	2	Yanching Institude of Technology	1	Financial Management	50	4	44	56	70	Moderate depression	55	68	Moderate anxiety	22	24	Cognitive Reappraisal
2	21	1	Yanching Institude of Technology	1	Finance	49	9	79	37	46	Normal	51	63	Moderate anxiety	24	14	Emotional suppression
1	19	2	Yanching Institude of Technology	1	Finance	105	2	38	34	42	Normal	54	67	Moderate anxiety	17	21	Cognitive Reappraisal
1	20	2	Yanching Institude of Technology	1	Finance	69	60	46	33	41	Normal	51	63	Moderate anxiety	14	17	Cognitive Reappraisal
2	20	2	Yanching Institude of Technology	1	Finance	55	12	75	48	60	Mild depression	53	66	Moderate anxiety	22	22	Cognitive Reappraisal
1	19	1	Yanching Institude of Technology	1	Finance	75	6	79	29	36	Normal	50	62	Moderate anxiety	28	17	Emotional suppression
2	18	2	Yanching Institude of Technology	1	Financial Management	90	36	66	39	48	Normal	38	47	Normal	13	15	Cognitive Reappraisal
2	19	1	Yanching Institude of Technology	1	Finance	56	18	60	52	65	Moderate depression	58	72	Severe anxiety	21	29	Cognitive Reappraisal
2	19	2	Yanching Institude of Technology	1	Financial Management	50	9	61	52	65	Moderate depression	37	46	Normal	17	19	Cognitive Reappraisal
2	20	2	Yanching Institude of Technology	1	Finance	49	4	57	46	57	Mild depression	46	57	Mild anxiety	16	17	Cognitive Reappraisal
2	19	2	Yanching Institude of Technology	1	Finance	80	1	64	37	46	Normal	50	62	Moderate anxiety	14	18	Cognitive Reappraisal
2	19	2	Yanching Institude of Technology	1	Finance	48	24	61	38	47	Normal	48	60	Moderate anxiety	22	10	Emotional suppression
1	19	2	Yanching Institude of Technology	1	Finance	52	18	46	51	63	Moderate depression	55	68	Moderate anxiety	20	22	Cognitive Reappraisal
2	19	1	Yanching Institude of Technology	1	Finance	49	6	51	54	67	Moderate depression	55	68	Moderate anxiety	20	24	Cognitive Reappraisal
2	18	2	Yanching Institude of Technology	1	Financial Management	60	12	91	26	32	Normal	49	61	Moderate anxiety	21	17	Emotional suppression
2	19	1	Yanching Institude of Technology	1	Financial Management	75	32	71	38	47	Normal	48	60	Moderate anxiety	15	13	Emotional suppression
2	19	1	Yanching Institude of Technology	1	Financial Management	55	32	67	42	52	Normal	46	57	Mild anxiety	20	23	Cognitive Reappraisal
2	18	2	Yanching Institude of Technology	1	Financial Management	60	18	47	41	51	Normal	48	60	Moderate anxiety	16	20	Cognitive Reappraisal
2	19	2	Yanching Institude of Technology	1	Financial Management	55	24	47	50	62	Mild depression	40	50	Normal	28	23	Emotional suppression
2	18	2	Yanching Institude of Technology	1	Financial Management	56	9	60	43	53	Normal	42	52	Mild anxiety	12	14	Cognitive Reappraisal
2	17	1	Yanching Institude of Technology	1	Finance	130	30	56	36	45	Normal	65	81	Severe anxiety	25	21	Emotional suppression
1	18	1	Yanching Institude of Technology	1	Finance	60	75	71	39	48	Normal	51	63	Moderate anxiety	22	12	Emotional suppression
2	18	2	Yanching Institude of Technology	1	Financial Management	61	8	55	52	65	Moderate depression	53	66	Moderate anxiety	18	19	Cognitive Reappraisal
2	19	2	Yanching Institude of Technology	1	Financial Management	54	9	66	42	52	Normal	42	52	Mild anxiety	16	20	Cognitive Reappraisal
2	20	2	Yanching Institude of Technology	1	Financial Management	63	2	50	47	58	Mild depression	61	76	Severe anxiety	19	20	Cognitive Reappraisal
2	20	2	Yanching Institude of Technology	1	Financial Management	55	48	52	33	41	Normal	59	73	Severe anxiety	19	10	Emotional suppression
2	18	2	Yanching Institude of Technology	1	Finance	72	30	53	33	41	Normal	50	62	Moderate anxiety	23	18	Emotional suppression
2	18	1	Yanching Institude of Technology	1	Financial Management	55	1	54	40	50	Normal	59	73	Severe anxiety	7	6	Emotional suppression
2	20	1	Yanching Institude of Technology	1	Finance	45	18	71	25	31	Normal	53	66	Moderate anxiety	18	19	Cognitive Reappraisal
2	19	2	Yanching Institude of Technology	1	Financial Management	70	2	58	48	60	Mild depression	54	67	Moderate anxiety	12	14	Cognitive Reappraisal
1	24	2	JINGDEZHEN CERAMIC UNIVERSITY	2	Physical Education	72	48	79	46	57	Mild depression	37	46	Normal	12	15	Cognitive Reappraisal
1	25	2	JINGDEZHEN CERAMIC UNIVERSITY	2	Physical Education	68	48	68	36	45	Normal	47	58	Mild anxiety	22	20	Emotional suppression
1	22	1	JINGDEZHEN CERAMIC UNIVERSITY	2	Physical Education	75	80	59	41	51	Normal	43	53	Mild anxiety	24	18	Emotional suppression
2	26	1	XI`AN PHYSACAL EDUCATION UnIVERSITY	2	Physical Education	60	40	64	36	45	Normal	51	63	Moderate anxiety	23	24	Cognitive Reappraisal
1	21	2	JINGDEZHEN CERAMIC UNIVERSITY	2	Physical Education	78	80	58	47	58	Mild depression	41	51	Mild anxiety	23	27	Cognitive Reappraisal
1	23	2	JINGDEZHEN CERAMIC UNIVERSITY	2	Physical Education	72	80	72	37	46	Normal	43	53	Mild anxiety	23	25	Cognitive Reappraisal
1	20	2	HUNAN UNIVERSITY OF ARTS AND SCIENCE	2	Mechanical Design, Manufacturing, and Automation	78	27	57	48	60	Mild depression	48	60	Moderate anxiety	20	21	Cognitive Reappraisal
1	20	1	HUNAN UNIVERSITY OF ARTS AND SCIENCE	2	Mechanical Design, Manufacturing, and Automation	75	100	70	50	62	Mild depression	46	57	Mild anxiety	15	18	Cognitive Reappraisal
1	20	1	HUNAN UNIVERSITY OF ARTS AND SCIENCE	2	Mechanical Design, Manufacturing, and Automation	60	48	75	49	61	Mild depression	45	56	Mild anxiety	5	5	Cognitive Reappraisal
1	20	2	HUNAN UNIVERSITY OF ARTS AND SCIENCE	2	Mechanical Design, Manufacturing, and Automation	120	4	57	52	65	Moderate depression	34	42	Normal	16	20	Cognitive Reappraisal
1	21	2	HUNAN UNIVERSITY OF ARTS AND SCIENCE	2	Mechanical Design, Manufacturing, and Automation	65	25	65	51	63	Moderate depression	34	42	Normal	4	5	Cognitive Reappraisal
1	19	1	HUNAN UNIVERSITY OF ARTS AND SCIENCE	2	Mechanical Design, Manufacturing, and Automation	115	4	57	50	62	Mild depression	55	68	Moderate anxiety	14	17	Cognitive Reappraisal
1	19	1	HUNAN UNIVERSITY OF ARTS AND SCIENCE	2	Mechanical Design, Manufacturing, and Automation	80	9	65	52	65	Moderate depression	53	66	Moderate anxiety	11	15	Cognitive Reappraisal
1	20	2	HUNAN UNIVERSITY OF ARTS AND SCIENCE	2	Mechanical Design, Manufacturing, and Automation	78	64	47	48	60	Mild depression	60	75	Severe anxiety	16	18	Cognitive Reappraisal
1	20	2	HUNAN UNIVERSITY OF ARTS AND SCIENCE	2	Mechanical Design, Manufacturing, and Automation	85	36	59	50	62	Mild depression	53	66	Moderate anxiety	12	15	Cognitive Reappraisal
1	19	2	HUNAN UNIVERSITY OF ARTS AND SCIENCE	2	Mechanical Design, Manufacturing, and Automation	52	12	61	51	63	Moderate depression	53	66	Moderate anxiety	16	18	Cognitive Reappraisal
1	20	1	HUNAN UNIVERSITY OF ARTS AND SCIENCE	2	Mechanical Design, Manufacturing, and Automation	61	12	57	47	58	Mild depression	50	62	Moderate anxiety	11	24	Cognitive Reappraisal
1	20	2	HUNAN UNIVERSITY OF ARTS AND SCIENCE	2	Mechanical Design, Manufacturing, and Automation	57	125	89	48	60	Mild depression	34	42	Normal	10	11	Cognitive Reappraisal
1	20	1	HUNAN UNIVERSITY OF ARTS AND SCIENCE	2	Mechanical Design, Manufacturing, and Automation	75	6	49	53	66	Moderate depression	55	68	Moderate anxiety	16	26	Cognitive Reappraisal
1	21	1	HUNAN UNIVERSITY OF ARTS AND SCIENCE	2	Mechanical Design, Manufacturing, and Automation	67	27	76	41	51	Normal	51	63	Moderate anxiety	22	24	Cognitive Reappraisal
2	21	1	HUNAN UNIVERSITY OF ARTS AND SCIENCE	2	Mechanical Design, Manufacturing, and Automation	47	6	50	43	53	Normal	49	61	Moderate anxiety	17	21	Cognitive Reappraisal
1	19	2	HUNAN UNIVERSITY OF ARTS AND SCIENCE	2	Mechanical Design, Manufacturing, and Automation	80	20	57	45	56	Mild depression	53	66	Moderate anxiety	20	26	Cognitive Reappraisal
2	18	1	HUNAN UNIVERSITY OF ARTS AND SCIENCE	2	Mechanical Design, Manufacturing, and Automation	52	3	41	49	61	Mild depression	54	67	Moderate anxiety	22	28	Cognitive Reappraisal
2	19	2	HUNAN UNIVERSITY OF ARTS AND SCIENCE	2	Mechanical Design, Manufacturing, and Automation	48	10	46	53	66	Moderate depression	53	66	Moderate anxiety	23	16	Emotional suppression
2	19	1	Yanching Institude of Technology	1	Chinese Language and Literature	65	4	61	54	67	Moderate depression	47	58	Mild anxiety	12	15	Cognitive Reappraisal
1	20	2	HUNAN UNIVERSITY OF ARTS AND SCIENCE	2	Mechanical Design, Manufacturing, and Automation	58	36	52	49	61	Mild depression	42	52	Mild anxiety	19	17	Emotional suppression
1	22	2	HUNAN UNIVERSITY OF ARTS AND SCIENCE	2	Mechanical Design, Manufacturing, and Automation	58	12	60	49	61	Mild depression	52	65	Moderate anxiety	13	23	Cognitive Reappraisal
1	20	2	HUNAN UNIVERSITY OF ARTS AND SCIENCE	2	Mechanical Design, Manufacturing, and Automation	65	48	74	29	36	Normal	54	67	Moderate anxiety	22	13	Emotional suppression
1	21	1	HUNAN UNIVERSITY OF ARTS AND SCIENCE	2	Mechanical Design, Manufacturing, and Automation	46	48	63	49	61	Mild depression	43	53	Mild anxiety	24	15	Emotional suppression
1	20	2	HUNAN UNIVERSITY OF ARTS AND SCIENCE	2	Mechanical Design, Manufacturing, and Automation	63	64	60	52	65	Moderate depression	56	70	Severe anxiety	23	16	Emotional suppression
1	20	2	HUNAN UNIVERSITY OF ARTS AND SCIENCE	2	Mechanical Design, Manufacturing, and Automation	65	75	65	45	56	Mild depression	52	65	Moderate anxiety	18	18	Cognitive Reappraisal
1	20	2	HUNAN UNIVERSITY OF ARTS AND SCIENCE	2	Mechanical Design, Manufacturing, and Automation	62	10	53	46	57	Mild depression	46	57	Mild anxiety	24	30	Cognitive Reappraisal
1	20	1	HUNAN UNIVERSITY OF ARTS AND SCIENCE	2	Mechanical Design, Manufacturing, and Automation	65	24	66	51	63	Moderate depression	43	53	Mild anxiety	12	16	Cognitive Reappraisal
1	19	2	HUNAN UNIVERSITY OF ARTS AND SCIENCE	2	Mechanical Design, Manufacturing, and Automation	62	48	55	52	65	Moderate depression	48	60	Moderate anxiety	20	24	Cognitive Reappraisal
2	19	2	Yanching Institude of Technology	1	Chinese Language and Literature	47	60	60	39	48	Normal	49	61	Moderate anxiety	19	16	Emotional suppression
1	18	2	HUNAN UNIVERSITY OF ARTS AND SCIENCE	2	Mechanical Design, Manufacturing, and Automation	56	12	50	46	57	Mild depression	63	78	Severe anxiety	22	20	Emotional suppression
1	21	1	HUNAN UNIVERSITY OF ARTS AND SCIENCE	2	Mechanical Design, Manufacturing, and Automation	60	18	39	49	61	Mild depression	50	62	Moderate anxiety	23	23	Cognitive Reappraisal
1	21	2	HUNAN UNIVERSITY OF ARTS AND SCIENCE	2	Mechanical Design, Manufacturing, and Automation	76	40	50	52	65	Moderate depression	40	50	Normal	23	28	Cognitive Reappraisal
2	22	2	HUNAN UNIVERSITY OF ARTS AND SCIENCE	2	Mechanical Design, Manufacturing, and Automation	100	4	43	54	67	Moderate depression	55	68	Moderate anxiety	23	22	Emotional suppression
2	18	1	Yanching Institude of Technology	1	Chinese Language and Literature	50	12	62	47	58	Mild depression	52	65	Moderate anxiety	16	22	Cognitive Reappraisal
2	18	2	Yanching Institude of Technology	1	Chinese Language and Literature	70	30	79	33	41	Normal	50	62	Moderate anxiety	23	13	Emotional suppression
1	19	1	Yanching Institude of Technology	1	Chinese Language and Literature	95	24	70	43	53	Normal	54	67	Moderate anxiety	24	28	Cognitive Reappraisal
1	21	2	HUNAN UNIVERSITY OF ARTS AND SCIENCE	2	Mechanical Design, Manufacturing, and Automation	69	48	61	39	48	Normal	57	71	Severe anxiety	26	23	Emotional suppression
2	19	1	Yanching Institude of Technology	1	Chinese Language and Literature	130	100	51	47	58	Mild depression	42	52	Mild anxiety	5	12	Cognitive Reappraisal
2	18	2	Yanching Institude of Technology	1	Chinese Language and Literature	50	4	67	35	43	Normal	62	77	Severe anxiety	22	26	Cognitive Reappraisal
2	19	2	Yanching Institude of Technology	1	Chinese Language and Literature	53	16	87	36	45	Normal	45	56	Mild anxiety	19	15	Emotional suppression
2	19	2	Yanching Institude of Technology	1	Chinese Language and Literature	50	4	61	40	50	Normal	51	63	Moderate anxiety	23	24	Cognitive Reappraisal
2	19	2	Yanching Institude of Technology	1	Chinese Language and Literature	62	16	82	45	56	Mild depression	52	65	Moderate anxiety	20	16	Emotional suppression
2	19	2	Yanching Institude of Technology	1	Ophthalmology and Optometry	49	40	57	55	68	Moderate depression	55	68	Moderate anxiety	9	10	Cognitive Reappraisal
2	19	1	Yanching Institude of Technology	1	Chinese Language and Literature	65	1	41	49	61	Mild depression	62	77	Severe anxiety	17	15	Emotional suppression
2	19	2	Yanching Institude of Technology	1	Chinese Language and Literature	65	36	63	39	48	Normal	54	67	Moderate anxiety	22	18	Emotional suppression
2	18	1	Yanching Institude of Technology	1	Chinese Language and Literature	45	18	51	52	65	Moderate depression	49	61	Moderate anxiety	20	20	Cognitive Reappraisal
1	18	2	Yanching Institude of Technology	1	Chinese Language and Literature	67	16	91	30	37	Normal	51	63	Moderate anxiety	24	32	Cognitive Reappraisal
2	20	2	Yanching Institude of Technology	1	Chinese Language and Literature	50	48	57	47	58	Mild depression	54	67	Moderate anxiety	17	21	Cognitive Reappraisal
2	18	2	Yanching Institude of Technology	1	Chinese Language and Literature	65	10	63	41	51	Normal	42	52	Mild anxiety	18	17	Emotional suppression
2	19	1	Yanching Institude of Technology	1	Chinese Language and Literature	50	24	64	30	37	Normal	54	67	Moderate anxiety	24	11	Emotional suppression
2	19	2	Yanching Institude of Technology	1	Chinese Language and Literature	63	6	59	46	57	Mild depression	52	65	Moderate anxiety	17	16	Emotional suppression
2	19	2	Yanching Institude of Technology	1	Chinese Language and Literature	44	16	73	39	48	Normal	54	67	Moderate anxiety	24	16	Emotional suppression
1	19	2	Yanching Institude of Technology	1	Chinese Language and Literature	60	48	77	36	45	Normal	43	53	Mild anxiety	18	17	Emotional suppression
2	19	2	Yanching Institude of Technology	1	Chinese Language and Literature	57	24	62	40	50	Normal	55	68	Moderate anxiety	23	24	Cognitive Reappraisal
2	18	1	Yanching Institude of Technology	1	Chinese Language and Literature	46	20	62	38	47	Normal	51	63	Moderate anxiety	15	8	Emotional suppression
2	18	2	Yanching Institude of Technology	1	Chinese Language and Literature	52	32	74	35	43	Normal	46	57	Mild anxiety	20	25	Cognitive Reappraisal
2	19	2	Yanching Institude of Technology	1	Chinese Language and Literature	55	24	70	32	40	Normal	65	81	Severe anxiety	21	16	Emotional suppression
2	19	1	Yanching Institude of Technology	1	Chinese Language and Literature	55	1	64	44	55	Mild depression	51	63	Moderate anxiety	13	15	Cognitive Reappraisal
2	18	2	Yanching Institude of Technology	1	Chinese Language and Literature	69	32	85	29	36	Normal	54	67	Moderate anxiety	14	10	Emotional suppression
2	18	1	Yanching Institude of Technology	1	Chinese Language and Literature	58	8	63	42	52	Normal	60	75	Severe anxiety	21	24	Cognitive Reappraisal
2	19	2	Yanching Institude of Technology	1	Chinese Language and Literature	51	24	83	42	52	Normal	55	68	Moderate anxiety	24	18	Emotional suppression
1	20	2	HUNAN UNIVERSITY OF ARTS AND SCIENCE	2	Mechanical Design, Manufacturing, and Automation	60	6	65	40	50	Normal	49	61	Moderate anxiety	22	21	Emotional suppression
2	18	1	Yanching Institude of Technology	1	Chinese Language and Literature	47	12	51	36	45	Normal	59	73	Severe anxiety	19	13	Emotional suppression
2	20	2	Yanching Institude of Technology	1	Chinese Language and Literature	48	40	64	38	47	Normal	52	65	Moderate anxiety	15	15	Cognitive Reappraisal
2	19	2	Yanching Institude of Technology	1	Chinese Language and Literature	75	18	63	43	53	Normal	45	56	Mild anxiety	20	16	Emotional suppression
2	18	2	Yanching Institude of Technology	1	Chinese Language and Literature	80	36	57	43	53	Normal	57	71	Severe anxiety	20	22	Cognitive Reappraisal
2	19	2	Yanching Institude of Technology	1	Chinese Language and Literature	64	48	56	50	62	Mild depression	50	62	Moderate anxiety	24	20	Emotional suppression
2	18	2	Yanching Institude of Technology	1	Chinese Language and Literature	78	24	74	36	45	Normal	44	55	Mild anxiety	23	16	Emotional suppression
2	19	2	Yanching Institude of Technology	1	Chinese Language and Literature	65	2	44	42	52	Normal	71	88	Severe anxiety	17	25	Cognitive Reappraisal
2	18	2	Yanching Institude of Technology	1	Chinese Language and Literature	63	36	61	40	50	Normal	43	53	Mild anxiety	19	24	Cognitive Reappraisal
1	19	2	Yanching Institude of Technology	1	Chinese Language and Literature	80	40	63	44	55	Mild depression	49	61	Moderate anxiety	18	17	Emotional suppression
1	20	2	Yanching Institude of Technology	1	Chinese Language and Literature	90	60	69	34	42	Normal	50	62	Moderate anxiety	24	17	Emotional suppression
2	18	2	Yanching Institude of Technology	1	Chinese Language and Literature	50	4	44	54	67	Moderate depression	60	75	Severe anxiety	14	11	Emotional suppression
2	19	2	Yanching Institude of Technology	1	Chinese Language and Literature	57.1	36	64	66	82	Major Depressive Disorder	46	57	Mild anxiety	20	22	Cognitive Reappraisal
2	18	2	Yanching Institude of Technology	1	Chinese Language and Literature	49	32	86	30	37	Normal	51	63	Moderate anxiety	23	17	Emotional suppression
2	18	2	Yanching Institude of Technology	1	Chinese Language and Literature	50	27	67	37	46	Normal	43	53	Mild anxiety	18	14	Emotional suppression
1	20	2	Yanching Institude of Technology	1	Chinese Language and Literature	70	24	58	43	53	Normal	60	75	Severe anxiety	19	20	Cognitive Reappraisal
2	19	2	Yanching Institude of Technology	1	Chinese Language and Literature	62	15	58	36	45	Normal	44	55	Mild anxiety	17	21	Cognitive Reappraisal
2	19	1	Yanching Institude of Technology	1	Chinese Language and Literature	68	80	75	42	52	Normal	53	66	Moderate anxiety	24	25	Cognitive Reappraisal
1	18	2	Yanching Institude of Technology	1	Primary Education	170	27	56	52	65	Moderate depression	50	62	Moderate anxiety	16	19	Cognitive Reappraisal
2	19	2	Yanching Institude of Technology	1	Primary Education	55	18	50	49	61	Mild depression	56	70	Severe anxiety	12	15	Cognitive Reappraisal
2	18	1	Yanching Institude of Technology	1	Primary Education	46	24	56	53	66	Moderate depression	53	66	Moderate anxiety	17	18	Cognitive Reappraisal
2	20	2	Yanching Institude of Technology	1	Primary Education	70	6	44	49	61	Mild depression	55	68	Moderate anxiety	20	23	Cognitive Reappraisal
2	19	1	Yanching Institude of Technology	1	Primary Education	55	2	53	51	63	Moderate depression	53	66	Moderate anxiety	20	21	Cognitive Reappraisal
2	19	1	Yanching Institude of Technology	1	Primary Education	51	3	59	50	62	Mild depression	53	66	Moderate anxiety	16	20	Cognitive Reappraisal
2	19	1	Yanching Institude of Technology	1	Primary Education	41	18	57	41	51	Normal	42	52	Mild anxiety	16	14	Emotional suppression
2	19	1	Yanching Institude of Technology	1	Primary Education	80	18	63	41	51	Normal	53	66	Moderate anxiety	18	18	Cognitive Reappraisal
2	18	2	Yanching Institude of Technology	1	Primary Education	50	24	60	50	62	Mild depression	64	80	Severe anxiety	16	20	Cognitive Reappraisal
2	18	2	Yanching Institude of Technology	1	Primary Education	49	4	57	52	65	Moderate depression	53	66	Moderate anxiety	16	20	Cognitive Reappraisal
1	18	2	Yanching Institude of Technology	1	Primary Education	55	60	43	65	81	Major Depressive Disorder	64	80	Severe anxiety	15	20	Cognitive Reappraisal
2	18	2	Yanching Institude of Technology	1	Primary Education	48	6	67	46	57	Mild depression	48	60	Moderate anxiety	16	20	Cognitive Reappraisal
2	19	2	Yanching Institude of Technology	1	Primary Education	60	12	63	46	57	Mild depression	46	57	Mild anxiety	20	24	Cognitive Reappraisal
2	19	1	Yanching Institude of Technology	1	Primary Education	58.5	12	54	54	67	Moderate depression	51	63	Moderate anxiety	28	35	Cognitive Reappraisal
2	18	1	Yanching Institude of Technology	1	Primary Education	67	12	53	48	60	Mild depression	46	57	Mild anxiety	20	20	Cognitive Reappraisal
2	18	2	Yanching Institude of Technology	1	Primary Education	55	3	71	35	43	Normal	55	68	Moderate anxiety	19	23	Cognitive Reappraisal
2	18	1	Yanching Institude of Technology	1	Primary Education	35	18	80	33	41	Normal	55	68	Moderate anxiety	23	16	Emotional suppression
2	19	2	Yanching Institude of Technology	1	Primary Education	52	3	57	50	62	Mild depression	39	48	Normal	17	21	Cognitive Reappraisal
2	19	2	Yanching Institude of Technology	1	Primary Education	58	12	65	46	57	Mild depression	45	56	Mild anxiety	20	13	Emotional suppression
2	19	2	Yanching Institude of Technology	1	Primary Education	65	6	70	36	45	Normal	54	67	Moderate anxiety	21	12	Emotional suppression
2	18	2	Yanching Institude of Technology	1	Primary Education	50	6	62	41	51	Normal	48	60	Moderate anxiety	21	19	Emotional suppression
2	18	2	Yanching Institude of Technology	1	Primary Education	63	12	52	40	50	Normal	53	66	Moderate anxiety	16	13	Emotional suppression
2	19	2	Yanching Institude of Technology	1	Primary Education	58	18	76	28	35	Normal	52	65	Moderate anxiety	22	19	Emotional suppression
2	19	2	Yanching Institude of Technology	1	Primary Education	55	8	65	39	48	Normal	40	50	Normal	17	21	Cognitive Reappraisal
2	19	1	Yanching Institude of Technology	1	Primary Education	59	12	50	44	55	Mild depression	54	67	Moderate anxiety	19	19	Cognitive Reappraisal
2	19	1	Yanching Institude of Technology	1	Primary Education	50	12	57	40	50	Normal	48	60	Moderate anxiety	21	19	Emotional suppression
2	18	1	Yanching Institude of Technology	1	Primary Education	55	27	62	51	63	Moderate depression	52	65	Moderate anxiety	26	21	Emotional suppression
2	19	2	Yanching Institude of Technology	1	Primary Education	75	18	58	51	63	Moderate depression	51	63	Moderate anxiety	19	20	Cognitive Reappraisal
2	19	2	Yanching Institude of Technology	1	Primary Education	70	48	64	46	57	Mild depression	51	63	Moderate anxiety	21	24	Cognitive Reappraisal
2	19	2	Yanching Institude of Technology	1	Primary Education	126	60	57	47	58	Mild depression	57	71	Severe anxiety	21	19	Emotional suppression
2	19	2	Yanching Institude of Technology	1	Primary Education	58	8	47	44	55	Mild depression	50	62	Moderate anxiety	8	10	Cognitive Reappraisal
2	19	2	Yanching Institude of Technology	1	Primary Education	46	60	66	41	51	Normal	60	75	Severe anxiety	19	12	Emotional suppression
2	18	2	Yanching Institude of Technology	1	Primary Education	40	6	64	44	55	Mild depression	52	65	Moderate anxiety	19	15	Emotional suppression
2	20	1	Yanching Institude of Technology	1	Primary Education	60	36	53	45	56	Mild depression	50	62	Moderate anxiety	16	20	Cognitive Reappraisal
2	19	2	Yanching Institude of Technology	1	Primary Education	50	6	59	44	55	Mild depression	48	60	Moderate anxiety	19	17	Emotional suppression
2	19	1	Yanching Institude of Technology	1	Primary Education	51	30	78	40	50	Normal	52	65	Moderate anxiety	28	11	Emotional suppression
2	19	1	Yanching Institude of Technology	1	Primary Education	90	24	69	28	35	Normal	55	68	Moderate anxiety	20	15	Emotional suppression
2	19	1	Yanching Institude of Technology	1	Primary Education	55	18	62	37	46	Normal	56	70	Severe anxiety	14	13	Emotional suppression
2	21	2	Yanching Institude of Technology	1	Primary Education	77	60	55	53	66	Moderate depression	58	72	Severe anxiety	14	24	Cognitive Reappraisal
1	19	2	Yanching Institude of Technology	1	Primary Education	70	60	67	29	36	Normal	42	52	Mild anxiety	14	19	Cognitive Reappraisal
2	19	2	Yanching Institude of Technology	1	Primary Education	60	1	37	63	78	Major Depressive Disorder	48	60	Moderate anxiety	16	11	Emotional suppression
2	19	2	Yanching Institude of Technology	1	Primary Education	43	6	42	56	70	Moderate depression	54	67	Moderate anxiety	21	22	Cognitive Reappraisal
2	19	2	Yanching Institude of Technology	1	Primary Education	60	40	49	49	61	Mild depression	58	72	Severe anxiety	16	19	Cognitive Reappraisal
2	19	1	Yanching Institude of Technology	1	Primary Education	48	36	53	37	46	Normal	50	62	Moderate anxiety	18	11	Emotional suppression
2	19	1	Yanching Institude of Technology	1	Primary Education	52	4	61	52	65	Moderate depression	40	50	Normal	19	21	Cognitive Reappraisal
2	18	2	Yanching Institude of Technology	1	Primary Education	62	24	71	47	58	Mild depression	51	63	Moderate anxiety	21	25	Cognitive Reappraisal
1	19	1	Yanching Institude of Technology	1	Primary Education	70	6	54	52	65	Moderate depression	47	58	Mild anxiety	12	15	Cognitive Reappraisal
1	24	2	JINGDEZHEN CERAMIC UNIVERSITY	2	Physical Education	64	60	23	56	70	Moderate depression	48	60	Moderate anxiety	11	16	Cognitive Reappraisal
2	21	2	Yanching Institude of Technology	1	Primary Education	61	8	58	48	60	Mild depression	60	75	Severe anxiety	24	25	Cognitive Reappraisal
2	19	2	Yanching Institude of Technology	1	Broadcasting and Hosting Art	48	12	66	41	51	Normal	56	70	Severe anxiety	20	29	Cognitive Reappraisal
2	22	2	Yanching Institude of Technology	1	Primary Education	64	2	54	38	47	Normal	45	56	Mild anxiety	22	23	Cognitive Reappraisal
2	21	2	Yanching Institude of Technology	1	Chinese Language and Literature	50	8	64	48	60	Mild depression	45	56	Mild anxiety	19	18	Emotional suppression
2	22	2	Yanching Institude of Technology	1	Primary Education	54	9	68	42	52	Normal	47	58	Mild anxiety	24	19	Emotional suppression
2	21	2	Yanching Institude of Technology	1	Chinese Language and Literature	41	6	60	39	48	Normal	48	60	Moderate anxiety	19	16	Emotional suppression
2	20	2	Yanching Institude of Technology	1	Chinese Language and Literature	46	20	50	47	58	Mild depression	58	72	Severe anxiety	21	18	Emotional suppression
2	23	2	Yanching Institude of Technology	1	Early Childhood Education Program	83	6	61	37	46	Normal	54	67	Moderate anxiety	20	17	Emotional suppression
2	20	2	Yanching Institude of Technology	1	Network and New Media	45	2	52	43	53	Normal	60	75	Severe anxiety	18	17	Emotional suppression
1	20	2	Yanching Institude of Technology	1	Environmental Engineering	90	60	79	36	45	Normal	41	51	Mild anxiety	4	5	Cognitive Reappraisal
2	21	2	Yanching Institude of Technology	1	Chinese Language and Literature	55	9	49	44	55	Mild depression	54	67	Moderate anxiety	20	13	Emotional suppression
2	21	1	Yanching Institude of Technology	1	Early Childhood Education	70	6	53	46	57	Mild depression	34	42	Normal	16	20	Cognitive Reappraisal
2	19	1	WENZHOU MEDICAL UNIVERSITY	2	Japanese Language and Literature	55	60	46	48	60	Mild depression	48	60	Moderate anxiety	20	18	Emotional suppression
2	19	2	WENZHOU MEDICAL UNIVERSITY	2	Japanese Language and Literature	50	8	48	50	62	Mild depression	53	66	Moderate anxiety	17	20	Cognitive Reappraisal
1	18	1	WENZHOU MEDICAL UNIVERSITY	2	Japanese Language and Literature	60	80	55	47	58	Mild depression	34	42	Normal	16	17	Cognitive Reappraisal
1	20	2	HUNAN UNIVERSITY OF ARTS AND SCIENCE	2	Software Engineering	121	1	54	44	55	Mild depression	49	61	Moderate anxiety	20	23	Cognitive Reappraisal
1	20	2	HUNAN UNIVERSITY OF ARTS AND SCIENCE	2	Software Engineering	70	60	63	33	41	Normal	38	47	Normal	16	9	Emotional suppression
1	20	2	HUNAN UNIVERSITY OF ARTS AND SCIENCE	2	Software Engineering	66	8	64	40	50	Normal	56	70	Severe anxiety	19	22	Cognitive Reappraisal
1	21	2	HUNAN UNIVERSITY OF ARTS AND SCIENCE	2	Software Engineering	75	80	66	43	53	Normal	45	56	Mild anxiety	20	21	Cognitive Reappraisal
1	20	2	HUNAN UNIVERSITY OF ARTS AND SCIENCE	2	Software Engineering	85	18	72	31	38	Normal	53	66	Moderate anxiety	19	20	Cognitive Reappraisal
1	20	2	Guangdong Polytechnic Normal University	1	Building Electricity and Intelligence	120	24	68	48	60	Mild depression	39	48	Normal	10	13	Cognitive Reappraisal
1	20	2	Guangdong Polytechnic Normal University	1	Electrical Engineering and Automation	45	15	57	49	61	Mild depression	37	46	Normal	12	13	Cognitive Reappraisal
1	18	2	Guangdong Polytechnic Normal University	1	Electrical Engineering and Automation	60	12	57	52	65	Moderate depression	53	66	Moderate anxiety	16	20	Cognitive Reappraisal
1	19	1	Guangdong Polytechnic Normal University	1	Automation	68	16	53	51	63	Moderate depression	60	75	Severe anxiety	10	13	Cognitive Reappraisal
2	19	2	Guangdong Polytechnic Normal University	1	Automation	52	16	51	45	56	Mild depression	55	68	Moderate anxiety	12	15	Cognitive Reappraisal
2	19	1	Guangdong Polytechnic Normal University	1	Business English	50	2	50	39	48	Normal	58	72	Severe anxiety	16	18	Cognitive Reappraisal
1	20	2	Guangdong Polytechnic Normal University	1	Measurement and Control Technology and Instrumentation	78	2	55	54	67	Moderate depression	53	66	Moderate anxiety	20	25	Cognitive Reappraisal
1	18	1	Guangdong Polytechnic Normal University	1	Electrical Engineering and Automation	150	1	50	46	57	Mild depression	44	55	Mild anxiety	23	27	Cognitive Reappraisal
1	20	2	Guangdong Polytechnic Normal University	2	Mechanical Design, Manufacturing, and Automation	77	1	57	52	65	Moderate depression	54	67	Moderate anxiety	16	19	Cognitive Reappraisal
1	19	1	Guangdong Polytechnic Normal University	1	Electrical Engineering and Automation	180	10	56	41	51	Normal	55	68	Moderate anxiety	28	35	Cognitive Reappraisal
2	18	2	Guangdong Polytechnic Normal University	1	English Language and Literature	43	8	65	37	46	Normal	54	67	Moderate anxiety	17	22	Cognitive Reappraisal
1	19	2	Guangdong Polytechnic Normal University	1	Electrical Engineering and Automation	57	12	67	47	58	Mild depression	49	61	Moderate anxiety	20	28	Cognitive Reappraisal
1	17	2	Guangdong Polytechnic Normal University	1	Automation	50	6	61	43	53	Normal	54	67	Moderate anxiety	11	15	Cognitive Reappraisal
1	19	2	Guangdong Polytechnic Normal University	1	Mechanical Design, Manufacturing, and Automation	75	12	49	54	67	Moderate depression	62	77	Severe anxiety	21	24	Cognitive Reappraisal
1	18	2	Guangdong Polytechnic Normal University	1	Electrical Engineering and Automation	75	18	65	27	33	Normal	59	73	Severe anxiety	26	16	Emotional suppression
1	19	1	Guangdong Polytechnic Normal University	1	Measurement and Control Technology and Instrumentation	60	3	46	49	61	Mild depression	52	65	Moderate anxiety	15	19	Cognitive Reappraisal
2	19	2	Guangdong Polytechnic Normal University	1	Automation	47	40	64	36	45	Normal	48	60	Moderate anxiety	19	10	Emotional suppression
2	19	1	Guangdong Polytechnic Normal University	1	Business English	54	32	41	49	61	Mild depression	60	75	Severe anxiety	24	23	Emotional suppression
1	20	2	Guangdong Polytechnic Normal University	1	Automation	62	8	54	51	63	Moderate depression	49	61	Moderate anxiety	19	26	Cognitive Reappraisal
1	19	2	Guangdong Polytechnic Normal University	1	Robotics Engineering	52	16	59	51	63	Moderate depression	51	63	Moderate anxiety	22	22	Cognitive Reappraisal
2	19	1	Guangdong Polytechnic Normal University	1	Japanese Language and Literature	42	75	76	50	62	Mild depression	47	58	Mild anxiety	17	21	Cognitive Reappraisal
1	18	1	Guangdong Polytechnic Normal University	1	Electrical Engineering and Automation	75	45	63	36	45	Normal	49	61	Moderate anxiety	20	21	Cognitive Reappraisal
1	19	1	Guangdong Polytechnic Normal University	1	Automation	58	60	60	42	52	Normal	44	55	Mild anxiety	21	18	Emotional suppression
2	20	2	Guangdong Polytechnic Normal University	1	Mechanical Design, Manufacturing, and Automation	45	30	64	46	57	Mild depression	54	67	Moderate anxiety	20	20	Cognitive Reappraisal
2	18	2	Guangdong Polytechnic Normal University	1	Fine Arts	80	18	60	56	70	Moderate depression	57	71	Severe anxiety	16	21	Cognitive Reappraisal
2	19	1	Guangdong Polytechnic Normal University	1	Measurement and Control Technology and Instrumentation	47	4	78	36	45	Normal	50	62	Moderate anxiety	19	15	Emotional suppression
2	18	2	Guangdong Polytechnic Normal University	1	English Language and Literature	48	12	44	49	61	Mild depression	52	65	Moderate anxiety	23	25	Cognitive Reappraisal
2	19	2	Guangdong Polytechnic Normal University	1	Fine Arts	60	24	47	65	81	Major Depressive Disorder	58	72	Severe anxiety	26	35	Cognitive Reappraisal
1	19	1	Guangdong Polytechnic Normal University	1	Electrical Engineering and Automation	55	24	70	39	48	Normal	50	62	Moderate anxiety	20	25	Cognitive Reappraisal
1	18	1	Guangdong Polytechnic Normal University	1	Mechanical Design, Manufacturing, and Automation	80	60	56	52	65	Moderate depression	53	66	Moderate anxiety	16	20	Cognitive Reappraisal
1	20	2	Guangdong Polytechnic Normal University	1	Mechanical Design, Manufacturing, and Automation	65	36	74	43	53	Normal	33	41	Normal	4	6	Cognitive Reappraisal
1	19	2	Guangdong Polytechnic Normal University	1	Electrical Engineering and Automation	67	18	48	40	50	Normal	66	82	Severe anxiety	14	14	Cognitive Reappraisal
2	18	1	Guangdong Polytechnic Normal University	1	Business English	50	24	74	36	45	Normal	50	62	Moderate anxiety	24	17	Emotional suppression
1	19	1	Guangdong Polytechnic Normal University	1	Measurement and Control Technology and Instrumentation	65	18	50	38	47	Normal	61	76	Severe anxiety	27	22	Emotional suppression
2	18	2	Guangdong Polytechnic Normal University	1	Environmental Art Design	72	12	65	42	52	Normal	58	72	Severe anxiety	24	28	Cognitive Reappraisal
1	18	2	Guangdong Polytechnic Normal University	1	Mechanical Design, Manufacturing, and Automation	75	12	60	25	31	Normal	46	57	Mild anxiety	22	17	Emotional suppression
2	18	2	Guangdong Polytechnic Normal University	1	Fashion and Apparel Design	77	1	39	63	78	Major Depressive Disorder	55	68	Moderate anxiety	18	27	Cognitive Reappraisal
1	18	1	Guangdong Polytechnic Normal University	1	Electrical Engineering and Automation	75	60	63	41	51	Normal	49	61	Moderate anxiety	22	17	Emotional suppression
1	18	1	Guangdong Polytechnic Normal University	1	Building Electricity and Intelligence	65	3	56	52	65	Moderate depression	56	70	Severe anxiety	19	23	Cognitive Reappraisal
1	18	2	Guangdong Polytechnic Normal University	1	Building Electricity and Intelligence	60	48	60	49	61	Mild depression	49	61	Moderate anxiety	19	14	Emotional suppression
1	18	2	Guangdong Polytechnic Normal University	1	Building Electricity and Intelligence	65	6	59	42	52	Normal	49	61	Moderate anxiety	20	29	Cognitive Reappraisal
1	19	2	Guangdong Polytechnic Normal University	1	Business English	54	36	54	27	33	Normal	61	76	Severe anxiety	14	18	Cognitive Reappraisal
2	19	1	Guangdong Polytechnic Normal University	1	Electrical Engineering and Automation	59	24	57	39	48	Normal	54	67	Moderate anxiety	17	14	Emotional suppression
2	21	2	Guangdong Polytechnic Normal University	1	Business English	60	24	56	36	45	Normal	45	56	Mild anxiety	19	18	Emotional suppression
2	21	1	Guangdong Polytechnic Normal University	1	English Language and Literature	59	10	64	28	35	Normal	59	73	Severe anxiety	27	22	Emotional suppression
2	18	2	Guangdong Polytechnic Normal University	1	Business English	97	6	66	31	38	Normal	57	71	Severe anxiety	20	25	Cognitive Reappraisal
2	19	1	Guangdong Polytechnic Normal University	1	Business English	50	30	55	38	47	Normal	57	71	Severe anxiety	23	24	Cognitive Reappraisal
2	19	1	Guangdong Polytechnic Normal University	1	Environmental Design	44	9	60	52	65	Moderate depression	53	66	Moderate anxiety	18	27	Cognitive Reappraisal
1	21	1	WENZHOU MEDICAL UNIVERSITY	2	Japanese Language and Literature	90	1	67	42	52	Normal	49	61	Moderate anxiety	17	15	Emotional suppression
1	20	2	Guangdong Polytechnic Normal University	1	Mechanical Design, Manufacturing, and Automation	60	40	53	37	46	Normal	46	57	Mild anxiety	20	22	Cognitive Reappraisal
1	20	2	WENZHOU MEDICAL UNIVERSITY	2	Information Management and Information Systems	74	15	62	49	61	Mild depression	74	92	Severe anxiety	9	14	Cognitive Reappraisal
1	19	2	WENZHOU MEDICAL UNIVERSITY	2	Information Management and Information Systems	52	16	59	53	66	Moderate depression	34	42	Normal	16	20	Cognitive Reappraisal
1	19	2	WENZHOU MEDICAL UNIVERSITY	2	Information Management and Information Systems	67	25	39	54	67	Moderate depression	37	46	Normal	28	23	Emotional suppression
1	20	1	WENZHOU MEDICAL UNIVERSITY	2	Information Management and Information Systems	60	24	58	49	61	Mild depression	55	68	Moderate anxiety	16	20	Cognitive Reappraisal
1	19	1	WENZHOU MEDICAL UNIVERSITY	2	Information Management and Information Systems	90	36	91	31	38	Normal	96	120	Severe anxiety	28	35	Cognitive Reappraisal
1	20	1	WENZHOU MEDICAL UNIVERSITY	2	Information Management and Information Systems	90	48	57	40	50	Normal	42	52	Mild anxiety	17	20	Cognitive Reappraisal
1	19	2	WENZHOU MEDICAL UNIVERSITY	2	Information Management and Information Systems	60	15	83	21	26	Normal	55	68	Moderate anxiety	22	11	Emotional suppression
1	19	2	WENZHOU MEDICAL UNIVERSITY	2	Information Management and Information Systems	60	4	57	49	61	Mild depression	34	42	Normal	16	20	Cognitive Reappraisal
1	18	2	WENZHOU MEDICAL UNIVERSITY	2	Information Management and Information Systems	75	12	87	28	35	Normal	46	57	Mild anxiety	28	11	Emotional suppression
1	18	2	WENZHOU MEDICAL UNIVERSITY	2	Information Management and Information Systems	55	36	78	38	47	Normal	47	58	Mild anxiety	16	20	Cognitive Reappraisal
1	20	1	WENZHOU MEDICAL UNIVERSITY	2	Information Management and Information Systems	56	2	57	51	63	Moderate depression	53	66	Moderate anxiety	16	19	Cognitive Reappraisal
2	19	1	WENZHOU MEDICAL UNIVERSITY	2	Information Management and Information Systems	56	2	60	49	61	Mild depression	39	48	Normal	5	5	Cognitive Reappraisal
2	19	2	WENZHOU MEDICAL UNIVERSITY	2	Information Management and Information Systems	45	24	56	51	63	Moderate depression	37	46	Normal	12	15	Cognitive Reappraisal
2	19	2	WENZHOU MEDICAL UNIVERSITY	2	Information Management and Information Systems	62	12	57	48	60	Mild depression	54	67	Moderate anxiety	16	20	Cognitive Reappraisal
1	18	1	WENZHOU MEDICAL UNIVERSITY	2	Information Management and Information Systems	96	16	90	27	33	Normal	52	65	Moderate anxiety	4	5	Cognitive Reappraisal
2	20	2	WENZHOU MEDICAL UNIVERSITY	2	Information Management and Information Systems	48	18	61	45	56	Mild depression	46	57	Mild anxiety	17	20	Cognitive Reappraisal
2	18	1	WENZHOU MEDICAL UNIVERSITY	2	Information Management and Information Systems	51.5	3	72	32	40	Normal	56	70	Severe anxiety	28	13	Emotional suppression
1	19	2	WENZHOU MEDICAL UNIVERSITY	2	Information Management and Information Systems	45	36	66	37	46	Normal	49	61	Moderate anxiety	19	20	Cognitive Reappraisal
2	20	2	WENZHOU MEDICAL UNIVERSITY	2	Information Management and Information Systems	70	12	62	40	50	Normal	52	65	Moderate anxiety	24	16	Emotional suppression
2	19	2	WENZHOU MEDICAL UNIVERSITY	2	Information Management and Information Systems	55	27	90	29	36	Normal	48	60	Moderate anxiety	19	14	Emotional suppression
2	19	1	WENZHOU MEDICAL UNIVERSITY	2	Information Management and Information Systems	62	27	91	27	33	Normal	52	65	Moderate anxiety	19	5	Emotional suppression
2	18	2	WENZHOU MEDICAL UNIVERSITY	2	Information Management and Information Systems	110	24	69	37	46	Normal	43	53	Mild anxiety	15	19	Cognitive Reappraisal
2	19	1	WENZHOU MEDICAL UNIVERSITY	2	Information Management and Information Systems	53	15	81	36	45	Normal	46	57	Mild anxiety	18	17	Emotional suppression
2	21	2	WENZHOU MEDICAL UNIVERSITY	2	Information Management and Information Systems	38	30	52	67	83	Major Depressive Disorder	51	63	Moderate anxiety	18	31	Cognitive Reappraisal
2	19	2	WENZHOU MEDICAL UNIVERSITY	2	Information Management and Information Systems	44.3	20	45	50	62	Mild depression	53	66	Moderate anxiety	16	20	Cognitive Reappraisal
1	18	2	WENZHOU MEDICAL UNIVERSITY	2	Information Management and Information Systems	61	32	49	46	57	Mild depression	49	61	Moderate anxiety	12	12	Cognitive Reappraisal
2	19	1	WENZHOU MEDICAL UNIVERSITY	2	Information Management and Information Systems	120	25	55	41	51	Normal	55	68	Moderate anxiety	21	18	Emotional suppression
2	18	1	WENZHOU MEDICAL UNIVERSITY	2	Information Management and Information Systems	51	9	51	43	53	Normal	48	60	Moderate anxiety	21	18	Emotional suppression
1	18	2	WENZHOU MEDICAL UNIVERSITY	2	Nursing	77	4	60	28	35	Normal	56	70	Severe anxiety	24	22	Emotional suppression
1	19	1	WENZHOU MEDICAL UNIVERSITY	2	Nursing	67	12	59	51	63	Moderate depression	55	68	Moderate anxiety	8	10	Cognitive Reappraisal
1	20	1	WENZHOU MEDICAL UNIVERSITY	2	Nursing	87.6	2	48	51	63	Moderate depression	34	42	Normal	4	5	Cognitive Reappraisal
2	19	2	WENZHOU MEDICAL UNIVERSITY	2	Nursing	45	6	72	41	51	Normal	52	65	Moderate anxiety	21	21	Cognitive Reappraisal
1	19	2	WENZHOU MEDICAL UNIVERSITY	2	Nursing	146	18	55	51	63	Moderate depression	53	66	Moderate anxiety	16	20	Cognitive Reappraisal
2	24	2	WENZHOU MEDICAL UNIVERSITY	2	Nursing	166	6	59	43	53	Normal	45	56	Mild anxiety	16	24	Cognitive Reappraisal
2	18	2	HUNAN UNIVERSITY OF ARTS AND SCIENCE	2	English Language and Literature	55	6	57	48	60	Mild depression	60	75	Severe anxiety	17	24	Cognitive Reappraisal
2	20	2	HUNAN UNIVERSITY OF ARTS AND SCIENCE	2	Electronics and Information Science and Technology	60	16	55	46	57	Mild depression	52	65	Moderate anxiety	17	19	Cognitive Reappraisal
2	19	1	HUNAN UNIVERSITY OF ARTS AND SCIENCE	2	Financial Management	46	12	56	47	58	Mild depression	59	73	Severe anxiety	19	18	Emotional suppression
2	20	1	HUNAN UNIVERSITY OF ARTS AND SCIENCE	2	Visual Communication Design	80	12	47	47	58	Mild depression	46	57	Mild anxiety	12	9	Emotional suppression
1	19	2	HUNAN UNIVERSITY OF ARTS AND SCIENCE	2	Electronics and Information Science and Technology	140	9	56	52	65	Moderate depression	53	66	Moderate anxiety	16	20	Cognitive Reappraisal
2	19	1	HUNAN UNIVERSITY OF ARTS AND SCIENCE	2	Electronics and Information Science and Technology	43	4	44	54	67	Moderate depression	68	85	Severe anxiety	19	21	Cognitive Reappraisal
1	21	1	HUNAN UNIVERSITY OF ARTS AND SCIENCE	2	Environmental Science	60	24	41	32	40	Normal	55	68	Moderate anxiety	23	19	Emotional suppression
2	18	1	HUNAN UNIVERSITY OF ARTS AND SCIENCE	2	English Education	49	16	43	50	62	Mild depression	56	70	Severe anxiety	21	18	Emotional suppression
2	21	2	WENZHOU MEDICAL UNIVERSITY	2	Nursing	45	10	62	41	51	Normal	50	62	Moderate anxiety	19	21	Cognitive Reappraisal
2	20	2	HUNAN UNIVERSITY OF ARTS AND SCIENCE	2	Electronics and Information Science and Technology	43	8	49	55	68	Moderate depression	49	61	Moderate anxiety	21	22	Cognitive Reappraisal
2	19	2	WENZHOU MEDICAL UNIVERSITY	2	Nursing	50	6	71	44	55	Mild depression	45	56	Mild anxiety	16	22	Cognitive Reappraisal
2	19	1	WENZHOU MEDICAL UNIVERSITY	2	Nursing	73	20	63	30	37	Normal	48	60	Moderate anxiety	26	11	Emotional suppression
1	21	2	HUNAN UNIVERSITY OF ARTS AND SCIENCE	2	Electronics and Information Science and Technology	85	16	59	46	57	Mild depression	49	61	Moderate anxiety	13	13	Cognitive Reappraisal
2	18	2	HUNAN UNIVERSITY OF ARTS AND SCIENCE	2	Physics	54	2	54	43	53	Normal	40	50	Normal	16	20	Cognitive Reappraisal
2	18	2	HUNAN UNIVERSITY OF ARTS AND SCIENCE	2	English Language and Literature	50	24	55	57	71	Moderate depression	64	80	Severe anxiety	13	16	Cognitive Reappraisal
1	20	1	HUNAN UNIVERSITY OF ARTS AND SCIENCE	2	Electronics and Information Science and Technology	54	8	76	41	51	Normal	42	52	Mild anxiety	12	12	Cognitive Reappraisal
2	19	2	HUNAN UNIVERSITY OF ARTS AND SCIENCE	2	Physics	45	4	65	46	57	Mild depression	44	55	Mild anxiety	22	18	Emotional suppression
2	19	2	HUNAN UNIVERSITY OF ARTS AND SCIENCE	2	English Education	52	27	70	46	57	Mild depression	60	75	Severe anxiety	22	23	Cognitive Reappraisal
2	20	2	HUNAN UNIVERSITY OF ARTS AND SCIENCE	2	Physics	65	12	63	41	51	Normal	53	66	Moderate anxiety	26	23	Emotional suppression
2	19	2	HUNAN UNIVERSITY OF ARTS AND SCIENCE	2	Financial Management	55	15	58	50	62	Mild depression	53	66	Moderate anxiety	17	16	Emotional suppression
2	21	2	HUNAN UNIVERSITY OF ARTS AND SCIENCE	2	Civil Engineering	50	2	53	47	58	Mild depression	64	80	Severe anxiety	24	26	Cognitive Reappraisal
2	19	2	HUNAN UNIVERSITY OF ARTS AND SCIENCE	2	Financial Management	47	15	54	46	57	Mild depression	48	60	Moderate anxiety	20	16	Emotional suppression
2	20	2	HUNAN UNIVERSITY OF ARTS AND SCIENCE	2	Physics	47	8	63	45	56	Mild depression	55	68	Moderate anxiety	16	14	Emotional suppression
2	20	2	HUNAN UNIVERSITY OF ARTS AND SCIENCE	2	Visual Communication Design	48	12	56	59	73	Major Depressive Disorder	47	58	Mild anxiety	17	16	Emotional suppression
2	18	2	HUNAN UNIVERSITY OF ARTS AND SCIENCE	2	Opto-Electronics	50	12	54	39	48	Normal	50	62	Moderate anxiety	21	13	Emotional suppression
2	18	1	HUNAN UNIVERSITY OF ARTS AND SCIENCE	2	English Language and Literature	50	27	50	52	65	Moderate depression	53	66	Moderate anxiety	16	19	Cognitive Reappraisal
2	19	2	HUNAN UNIVERSITY OF ARTS AND SCIENCE	2	Physics	50	6	62	37	46	Normal	59	73	Severe anxiety	21	18	Emotional suppression
2	21	2	HUNAN UNIVERSITY OF ARTS AND SCIENCE	2	Fine Arts	70	18	48	41	51	Normal	42	52	Mild anxiety	19	25	Cognitive Reappraisal
2	19	2	HUNAN UNIVERSITY OF ARTS AND SCIENCE	2	Visual Communication Design	52	24	46	53	66	Moderate depression	53	66	Moderate anxiety	15	20	Cognitive Reappraisal
2	20	1	HUNAN UNIVERSITY OF ARTS AND SCIENCE	2	Physics	60	2	47	34	42	Normal	55	68	Moderate anxiety	17	19	Cognitive Reappraisal
1	20	2	HUNAN UNIVERSITY OF ARTS AND SCIENCE	2	Physics	55	80	61	48	60	Mild depression	47	58	Mild anxiety	19	21	Cognitive Reappraisal
2	21	1	HUNAN UNIVERSITY OF ARTS AND SCIENCE	2	Visual Communication Design	48	9	48	54	67	Moderate depression	51	63	Moderate anxiety	19	24	Cognitive Reappraisal
2	19	1	HUNAN UNIVERSITY OF ARTS AND SCIENCE	2	Early Childhood Education	60	18	75	42	52	Normal	55	68	Moderate anxiety	21	13	Emotional suppression
2	22	1	HUNAN UNIVERSITY OF ARTS AND SCIENCE	2	Urban and Rural Planning	51	9	80	37	46	Normal	44	55	Mild anxiety	22	16	Emotional suppression
1	21	1	HUNAN UNIVERSITY OF ARTS AND SCIENCE	2	Electronics and Information Science and Technology	130	27	55	53	66	Moderate depression	44	55	Mild anxiety	13	21	Cognitive Reappraisal
2	21	2	HUNAN UNIVERSITY OF ARTS AND SCIENCE	2	Early Childhood Education	102	60	70	44	55	Mild depression	51	63	Moderate anxiety	24	25	Cognitive Reappraisal
2	20	2	HUNAN UNIVERSITY OF ARTS AND SCIENCE	2	Early Childhood Education	50	16	67	53	66	Moderate depression	49	61	Moderate anxiety	14	18	Cognitive Reappraisal
1	20	2	HUNAN UNIVERSITY OF ARTS AND SCIENCE	2	Electronics and Information Science and Technology	60	18	58	34	42	Normal	52	65	Moderate anxiety	18	18	Cognitive Reappraisal
2	20	2	HUNAN UNIVERSITY OF ARTS AND SCIENCE	2	Medical Laboratory Technology	45	24	54	41	51	Normal	48	60	Moderate anxiety	17	14	Emotional suppression
2	19	2	HUNAN UNIVERSITY OF ARTS AND SCIENCE	1	Physics	50	10	58	47	58	Mild depression	46	57	Mild anxiety	18	13	Emotional suppression
2	21	2	HUNAN UNIVERSITY OF ARTS AND SCIENCE	2	Physics	47	12	65	39	48	Normal	51	63	Moderate anxiety	24	14	Emotional suppression
1	19	2	HUNAN UNIVERSITY OF ARTS AND SCIENCE	2	Electronics and Information Science and Technology	58	60	50	45	56	Mild depression	64	80	Severe anxiety	10	18	Cognitive Reappraisal
2	19	2	HUNAN UNIVERSITY OF ARTS AND SCIENCE	2	Ideological and Political Education	47	12	68	32	40	Normal	50	62	Moderate anxiety	18	14	Emotional suppression
2	19	1	HUNAN UNIVERSITY OF ARTS AND SCIENCE	2	Early Childhood Education	54	8	56	49	61	Mild depression	57	71	Severe anxiety	19	19	Cognitive Reappraisal
2	19	1	HUNAN UNIVERSITY OF ARTS AND SCIENCE	2	Opto-Electronics Information Science and Engineering	43	36	66	51	63	Moderate depression	59	73	Severe anxiety	13	17	Cognitive Reappraisal
2	18	1	HUNAN UNIVERSITY OF ARTS AND SCIENCE	2	Opto-Electronics Information Science and Engineering	50	12	64	52	65	Moderate depression	63	78	Severe anxiety	22	25	Cognitive Reappraisal
1	20	2	HUNAN UNIVERSITY OF ARTS AND SCIENCE	2	Automation	90	60	51	54	67	Moderate depression	67	83	Severe anxiety	13	19	Cognitive Reappraisal
1	20	2	HUNAN UNIVERSITY OF ARTS AND SCIENCE	2	Electronics and Information Science and Technology	55	12	61	48	60	Mild depression	44	55	Mild anxiety	14	16	Cognitive Reappraisal
1	20	2	HUNAN UNIVERSITY OF ARTS AND SCIENCE	2	Automation	65	12	51	52	65	Moderate depression	53	66	Moderate anxiety	16	20	Cognitive Reappraisal
1	20	2	HUNAN UNIVERSITY OF ARTS AND SCIENCE	2	Pharmaceutical Engineering	75	100	45	51	63	Moderate depression	69	86	Severe anxiety	16	17	Cognitive Reappraisal
1	20	1	HUNAN UNIVERSITY OF ARTS AND SCIENCE	2	Automation	65	12	57	52	65	Moderate depression	53	66	Moderate anxiety	18	22	Cognitive Reappraisal
2	19	2	HUNAN UNIVERSITY OF ARTS AND SCIENCE	2	Chemistry	60	8	57	57	71	Moderate depression	67	83	Severe anxiety	17	22	Cognitive Reappraisal
1	20	2	HUNAN UNIVERSITY OF ARTS AND SCIENCE	2	Early Childhood Education	70	60	64	37	46	Normal	49	61	Moderate anxiety	18	19	Cognitive Reappraisal
2	19	2	HUNAN UNIVERSITY OF ARTS AND SCIENCE	2	Business English	65	6	60	46	57	Mild depression	70	87	Severe anxiety	17	22	Cognitive Reappraisal
1	21	1	HUNAN UNIVERSITY OF ARTS AND SCIENCE	2	Ideological and Political Education	55	60	56	53	66	Moderate depression	44	55	Mild anxiety	19	19	Cognitive Reappraisal
2	20	2	HUNAN UNIVERSITY OF ARTS AND SCIENCE	2	Musicology	70	24	63	49	61	Mild depression	52	65	Moderate anxiety	20	28	Cognitive Reappraisal
1	20	2	HUNAN UNIVERSITY OF ARTS AND SCIENCE	2	Pharmaceutical Engineering	52	60	60	47	58	Mild depression	53	66	Moderate anxiety	24	31	Cognitive Reappraisal
1	20	1	HUNAN UNIVERSITY OF ARTS AND SCIENCE	2	Mechanical Design, Manufacturing, and Automation	74	27	71	43	53	Normal	47	58	Mild anxiety	21	24	Cognitive Reappraisal
2	20	2	HUNAN UNIVERSITY OF ARTS AND SCIENCE	2	Business English	50	32	53	51	63	Moderate depression	64	80	Severe anxiety	20	18	Emotional suppression
1	20	2	HUNAN UNIVERSITY OF ARTS AND SCIENCE	2	Electrical Engineering and Automation	80	6	69	35	43	Normal	43	53	Mild anxiety	24	20	Emotional suppression
1	21	2	HUNAN UNIVERSITY OF ARTS AND SCIENCE	2	Early Childhood Education	75	36	59	40	50	Normal	52	65	Moderate anxiety	19	25	Cognitive Reappraisal
2	20	1	HUNAN UNIVERSITY OF ARTS AND SCIENCE	2	Business English	51	36	64	45	56	Mild depression	47	58	Mild anxiety	20	21	Cognitive Reappraisal
2	20	1	HUNAN UNIVERSITY OF ARTS AND SCIENCE	2	Fine Arts	45	9	61	49	61	Mild depression	48	60	Moderate anxiety	16	18	Cognitive Reappraisal
2	18	2	HUNAN UNIVERSITY OF ARTS AND SCIENCE	2	English Education	54	16	45	51	63	Moderate depression	47	58	Mild anxiety	16	23	Cognitive Reappraisal
1	20	2	HUNAN UNIVERSITY OF ARTS AND SCIENCE	2	Animation	140	48	69	39	48	Normal	47	58	Mild anxiety	18	19	Cognitive Reappraisal
2	20	1	HUNAN UNIVERSITY OF ARTS AND SCIENCE	2	Aquaculture	51.5	6	58	43	53	Normal	54	67	Moderate anxiety	21	19	Emotional suppression
2	20	2	HUNAN UNIVERSITY OF ARTS AND SCIENCE	2	Fine Arts	100	4	53	48	60	Mild depression	64	80	Severe anxiety	21	17	Emotional suppression
1	20	2	HUNAN UNIVERSITY OF ARTS AND SCIENCE	2	Musicology	60	12	55	53	66	Moderate depression	58	72	Severe anxiety	11	15	Cognitive Reappraisal
2	19	2	HUNAN UNIVERSITY OF ARTS AND SCIENCE	2	Fine Arts	50	16	48	54	67	Moderate depression	58	72	Severe anxiety	14	15	Cognitive Reappraisal
2	19	2	HUNAN UNIVERSITY OF ARTS AND SCIENCE	2	Aquaculture	54	4	50	43	53	Normal	57	71	Severe anxiety	18	17	Emotional suppression
1	21	1	HUNAN UNIVERSITY OF ARTS AND SCIENCE	2	Ideological and Political Education	55	80	54	50	62	Mild depression	59	73	Severe anxiety	11	16	Cognitive Reappraisal
2	21	2	HUNAN UNIVERSITY OF ARTS AND SCIENCE	2	Marketing	57	48	59	49	61	Mild depression	54	67	Moderate anxiety	14	17	Cognitive Reappraisal
1	21	2	HUNAN UNIVERSITY OF ARTS AND SCIENCE	2	Early Childhood Education	67	36	52	42	52	Normal	46	57	Mild anxiety	19	23	Cognitive Reappraisal
1	20	2	HUNAN UNIVERSITY OF ARTS AND SCIENCE	2	Civil Engineering and Construction	60	3	52	52	65	Moderate depression	45	56	Mild anxiety	22	19	Emotional suppression
2	19	2	HUNAN UNIVERSITY OF ARTS AND SCIENCE	2	Musicology	42	8	50	42	52	Normal	48	60	Moderate anxiety	27	16	Emotional suppression
2	20	2	HUNAN UNIVERSITY OF ARTS AND SCIENCE	2	Marketing	58	6	47	36	45	Normal	52	65	Moderate anxiety	18	18	Cognitive Reappraisal
2	20	2	HUNAN UNIVERSITY OF ARTS AND SCIENCE	2	Animation	38	2	50	57	71	Moderate depression	46	57	Mild anxiety	16	16	Cognitive Reappraisal
2	19	2	HUNAN UNIVERSITY OF ARTS AND SCIENCE	2	English Language and Literature	47	2	39	55	68	Moderate depression	64	80	Severe anxiety	23	14	Emotional suppression
2	20	2	HUNAN UNIVERSITY OF ARTS AND SCIENCE	2	Financial Engineering	45	6	53	36	45	Normal	46	57	Mild anxiety	17	12	Emotional suppression
1	21	2	HUNAN UNIVERSITY OF ARTS AND SCIENCE	2	Biological Sciences	90	24	63	37	46	Normal	56	70	Severe anxiety	24	30	Cognitive Reappraisal
2	19	2	HUNAN UNIVERSITY OF ARTS AND SCIENCE	2	English Language and Literature	47	8	59	43	53	Normal	55	68	Moderate anxiety	21	20	Emotional suppression
2	20	1	HUNAN UNIVERSITY OF ARTS AND SCIENCE	2	Business English	52	18	64	44	55	Mild depression	40	50	Normal	20	19	Emotional suppression
1	18	2	HUNAN UNIVERSITY OF ARTS AND SCIENCE	2	English Education	57	48	50	55	68	Moderate depression	47	58	Mild anxiety	19	32	Cognitive Reappraisal
1	21	2	HUNAN UNIVERSITY OF ARTS AND SCIENCE	2	Musicology	52	36	63	52	65	Moderate depression	54	67	Moderate anxiety	19	22	Cognitive Reappraisal
1	20	2	HUNAN UNIVERSITY OF ARTS AND SCIENCE	2	Electronics and Information Science and Technology	75	48	73	38	47	Normal	48	60	Moderate anxiety	20	17	Emotional suppression
1	20	2	HUNAN UNIVERSITY OF ARTS AND SCIENCE	2	Mechanical Design, Manufacturing, and Automation	66	1	72	47	58	Mild depression	46	57	Mild anxiety	24	23	Emotional suppression
1	20	2	HUNAN UNIVERSITY OF ARTS AND SCIENCE	2	Electronics and Information Science and Technology	45	6	52	41	51	Normal	45	56	Mild anxiety	19	14	Emotional suppression
2	21	2	HUNAN UNIVERSITY OF ARTS AND SCIENCE	2	Musicology	42	12	55	49	61	Mild depression	51	63	Moderate anxiety	20	19	Emotional suppression
1	19	2	HUNAN UNIVERSITY OF ARTS AND SCIENCE	2	Electronics and Information Science and Technology	60	6	44	59	73	Major Depressive Disorder	74	92	Severe anxiety	16	17	Cognitive Reappraisal
2	20	1	HUNAN UNIVERSITY OF ARTS AND SCIENCE	2	Business English	65	12	49	49	61	Mild depression	47	58	Mild anxiety	18	24	Cognitive Reappraisal
1	20	2	HUNAN UNIVERSITY OF ARTS AND SCIENCE	2	Electronics and Information Science and Technology	56	1	59	53	66	Moderate depression	68	85	Severe anxiety	14	14	Cognitive Reappraisal
1	19	2	HUNAN UNIVERSITY OF ARTS AND SCIENCE	2	Chemistry	56	24	70	43	53	Normal	38	47	Normal	4	5	Cognitive Reappraisal
2	20	1	HUNAN UNIVERSITY OF ARTS AND SCIENCE	2	Music and Dance	56	12	61	37	46	Normal	53	66	Moderate anxiety	18	18	Cognitive Reappraisal
1	20	1	HUNAN UNIVERSITY OF ARTS AND SCIENCE	2	Computer Science and Technology	65	4	61	53	66	Moderate depression	57	71	Severe anxiety	13	17	Cognitive Reappraisal
1	19	1	HUNAN UNIVERSITY OF ARTS AND SCIENCE	2	Electronics and Information Science and Technology	140	60	55	42	52	Normal	50	62	Moderate anxiety	19	18	Emotional suppression
2	20	2	HUNAN UNIVERSITY OF ARTS AND SCIENCE	2	English Language and Literature	50	36	51	55	68	Moderate depression	55	68	Moderate anxiety	18	19	Cognitive Reappraisal
2	19	2	HUNAN UNIVERSITY OF ARTS AND SCIENCE	2	Physics	53	75	62	46	57	Mild depression	47	58	Mild anxiety	16	20	Cognitive Reappraisal
2	20	2	HUNAN UNIVERSITY OF ARTS AND SCIENCE	2	Fine Arts	53	16	53	43	53	Normal	48	60	Moderate anxiety	21	17	Emotional suppression
2	19	2	HUNAN UNIVERSITY OF ARTS AND SCIENCE	2	Chemistry	60	45	58	50	62	Mild depression	43	53	Mild anxiety	11	11	Cognitive Reappraisal
2	19	1	HUNAN UNIVERSITY OF ARTS AND SCIENCE	2	Business English	51	6	54	46	57	Mild depression	50	62	Moderate anxiety	16	16	Cognitive Reappraisal
1	21	2	HUNAN UNIVERSITY OF ARTS AND SCIENCE	2	Electronics and Information Science and Technology	80	2	56	43	53	Normal	44	55	Mild anxiety	22	17	Emotional suppression
2	20	1	HUNAN UNIVERSITY OF ARTS AND SCIENCE	2	Musicology	70	4	46	46	57	Mild depression	49	61	Moderate anxiety	25	24	Emotional suppression
2	20	2	HUNAN UNIVERSITY OF ARTS AND SCIENCE	2	Electronics and Information Science and Technology	100	6	47	48	60	Mild depression	48	60	Moderate anxiety	18	23	Cognitive Reappraisal
1	18	2	HUNAN UNIVERSITY OF ARTS AND SCIENCE	2	Electronics and Information Science and Technology	80	18	61	50	62	Mild depression	67	83	Severe anxiety	17	19	Cognitive Reappraisal
1	20	1	HUNAN UNIVERSITY OF ARTS AND SCIENCE	2	Automation	70	60	69	50	62	Mild depression	52	65	Moderate anxiety	7	17	Cognitive Reappraisal
2	20	2	HUNAN UNIVERSITY OF ARTS AND SCIENCE	2	Electronics and Information Science and Technology	40	6	54	50	62	Mild depression	55	68	Moderate anxiety	16	12	Emotional suppression
1	19	2	HUNAN UNIVERSITY OF ARTS AND SCIENCE	2	Mechanical Design, Manufacturing, and Automation	79	36	39	49	61	Mild depression	58	72	Severe anxiety	15	25	Cognitive Reappraisal
2	19	2	HUNAN UNIVERSITY OF ARTS AND SCIENCE	2	Electronics and Information Science and Technology	37	2	50	54	67	Moderate depression	61	76	Severe anxiety	16	22	Cognitive Reappraisal
1	19	1	WENZHOU MEDICAL UNIVERSITY	2	Nursing	71	1	63	52	65	Moderate depression	40	50	Normal	7	8	Cognitive Reappraisal
1	19	1	HUNAN UNIVERSITY OF ARTS AND SCIENCE	2	Electronics and Information Science and Technology	80	9	52	50	62	Mild depression	49	61	Moderate anxiety	20	22	Cognitive Reappraisal
1	21	1	HUNAN UNIVERSITY OF ARTS AND SCIENCE	2	Electronics and Information Science and Technology	75	8	53	54	67	Moderate depression	55	68	Moderate anxiety	14	12	Emotional suppression
1	20	1	HUNAN UNIVERSITY OF ARTS AND SCIENCE	2	Automation	65	12	54	54	67	Moderate depression	65	81	Severe anxiety	13	18	Cognitive Reappraisal
2	19	2	HUNAN UNIVERSITY OF ARTS AND SCIENCE	2	Physics	65	8	43	55	68	Moderate depression	53	66	Moderate anxiety	19	18	Emotional suppression
1	22	2	HUNAN UNIVERSITY OF ARTS AND SCIENCE	2	Electronics and Information Science and Technology	65	4	55	51	63	Moderate depression	52	65	Moderate anxiety	17	22	Cognitive Reappraisal
2	21	2	HUNAN UNIVERSITY OF ARTS AND SCIENCE	2	Physics	70	4	67	40	50	Normal	54	67	Moderate anxiety	22	16	Emotional suppression
1	19	2	HUNAN UNIVERSITY OF ARTS AND SCIENCE	2	Electrical Engineering and Automation	51	12	75	48	60	Mild depression	43	53	Mild anxiety	7	8	Cognitive Reappraisal
1	21	2	HUNAN UNIVERSITY OF ARTS AND SCIENCE	2	Electrical Engineering and Automation	62	36	66	49	61	Mild depression	50	62	Moderate anxiety	22	19	Emotional suppression
1	20	2	HUNAN UNIVERSITY OF ARTS AND SCIENCE	2	Visual Communication Design	72	45	59	51	63	Moderate depression	58	72	Severe anxiety	13	16	Cognitive Reappraisal
1	20	2	HUNAN UNIVERSITY OF ARTS AND SCIENCE	2	Electronics and Information Science and Technology	65	12	61	42	52	Normal	44	55	Mild anxiety	17	15	Emotional suppression
1	20	2	HUNAN UNIVERSITY OF ARTS AND SCIENCE	2	Electronics and Information Science and Technology	63	16	59	44	55	Mild depression	47	58	Mild anxiety	23	20	Emotional suppression
1	20	1	HUNAN UNIVERSITY OF ARTS AND SCIENCE	2	Visual Communication Design	74	2	57	52	65	Moderate depression	48	60	Moderate anxiety	20	26	Cognitive Reappraisal
1	18	2	HUNAN UNIVERSITY OF ARTS AND SCIENCE	2	Electronics and Information Science and Technology	110	6	53	41	51	Normal	50	62	Moderate anxiety	17	22	Cognitive Reappraisal
1	20	1	HUNAN UNIVERSITY OF ARTS AND SCIENCE	2	Mechanical Design, Manufacturing, and Automation	72	27	80	43	53	Normal	46	57	Mild anxiety	20	22	Cognitive Reappraisal
1	21	2	HUNAN UNIVERSITY OF ARTS AND SCIENCE	2	Electronics and Information Science and Technology	57	36	66	43	53	Normal	45	56	Mild anxiety	16	16	Cognitive Reappraisal
2	19	2	HUNAN UNIVERSITY OF ARTS AND SCIENCE	2	English Language and Literature	45	4	57	47	58	Mild depression	63	78	Severe anxiety	11	11	Cognitive Reappraisal
1	20	2	HUNAN UNIVERSITY OF ARTS AND SCIENCE	2	Electronics and Information Science and Technology	72	32	70	37	46	Normal	37	46	Normal	20	19	Emotional suppression
1	19	1	HUNAN UNIVERSITY OF ARTS AND SCIENCE	2	Electronics and Information Science and Technology	75	32	55	45	56	Mild depression	58	72	Severe anxiety	15	18	Cognitive Reappraisal
1	21	2	HUNAN UNIVERSITY OF ARTS AND SCIENCE	2	Electronics and Information Science and Technology	60	10	63	53	66	Moderate depression	47	58	Mild anxiety	19	23	Cognitive Reappraisal
1	20	2	HUNAN UNIVERSITY OF ARTS AND SCIENCE	2	Electronics and Information Science and Technology	120	10	57	53	66	Moderate depression	53	66	Moderate anxiety	12	16	Cognitive Reappraisal
2	18	1	HUNAN UNIVERSITY OF ARTS AND SCIENCE	2	Physics	52	4	66	43	53	Normal	39	48	Normal	20	15	Emotional suppression
2	19	2	WENZHOU MEDICAL UNIVERSITY	2	Nursing	52	48	53	46	57	Mild depression	51	63	Moderate anxiety	23	15	Emotional suppression
1	22	2	HUNAN UNIVERSITY OF ARTS AND SCIENCE	2	Electronics and Information Science and Technology	135	12	61	45	56	Mild depression	55	68	Moderate anxiety	25	25	Cognitive Reappraisal
2	20	2	HUNAN UNIVERSITY OF ARTS AND SCIENCE	2	Electronics and Information Science and Technology	47	8	49	58	72	Moderate depression	58	72	Severe anxiety	19	29	Cognitive Reappraisal
1	20	1	HUNAN UNIVERSITY OF ARTS AND SCIENCE	2	Automation	65	8	61	53	66	Moderate depression	55	68	Moderate anxiety	16	20	Cognitive Reappraisal
1	20	1	HUNAN UNIVERSITY OF ARTS AND SCIENCE	2	Electronics and Information Science and Technology	70	45	57	45	56	Mild depression	52	65	Moderate anxiety	17	18	Cognitive Reappraisal
1	22	2	HUNAN UNIVERSITY OF ARTS AND SCIENCE	2	Visual Communication Design	60	12	65	44	55	Mild depression	40	50	Normal	19	25	Cognitive Reappraisal
1	20	1	HUNAN UNIVERSITY OF ARTS AND SCIENCE	2	Electronics and Information Science and Technology	70	45	58	38	47	Normal	54	67	Moderate anxiety	16	16	Cognitive Reappraisal
1	20	2	HUNAN UNIVERSITY OF ARTS AND SCIENCE	2	Primary Education	100	64	58	43	53	Normal	58	72	Severe anxiety	18	23	Cognitive Reappraisal
2	19	2	HUNAN UNIVERSITY OF ARTS AND SCIENCE	2	Foreign Languages	60	30	67	38	47	Normal	53	66	Moderate anxiety	24	27	Cognitive Reappraisal
2	19	2	HUNAN UNIVERSITY OF ARTS AND SCIENCE	2	Network Engineering	74	6	62	45	56	Mild depression	58	72	Severe anxiety	25	20	Emotional suppression
2	20	2	HUNAN UNIVERSITY OF ARTS AND SCIENCE	2	Physics	49	60	54	47	58	Mild depression	55	68	Moderate anxiety	24	16	Emotional suppression
2	19	1	HUNAN UNIVERSITY OF ARTS AND SCIENCE	2	Network Engineering	54	4	61	46	57	Mild depression	54	67	Moderate anxiety	18	21	Cognitive Reappraisal
2	21	2	HUNAN UNIVERSITY OF ARTS AND SCIENCE	2	Environmental Design	43	8	74	44	55	Mild depression	43	53	Mild anxiety	24	22	Emotional suppression
2	19	1	HUNAN UNIVERSITY OF ARTS AND SCIENCE	2	Physics	58	18	56	40	50	Normal	59	73	Severe anxiety	21	16	Emotional suppression
2	21	1	HUNAN UNIVERSITY OF ARTS AND SCIENCE	2	Environmental Design	52	80	58	54	67	Moderate depression	51	63	Moderate anxiety	19	22	Cognitive Reappraisal
1	19	1	HUNAN UNIVERSITY OF ARTS AND SCIENCE	2	Electronics and Information Science and Technology	70	32	49	45	56	Mild depression	52	65	Moderate anxiety	21	13	Emotional suppression
2	19	2	HUNAN UNIVERSITY OF ARTS AND SCIENCE	2	English Language and Literature	45	18	69	45	56	Mild depression	51	63	Moderate anxiety	18	22	Cognitive Reappraisal
2	20	2	HUNAN UNIVERSITY OF ARTS AND SCIENCE	2	Environmental Design	55	20	52	54	67	Moderate depression	62	77	Severe anxiety	18	12	Emotional suppression
1	20	2	HUNAN UNIVERSITY OF ARTS AND SCIENCE	2	Ideological and Political Education	55	48	62	38	47	Normal	52	65	Moderate anxiety	21	25	Cognitive Reappraisal
1	21	1	HUNAN UNIVERSITY OF ARTS AND SCIENCE	2	Environmental Art Design	72	6	65	54	67	Moderate depression	55	68	Moderate anxiety	20	27	Cognitive Reappraisal
2	21	2	HUNAN UNIVERSITY OF ARTS AND SCIENCE	2	Animation	56	24	73	44	55	Mild depression	51	63	Moderate anxiety	19	21	Cognitive Reappraisal
2	18	1	HUNAN UNIVERSITY OF ARTS AND SCIENCE	2	Network Engineering	45	36	55	56	70	Moderate depression	51	63	Moderate anxiety	24	26	Cognitive Reappraisal
1	18	2	HUNAN UNIVERSITY OF ARTS AND SCIENCE	2	Ideological and Political Education	78	60	61	39	48	Normal	69	86	Severe anxiety	16	18	Cognitive Reappraisal
2	20	2	HUNAN UNIVERSITY OF ARTS AND SCIENCE	2	Geographical Science	45	48	56	39	48	Normal	50	62	Moderate anxiety	17	5	Emotional suppression
2	20	2	HUNAN UNIVERSITY OF ARTS AND SCIENCE	2	Geographical Science	52	12	49	52	65	Moderate depression	44	55	Mild anxiety	17	25	Cognitive Reappraisal
2	20	1	HUNAN UNIVERSITY OF ARTS AND SCIENCE	2	Physics	70	8	52	44	55	Mild depression	45	56	Mild anxiety	19	16	Emotional suppression
2	20	2	HUNAN UNIVERSITY OF ARTS AND SCIENCE	2	Environmental Design	62.5	4	54	51	63	Moderate depression	56	70	Severe anxiety	22	25	Cognitive Reappraisal
2	19	1	HUNAN UNIVERSITY OF ARTS AND SCIENCE	2	Geographical Science	60	6	64	29	36	Normal	51	63	Moderate anxiety	23	19	Emotional suppression
2	21	2	HUNAN UNIVERSITY OF ARTS AND SCIENCE	2	Electronics and Information Science and Technology	53	18	63	38	47	Normal	49	61	Moderate anxiety	20	21	Cognitive Reappraisal
2	19	2	HUNAN UNIVERSITY OF ARTS AND SCIENCE	2	Geographical Science	42.2	8	64	32	40	Normal	55	68	Moderate anxiety	22	13	Emotional suppression
2	18	2	HUNAN UNIVERSITY OF ARTS AND SCIENCE	2	Mathematics and Applied Mathematics	47	6	60	55	68	Moderate depression	53	66	Moderate anxiety	21	25	Cognitive Reappraisal
1	19	2	HUNAN UNIVERSITY OF ARTS AND SCIENCE	2	Ideological and Political Education	90	6	56	39	48	Normal	58	72	Severe anxiety	23	20	Emotional suppression
1	20	2	HUNAN UNIVERSITY OF ARTS AND SCIENCE	2	Ideological and Political Education	80	2	56	44	55	Mild depression	51	63	Moderate anxiety	21	25	Cognitive Reappraisal
2	19	2	HUNAN UNIVERSITY OF ARTS AND SCIENCE	2	Business English	52	9	45	54	67	Moderate depression	52	65	Moderate anxiety	23	25	Cognitive Reappraisal
1	21	2	HUNAN UNIVERSITY OF ARTS AND SCIENCE	2	Geographical Science	64	12	49	52	65	Moderate depression	59	73	Severe anxiety	13	19	Cognitive Reappraisal
1	20	2	HUNAN UNIVERSITY OF ARTS AND SCIENCE	2	Geographical Science	55	16	54	52	65	Moderate depression	48	60	Moderate anxiety	19	17	Emotional suppression
1	20	1	HUNAN UNIVERSITY OF ARTS AND SCIENCE	2	Electronics and Information Science and Technology	70	24	56	56	70	Moderate depression	58	72	Severe anxiety	19	25	Cognitive Reappraisal
2	21	2	HUNAN UNIVERSITY OF ARTS AND SCIENCE	2	Geographical Science	47	4	33	67	83	Major Depressive Disorder	54	67	Moderate anxiety	16	27	Cognitive Reappraisal
2	19	2	HUNAN UNIVERSITY OF ARTS AND SCIENCE	2	Musicology	50	27	68	40	50	Normal	53	66	Moderate anxiety	22	18	Emotional suppression
1	19	1	HUNAN UNIVERSITY OF ARTS AND SCIENCE	2	Environmental Engineering	85	12	60	39	48	Normal	49	61	Moderate anxiety	24	19	Emotional suppression
1	21	2	HUNAN UNIVERSITY OF ARTS AND SCIENCE	2	Software Engineering	49	18	46	48	60	Mild depression	57	71	Severe anxiety	18	21	Cognitive Reappraisal
2	19	2	HUNAN UNIVERSITY OF ARTS AND SCIENCE	2	Hotel Management	86	16	58	44	55	Mild depression	54	67	Moderate anxiety	24	19	Emotional suppression
1	21	1	HUNAN UNIVERSITY OF ARTS AND SCIENCE	2	Telecommunications Engineering	63	64	40	48	60	Mild depression	63	78	Severe anxiety	9	25	Cognitive Reappraisal

## Sheet: Physical Activity Level Scale
3	3	3
2	2	2
1	1	5
3	3	3
3	1	2
2	4	5
3	4	2
4	3	4
4	5	2
3	2	3
1	3	2
1	2	2
4	5	5
1	2	2
2	3	4
2	4	2
4	5	3																			体育活动等级量表
1	4	3
1	2	4
2	4	5
3	3	3
3	4	4
3	3	3
1	3	3
4	4	3
2	3	3
1	2	2
4	3	3
2	2	3
1	4	3
3	1	2
3	3	5
2	2	3
2	3	3
3	3	5
2	2	5
4	5	3
1	1	1
2	2	2
1	3	3
3	5	3
2	4	3
2	5	1
3	3	3
3	4	3
1	3	5
4	3	3
4	5	3
1	3	4
3	5	4
2	3	5
4	2	2
4	5	3
1	3	3
2	2	3
1	1	4
2	1	1
5	5	5
4	4	4
1	3	2
1	4	2
5	5	3
2	1	1
3	5	2
2	2	3
4	3	3
2	2	2
3	3	3
2	2	2
5	5	3
2	3	4
2	5	5
2	4	3
1	3	4
4	5	2
4	4	2
3	3	2
2	2	2
1	1	1
1	4	3
3	5	5
4	4	3
3	5	3
2	4	2
2	3	4
2	2	4
2	3	3
1	3	2
2	5	3
2	4	3
1	2	3
1	2	3
1	5	3
2	3	3
1	2	3
4	5	3
3	5	5
4	4	1
2	5	3
1	3	3
1	2	3
1	3	2
3	3	4
3	2	2
4	3	2
2	2	3
1	2	3
2	2	2
3	2	3
1	2	2
1	2	3
1	3	3
4	5	2
1	2	2
1	1	2
3	2	2
5	4	4
1	3	1
1	1	1
4	3	2
1	1	2
1	4	4
1	2	3
2	2	3
1	1	1
1	1	2
2	2	2
3	5	2
4	4	3
1	2	2
4	5	3
4	4	2
1	3	3
1	2	3
1	3	3
1	2	2
1	2	3
1	2	3
3	3	2
3	2	3
3	4	3
3	4	3
3	2	3
3	4	3
3	2	4
2	3	2
1	2	2
1	3	2
1	1	1
1	2	2
1	2	2
1	3	3
3	3	4
2	2	2
3	3	2
2	4	2
1	2	4
4	5	4
2	5	3
3	3	2
1	1	1
2	5	3
3	3	3
3	5	4
3	3	3
1	3	3
2	5	3
4	5	4
2	2	3
2	5	3
3	5	5
1	1	1
3	5	3
4	5	3
1	3	3
1	3	3
2	5	3
1	5	3
4	5	3
4	4	3
1	3	3
1	5	3
2	4	3
1	3	2
2	3	2
5	5	4
1	4	3
2	2	3
2	3	3
1	3	2
4	3	3
3	2	3
2	4	3
3	4	2
2	5	3
1	2	2
4	3	2
3	2	4
2	2	3
1	2	3
4	5	3
1	2	4
2	3	3
3	3	5
4	3	3
2	3	3
1	4	3
1	2	5
2	3	5
1	2	5
2	3	3
2	3	3
3	5	2
2	4	2
1	1	1
4	4	2
3	5	2
4	4	3
2	3	4
1	2	2
1	3	2
1	3	3
1	2	3
1	2	5
3	3	4
3	3	4
2	4	2
1	3	3
1	1	3
3	2	3
1	3	2
1	3	3
1	2	3
1	2	2
2	4	3
1	1	2
2	1	2
1	4	3
2	3	2
2	2	5
3	5	2
4	4	2
2	4	2
1	1	1
1	2	4
1	5	3
3	4	4
2	4	3
1	1	1
1	3	4
4	2	3
3	5	3
4	5	3
5	5	4
3	4	3
3	4	4
1	2	3
2	3	4
4	4	4
1	2	1
3	4	3
1	2	3
1	2	4
3	4	4
2	2	3
1	1	1
5	2	5
1	1	1
3	5	4
3	4	4
3	4	3
2	3	4
4	5	3
3	2	5
1	2	3
2	3	3
3	4	3
3	5	3
1	3	5
4	2	4
4	4	2
3	4	4
1	2	3
3	2	4
3	2	4
3	4	3
3	2	5
3	4	3
4	4	4
3	2	5
3	3	3
1	3	3
3	5	3
3	5	3
3	4	3
1	2	2
3	5	3
4	5	4
1	1	3
1	1	3
3	3	3
3	5	3
3	4	4
1	4	3
3	4	3
1	2	5
2	2	3
3	5	1
3	5	3
1	3	1
3	4	4
3	2	4
1	3	5
3	4	3
3	4	3
4	2	1
3	5	3
3	3	4
3	5	3
1	2	3
2	2	4
2	4	3
3	2	2
1	1	3
3	5	4
1	3	2
1	3	3
2	3	3
4	4	3
4	5	3
3	3	4
4	5	4
4	3	3
3	3	4
2	5	3
1	2	5
3	4	5
3	5	3
3	3	4
3	4	4
1	1	1
1	1	2
4	5	3
4	5	4
4	5	3
1	1	1
3	2	5
3	4	2
4	4	4
1	3	2
3	5	3
1	3	3
1	4	3
3	5	2
5	3	2
3	3	3
3	3	3
1	2	2
2	2	4
3	4	3
2	1	1
2	3	3
3	2	3
2	3	2
1	3	3
2	3	3
3	4	3
4	5	4
1	1	2
4	5	3
3	2	3
2	4	2
1	1	2
4	5	2
1	1	1
1	3	2
3	4	1
4	2	2
3	3	3
1	1	3
2	2	3
2	4	4
4	3	2
1	2	4
3	4	3
2	3	3
4	3	2
4	5	4
1	3	3
2	2	3
2	2	3
3	3	4
1	3	3
4	5	3
1	2	3
4	3	2
2	3	3
1	3	3
2	2	4
3	2	3
4	5	5
1	4	5
2	2	4
2	4	3
1	2	3
2	2	4
4	5	3
4	4	4
4	5	4
2	3	4
3	5	3
2	4	2
4	4	2
2	1	4
4	5	3
2	3	3
3	5	3
4	3	2
4	5	2
2	4	3
2	3	3
1	2	3
3	5	4
3	3	3
1	2	4
1	1	2
1	4	3
4	4	3
4	5	3
1	1	3
3	3	3
3	3	3
4	5	4
3	4	3
4	5	3
1	2	5
1	5	5
3	2	3
4	4	3
3	5	3
4	5	3
3	4	4
2	2	3
2	4	3
1	4	5
3	3	2
1	5	4
1	2	2
1	1	2
3	3	3
3	4	3
3	2	2
2	3	3
3	5	4
4	5	4
1	2	5
4	2	3
5	5	2
3	5	3
4	3	3
3	5	3
3	5	2
2	3	3
2	2	2
2	2	3
1	4	3
3	3	5
2	3	3
4	5	5
1	2	2
1	1	3
1	3	3
1	3	3
2	4	3
2	2	3
2	2	3
4	5	4
4	4	2
2	2	5
1	1	1
2	4	3
3	5	2
3	2	3
4	5	3
2	2	4
2	1	3
3	3	3
4	5	3
4	5	3
1	2	4
3	2	3
3	4	5
4	3	3
1	1	3
3	2	5
1	3	2
1	1	1
3	3	2
2	2	2
1	3	2
3	3	2
5	2	1
1	3	2
4	5	3
1	3	3
5	5	5
4	4	3
4	5	4
4	4	4
3	4	3
1	3	1
3	3	3
2	3	3
4	5	3
1	3	3
4	5	3
2	4	3
2	5	3
3	3	4
1	2	3
2	2	4
4	2	2
1	4	2
1	1	2
3	1	1
1	2	1
1	3	3
1	1	1
4	5	3
1	4	4
1	2	3
4	3	3
1	3	2
2	5	3
1	1	2
2	4	3
2	3	3
2	2	3
1	3	3
1	3	3
4	3	3
1	3	3
1	3	4
3	4	3
2	4	4
1	2	3
1	2	3
2	4	4
2	4	3
4	5	3
4	5	3
5	4	3
4	5	3
4	5	3
2	4	3
2	2	3
4	3	5
4	4	3
1	1	1
4	5	4
4	5	4
4	5	4
4	4	3
5	4	3
3	4	4
3	5	4
3	5	3
3	5	5
3	3	4
5	5	4
4	5	4
4	5	5
4	4	4
1	1	1
5	5	3
3	5	4
4	5	4
3	4	3
4	3	3
3	3	2
4	5	5
1	3	3
2	3	3
4	4	2
2	3	2
1	2	2
1	3	3
1	2	1
4	5	3
2	2	3
1	2	3
3	3	4
2	3	3
1	3	3
2	2	1
1	1	1
2	4	3
2	3	3
1	2	3
2	2	3
4	4	2
2	4	4
3	2	3
2	3	4
1	3	3
2	5	3
3	5	5
2	2	2
1	3	3
1	1	2
3	4	4
2	5	3
1	1	1
2	3	3
2	1	1
4	4	3
4	4	3
4	5	4
4	5	2
4	5	4
4	5	4
3	3	3
4	5	5
4	3	4
1	2	2
1	5	5
1	2	2
1	3	3
4	4	4
4	3	3
1	3	4
2	3	2
5	5	5
1	3	2
3	3	3
1	3	2
4	5	1
1	1	3
1	2	5
1	2	2
3	4	3
2	3	2
3	4	4
4	4	3
4	4	4
3	5	5
1	5	2
3	4	2
4	4	3
4	5	3
1	3	4
3	3	2
2	4	5
1	2	2
1	4	3
2	5	3
2	4	3
4	4	3
4	5	5
1	1	4
2	2	4
1	2	2
2	2	4
2	5	4
1	1	1
3	4	3
2	3	3
2	4	2
4	3	4
1	5	2
2	4	3
1	2	3
2	2	4
4	4	3
3	2	4
2	2	5
2	4	4
2	4	3
1	1	1
2	4	4
2	1	4
2	3	4
1	3	2
3	2	2
4	5	2
2	3	3
4	3	3
3	4	4
2	3	4
2	1	1
3	3	4
2	5	4
4	5	3
1	1	4
3	3	4
2	4	4
3	3	3
2	4	3
1	5	3
4	5	4
3	3	3
2	3	3
2	4	3
1	2	3
1	2	1
1	3	1
2	3	3
2	3	3
3	4	2
1	2	2
4	5	3
1	3	2
2	3	2
1	4	3
1	3	4
1	1	3
3	3	2
1	1	3
2	2	3
1	2	3
1	3	2
2	2	3
2	3	3
2	2	2
1	4	3
2	3	2
3	3	3
2	3	3
4	4	3
3	5	4
1	2	4
4	5	3
1	3	2
4	3	3
1	2	3
2	5	3
2	4	3
2	3	3
3	5	4
4	5	3
1	1	1
1	2	3
2	5	4
3	4	3
1	1	4
2	4	3
1	2	3
4	5	3
1	2	4
1	4	3
1	2	1
1	2	4
3	3	1
1	3	2
2	2	5
1	3	2
1	2	1
3	5	4
1	3	3
1	2	3
4	5	3
2	2	2
4	4	5
1	1	1
4	5	3
1	4	2
4	5	4
2	3	3
3	4	2
4	3	4
3	5	1
1	4	3
2	2	4
2	4	2
2	1	1
2	1	1
1	1	1
1	1	1
1	2	5
2	2	2
2	2	3
1	2	3
1	4	3
2	3	3
1	1	3
2	5	4
2	4	4
2	2	2
2	2	4
5	5	3
3	5	3
4	5	3
2	5	3
2	3	3
1	2	2
1	4	3
2	3	4
3	2	4
4	5	3
3	4	3
3	2	3
2	4	3
2	3	3
2	3	2
2	2	3
1	1	1
4	5	3
1	1	3
4	4	3
1	2	3
3	4	3
2	3	4
2	4	3
1	2	5
1	2	3
2	5	3
3	1	3
1	1	1
4	2	5
1	5	3
1	4	4
1	5	5
3	2	4
3	3	4
4	4	3
1	5	3
1	2	2
2	3	2
3	3	4
1	1	2
1	1	2
3	4	2
1	4	3
1	4	4
2	3	3
1	1	3
3	3	4
2	3	2
3	3	3
3	3	3
2	3	4
1	5	3
3	5	2
1	4	5
2	4	4
1	5	5
1	3	3
1	2	2
1	3	4
1	1	2
1	2	3
3	3	2
2	3	1
1	3	2
2	4	2
3	1	4
1	3	4
1	3	3
1	2	2
3	2	4
1	4	4
1	2	5
2	2	2
1	3	2
2	2	5
2	4	2
1	1	2
3	2	4
2	2	2
1	2	2
3	3	3
2	2	3
1	3	5
1	1	2
1	3	5
2	2	2
2	3	2
1	3	4
3	3	3
1	3	2
3	2	3
4	3	2
1	1	2
5	4	4
1	3	3
2	3	3
1	3	3
3	3	3
4	5	3
2	4	2
2	3	3
2	3	4
1	2	5
2	2	3
4	5	3
1	3	4
2	2	2
3	4	3
2	3	2
3	5	4
3	2	2
1	3	4
4	5	5
2	2	3
2	2	2
5	3	4
1	3	2
4	5	3
2	4	3
4	3	5
3	3	3
4	4	2
1	2	3
4	3	3
3	3	4
1	3	3
2	2	4
3	4	4
1	2	3
1	4	1
1	3	4
2	4	2
1	2	2
4	5	4
4	4	3
4	3	3
1	1	3
4	1	2
1	2	3
1	1	2
1	2	1
1	3	2
2	3	4
2	2	2
3	2	3
4	4	3
3	4	3
4	3	4
1	1	1
1	2	3
1	4	3
1	2	3
2	2	3
1	1	1
2	4	3
4	3	1
2	1	2
4	5	3
3	4	3
5	5	3
1	4	4
3	5	3
1	2	3
1	1	2
1	2	2
2	3	1
1	3	2
3	2	3
4	5	3
1	2	3
3	4	3
1	1	2
1	1	1
1	3	3
1	2	4
2	3	2
1	2	4
1	2	2
1	2	2
2	3	2
3	4	3
3	5	3
1	3	4
2	2	4
1	2	1
1	2	3
3	3	3
4	3	3
1	2	2
4	4	2
4	4	2
1	2	5
1	2	5
1	2	2
3	4	4
3	1	4
2	2	2
2	2	2
3	3	5
2	2	3
3	3	5
4	4	4
5	3	2
1	3	2
3	4	5
1	2	2
2	2	2
2	3	3
5	4	4
4	4	2
2	3	3
4	5	1
4	3	4
1	2	3
4	2	3
3	4	3
4	5	3
4	4	3
2	3	2
2	2	2
1	2	2
1	2	3
3	2	3
1	4	2
1	2	3
1	2	3
1	1	2
1	3	3
2	2	3
2	2	4
3	2	4
1	2	2
3	3	3
2	3	2
2	3	3
4	2	2
4	4	4
1	1	2
1	3	3
2	3	3
1	1	3

## Sheet:  Self-Control Scale
5	1	1	1	5	1	5	1	1	1	1	1	1	1	1	1	1	1	1
1	1	5	1	1	5	5	5	5	5	1	5	5	5	5	5	5	5	5
4	3	3	3	3	3	3	3	3	3	3	3	3	3	3	3	3	3	3
1	4	4	4	4	2	2	2	3	2	3	2	2	2	2	2	2	2	2
5	2	1	1	3	2	3	3	2	2	2	3	2	4	4	3	2	2	2
5	1	1	1	5	1	1	1	1	1	5	1	1	1	1	1	1	1	1
1	1	1	1	1	1	1	1	1	1	1	1	3	4	4	4	4	1	1
4	1	3	4	4	2	3	4	2	3	4	3	1	5	1	3	2	1	1
5	5	1	4	5	5	4	1	1	1	3	1	1	5	1	2	3	1	2
5	2	2	2	4	4	4	2	2	4	4	4	2	4	2	2	2	2	4
4	4	2	3	4	2	3	1	3	2	4	3	3	3	3	3	4	3	2
4	3	4	2	3	4	2	3	2	2	2	2	2	3	3	3	4	3	4
2	2	1	1	1	1	1	3	1	1	1	1	1	1	1	1	1	1	1
3	3	2	2	3	3	3	2	3	3	3	4	3	4	2	3	2	1	1
1	1	1	1	4	4	1	3	1	1	4	2	1	5	1	1	2	1	1
1	3	2	4	4	2	4	4	4	4	3	3	4	3	3	3	4	3	1
3	3	3	4	3	4	3	4	3	4	2	3	4	3	3	3	4	4	1
3	3	4	4	3	3	2	2	2	3	3	4	3	3	3	5	5	5	1
2	2	2	4	3	5	2	4	2	3	3	2	2	4	2	3	2	2	4
2	2	2	3	3	4	4	4	4	2	4	3	4	3	3	4	4	4	4
3	5	5	5	3	5	5	3	5	4	2	3	5	3	4	4	4	3	5
4	3	4	1	1	1	2	5	2	2	2	2	4	4	2	4	4	2	2
4	3	4	3	3	4	2	3	4	3	2	3	3	2	3	3	2	4	3
4	3	1	4	4	5	2	4	1	2	4	2	2	2	1	1	1	1	1
3	2	4	2	3	5	2	4	1	3	4	4	4	4	4	4	4	3	3
4	2	2	2	4	2	2	2	2	2	4	2	2	4	2	3	3	2	3
3	3	3	3	3	3	3	3	3	3	3	3	3	3	3	3	3	3	3
5	3	2	3	3	3	3	3	3	3	3	3	3	3	3	3	3	3	3
4	3	3	3	3	4	3	3	3	3	3	3	3	3	3	3	3	3	2
5	3	3	3	3	3	3	3	3	3	3	3	3	3	3	3	3	3	3
1	1	1	1	3	3	1	1	1	1	1	1	1	2	1	1	1	1	1
4	4	2	2	4	2	2	4	2	1	2	2	2	2	2	2	2	2	2
4	3	3	3	3	5	5	3	3	3	3	3	3	3	3	3	3	3	3
1	1	2	1	2	4	4	4	4	3	3	4	2	3	1	2	4	2	1
5	1	1	1	5	1	1	1	1	1	5	1	1	5	1	1	1	1	1
3	3	3	3	3	3	2	4	2	4	2	4	4	3	3	2	4	3	2
4	2	1	4	4	1	1	1	1	1	4	1	1	4	1	1	1	1	4
4	4	4	4	3	4	2	3	3	3	4	3	4	3	3	3	2	1	4
3	3	1	1	4	1	1	1	1	1	2	1	1	1	1	1	1	1	1
3	2	2	2	3	2	1	2	1	2	4	2	2	4	3	2	2	1	2
3	1	2	5	3	1	1	1	4	4	3	5	4	3	4	4	1	4	1
4	1	1	2	4	2	2	2	2	2	4	4	4	4	2	2	2	2	1
1	2	4	1	2	2	1	1	3	1	2	3	4	5	1	1	1	1	1
4	3	4	5	4	3	2	2	1	1	3	4	2	4	4	2	2	2	2
4	2	2	1	5	1	2	3	1	1	1	2	3	1	3	3	1	2	3
3	3	2	2	3	4	2	4	2	2	3	2	3	3	2	3	3	2	2
3	2	2	2	3	3	2	2	2	2	3	1	1	1	1	1	1	1	4
4	1	1	1	3	1	1	1	1	1	3	1	1	3	1	1	1	1	3
5	2	2	3	2	1	1	1	3	1	3	2	1	2	4	4	2	1	1
4	4	1	1	3	2	2	2	2	2	3	2	1	4	4	2	2	1	1
5	1	2	1	4	3	2	2	2	2	4	2	2	4	3	3	1	1	1
5	4	3	4	4	3	3	4	4	3	3	4	3	5	5	4	3	4	2
3	3	4	2	3	2	2	4	2	2	3	3	4	3	3	2	2	2	3
2	2	2	2	4	2	2	1	2	2	3	2	2	4	3	2	2	2	2
4	2	2	2	4	2	2	2	1	3	3	3	4	3	2	4	2	2	2
2	2	4	3	2	4	2	3	4	2	2	2	4	2	3	3	3	3	2
1	1	1	1	1	1	1	1	1	1	1	1	1	5	1	1	1	1	1
1	1	1	1	1	5	1	1	1	1	1	1	1	1	1	1	1	1	1
5	1	5	5	5	1	1	1	1	1	5	1	1	5	1	1	1	1	1
3	3	4	3	2	5	5	3	4	4	1	3	2	3	4	2	4	2	2
3	3	3	3	3	4	3	3	3	3	3	3	3	3	3	3	3	3	3
1	4	4	1	3	3	3	3	3	3	3	3	3	3	3	3	3	3	3
5	1	3	3	3	3	3	3	3	3	3	3	3	3	3	3	3	3	3
5	2	2	1	4	3	2	2	1	1	3	2	2	4	1	2	2	3	1
2	4	4	4	3	2	3	2	3	4	2	4	3	2	4	4	3	2	2
4	2	2	2	4	2	2	2	2	2	3	2	2	3	2	2	2	2	2
3	2	3	3	2	4	4	3	3	4	3	3	3	4	4	4	3	3	2
3	3	4	4	3	4	2	4	4	5	2	4	4	2	4	4	3	2	4
4	4	4	3	4	5	3	2	3	3	3	3	3	3	3	3	3	3	3
4	2	3	3	3	3	3	3	3	3	3	3	3	3	3	3	2	2	2
3	3	1	2	3	4	3	3	1	1	3	4	1	2	3	2	2	1	1
5	1	1	1	5	5	2	4	4	4	5	4	1	2	2	2	2	2	2
4	3	2	4	4	2	4	2	4	4	2	2	2	4	4	2	4	4	1
3	3	4	4	3	4	2	4	3	2	2	4	2	3	4	2	3	2	2
4	4	3	3	4	2	2	4	3	2	3	2	2	3	2	3	4	2	3
3	3	5	3	3	5	3	3	3	3	3	3	3	3	3	3	3	3	3
3	3	4	4	3	2	3	3	2	4	3	3	3	3	3	3	3	3	3
3	2	4	3	3	5	3	4	4	5	2	4	4	2	4	4	5	2	1
1	1	1	1	1	1	1	1	1	1	1	1	1	1	1	1	1	1	1
3	4	3	3	3	4	2	2	2	2	2	3	4	2	4	2	2	2	4
3	2	2	4	4	2	2	4	2	4	4	4	2	4	4	3	2	2	4
4	2	2	2	4	2	2	4	2	2	3	3	2	3	2	3	3	2	2
3	3	2	2	2	4	1	1	4	3	3	3	4	3	3	3	3	3	3
5	5	1	1	5	1	1	1	1	1	5	1	1	5	1	1	1	1	1
4	2	1	2	3	3	3	3	2	3	3	3	3	4	3	3	3	2	3
2	1	2	1	1	1	1	3	2	4	2	2	2	4	2	2	1	1	1
4	4	4	2	4	4	4	4	3	4	3	4	4	4	3	4	4	3	1
5	2	3	4	4	5	2	2	2	2	2	2	2	2	2	2	2	2	2
4	2	4	3	3	4	1	1	1	2	4	4	2	4	4	2	2	2	3
3	3	3	1	3	2	1	2	2	2	3	2	3	4	2	2	3	1	4
3	4	4	2	4	2	4	3	2	2	2	2	4	4	2	4	4	2	2
4	4	1	2	4	5	2	4	3	2	3	4	2	4	2	1	1	2	1
4	4	4	4	4	2	2	2	2	2	3	4	2	4	4	2	2	2	1
3	3	2	2	3	2	3	2	2	2	3	3	2	3	2	3	2	2	2
2	3	5	3	3	5	3	5	2	2	2	4	4	3	4	3	3	3	4
3	3	3	3	3	4	3	3	2	3	3	4	3	3	1	1	2	1	1
5	5	5	5	5	5	5	1	5	5	5	5	1	5	1	5	1	1	1
1	1	5	1	1	5	5	5	5	5	1	5	5	5	5	3	3	2	3
3	3	3	2	3	3	2	2	2	2	3	2	2	3	2	2	2	1	1
3	3	4	2	2	3	4	4	2	4	2	4	4	2	4	2	4	2	1
3	3	3	3	3	3	3	3	3	3	3	3	3	3	3	3	3	3	3
3	3	3	3	3	3	3	3	3	3	3	3	3	3	3	3	3	3	3
4	2	4	4	3	2	2	4	2	4	3	3	3	3	3	3	3	3	3
3	3	4	4	3	4	3	4	3	4	2	4	4	3	4	2	2	4	4
3	3	4	3	3	4	3	2	2	3	3	3	3	4	3	3	3	3	2
5	4	3	4	4	3	1	1	1	2	4	4	2	4	2	2	2	2	1
3	4	4	4	4	2	4	3	4	3	3	2	3	4	3	4	2	2	3
3	3	4	2	4	4	3	1	2	2	3	3	2	3	2	3	3	2	2
4	4	4	2	4	1	4	2	2	2	3	2	4	4	4	3	4	2	1
3	4	3	3	3	3	3	2	5	3	3	2	2	2	1	3	2	3	3
3	4	4	3	2	5	3	2	2	2	2	4	4	2	4	3	2	2	2
4	3	3	3	4	4	1	4	3	2	3	4	1	4	3	3	1	1	4
1	5	5	3	3	5	5	3	5	5	5	5	3	2	4	4	4	4	4
4	3	4	5	2	4	4	5	4	2	2	2	2	4	4	2	2	1	4
3	3	3	1	2	4	1	4	1	3	2	3	3	3	1	4	1	2	3
1	3	3	4	3	3	2	3	3	4	2	4	2	3	3	3	4	3	4
3	3	4	2	4	2	1	2	2	2	4	2	3	4	2	4	2	2	1
3	1	3	4	3	4	1	4	1	1	3	1	4	3	4	1	1	1	4
2	4	4	3	1	1	3	3	3	4	2	4	4	2	4	4	3	3	4
3	4	4	4	3	4	3	4	4	4	3	4	4	3	4	4	4	3	4
4	2	2	2	3	2	1	1	1	2	3	2	2	3	1	1	2	2	2
3	3	3	4	3	2	2	4	2	3	2	3	4	3	5	3	2	2	4
3	3	3	1	5	3	4	4	4	4	1	2	1	3	1	1	3	1	5
2	2	3	2	4	1	2	2	2	2	2	2	4	2	4	2	3	1	1
2	3	3	4	3	5	2	2	4	4	2	4	3	2	4	4	3	3	2
2	3	5	5	3	3	2	3	4	2	3	3	2	3	2	3	3	3	3
2	3	3	2	5	1	2	5	2	2	4	4	3	4	2	2	4	1	1
2	4	4	4	3	3	2	2	2	2	2	4	4	2	4	4	3	3	3
4	4	2	4	3	5	2	4	2	4	2	4	2	3	4	2	2	1	2
4	3	4	3	4	2	3	4	4	2	3	3	4	4	4	2	3	2	2
4	4	3	4	3	5	3	4	3	2	2	4	3	3	4	3	2	3	2
3	3	3	4	4	2	2	2	2	2	3	4	3	4	4	2	3	2	1
3	3	3	1	3	2	2	4	4	2	3	4	2	4	1	3	3	1	2
4	3	3	2	3	3	2	3	3	2	3	3	3	3	2	3	3	2	3
3	4	4	2	3	4	3	4	2	3	3	4	4	2	2	3	2	2	4
4	3	4	2	3	4	3	2	2	2	2	2	3	3	4	2	2	2	1
3	2	4	2	3	4	2	1	2	2	1	2	2	1	4	4	2	2	4
3	3	4	4	3	5	2	2	1	2	2	3	3	2	3	2	1	1	1
3	3	3	2	3	3	4	3	2	3	3	3	3	3	3	3	2	2	2
3	4	4	3	3	2	3	4	3	4	2	4	3	2	3	4	4	3	4
3	4	5	3	3	5	2	3	3	3	2	4	4	2	3	3	3	2	1
3	4	4	3	3	3	4	4	4	4	2	4	4	3	3	3	3	2	1
2	2	2	4	3	2	2	2	2	2	3	3	2	4	4	2	2	1	4
3	4	2	4	5	4	2	2	1	2	3	4	2	3	4	3	2	4	3
2	2	4	2	2	2	1	4	4	4	2	5	2	3	4	4	1	2	4
4	4	3	1	4	4	2	4	1	1	1	2	2	5	1	2	2	1	1
2	4	2	4	3	4	3	1	4	2	1	4	2	2	4	2	4	2	4
3	3	3	4	3	4	3	3	4	3	2	3	3	3	4	4	3	3	4
1	3	4	1	3	5	5	4	4	3	2	5	3	4	3	2	4	2	2
3	3	3	3	3	3	3	3	3	3	3	3	3	3	3	3	3	3	3
2	4	4	4	2	4	3	4	2	4	3	5	3	2	5	4	4	2	5
2	4	5	4	2	4	2	1	3	2	3	4	2	3	4	2	2	3	1
3	4	3	4	3	4	3	3	3	3	3	3	3	3	3	3	3	3	3
2	3	3	3	3	3	3	3	3	3	3	3	3	3	3	3	3	3	3
3	3	3	3	3	3	3	3	3	3	3	3	3	3	3	3	3	3	2
1	5	5	5	1	5	3	4	3	3	3	4	4	3	3	3	3	4	3
4	3	3	3	4	4	2	3	3	3	3	3	2	3	3	3	4	3	2
4	4	4	4	4	4	4	4	4	4	4	4	4	4	4	4	4	4	4
5	1	1	1	5	1	1	1	1	1	1	1	1	1	1	1	2	3	3
1	5	5	5	1	5	5	5	5	5	1	5	5	1	5	5	5	5	1
3	3	3	3	3	3	3	3	3	3	3	3	3	3	3	3	3	3	3
5	1	1	1	5	1	4	1	1	1	1	3	3	1	1	1	1	1	2
3	4	4	4	3	3	3	3	3	3	3	3	3	3	3	3	3	3	4
3	3	3	3	1	3	3	4	3	3	1	4	3	3	4	4	3	3	2
3	3	3	4	2	5	2	4	2	2	1	3	2	3	4	3	4	2	1
3	1	3	4	1	4	3	5	3	4	2	4	2	4	4	4	2	3	4
3	4	4	2	2	4	4	4	3	2	3	4	3	4	4	4	4	3	2
2	4	3	4	2	4	4	4	4	4	2	4	4	3	4	4	4	4	4
3	2	2	2	4	3	2	3	3	2	4	3	3	4	2	2	2	2	2
4	4	2	2	4	4	3	2	3	2	4	2	3	2	3	2	2	2	1
5	1	2	2	2	1	1	1	3	2	4	3	3	4	4	2	3	3	1
1	4	5	4	1	5	3	2	4	4	1	5	3	2	3	3	2	3	1
3	3	2	3	3	4	2	2	3	3	3	3	3	3	3	3	3	3	3
1	4	5	5	1	5	3	4	5	4	1	5	4	3	3	3	4	4	4
5	1	1	2	5	2	2	2	3	4	3	4	2	2	3	4	2	2	1
2	4	4	4	3	4	2	2	1	4	1	5	4	2	4	3	1	1	4
5	3	4	1	3	5	2	3	3	3	3	2	2	2	2	3	2	2	2
3	3	4	4	2	2	2	4	2	3	2	2	2	3	3	2	2	2	2
3	4	5	5	1	5	5	3	4	4	1	5	4	2	5	3	5	3	5
4	2	5	5	4	5	1	4	2	2	1	5	4	2	4	3	1	3	3
3	3	3	4	3	3	3	3	2	4	3	4	5	3	3	3	3	3	1
4	2	1	3	4	1	1	1	1	2	3	2	2	4	3	2	1	1	2
4	4	1	2	3	1	3	3	1	2	2	1	3	2	2	2	2	3	3
3	3	3	3	3	4	3	4	4	4	2	4	4	3	4	4	3	3	4
3	3	2	1	3	2	1	1	2	2	3	2	2	3	2	2	3	2	1
4	2	3	2	4	2	4	2	4	2	3	3	2	4	4	2	4	2	2
4	4	2	2	4	3	2	2	2	2	3	3	2	3	3	3	3	2	2
5	2	4	3	2	4	2	4	3	2	1	3	4	2	2	3	2	2	4
4	2	2	4	4	4	1	4	4	2	4	2	4	2	4	2	2	3	4
4	2	2	4	3	4	3	2	3	4	2	3	2	4	4	4	2	2	2
4	2	2	1	3	4	2	2	4	4	2	4	4	4	2	2	2	2	2
4	3	4	4	3	2	4	3	4	4	2	4	4	3	4	4	3	2	1
2	4	5	3	2	5	3	2	2	3	1	4	3	3	4	4	2	2	3
4	2	2	3	3	2	1	3	1	2	2	2	2	2	2	2	1	2	2
4	4	3	4	4	4	2	1	1	2	2	3	2	4	4	3	1	1	2
2	4	5	3	3	5	2	4	2	2	3	4	4	4	3	2	2	1	1
3	2	4	3	4	1	1	3	3	4	2	3	4	2	4	2	3	3	1
3	3	3	3	3	3	3	3	3	3	3	3	3	3	3	3	3	1	3
2	4	3	4	4	4	3	2	4	4	3	4	4	4	4	3	4	2	4
2	3	4	5	3	2	4	5	4	4	3	3	3	3	3	4	4	3	1
4	3	4	3	4	4	3	3	3	3	3	3	3	3	3	3	3	3	3
3	3	3	3	3	4	3	3	3	3	3	3	3	3	3	3	3	3	3
4	3	2	3	3	3	3	3	3	3	3	3	3	3	3	3	3	3	3
3	3	3	3	3	3	3	3	3	3	3	3	3	3	3	3	3	3	3
3	2	2	3	4	3	3	3	3	3	3	3	3	3	3	3	3	3	3
4	2	2	2	4	2	2	1	1	1	2	3	3	4	2	2	1	3	3
3	4	4	3	2	4	5	4	4	4	2	5	4	3	4	4	2	3	2
2	4	4	4	4	4	2	4	2	2	2	4	4	2	2	4	2	1	2
5	1	1	1	4	3	1	1	1	1	4	3	3	4	2	1	1	1	1
1	5	5	5	1	5	2	2	3	2	1	5	5	1	5	4	4	3	5
4	4	2	2	4	3	2	2	2	2	4	2	2	4	2	2	2	2	2
2	2	4	3	2	4	3	2	3	4	2	4	4	2	2	3	3	2	1
2	5	4	4	3	1	4	1	5	3	2	4	1	2	4	3	5	1	1
3	3	3	4	3	2	2	3	2	3	3	3	2	3	3	2	2	2	2
5	3	3	3	3	1	1	1	1	1	4	4	1	5	3	3	1	1	1
3	3	2	3	4	4	3	3	3	2	2	4	3	4	2	3	3	3	2
2	4	3	3	4	3	3	3	4	4	2	3	4	3	4	3	3	3	3
5	2	2	1	4	2	1	1	1	1	4	2	2	4	2	2	2	2	2
5	2	2	1	4	2	2	2	2	2	3	2	2	4	1	2	2	2	1
3	3	3	2	3	2	3	2	2	2	3	4	4	3	3	2	3	2	3
3	3	3	2	2	4	3	3	3	3	2	4	1	3	2	3	3	3	1
4	4	2	1	3	2	2	4	2	2	3	4	2	4	3	3	2	2	4
3	3	4	3	3	2	2	2	1	1	3	4	3	4	2	2	1	2	1
3	2	3	2	4	3	3	3	3	3	3	4	3	4	4	3	2	2	2
3	4	4	3	4	3	3	2	4	3	3	3	4	4	3	3	1	3	1
3	3	3	4	4	3	2	1	2	3	3	3	3	3	2	3	3	2	2
3	3	3	5	3	3	2	4	3	3	2	3	1	3	4	2	1	2	2
2	4	4	2	3	2	2	3	3	3	4	4	4	4	3	4	2	2	1
4	2	4	3	3	3	2	4	2	3	3	4	4	4	2	2	4	2	2
3	3	3	4	3	3	3	3	3	3	3	3	3	3	3	3	2	3	1
3	4	4	2	3	2	2	3	2	2	2	2	2	4	2	2	2	2	2
3	2	3	2	4	2	2	2	2	2	4	2	2	4	2	2	2	2	2
3	1	1	3	4	1	1	1	1	1	4	2	2	4	2	2	2	2	2
4	2	3	3	3	3	3	4	3	3	3	3	3	3	3	3	3	3	2
5	2	2	2	4	4	1	1	2	1	4	2	2	4	3	2	1	1	1
2	4	4	4	3	3	2	2	3	4	2	4	4	3	4	3	3	3	4
3	3	1	1	4	4	4	4	4	2	4	3	4	3	3	3	3	3	4
1	1	4	4	4	4	4	4	2	3	2	3	2	4	4	3	5	1	2
2	4	4	2	4	4	2	3	2	2	2	2	2	2	3	2	2	2	2
3	4	4	3	3	2	3	2	4	3	2	4	3	3	3	4	3	2	1
4	4	3	3	4	5	2	2	2	2	3	4	4	4	3	2	2	2	3
5	3	2	2	4	2	1	2	2	1	3	4	2	4	4	2	2	2	1
3	4	4	4	3	4	3	3	4	4	2	3	4	3	4	3	2	2	2
1	1	1	1	1	1	1	1	1	1	1	1	1	1	1	1	1	1	1
2	1	1	1	1	1	2	2	2	2	3	1	3	1	5	3	3	3	2
4	2	4	4	4	4	4	4	4	4	4	4	4	4	4	4	4	4	4
1	1	1	1	1	1	1	1	1	1	4	1	1	1	1	1	1	1	1
5	1	1	1	5	1	1	1	1	1	5	1	1	5	1	1	1	1	1
1	1	1	1	1	1	1	1	2	1	1	1	1	1	1	1	1	1	1
3	3	3	3	3	3	3	3	3	3	3	3	3	4	3	3	1	2	4
4	3	2	3	3	5	2	4	1	3	2	4	3	4	3	4	2	2	1
4	1	2	2	2	2	4	4	2	2	4	4	4	2	4	3	3	2	4
3	3	3	5	3	5	3	3	1	3	3	3	3	3	3	3	3	3	4
1	2	1	1	1	1	1	1	1	1	5	5	1	4	1	3	1	1	4
2	4	4	4	2	4	4	4	4	4	2	4	4	4	3	2	2	1	2
4	3	1	1	1	1	1	1	1	1	5	1	1	5	2	2	2	2	4
1	1	3	3	4	1	2	2	4	2	3	1	3	4	3	2	2	2	2
4	3	3	4	3	4	4	5	5	4	3	4	4	3	4	4	4	4	5
4	4	4	2	4	1	4	2	4	3	1	4	2	4	4	4	5	2	2
5	2	1	1	5	1	1	1	1	1	4	1	1	5	1	1	1	1	1
5	1	1	1	5	1	1	1	1	1	4	2	1	5	1	2	1	1	1
4	4	3	4	4	2	2	2	2	2	3	2	4	4	2	2	4	2	2
4	2	4	3	4	1	3	4	3	4	4	4	2	4	2	4	3	2	2
5	2	1	1	4	2	3	4	2	4	4	2	2	3	2	2	5	2	4
3	4	3	2	3	4	2	3	2	3	2	4	3	3	4	2	4	2	2
1	1	1	4	3	5	1	1	1	1	1	1	1	1	2	4	5	2	4
3	3	3	5	2	3	4	3	4	2	3	2	2	4	2	3	2	3	4
1	1	1	1	1	1	1	1	1	1	1	1	1	1	1	1	1	1	1
5	5	1	5	5	3	3	3	3	3	3	3	3	3	3	3	3	3	3
4	3	3	3	4	3	2	2	2	3	3	4	2	4	4	2	2	2	3
5	2	1	2	3	2	1	4	1	1	4	1	1	4	3	2	1	1	1
4	3	4	3	4	3	4	3	2	4	4	3	1	4	2	3	3	4	2
4	2	4	2	4	5	4	5	2	4	4	4	2	4	4	4	4	4	1
4	2	2	2	3	2	2	2	2	2	3	2	2	4	3	3	2	2	1
4	2	4	2	4	2	4	2	4	2	3	4	4	4	2	4	3	2	4
1	2	4	3	3	4	3	5	3	3	2	3	3	4	3	3	4	2	2
4	2	4	2	4	4	4	2	2	3	4	2	2	4	2	3	2	2	1
4	4	2	3	4	3	2	2	4	2	3	4	4	3	4	4	2	2	2
3	2	2	4	4	2	2	2	3	3	3	4	3	4	3	2	2	2	1
3	3	3	3	3	2	3	4	2	3	3	5	3	3	3	2	2	2	1
4	3	4	2	3	4	2	3	2	3	3	4	3	2	2	2	2	1	1
5	1	1	1	5	1	1	1	1	1	5	1	2	5	3	2	1	1	1
4	3	3	2	4	3	3	3	3	3	4	4	3	3	3	3	3	2	1
4	4	4	4	3	2	2	3	2	4	3	2	2	4	4	2	1	1	1
2	4	4	4	2	4	3	3	4	4	2	4	4	2	4	4	4	4	2
1	4	4	4	3	4	2	2	4	3	2	4	4	2	4	4	1	1	3
3	3	3	2	4	4	2	4	3	2	4	4	3	4	3	4	2	2	4
3	3	4	4	4	4	2	2	2	2	3	2	3	3	2	2	2	2	2
2	4	4	4	3	5	3	4	2	3	1	2	4	3	2	3	1	3	5
4	2	2	3	4	2	2	2	3	2	3	2	2	4	4	2	2	1	1
3	4	3	2	4	3	4	2	3	2	2	4	3	4	3	2	3	2	2
3	3	2	1	2	5	1	1	1	1	4	3	1	3	4	2	1	1	1
1	5	5	3	3	3	5	1	5	5	1	5	4	4	2	5	5	5	5
3	3	1	4	3	4	3	2	4	2	3	3	3	3	3	3	3	3	3
5	2	2	1	1	4	2	1	1	1	4	3	3	3	3	3	4	5	3
3	4	3	3	4	4	3	4	3	3	4	4	3	5	3	2	3	2	2
3	2	3	3	3	3	3	3	3	3	3	3	3	3	3	3	3	3	3
4	3	3	4	4	4	2	3	1	2	3	4	2	2	4	4	1	2	2
5	3	3	3	4	2	2	2	2	2	2	2	3	3	3	3	3	2	1
2	4	4	2	3	5	2	3	2	1	3	4	2	4	2	3	2	2	2
3	4	4	4	4	2	3	3	3	3	2	3	3	3	3	3	2	2	2
4	2	4	2	4	4	4	2	2	2	3	4	4	3	4	2	4	2	1
5	2	2	2	4	3	1	3	2	1	3	2	2	4	2	2	2	1	2
3	4	5	4	3	4	3	4	2	4	2	3	2	3	4	2	2	3	4
3	3	4	3	3	4	2	2	2	2	1	3	4	3	2	2	2	2	2
3	3	3	4	4	4	2	2	2	2	2	2	2	3	4	2	2	4	1
1	3	5	4	3	5	5	3	5	3	1	2	2	4	5	2	1	2	5
2	4	4	4	4	2	2	4	2	2	2	4	4	4	4	4	2	2	2
2	4	4	5	4	5	4	5	4	4	2	4	3	4	4	4	4	4	4
1	5	5	4	4	5	1	1	1	1	2	3	2	2	2	2	2	2	2
2	4	4	4	2	4	4	2	4	4	1	4	4	2	4	4	2	2	4
4	2	2	3	4	2	2	3	5	2	3	2	2	4	2	2	3	2	1
5	4	2	5	5	1	1	1	1	1	5	1	1	5	1	1	1	1	1
3	2	2	2	4	3	2	2	2	2	3	2	2	4	4	2	2	2	2
4	2	2	2	4	2	2	2	4	4	2	4	4	3	3	2	2	1	1
2	5	2	2	4	5	4	2	3	4	3	3	2	4	3	4	2	2	3
1	5	5	5	3	4	1	3	3	2	2	4	3	4	3	4	2	3	5
4	2	2	4	4	4	4	4	4	4	4	4	4	4	4	4	4	4	4
4	2	1	3	5	3	3	2	1	2	4	2	2	5	4	2	3	3	4
3	3	3	2	3	2	2	1	2	2	3	3	3	3	2	3	2	2	1
3	3	3	3	3	3	3	3	3	3	3	3	3	3	3	3	3	3	3
3	3	3	3	3	3	4	2	3	4	3	3	3	3	3	3	3	3	3
3	4	3	3	4	4	4	4	4	3	3	3	3	3	4	4	4	4	4
3	3	3	3	2	2	2	3	3	3	3	3	3	3	3	2	3	3	2
3	3	2	3	3	5	2	4	2	2	2	3	4	4	4	5	2	2	2
4	1	2	4	3	4	4	2	2	4	2	4	4	4	4	4	4	1	2
5	2	5	1	5	4	1	1	4	3	4	3	3	3	3	3	1	2	4
4	2	2	1	3	3	1	2	2	2	3	2	4	4	3	2	2	2	1
3	3	2	4	4	4	2	3	3	2	3	4	3	3	4	3	2	3	2
1	3	1	4	2	1	3	1	3	4	1	3	2	4	5	4	2	2	1
4	4	4	4	3	5	4	3	3	5	3	4	4	3	5	5	2	2	4
4	3	2	1	3	1	2	2	1	2	3	1	2	4	4	2	2	2	2
2	4	5	4	2	5	3	4	4	4	2	5	5	2	4	4	4	4	4
3	2	2	4	4	4	2	1	2	2	4	2	2	2	2	2	2	2	2
3	3	2	4	1	2	4	2	4	2	4	4	4	4	4	1	1	1	1
3	3	2	2	3	3	1	2	1	3	3	4	3	3	3	2	2	2	3
3	4	4	4	3	2	2	2	4	4	2	4	4	3	4	4	3	2	4
3	3	3	3	3	3	3	3	3	3	3	3	3	3	3	3	3	3	3
3	3	4	4	3	4	3	2	2	3	2	2	3	3	3	2	3	1	1
3	1	1	1	2	4	2	1	2	1	1	1	1	4	4	4	4	2	1
4	2	1	2	4	3	2	2	3	3	4	4	3	4	4	4	3	4	2
3	4	4	4	1	5	1	1	1	1	5	5	5	5	5	5	3	3	1
2	3	3	4	3	4	2	4	3	4	2	3	2	2	4	4	2	3	2
4	3	3	4	3	5	2	4	3	4	3	4	5	2	2	2	2	3	3
4	3	4	2	3	4	2	2	2	2	2	5	3	2	2	3	2	2	2
3	4	5	4	3	3	2	2	4	3	3	4	4	3	4	4	2	1	4
2	2	3	2	3	5	2	4	2	4	2	5	4	2	4	4	3	2	1
3	2	4	3	3	4	3	3	3	2	2	4	3	3	2	2	3	3	3
3	4	3	3	3	1	1	2	2	1	3	3	4	2	4	3	1	2	1
4	3	3	2	4	2	2	1	2	2	3	4	3	3	2	4	2	1	2
3	4	4	4	3	5	3	1	4	2	2	4	4	3	3	4	2	2	3
1	4	4	4	4	4	2	3	4	4	1	4	4	2	4	3	4	3	4
3	3	2	4	2	5	2	5	5	3	3	4	2	3	4	4	2	3	4
3	4	4	3	3	2	2	2	2	1	3	4	3	3	4	3	2	2	2
4	2	2	1	4	5	1	1	2	2	4	2	2	4	2	2	2	2	2
3	2	2	4	3	4	4	3	4	2	3	4	4	3	5	2	1	3	1
3	3	2	3	3	2	4	3	3	2	3	4	3	3	4	2	2	3	1
1	4	4	5	3	2	2	1	1	2	1	1	4	1	5	2	1	1	4
3	4	4	4	2	4	2	3	2	2	2	4	3	2	4	4	1	2	2
3	3	4	5	3	2	2	4	2	2	2	2	3	3	4	2	2	2	4
1	1	1	1	1	1	1	1	1	1	1	1	1	1	1	1	1	1	3
3	3	3	3	3	3	3	3	3	3	3	3	3	3	3	3	2	3	3
2	3	4	5	5	5	2	2	3	4	3	3	4	3	3	3	5	4	1
3	3	5	1	1	1	1	4	1	1	1	1	5	1	1	1	1	1	1
2	3	4	3	3	3	3	3	3	3	3	3	3	3	3	3	3	3	3
2	4	5	4	3	4	3	3	2	3	2	4	4	2	4	4	2	3	4
4	2	2	2	4	2	2	2	2	4	4	4	3	3	3	2	2	2	2
5	5	2	1	5	5	1	3	1	1	1	1	1	1	3	3	3	3	5
3	3	3	3	3	3	3	2	2	2	3	3	3	3	3	3	3	3	3
4	3	3	3	3	5	2	2	2	2	3	4	3	3	3	3	3	3	3
4	2	2	4	4	4	2	3	2	4	4	4	2	4	4	4	2	2	2
4	2	3	3	4	5	2	4	2	2	4	4	1	5	2	3	2	2	4
5	5	4	3	4	3	2	2	2	2	4	3	3	3	3	3	3	3	3
5	1	1	1	5	1	1	1	1	1	5	1	1	5	1	1	1	1	1
4	4	4	4	3	5	3	1	5	3	3	5	4	3	3	3	3	3	3
5	1	1	1	5	1	1	1	1	1	5	1	1	5	1	1	1	1	1
3	3	4	2	3	4	2	1	1	1	4	2	4	3	2	2	2	2	1
4	4	4	2	3	4	2	2	2	2	2	4	3	2	2	2	2	2	2
4	2	2	1	4	3	2	2	3	2	4	2	2	4	2	2	2	2	2
4	2	2	2	4	2	2	2	2	2	3	2	2	4	2	2	2	2	2
4	2	2	3	1	4	1	2	1	2	4	3	3	4	3	4	3	2	4
4	2	2	3	4	2	2	2	3	3	3	3	3	4	3	2	2	2	2
5	2	2	2	5	5	1	1	1	1	5	2	1	2	2	2	1	2	2
3	4	4	3	3	3	3	3	3	3	2	4	4	2	3	3	3	2	4
4	4	3	3	3	4	2	3	3	2	3	3	3	3	3	3	2	2	3
5	1	2	1	4	1	1	1	1	1	4	2	1	4	1	1	1	1	1
3	1	2	1	4	3	1	2	1	2	5	2	2	4	2	2	3	2	2
5	1	1	2	5	1	1	2	2	2	4	3	3	4	1	3	2	1	1
4	2	1	2	4	2	2	2	2	2	4	2	2	4	2	2	2	1	2
4	3	3	3	3	5	4	4	3	3	3	5	1	4	2	2	1	3	1
4	3	2	3	3	2	2	4	2	3	2	4	3	3	4	3	4	1	3
3	3	3	3	3	4	4	3	3	3	3	3	3	4	3	3	4	2	2
1	4	3	4	4	3	2	3	3	2	3	4	2	4	3	2	2	2	2
4	4	4	4	4	4	2	2	4	4	4	4	4	4	4	4	2	4	4
4	2	5	5	1	1	5	5	2	4	3	2	1	4	4	3	4	2	2
5	1	1	4	4	4	1	2	2	2	4	2	2	4	2	2	2	2	2
5	1	1	1	5	1	1	1	1	1	5	1	1	5	1	3	1	1	1
3	3	4	4	3	5	3	2	3	5	3	2	3	3	3	3	3	3	5
3	2	2	5	3	2	3	2	4	2	3	4	3	2	4	4	4	1	1
3	4	4	4	3	5	3	3	3	3	3	4	2	3	4	3	4	2	4
2	3	2	4	3	1	2	4	4	2	3	4	4	4	4	3	2	2	4
2	4	4	4	2	3	3	4	3	2	1	5	5	2	4	3	3	2	4
1	5	4	4	2	2	4	5	2	4	2	4	4	1	4	4	2	3	4
3	3	4	3	3	3	4	4	4	3	4	1	1	5	5	1	4	3	5
5	3	4	3	3	4	3	1	1	3	3	4	2	3	2	1	2	2	4
3	2	2	3	3	2	2	2	2	2	3	4	2	2	2	2	2	2	2
4	3	3	2	4	4	1	2	4	1	2	3	2	3	2	4	1	1	1
2	4	4	4	3	2	3	4	4	4	2	4	3	4	4	3	2	2	4
4	4	3	3	2	3	2	3	4	4	4	2	3	4	3	4	3	3	2
3	4	4	4	4	2	4	5	2	3	4	4	2	3	3	3	2	2	5
5	1	1	1	5	1	1	1	1	1	5	1	1	5	1	1	1	1	1
3	4	3	1	3	4	2	1	1	1	1	2	3	2	5	3	1	1	1
3	2	4	2	4	5	3	3	2	2	4	3	2	4	2	2	2	2	2
1	5	5	5	1	5	5	4	3	4	1	5	5	1	5	5	5	1	4
4	3	3	2	3	3	3	3	3	3	3	4	3	3	4	3	2	2	1
3	4	3	2	4	2	1	2	2	2	3	4	4	3	4	2	1	1	2
4	1	3	4	2	1	4	5	5	4	2	4	4	4	4	2	3	1	4
2	4	3	4	2	2	2	2	4	4	4	4	4	2	4	2	4	2	4
3	4	4	4	3	4	4	4	4	4	2	4	4	4	4	4	3	4	2
3	3	3	3	3	4	2	4	4	2	2	4	3	3	3	2	2	2	3
2	4	4	4	3	3	2	4	3	4	2	4	4	3	4	4	4	2	4
1	5	5	5	1	5	1	1	1	1	3	5	1	3	5	5	3	3	1
2	4	5	4	2	4	3	3	2	2	2	4	4	3	4	2	3	3	4
3	5	5	3	3	5	3	3	1	1	1	3	2	3	1	1	1	1	1
4	3	2	2	4	3	2	2	2	2	3	4	3	3	2	2	2	3	1
1	4	4	4	3	5	3	4	4	4	2	3	5	2	4	4	3	1	4
4	2	2	3	4	2	3	3	2	2	4	2	2	4	2	2	3	2	2
5	4	4	2	4	4	1	3	3	4	4	4	4	2	3	4	1	2	5
2	4	3	5	3	4	2	5	5	5	3	5	5	4	5	5	4	4	5
4	3	1	1	3	5	2	3	2	2	5	3	4	4	1	3	1	1	1
3	3	3	3	4	4	3	4	3	3	3	3	3	3	3	3	3	3	3
3	3	4	1	3	2	3	3	1	1	3	4	3	3	2	2	3	1	1
4	3	2	2	4	3	2	3	2	3	3	4	2	3	3	2	2	2	1
3	4	4	4	3	4	4	4	4	4	3	4	3	2	4	4	4	4	4
2	3	3	4	4	2	2	1	4	3	2	4	4	4	4	4	2	1	3
3	3	4	4	3	3	3	3	4	2	3	4	5	3	4	3	2	2	4
3	4	3	4	4	1	1	2	4	2	4	4	2	3	3	3	4	1	3
3	3	4	4	3	3	4	4	3	4	3	3	4	3	4	4	4	4	2
3	3	4	2	4	4	4	3	4	2	3	4	3	4	4	2	4	2	2
3	3	3	3	3	4	2	3	2	2	3	4	4	2	2	2	2	2	4
3	3	4	2	3	4	3	2	4	4	2	4	2	2	2	2	2	2	2
4	4	3	1	5	2	2	1	1	3	3	4	3	4	4	2	2	2	1
3	3	4	2	2	2	2	2	2	2	2	4	3	3	2	2	2	2	1
4	3	3	4	4	1	2	4	4	2	4	4	2	4	2	2	2	2	1
4	2	4	2	4	2	3	3	3	2	4	4	2	3	2	3	2	2	2
4	3	3	4	3	5	3	3	3	3	3	2	3	3	4	3	3	3	2
4	2	2	2	4	2	1	2	2	4	3	3	3	4	5	4	1	3	2
3	4	4	4	4	2	3	2	2	4	4	4	4	2	4	4	4	2	4
4	4	4	2	3	5	2	1	2	2	2	4	3	3	2	2	2	1	1
4	3	2	3	3	4	2	4	2	3	3	3	4	2	3	2	3	3	2
3	3	2	2	3	2	2	4	2	4	3	3	2	3	2	2	4	3	4
1	4	4	4	2	4	3	4	3	4	2	4	4	2	4	4	4	3	2
3	4	3	3	4	2	3	2	2	2	2	4	2	2	4	2	3	2	1
4	3	4	3	2	3	2	1	2	2	2	4	4	3	3	4	4	2	2
4	4	2	2	4	5	2	5	2	2	4	4	4	4	4	4	4	4	4
2	3	4	3	2	4	3	3	4	4	2	4	3	3	3	3	3	2	3
4	3	3	3	4	3	2	2	2	2	3	3	3	4	3	3	3	2	2
2	3	4	4	4	4	3	1	4	2	2	2	4	4	4	2	2	1	4
1	5	5	5	5	4	5	5	5	4	5	5	5	5	5	5	5	5	5
2	3	2	3	3	3	3	3	4	3	3	2	2	3	2	2	3	2	1
2	4	3	4	5	3	4	4	2	4	3	4	4	2	4	4	4	2	1
1	4	4	4	3	2	2	1	2	2	2	4	2	2	2	2	1	1	1
3	3	3	3	2	4	2	2	2	3	3	3	3	4	2	3	3	1	1
3	3	4	4	2	3	1	1	1	2	2	3	4	4	4	3	5	3	3
2	4	4	4	3	3	2	3	2	2	3	3	3	4	3	4	2	2	2
3	4	4	4	4	4	1	1	1	1	2	2	2	2	2	2	2	2	2
5	5	5	2	5	4	1	2	3	3	3	3	3	3	3	3	3	3	3
3	2	3	2	4	2	2	4	2	2	2	4	3	4	2	2	2	2	1
4	4	3	1	4	2	2	2	2	2	4	2	2	4	4	2	2	2	1
4	2	3	2	4	3	2	2	3	3	3	4	2	4	4	3	5	3	4
2	5	4	4	3	5	2	3	2	2	3	4	2	3	3	2	2	2	1
1	5	4	5	2	5	5	5	5	5	1	5	5	1	5	5	5	5	5
3	4	3	4	2	4	3	2	2	3	2	4	4	3	2	3	3	3	1
3	3	4	4	4	3	2	3	3	4	2	4	3	2	4	3	3	2	4
3	3	4	4	4	1	2	3	1	3	2	4	3	4	4	1	1	2	4
2	3	4	4	3	4	2	4	2	4	3	4	4	2	3	4	2	3	4
4	2	2	4	5	1	3	3	3	2	4	1	2	5	4	1	2	1	3
4	2	1	4	5	2	1	2	2	1	3	2	2	4	4	2	1	1	1
3	3	4	4	3	5	1	4	2	3	2	4	5	2	2	2	1	1	1
3	3	3	3	3	3	3	3	3	3	3	3	3	3	3	3	3	2	2
2	2	3	2	3	4	4	1	1	2	2	2	3	2	2	2	2	2	2
3	2	2	3	4	3	1	2	4	2	2	4	2	5	4	1	2	1	1
3	2	4	1	3	2	2	4	4	4	2	2	3	2	4	4	4	4	5
3	2	4	3	4	4	3	5	4	4	2	4	5	3	4	4	4	3	2
4	3	2	2	3	3	2	1	1	1	2	3	2	4	3	2	1	1	1
3	3	3	1	3	1	3	1	1	2	2	2	2	3	2	3	3	2	1
3	4	4	4	3	4	2	3	2	2	2	4	4	2	2	2	2	2	4
3	4	4	4	3	5	2	2	3	3	1	4	4	3	4	2	1	1	4
4	4	3	4	4	2	2	1	5	5	2	5	1	5	4	1	5	1	4
4	2	2	3	4	1	1	1	1	1	3	1	1	5	3	1	1	1	1
2	3	3	3	3	4	3	4	4	3	2	4	4	3	3	3	3	3	2
3	3	2	4	3	4	2	4	4	4	2	3	4	2	4	3	4	3	4
4	2	2	4	5	1	4	2	1	1	5	4	1	5	4	3	1	2	4
3	5	4	4	2	5	2	4	3	3	4	4	2	4	4	2	2	2	1
4	4	2	2	4	2	2	4	2	2	2	2	2	3	4	2	2	2	3
3	3	1	3	3	3	1	5	3	3	3	3	3	3	3	3	4	3	2
3	3	3	3	3	3	3	3	4	3	3	3	4	3	3	5	3	3	3
2	2	3	3	2	4	4	4	3	4	4	4	3	4	4	4	3	2	2
3	3	3	3	3	3	3	3	3	2	2	2	2	1	3	3	2	3	4
3	3	3	3	3	3	3	3	3	3	3	3	4	5	3	2	3	1	1
3	2	3	2	4	5	3	3	3	4	4	4	3	4	2	3	3	4	3
5	1	1	1	5	1	1	1	1	1	5	1	1	5	1	1	1	1	1
4	2	4	3	3	3	3	2	2	2	2	2	2	4	4	4	3	3	3
4	4	2	2	4	3	1	3	2	2	4	2	1	4	2	2	1	1	1
5	1	1	1	5	1	1	4	3	3	5	1	1	5	1	1	1	1	1
5	5	1	5	5	5	2	5	5	5	5	5	3	5	5	5	5	2	2
3	2	3	3	3	3	3	2	3	3	3	3	3	3	3	3	3	3	3
5	1	1	5	5	1	1	1	1	1	5	5	1	5	1	1	1	1	1
4	4	3	4	4	3	3	3	3	3	3	3	3	4	3	3	3	2	2
3	4	4	4	2	3	3	4	4	4	2	4	3	2	4	3	3	2	2
3	4	5	4	4	5	3	3	4	4	3	4	4	3	4	4	3	3	3
4	2	3	1	4	4	2	4	2	2	2	4	2	4	2	3	1	1	1
3	2	2	3	3	4	2	4	3	4	3	4	4	3	2	3	4	1	2
4	3	2	4	3	5	3	4	3	4	4	4	3	3	4	4	3	2	2
3	2	3	3	4	2	2	2	3	4	3	4	2	3	4	4	3	4	1
5	1	2	3	5	5	1	2	4	3	3	4	4	4	4	4	1	3	4
2	3	2	4	3	3	3	2	3	3	3	4	4	3	4	4	3	3	2
4	3	3	4	3	4	4	4	4	4	2	4	4	4	4	4	4	3	1
3	4	5	4	2	4	3	1	3	2	2	5	3	3	4	3	2	1	3
3	2	2	4	2	4	1	1	5	1	2	4	5	5	2	4	1	1	1
2	5	4	3	4	3	4	4	3	2	2	4	4	2	4	4	3	3	4
5	1	1	5	5	1	2	2	2	2	5	5	5	4	4	2	4	3	3
2	2	2	2	3	2	2	2	2	2	2	2	2	2	2	2	2	2	2
5	5	1	1	3	5	3	2	3	3	3	3	3	3	3	3	3	1	1
4	4	4	1	4	2	2	2	2	2	2	2	2	2	2	2	2	2	2
3	4	5	4	3	3	4	2	2	2	5	3	3	3	3	3	3	2	2
3	4	4	3	4	4	1	3	4	5	3	3	2	5	3	3	2	2	1
1	1	1	1	1	1	1	1	1	1	1	1	1	1	1	1	1	1	1
3	4	2	2	4	2	2	2	2	2	4	2	2	4	2	2	2	2	2
1	1	1	1	4	5	1	1	1	1	5	1	4	5	5	5	4	2	1
3	3	2	3	2	1	1	4	1	1	1	1	2	3	1	4	2	4	3
4	2	4	2	4	4	2	2	2	1	3	3	1	4	1	2	1	1	2
3	3	4	3	3	4	4	4	4	3	3	3	3	4	4	3	3	3	3
3	5	3	1	2	5	4	4	2	3	2	4	4	4	4	4	3	2	2
2	4	4	5	2	2	3	3	3	3	3	4	3	4	3	4	3	2	2
4	2	2	2	4	2	2	2	2	2	4	2	2	4	2	2	2	2	2
5	5	1	1	5	4	1	1	1	1	5	1	1	4	1	2	2	1	1
4	3	3	2	3	4	2	2	2	2	3	3	2	4	2	2	3	2	2
1	4	3	2	3	5	2	4	2	2	2	4	4	2	3	3	3	3	2
5	1	1	1	5	3	1	1	1	1	5	1	1	5	1	1	1	1	1
3	2	4	1	2	4	2	3	2	2	3	3	4	2	3	3	2	2	2
2	4	5	3	4	5	3	4	2	4	1	4	3	4	3	2	4	4	1
3	2	3	3	4	4	2	4	1	1	3	3	2	4	2	1	2	1	1
2	4	2	2	4	4	2	4	1	4	1	4	4	4	3	1	2	2	1
3	4	4	3	3	4	3	3	4	3	3	4	4	2	4	3	2	3	1
5	1	2	1	4	4	1	2	1	1	4	2	1	4	1	1	1	1	1
3	3	3	3	4	4	4	3	3	4	4	2	2	5	1	3	3	3	3
4	3	3	3	3	3	3	3	3	3	3	3	3	3	3	3	3	3	3
4	2	2	1	4	2	2	2	2	2	4	2	2	4	2	2	2	2	2
4	2	4	4	3	2	2	2	2	2	2	2	4	2	2	2	2	2	1
5	1	1	1	5	2	2	2	2	2	5	2	1	4	2	2	2	2	2
3	4	2	2	4	4	1	2	2	4	4	4	2	4	4	2	2	2	2
3	4	2	1	3	4	2	2	2	2	4	2	2	4	2	4	2	2	2
4	2	2	3	4	3	3	1	3	2	4	4	3	4	4	4	1	3	4
3	3	3	3	3	5	3	4	3	4	4	4	3	4	3	4	4	4	2
4	3	2	3	4	2	2	2	3	2	4	4	2	3	2	1	1	2	1
4	2	1	2	4	3	2	3	2	4	2	4	2	3	4	2	4	1	1
3	2	4	4	3	2	2	2	3	2	2	3	4	4	4	4	2	2	4
3	2	3	5	5	1	1	1	1	1	1	1	5	1	2	1	1	1	5
4	2	2	3	3	2	2	2	2	2	4	2	2	4	3	3	2	2	3
4	2	2	2	4	1	3	3	3	3	3	4	2	4	4	3	2	2	1
3	2	3	3	4	1	2	1	3	2	3	2	3	4	3	3	2	2	2
3	3	2	4	4	3	4	2	1	2	1	2	2	2	4	4	4	3	4
4	3	3	3	4	2	2	2	2	2	3	2	2	4	2	2	2	2	2
4	2	2	4	4	2	2	2	2	2	4	2	2	4	2	3	2	2	1
1	1	1	1	2	1	1	1	1	1	1	1	1	1	1	1	1	1	1
4	2	3	3	5	2	1	2	1	3	3	2	2	3	2	2	2	1	2
5	3	3	3	2	3	3	3	3	3	3	3	3	3	3	3	3	3	3
4	4	1	4	3	4	3	4	4	4	3	3	4	4	4	4	5	4	3
5	1	1	4	4	1	1	4	4	4	3	3	4	5	2	4	4	4	1
4	3	3	3	3	2	3	3	2	2	3	4	3	4	3	4	2	2	2
2	4	2	3	4	4	2	4	2	2	4	4	2	4	2	2	4	2	2
4	2	1	1	4	1	1	1	1	1	4	2	1	4	2	2	2	1	2
4	4	4	4	4	5	5	3	3	3	3	3	3	3	3	3	3	3	3
3	4	3	2	3	4	2	4	2	3	2	4	4	3	3	3	3	2	2
4	4	4	4	4	5	2	2	2	2	3	2	2	4	4	2	2	2	3
5	3	4	3	4	3	1	2	1	3	3	2	2	3	4	3	2	2	1
3	3	3	3	3	2	3	3	3	2	3	3	3	4	3	3	4	2	1
3	3	4	4	4	4	2	4	3	3	3	3	3	3	3	3	3	3	3
4	2	3	3	2	3	2	2	2	2	3	2	2	3	3	3	2	2	2
5	5	1	1	5	4	1	1	1	1	5	5	1	5	1	1	1	1	1
3	3	4	4	3	4	3	4	3	3	3	3	3	3	3	3	3	3	1
3	3	2	2	2	2	1	2	2	2	2	2	2	2	2	2	1	1	1
3	3	4	4	3	2	4	4	4	4	2	4	3	3	2	2	4	2	2
3	3	2	2	2	2	1	4	3	4	2	4	4	2	4	2	2	2	1
1	4	4	4	1	4	4	2	4	4	2	4	4	2	4	4	4	2	2
4	3	1	4	4	5	1	1	1	1	4	2	2	4	4	1	1	1	1
1	5	5	5	1	5	3	3	5	3	1	5	4	2	3	3	3	4	5
1	4	4	4	3	4	4	3	4	4	2	3	3	3	4	4	3	3	4
1	1	2	2	4	1	1	2	3	1	2	2	3	4	1	2	1	1	1
4	2	2	4	4	5	2	5	2	1	5	2	1	5	1	1	1	1	1
2	3	2	4	4	1	3	2	3	4	4	1	3	5	3	3	3	3	3
3	3	4	4	3	4	2	3	2	3	3	2	4	3	4	2	4	1	2
3	3	3	3	3	3	3	3	2	2	3	3	3	2	3	3	2	2	2
3	3	3	3	3	3	3	3	3	3	3	3	3	3	3	3	3	3	3
3	3	4	2	4	2	1	1	1	1	3	4	4	4	4	5	3	2	1
4	4	2	2	3	3	3	3	2	3	3	2	3	3	2	2	3	3	3
3	4	4	4	3	5	4	2	4	4	2	4	4	4	4	4	4	4	3
4	2	2	4	3	4	4	4	4	4	3	4	2	3	4	4	4	4	4
5	1	1	1	5	1	1	1	1	1	5	1	1	5	1	1	1	1	1
4	3	1	1	3	4	2	2	2	2	4	2	2	4	3	2	2	1	1
1	1	4	1	3	4	1	2	1	1	1	3	3	2	1	1	1	1	1
2	4	4	3	2	4	3	4	3	3	2	4	3	3	3	3	4	3	4
1	5	5	3	2	5	3	3	3	2	1	4	3	3	4	3	3	3	1
3	3	2	4	3	4	3	3	2	3	3	4	3	3	4	3	2	2	2
3	4	4	3	3	5	3	4	2	3	2	2	4	4	4	2	3	2	1
5	5	1	1	5	1	1	5	1	4	4	4	1	4	4	2	1	1	1
4	4	3	3	3	4	4	2	3	3	3	4	3	4	4	3	4	3	2
3	2	2	2	3	4	2	2	2	2	3	4	2	3	2	2	2	2	2
2	3	5	1	2	4	1	5	4	2	2	4	4	3	2	2	2	2	4
1	5	5	4	2	3	3	3	2	3	2	4	4	3	3	4	2	2	1
3	4	4	3	3	4	3	4	3	3	3	4	2	3	3	4	2	3	3
1	5	5	5	2	1	1	5	5	1	1	1	1	5	4	1	5	5	4
4	2	2	1	4	3	1	1	3	3	2	2	2	4	2	3	2	1	1
4	2	4	2	4	2	4	4	4	2	4	4	4	4	4	2	4	2	2
4	1	1	1	4	3	3	1	3	1	4	1	1	4	1	1	1	1	3
3	4	2	4	4	2	2	2	2	2	3	2	2	4	4	4	2	2	2
3	3	4	4	4	2	4	2	2	3	2	4	4	4	4	4	2	2	2
3	2	2	4	4	4	2	3	2	2	4	4	2	3	4	3	2	2	4
4	4	3	3	4	4	3	3	4	2	4	4	2	4	5	4	2	4	1
3	2	2	2	3	2	1	1	1	2	4	2	2	4	4	3	2	2	2
3	3	3	3	3	3	3	3	3	3	3	3	3	3	3	3	3	3	3
3	3	3	3	3	3	3	3	2	1	1	1	1	2	1	2	1	1	1
2	1	1	1	2	1	1	1	1	1	1	1	2	1	1	1	1	1	2
3	3	3	3	3	3	3	3	3	3	3	3	3	3	3	3	3	3	3
4	3	4	2	2	2	2	2	2	2	2	2	2	2	2	2	2	2	2
3	3	3	3	3	3	3	3	3	3	3	3	3	3	3	3	3	3	3
4	2	3	4	4	3	2	4	2	1	2	2	2	2	2	3	3	3	3
2	3	2	2	3	4	4	4	4	4	3	4	4	4	4	4	4	4	2
4	2	2	4	4	4	2	3	4	4	2	4	3	4	4	2	3	3	3
3	3	3	3	3	3	3	3	3	3	3	3	3	3	3	1	3	2	2
2	4	4	3	3	4	2	2	2	4	3	3	3	3	3	3	3	1	3
5	1	1	3	5	1	1	1	1	1	5	1	1	1	1	1	1	1	1
3	3	4	3	3	4	2	5	5	3	3	4	3	3	3	4	3	3	4
3	2	2	4	4	2	1	1	1	1	3	3	2	3	2	2	2	2	2
3	3	4	4	2	4	4	3	4	3	2	4	4	3	3	4	4	2	2
4	2	3	3	4	3	2	3	4	3	3	4	4	4	4	4	4	1	4
1	5	5	4	3	4	4	4	4	4	2	4	4	3	4	4	3	3	4
4	5	4	4	1	2	4	4	2	4	2	4	4	3	4	4	4	3	4
3	3	3	3	3	3	3	3	3	3	3	3	3	3	3	3	3	1	1
2	4	3	4	4	4	3	4	4	3	4	4	3	2	4	4	2	4	2
2	4	4	4	4	3	2	2	4	2	2	4	2	3	2	2	2	3	3
4	2	2	2	4	2	2	2	2	2	4	2	2	4	2	2	2	2	2
3	3	2	4	3	1	3	2	2	1	2	4	4	2	4	2	2	3	2
4	3	2	4	4	4	3	2	2	3	3	4	4	2	3	2	3	2	4
4	4	4	2	3	4	2	2	2	2	3	2	2	2	2	2	2	2	1
3	4	4	3	4	2	3	3	4	4	3	4	3	4	4	3	3	3	4
3	3	4	2	3	1	1	1	2	1	2	4	5	3	4	2	1	1	1
3	4	3	4	3	4	2	2	2	4	2	4	4	2	4	4	2	2	2
3	2	2	2	4	4	2	3	3	3	3	3	3	4	3	3	3	3	3
3	4	4	3	4	4	2	3	3	4	2	4	4	3	4	4	2	3	4
3	4	4	4	4	3	4	5	5	5	2	4	5	2	4	4	5	4	4
4	3	4	4	4	2	4	4	3	4	2	5	4	3	4	4	4	4	2
3	4	5	2	3	4	3	2	4	3	2	4	4	2	4	4	4	4	4
4	3	4	3	2	1	2	2	2	4	2	5	2	2	2	4	2	1	1
1	1	1	1	1	1	1	1	1	1	1	1	1	5	1	1	1	1	1
3	2	2	3	4	1	2	3	3	3	3	2	2	2	2	2	2	1	2
3	4	3	4	3	2	2	2	2	2	3	4	3	4	4	4	2	2	4
1	3	3	4	4	1	5	5	4	5	3	3	3	3	3	3	3	3	4
5	5	1	2	3	1	2	3	4	4	4	4	2	4	3	2	1	2	1
5	1	1	1	5	1	1	1	1	1	5	1	1	5	2	2	2	2	1
3	3	2	3	3	4	3	4	2	2	2	2	3	4	3	2	3	3	2
5	1	1	1	5	1	1	5	1	1	5	1	1	5	2	2	2	2	2
3	3	3	3	3	3	3	3	3	3	3	3	3	3	3	3	3	3	3
1	3	5	3	3	5	3	4	4	4	2	3	4	3	3	2	5	5	5
4	3	3	3	4	4	2	2	4	2	3	3	2	3	3	3	3	2	2
3	4	4	1	3	3	2	3	3	3	2	4	3	4	3	3	4	4	3
5	1	1	5	5	1	1	1	1	1	5	1	1	5	5	1	1	1	1
3	4	3	2	4	2	4	3	3	2	3	3	4	4	3	4	3	2	3
3	3	2	3	3	4	2	2	3	2	3	3	2	3	3	3	3	2	2
3	4	4	1	4	4	2	4	2	2	3	2	1	4	2	2	3	2	1
2	2	3	3	3	3	3	3	3	3	3	3	4	3	3	3	3	2	1
4	2	1	2	4	4	2	2	2	2	4	2	2	4	2	2	2	2	2
5	2	2	3	4	2	1	2	2	1	3	2	2	3	3	1	3	1	1
4	3	4	3	3	4	3	3	3	2	3	2	3	4	4	2	2	2	2
4	4	4	2	4	4	4	4	2	2	1	4	2	4	1	1	3	1	1
4	4	1	1	4	4	1	1	1	2	3	2	2	4	2	3	1	1	1
5	1	2	2	4	2	2	2	2	2	4	4	3	4	2	3	2	3	3
3	3	4	3	3	3	5	3	4	2	4	4	1	4	1	3	2	1	1
5	1	1	1	5	1	1	1	1	1	4	2	2	4	1	1	1	2	2
3	2	3	5	4	1	2	3	3	4	2	4	3	4	5	2	2	1	4
5	2	1	1	4	2	1	3	1	1	4	1	1	4	1	1	2	1	1
3	5	3	4	3	2	2	1	3	3	2	4	3	4	2	2	1	3	1
1	5	5	5	1	3	2	5	3	2	1	3	3	4	4	3	1	4	2
3	3	3	2	3	4	3	2	3	3	4	4	1	4	4	1	3	1	1
3	2	4	2	4	2	2	2	1	3	2	4	3	4	4	2	2	2	3
3	3	4	3	2	3	3	3	3	2	2	3	2	3	2	3	4	3	2
4	4	4	2	4	4	3	2	2	2	3	2	3	4	4	4	4	3	4
4	2	2	2	4	2	2	2	2	2	4	2	2	4	2	2	2	2	2
5	5	5	5	1	5	5	5	5	5	1	1	1	1	5	5	1	4	1
4	2	4	4	3	1	3	4	3	4	3	4	4	3	4	3	2	1	1
3	3	4	2	4	2	2	2	3	3	2	2	3	2	3	2	2	2	1
4	2	2	1	4	3	3	3	2	2	4	3	2	5	4	2	2	2	1
3	3	4	4	1	5	3	3	4	5	1	4	4	2	4	4	2	2	4
5	3	5	5	3	2	2	1	4	1	5	2	3	3	5	3	4	1	5
5	1	2	1	5	1	1	1	1	1	5	2	1	4	1	2	2	1	1
3	3	3	3	3	3	2	2	2	2	3	3	2	4	3	2	2	2	2
3	3	3	2	3	4	2	2	3	2	3	4	3	3	3	2	3	3	3
4	2	3	2	3	2	3	2	4	3	2	3	4	3	3	3	3	2	3
2	2	2	2	4	1	1	1	1	1	2	2	2	4	3	2	1	2	2
3	5	4	3	4	1	3	3	5	2	3	3	3	3	3	3	3	3	3
4	4	2	2	2	4	3	4	4	4	2	4	4	4	4	5	3	2	1
3	4	4	3	3	4	3	3	3	3	3	3	3	3	3	3	3	2	2
1	4	3	4	2	2	4	5	4	4	2	4	3	4	4	4	4	4	4
3	4	4	3	3	4	4	3	3	3	3	3	3	3	3	3	3	3	3
3	3	3	3	3	3	3	3	3	3	3	3	3	3	3	3	3	3	1
3	3	3	3	3	3	3	3	3	3	3	3	3	3	3	3	3	3	3
4	3	4	2	4	4	3	2	2	2	4	3	2	4	4	4	2	2	2
3	3	4	4	4	3	3	3	3	3	3	3	3	3	3	3	3	2	2
3	3	3	3	3	3	3	3	3	3	3	3	3	3	3	3	3	3	3
2	4	4	4	3	4	4	3	5	4	1	4	4	3	4	4	4	3	3
3	4	1	3	3	3	2	2	2	2	2	2	2	3	2	2	2	3	2
4	4	2	4	4	4	2	2	2	3	2	3	2	2	2	3	4	3	1
2	1	2	3	4	1	3	4	5	1	2	4	4	4	4	4	4	4	4
3	4	4	3	2	3	2	4	3	4	3	4	3	3	4	4	2	3	1
3	3	3	4	4	1	2	3	4	2	2	2	2	5	2	4	1	1	1
5	1	1	1	5	1	1	1	4	1	5	1	5	5	5	1	1	1	1
3	4	2	3	3	4	3	3	3	3	2	3	2	3	2	3	3	3	3
3	3	3	3	3	3	3	3	2	2	3	2	2	4	3	3	2	2	2
4	2	2	2	4	2	2	4	2	2	2	2	2	4	2	2	2	2	2
3	2	2	1	4	2	4	3	4	2	2	2	2	3	2	2	4	2	2
3	2	3	3	3	3	4	4	3	3	2	4	4	3	3	3	5	2	3
3	2	3	2	3	3	1	1	1	1	3	2	3	3	1	1	1	1	1
3	4	4	4	4	2	1	3	3	3	3	3	3	3	2	2	1	2	3
2	4	4	4	4	4	2	2	5	4	2	4	4	3	4	4	4	2	2
4	2	3	2	3	2	2	4	4	2	3	3	2	3	4	4	4	2	4
4	2	3	4	5	2	3	3	2	3	3	4	3	3	4	4	4	3	1
3	3	3	3	3	3	3	4	3	3	4	3	3	4	4	3	3	2	3
3	2	2	4	3	3	3	2	3	2	2	3	3	3	4	3	2	2	1
3	3	2	4	4	4	2	4	2	3	2	4	2	2	4	4	4	2	2
3	4	4	4	2	2	4	4	4	4	2	4	4	2	4	4	4	2	2
4	3	2	3	3	4	2	2	3	1	3	3	2	3	2	3	4	1	2
4	2	4	2	3	2	2	3	2	1	3	3	3	3	4	3	3	2	1
3	3	4	4	3	5	3	4	3	3	5	4	4	3	4	3	3	2	4
3	4	4	4	2	4	2	4	2	2	2	3	3	2	2	3	2	2	1
5	1	3	5	5	2	4	2	2	2	4	3	2	5	1	1	4	2	1
4	2	4	2	2	2	2	2	2	2	4	2	2	4	2	3	2	2	2
3	4	4	2	3	2	2	2	3	2	1	2	4	2	2	2	1	2	1
2	4	4	4	2	5	2	3	3	3	2	2	3	3	3	2	2	2	4
3	3	2	1	4	2	4	2	1	1	4	4	2	4	4	2	2	2	2
1	5	5	5	1	4	3	4	3	3	1	4	4	1	5	4	5	2	5
2	4	4	4	4	4	4	4	4	4	2	4	4	2	4	4	4	4	4
3	4	5	3	3	5	3	3	4	3	2	4	3	2	3	3	4	3	1
3	4	4	4	4	4	4	4	2	4	2	4	4	2	4	2	2	2	2
3	4	4	3	3	3	2	3	2	3	3	2	4	3	4	2	2	1	2
3	3	2	3	4	2	2	1	2	4	2	4	2	4	2	2	1	1	1
3	3	4	1	3	4	4	3	1	3	2	4	4	2	1	2	4	3	1
1	5	5	5	1	5	5	5	5	5	1	5	5	1	5	5	5	5	5
2	4	4	3	2	2	2	2	3	3	3	4	3	2	4	2	2	2	1
4	3	2	4	4	4	2	2	1	1	2	4	3	4	4	1	2	3	4
2	3	4	3	2	3	3	5	3	3	2	3	3	3	3	3	2	3	1
3	3	4	3	3	2	2	2	2	2	4	4	3	3	3	3	2	2	2
3	2	3	4	4	4	2	2	4	3	4	4	2	4	3	2	2	1	1
3	2	3	3	4	4	1	2	2	3	2	4	2	2	4	3	2	3	3
3	3	4	4	3	5	5	3	4	4	3	2	2	3	4	4	4	3	3
4	4	4	2	4	2	4	4	4	2	4	2	2	4	3	2	5	2	1
4	4	5	3	2	5	2	3	3	3	1	4	4	2	4	2	1	2	2
5	1	1	1	4	1	2	1	1	2	4	2	2	4	2	2	2	2	2
2	4	4	1	3	4	2	4	4	2	3	4	2	4	4	4	4	2	4
3	3	4	3	3	4	3	3	2	3	2	4	4	2	3	3	3	3	2
3	4	5	4	3	5	4	3	3	4	2	5	4	2	4	3	3	1	4
3	4	4	4	2	4	3	3	4	4	2	4	4	3	3	4	3	3	3
3	4	4	4	3	4	3	4	2	2	3	4	3	3	3	3	3	3	3
3	3	3	4	3	4	3	4	3	4	3	3	4	3	4	4	3	2	2
3	3	3	1	3	3	3	3	3	3	3	3	1	3	1	3	3	1	1
3	3	2	4	3	1	2	2	4	3	3	4	2	3	3	4	2	3	1
4	2	3	2	4	2	3	1	2	4	3	4	2	3	3	3	2	1	2
5	2	1	1	3	5	1	4	2	2	5	2	2	4	2	2	1	2	2
4	3	4	4	4	1	2	2	2	2	2	4	2	3	4	3	2	1	1
3	3	4	2	3	1	1	3	1	2	2	2	3	2	2	3	1	1	1
3	3	3	3	3	3	3	3	3	3	3	3	3	3	3	3	3	3	3
3	3	3	3	3	3	3	3	3	3	3	3	3	3	3	3	3	3	3
2	3	4	4	2	3	3	1	1	3	3	4	4	2	4	4	4	3	3
3	3	3	3	3	3	3	3	3	3	3	4	4	4	4	4	4	4	4
3	2	3	2	4	3	3	5	5	5	4	4	4	3	3	3	4	2	4
3	4	4	5	4	5	1	5	5	5	2	4	3	5	2	4	2	2	2
2	3	4	4	2	5	3	3	2	2	2	4	4	2	4	4	2	2	4
3	3	3	3	3	3	3	3	3	3	3	3	3	3	3	3	3	3	3
2	4	4	4	3	4	2	4	3	2	2	4	3	2	4	2	2	2	1
4	2	3	2	5	2	2	2	2	2	3	3	2	2	3	3	3	3	3
4	3	4	4	3	4	1	2	2	3	3	4	3	4	4	2	1	1	1
3	5	4	4	3	2	2	2	2	2	2	4	2	3	4	2	2	2	3
2	4	5	5	2	4	2	3	3	3	3	3	4	3	4	3	4	4	4
3	2	4	2	4	2	2	2	4	2	3	4	2	3	4	2	2	1	1
2	5	5	4	3	3	3	4	4	5	3	3	4	3	3	4	2	4	4
4	3	3	3	3	4	2	4	2	3	3	4	2	4	4	3	1	1	1
3	5	4	3	3	5	5	5	4	5	2	5	2	2	3	3	3	3	4
3	3	3	3	3	3	4	4	4	3	3	3	3	3	3	3	3	3	3
4	3	4	2	4	2	2	4	4	3	3	4	3	4	3	4	3	2	1
4	3	2	1	4	2	1	1	1	1	3	3	4	4	2	1	1	1	1
3	5	5	5	4	1	4	2	2	2	3	4	2	4	4	2	3	2	2
2	4	4	2	2	2	2	2	2	2	2	4	2	4	4	2	2	2	2
4	2	1	4	4	5	2	4	3	4	4	2	4	2	1	3	2	4	1
3	4	4	3	3	3	2	3	2	2	3	3	4	3	2	3	2	2	3
4	2	2	3	4	3	2	2	2	1	3	2	2	3	1	1	1	1	1
1	4	5	4	3	2	3	4	3	4	2	5	3	2	4	4	4	3	4
3	3	4	3	3	4	4	5	4	5	4	5	4	2	3	4	4	2	1
4	2	2	2	4	2	2	2	2	2	2	2	2	4	4	2	2	2	2
5	3	3	3	3	5	3	3	3	3	2	3	3	3	3	3	3	3	3
5	3	2	2	4	2	2	2	2	2	4	2	2	4	2	2	2	2	2
3	4	3	4	3	4	4	4	4	4	3	4	3	2	4	3	2	4	4
4	3	4	3	5	3	1	2	2	1	4	3	1	4	4	1	1	1	3
2	2	4	4	3	3	1	5	4	2	4	5	4	1	4	4	4	2	4
3	3	3	2	3	2	2	1	3	2	3	4	3	3	2	3	2	1	2
3	3	4	5	4	4	1	3	3	2	2	5	2	3	3	4	4	1	2
1	5	5	5	1	5	3	5	5	4	1	5	3	3	5	3	2	1	5
3	1	4	3	5	4	1	4	3	2	2	1	4	2	4	2	2	1	3
3	3	2	3	3	4	4	3	3	4	2	3	3	3	3	2	4	2	2
5	3	5	5	3	1	4	3	4	4	3	3	3	4	3	4	3	3	1
3	4	3	2	4	2	1	2	1	3	1	4	2	4	4	4	2	4	3
3	3	3	3	4	3	3	2	3	5	3	4	4	4	4	4	2	3	4
3	4	3	4	3	3	2	2	3	3	2	4	3	2	4	4	2	2	2
3	3	4	4	3	4	3	4	3	2	2	4	3	3	4	3	2	2	2
1	2	2	4	4	2	1	2	2	2	4	4	4	3	4	4	2	1	4
4	3	4	3	2	4	2	2	2	2	4	2	2	4	4	2	2	2	2
3	4	4	4	4	2	4	3	4	4	2	4	4	3	2	2	4	2	2
4	4	2	2	3	4	2	3	2	2	3	4	3	2	4	2	3	2	1
3	3	4	3	3	5	1	1	1	1	2	3	3	3	3	2	1	1	2
2	4	4	3	2	4	1	2	1	2	1	4	3	2	4	4	2	2	4
4	1	2	3	3	2	3	3	3	3	3	3	3	3	3	3	3	3	3
5	3	3	3	3	3	3	3	3	3	3	3	3	3	3	3	3	3	3
5	5	5	5	5	5	5	5	5	5	5	5	5	5	5	5	5	5	5
3	2	2	4	2	2	2	4	4	4	2	4	4	4	3	2	2	2	4
5	1	1	5	5	1	1	1	1	1	5	1	1	5	5	1	1	1	1
1	3	2	1	3	1	2	3	2	3	3	2	3	3	3	3	3	4	4
5	5	1	1	5	1	1	1	1	1	5	1	1	5	5	1	1	1	1
4	3	3	3	3	4	3	3	3	3	3	3	3	3	3	3	3	3	3
4	1	1	2	4	1	1	1	1	1	4	1	2	4	1	1	1	1	1
5	1	1	1	4	2	1	1	1	3	4	2	3	4	2	2	2	2	1
3	3	3	3	3	3	3	3	3	3	3	3	3	3	3	3	3	3	3
4	4	4	4	2	5	2	3	2	3	3	3	3	4	4	2	2	3	1
3	3	4	3	3	3	3	3	3	3	3	3	3	3	3	3	3	3	3
3	3	2	3	3	4	3	3	3	3	3	3	3	3	3	3	3	3	3
5	1	1	1	5	1	1	2	1	1	5	1	1	5	1	1	1	1	1
3	3	3	3	3	2	3	3	3	2	3	3	3	3	3	3	3	2	2
1	1	1	3	1	4	2	1	1	2	4	3	2	4	2	2	2	1	1
4	3	3	1	3	2	4	1	3	2	3	2	2	3	4	2	2	1	1
3	4	3	3	3	2	4	3	3	2	3	4	4	3	2	2	2	1	1
5	5	1	5	5	1	2	1	1	1	5	1	1	5	1	1	1	1	1
5	1	1	1	5	1	1	1	1	1	5	1	1	5	1	1	1	1	1
3	3	4	4	2	1	3	2	2	2	4	2	2	4	2	2	3	2	2
5	2	2	2	4	2	1	1	1	1	4	4	2	4	2	1	1	1	1
5	4	5	5	2	2	1	3	4	4	1	5	5	3	4	1	4	2	4
4	5	5	1	2	5	4	2	2	3	3	5	4	2	2	4	3	2	5
3	4	4	4	3	2	4	2	4	4	2	4	4	2	4	4	4	3	2
3	3	4	4	2	4	2	4	4	4	3	4	4	3	3	4	1	2	1
1	5	5	5	1	5	3	2	2	2	1	5	5	3	3	1	1	1	4
3	2	4	4	3	4	2	2	2	2	2	4	4	2	4	2	2	2	2
4	3	3	3	3	2	3	3	3	3	3	3	3	3	3	3	3	3	3
2	5	5	3	3	4	2	4	2	4	2	4	4	3	3	3	3	3	3
3	3	3	3	5	3	1	1	3	1	2	4	3	5	2	2	2	1	1
2	4	3	3	3	3	2	4	3	3	3	3	3	3	3	3	3	3	3
3	4	3	3	3	4	2	2	2	2	2	4	4	3	3	2	2	2	3
2	4	2	2	2	2	2	4	2	3	2	2	4	3	4	4	2	2	1
3	4	3	2	3	2	2	4	4	3	3	4	2	3	3	3	4	2	3
3	3	3	4	3	4	3	2	3	3	2	4	3	3	3	3	3	3	3
2	2	4	3	3	5	4	5	4	4	2	4	2	2	2	4	5	1	3
3	3	4	2	3	4	2	2	3	3	3	3	3	3	3	3	3	3	3
3	4	4	4	3	4	3	5	4	4	1	5	5	2	4	3	2	2	4
2	4	4	5	3	5	2	4	5	5	1	4	2	2	4	4	4	4	5
2	4	4	5	2	4	3	3	4	4	1	5	3	3	5	3	4	3	5
3	3	2	1	4	2	2	3	3	3	4	4	3	3	3	3	3	2	1
3	4	4	3	3	4	3	4	2	2	2	4	4	2	4	3	3	4	3
4	1	2	3	4	3	1	3	2	1	3	2	2	3	3	3	3	2	2
1	2	2	3	3	4	1	1	1	1	2	5	4	2	4	3	1	2	1
3	3	2	2	3	3	3	2	2	3	3	3	4	4	4	2	1	4	4
2	4	5	3	2	4	2	2	2	2	2	4	4	2	2	4	2	2	2
2	5	5	3	1	2	3	2	2	2	3	5	4	4	2	1	2	4	3
4	2	2	4	4	2	2	2	2	2	4	2	2	4	2	2	2	2	2
5	3	3	2	4	4	2	2	2	2	3	4	2	2	3	2	2	2	2
4	2	2	5	5	2	3	2	3	3	3	4	2	4	3	2	3	2	2
4	4	2	4	4	2	2	2	3	4	3	4	3	4	4	4	3	2	1
3	2	2	2	5	2	4	2	4	4	2	4	2	3	3	4	2	2	4
3	4	3	4	3	4	3	3	3	3	3	4	3	3	4	4	2	3	4
3	4	4	2	4	4	2	3	3	2	2	3	3	3	4	3	2	3	4
4	2	1	1	5	1	1	3	5	3	4	4	2	4	5	3	4	4	1
3	4	4	3	3	3	3	4	4	3	3	3	3	3	3	4	2	2	1
4	3	3	2	4	3	4	5	3	3	4	4	3	4	4	3	4	3	3
3	3	3	2	3	4	4	4	4	4	3	4	4	4	3	3	3	3	3
3	3	3	3	4	2	3	2	2	2	2	4	3	3	4	4	2	2	1
2	3	4	4	2	3	4	4	4	4	3	3	4	3	3	2	4	4	4
2	4	4	4	3	4	4	3	4	4	1	4	3	2	4	4	4	2	2
2	4	5	2	2	3	2	4	2	2	2	5	4	2	4	4	2	2	4
4	2	2	4	4	4	2	3	3	3	3	4	4	3	4	4	2	2	2
3	4	4	4	3	4	3	4	3	4	2	4	4	2	4	4	3	3	2
3	2	2	1	4	1	2	1	1	1	3	4	2	4	2	2	1	2	1
5	2	1	3	4	1	2	1	1	2	3	4	1	2	2	1	1	1	1
4	4	4	3	3	4	2	3	3	4	3	4	3	3	4	2	2	2	4
4	3	1	1	4	4	2	1	2	1	3	2	2	3	2	2	4	2	1
3	4	3	2	4	2	2	2	2	2	3	2	3	3	2	2	2	2	2
4	4	3	1	3	4	2	2	2	2	2	4	4	3	3	3	2	2	2
3	4	2	3	2	4	4	3	3	3	3	4	2	3	4	4	3	3	1
4	4	4	4	2	4	2	2	2	2	2	4	3	3	4	2	2	2	4
4	4	3	2	3	4	2	2	2	2	3	4	2	4	2	2	2	2	2
3	2	4	3	2	3	3	4	4	3	1	4	4	2	4	4	2	2	2
4	2	2	2	4	2	2	2	2	2	2	4	3	2	2	2	2	2	1
4	4	3	3	3	2	4	3	4	3	2	2	3	3	4	3	4	2	2
3	3	2	3	2	2	2	3	2	2	2	2	2	2	2	2	2	2	2
3	3	3	3	5	3	2	2	1	2	3	3	4	2	3	2	3	3	2
5	5	3	4	4	4	4	4	4	3	4	3	4	4	4	5	5	3	3
3	4	2	4	3	4	3	2	4	4	3	2	3	4	4	2	2	2	2
1	4	4	4	4	2	4	4	4	4	4	4	4	4	4	4	3	3	2
3	4	4	4	4	4	4	4	4	4	1	4	4	4	3	4	4	4	4
4	4	2	3	3	4	3	2	3	3	3	4	2	3	3	3	3	3	4
3	3	3	2	3	4	3	2	4	3	3	3	3	3	3	2	2	2	4
4	3	2	4	4	2	2	4	2	2	2	4	2	2	4	4	2	2	1
3	3	4	5	3	4	2	4	1	3	3	3	3	3	4	2	2	2	4
3	3	3	4	3	4	2	4	4	4	2	3	4	3	4	2	3	2	1
2	4	4	4	3	2	2	4	2	4	2	2	2	3	2	2	2	2	1
3	3	4	4	3	5	2	3	2	3	4	5	4	2	2	2	2	2	1
4	5	2	1	4	1	2	2	2	1	4	2	2	2	2	1	2	2	2
2	4	4	4	4	4	3	4	2	2	2	4	4	2	4	4	3	2	1
4	2	3	4	4	4	2	2	2	2	3	4	2	4	3	2	2	2	2
3	3	4	4	3	2	3	2	2	3	2	4	2	3	4	2	3	2	4
4	4	3	4	4	4	1	5	2	4	3	2	2	3	4	4	1	1	1
2	3	4	2	3	3	3	2	2	2	2	2	3	3	3	2	2	2	2
3	3	4	4	3	4	4	5	4	4	3	5	4	3	4	4	3	3	4
4	2	2	4	3	4	3	1	1	2	3	3	3	4	4	2	2	2	2
3	4	4	3	3	4	3	2	2	3	2	4	3	2	2	3	2	2	1
3	4	2	3	4	4	3	4	3	4	3	4	2	3	2	2	4	5	4
3	2	3	2	2	2	3	2	4	4	3	4	3	2	2	2	3	4	3
3	4	4	4	4	3	4	3	4	4	2	4	3	3	4	4	4	3	4
4	4	4	4	1	5	4	4	3	3	2	2	4	2	3	3	4	3	1
3	4	2	4	1	5	3	3	3	4	1	4	4	2	2	1	2	3	1
3	3	4	3	3	4	2	5	3	2	2	2	3	4	2	2	4	3	1
4	4	3	4	2	5	3	3	4	3	2	4	3	4	4	2	4	2	4
3	4	4	3	3	3	2	2	2	4	1	4	3	2	4	4	2	3	3
3	3	3	4	3	5	4	4	3	3	3	4	3	3	3	4	4	3	4
2	2	4	4	2	4	4	4	4	4	3	4	4	3	4	4	2	3	4
3	4	5	4	4	5	3	3	2	2	1	3	4	2	4	3	4	2	4
3	2	4	2	3	5	4	5	4	4	1	5	4	2	4	4	5	4	2
3	2	3	3	4	2	4	3	2	5	2	4	4	4	4	4	4	2	4
3	3	4	2	3	2	2	3	3	2	3	2	3	3	3	2	2	2	2
4	4	4	2	4	5	2	2	4	2	2	4	2	4	2	2	2	2	4
3	2	2	3	4	2	2	5	1	2	4	3	2	1	4	4	4	1	1
3	4	2	4	4	1	4	1	5	4	3	5	5	3	5	4	4	3	4
3	3	3	3	4	3	4	3	2	3	3	3	3	3	2	2	2	2	2
4	2	2	2	4	2	2	2	2	2	4	2	2	4	2	3	2	2	2
4	3	3	3	4	4	1	2	1	2	3	3	1	3	3	2	1	1	2
3	4	4	4	4	4	4	1	4	4	2	4	4	3	4	4	2	3	2
3	4	2	2	4	4	3	3	4	3	3	4	4	3	3	2	2	2	4
1	1	2	2	2	2	2	5	4	3	3	3	4	2	5	5	5	4	5
2	4	4	4	4	2	3	1	2	4	2	5	4	2	4	5	5	1	5
1	1	3	3	3	4	3	3	3	3	3	3	3	3	2	2	3	3	2
4	2	2	4	4	2	2	4	2	3	4	3	2	4	4	2	2	2	2
3	2	3	3	2	4	2	3	2	2	2	4	2	3	4	2	2	2	2
3	3	2	2	4	3	2	3	3	2	3	1	1	2	3	5	4	3	2
4	4	4	2	3	5	3	4	4	2	2	2	2	4	4	2	2	2	4
1	1	5	4	4	4	4	4	2	3	1	5	5	4	4	2	4	2	2
3	2	4	1	3	2	1	1	1	4	2	4	3	3	3	3	3	2	1
4	4	4	4	4	1	3	4	4	4	3	5	4	3	4	4	1	3	4
3	3	3	3	3	3	3	4	3	3	3	3	3	3	3	3	3	2	2
3	4	4	4	3	4	2	2	2	4	2	4	3	2	4	4	2	1	4
3	3	4	2	3	4	2	4	4	2	2	4	2	3	3	2	2	3	2
3	3	3	5	1	4	4	4	2	5	2	5	5	2	5	2	2	2	5
2	4	4	4	4	3	4	2	4	4	2	4	4	2	4	4	4	4	4
2	4	4	4	2	5	3	4	2	3	2	4	4	2	4	3	4	3	2
3	3	3	3	3	4	3	2	2	2	2	2	3	3	3	3	2	3	2
4	2	2	2	2	2	1	2	2	2	2	2	2	2	2	2	2	2	2
2	3	4	4	2	3	3	5	3	3	3	4	3	4	4	2	2	2	4
1	4	4	4	3	5	4	4	5	4	1	5	4	3	5	4	2	4	3
3	3	4	3	3	4	3	4	3	3	2	4	3	3	4	4	4	3	2
4	2	4	2	4	2	2	2	2	2	2	2	2	3	3	3	3	4	3
2	4	4	4	2	4	2	4	2	3	2	4	4	4	4	4	2	3	2
1	4	4	4	4	4	5	3	2	2	2	3	4	3	3	3	3	3	2
1	2	3	2	1	4	1	3	3	4	4	4	4	5	4	2	3	3	3
2	3	5	5	4	5	4	4	5	4	2	4	4	4	4	4	4	4	4
3	4	4	3	3	4	3	3	2	2	2	3	4	2	3	3	3	2	2
4	2	3	2	5	4	2	3	3	2	4	2	2	4	4	2	3	2	2
3	2	2	3	1	3	1	1	2	2	4	2	1	3	2	1	1	2	1
4	2	3	2	4	2	3	2	2	3	4	4	3	4	2	3	3	2	2
3	4	2	3	3	3	2	4	2	3	3	4	2	2	3	3	2	2	3
2	4	4	4	2	2	1	1	1	2	2	4	3	2	3	4	2	2	2
3	4	4	4	3	2	2	4	3	2	2	4	3	3	3	4	2	2	1
4	4	4	2	2	4	2	2	3	2	2	4	4	2	2	2	2	2	2
2	4	2	4	2	5	2	2	3	4	2	4	4	2	3	4	2	2	2
5	5	5	5	5	1	1	2	1	1	5	5	1	5	1	1	1	2	2
3	2	2	3	3	2	2	2	3	1	2	2	2	3	4	2	2	2	4
2	3	3	3	2	3	1	4	3	3	2	3	2	3	3	3	3	2	3
4	4	2	2	4	2	2	2	2	2	3	3	2	3	2	2	2	2	1
3	3	4	3	2	4	2	3	3	3	2	3	3	3	3	3	2	3	3
3	4	4	3	3	2	1	2	2	2	2	2	4	2	2	2	2	2	3
3	3	3	3	3	3	3	3	3	3	3	3	3	3	3	3	3	3	3
3	3	2	2	3	4	2	4	2	1	3	3	2	3	3	2	2	1	1
3	3	3	4	4	5	4	3	4	3	3	4	3	4	4	4	4	3	2
3	4	3	5	3	2	4	2	1	5	2	4	4	3	4	2	2	1	1
3	3	4	2	3	4	3	4	4	2	2	4	4	2	3	4	4	2	2
3	2	3	3	3	2	2	2	2	2	3	3	2	2	3	4	3	4	3
3	3	4	4	3	2	2	1	4	4	2	4	3	3	4	3	2	3	3
2	3	3	4	4	2	1	4	1	1	4	3	3	3	3	3	2	3	4
3	3	4	4	3	2	2	2	2	3	3	4	3	3	4	4	3	3	3
3	2	2	3	4	4	2	4	4	4	4	4	2	4	4	4	3	1	4
3	3	2	4	4	4	2	2	4	4	4	4	4	4	1	1	3	1	1
2	4	4	2	3	2	2	1	4	2	3	4	2	4	4	1	4	1	1
2	3	2	3	3	2	5	4	5	5	3	1	3	3	4	2	4	3	1
3	2	4	4	3	4	2	2	2	2	2	4	4	3	4	4	2	1	1
4	2	2	2	4	2	1	2	1	2	3	3	3	3	2	2	2	1	1
3	4	4	3	4	2	2	3	2	4	2	5	4	4	4	4	1	1	4
4	3	3	4	4	2	4	4	3	3	3	4	3	4	4	4	4	2	2
4	3	4	4	3	2	4	4	4	4	3	4	4	3	4	4	4	4	3
3	1	4	4	2	1	1	4	2	2	3	2	3	3	3	3	2	1	1
3	4	3	4	4	5	3	4	5	4	2	2	4	2	2	4	1	3	3
4	4	2	3	4	3	2	2	3	2	3	4	2	4	4	2	4	2	4
4	3	3	3	5	3	2	2	2	2	3	4	4	3	3	2	1	2	4
5	3	2	4	4	2	1	1	1	1	3	3	4	3	4	3	1	1	3
3	3	3	3	3	2	4	3	4	4	2	5	4	3	3	3	2	1	2
3	3	2	3	3	5	2	4	1	2	4	1	4	2	2	4	3	4	1
2	4	4	2	3	4	2	2	4	2	2	4	2	2	2	4	2	2	1
4	4	4	4	4	4	4	4	3	3	3	5	4	2	4	3	4	2	4
2	2	2	4	4	3	2	4	4	4	2	4	3	2	4	4	3	3	4
3	4	3	4	3	4	4	3	3	3	2	4	4	3	4	2	2	2	3
4	3	3	3	4	3	3	3	2	2	4	3	3	4	3	2	3	3	3
4	3	4	2	4	4	2	2	2	2	1	4	2	4	4	2	2	2	1
3	4	2	3	4	4	2	2	2	2	3	2	4	4	3	2	2	4	2
4	3	4	2	3	4	3	3	2	2	2	2	4	2	2	2	2	2	2
2	4	4	4	4	4	2	4	2	2	3	4	3	2	4	2	2	2	4
3	4	4	2	3	4	2	1	3	2	3	4	3	2	3	3	2	2	4
3	4	4	4	4	4	2	4	4	4	2	4	4	2	4	4	4	4	4
3	2	2	2	3	4	4	4	4	4	4	4	4	4	4	4	4	4	3
2	3	4	4	3	2	3	2	5	3	2	4	4	3	4	4	2	2	2
3	3	4	2	2	3	4	3	3	3	5	3	3	4	3	3	4	4	1
2	5	5	5	3	5	5	4	4	5	2	5	4	2	5	5	5	3	5
4	2	2	2	4	4	2	2	2	2	2	3	2	3	2	2	2	2	2
2	2	3	3	4	4	1	2	3	3	3	3	3	3	3	3	3	3	3
3	4	4	4	3	4	3	4	3	4	3	4	2	2	4	4	4	4	5
2	4	5	4	3	5	2	2	3	2	1	3	2	2	2	2	2	2	2
5	5	5	4	5	5	5	5	5	5	5	5	4	3	4	4	4	5	5
3	4	4	4	2	3	3	2	3	4	2	5	4	3	4	4	3	3	3
5	2	2	1	3	5	2	2	2	2	5	2	2	4	3	3	2	2	1
4	2	2	4	4	2	2	3	4	2	3	4	2	4	2	2	2	2	2
3	3	4	4	3	1	3	2	2	2	2	4	4	3	4	3	2	2	3

## Sheet: Depression Scale
1	1	1	1	1	1	1	1	1	1	1	1	1	1	1	1	2	2	3	4
4	4	4	4	4	4	4	4	4	4	4	4	4	4	3	4	4	4	4	4
3	3	2	2	3	2	2	2	2	2	1	1	2	3	2	2	1	3	2	3
2	2	2	2	1	1	2	1	1	2	2	2	2	2	2	2	2	2	1	1
1	2	2	2	2	1	2	2	2	3	3	3	3	2	1	2	2	3	3	3
1	3	1	1	1	1	1	1	1	1	1	1	1	1	1	1	1	1	1	1
2	3	1	1	1	1	1	1	1	1	1	1	1	1	1	1	1	1	1	1
1	2	1	2	4	3	3	1	3	1	4	3	2	1	3	1	1	1	1	1
1	2	1	3	4	2	1	2	1	2	1	1	1	1	2	2	4	2	3	3
2	4	1	1	1	4	4	1	1	3	3	3	2	2	2	1	2	1	1	2
2	2	2	3	2	2	1	1	1	1	1	1	1	1	1	1	1	1	1	1
2	2	1	3	3	1	1	1	1	2	2	2	1	4	2	1	2	4	1	3
1	1	1	1	3	1	1	1	1	1	1	1	1	1	1	1	1	1	1	1
2	2	1	1	2	1	2	1	1	1	3	1	1	4	1	3	1	4	1	3
1	4	1	3	1	1	1	1	1	1	1	1	1	4	1	1	1	3	1	3
3	2	1	2	1	1	2	1	1	2	1	1	1	3	2	2	2	2	2	2
2	2	1	1	4	1	1	1	1	2	2	2	1	1	2	1	1	2	1	3
2	2	1	1	1	3	1	1	1	1	4	4	4	3	1	1	4	3	1	2
1	2	1	2	1	3	1	1	3	2	4	2	1	3	1	2	3	4	3	3
2	2	2	3	2	2	1	1	1	2	1	1	2	2	2	2	2	2	2	2
3	2	1	4	4	2	2	4	3	2	3	3	2	2	2	2	1	2	3	2
1	2	1	1	3	1	1	1	2	2	1	1	1	4	1	3	3	2	1	3
3	2	1	3	3	3	1	1	2	3	3	2	2	3	1	3	3	2	1	3
1	4	1	1	3	3	1	1	1	1	4	1	1	4	1	4	4	4	1	3
2	2	1	3	3	1	1	1	2	3	2	2	1	1	1	1	1	1	1	1
1	2	1	2	3	2	2	1	1	1	3	3	1	3	1	3	3	3	1	3
2	2	2	2	2	2	2	2	2	2	2	2	2	2	2	2	2	2	2	2
2	2	2	2	2	2	2	2	2	2	2	2	2	2	2	2	2	2	2	2
2	1	1	2	3	2	1	1	1	1	3	1	1	1	1	1	2	2	2	2
2	2	2	2	2	2	2	2	2	2	2	2	2	2	2	2	2	2	2	2
1	2	1	1	1	1	1	1	1	1	1	1	1	1	1	1	1	1	1	1
2	1	1	1	1	2	1	1	1	1	1	1	1	1	1	1	1	1	1	1
2	4	1	3	2	2	1	1	1	2	2	2	1	2	2	2	2	2	2	2
2	2	1	3	2	1	2	4	2	1	2	2	1	3	2	4	2	2	2	4
1	4	1	1	3	4	2	1	4	1	4	1	1	4	1	3	4	4	1	4
2	2	1	1	1	2	1	1	1	2	2	2	2	2	2	2	2	1	2	1
1	3	1	2	3	2	1	1	1	1	3	3	3	3	2	3	2	2	1	3
2	2	1	2	3	2	2	2	2	2	2	2	2	2	2	2	2	2	2	2
1	2	1	1	1	1	2	1	1	1	1	1	1	1	1	1	1	1	1	1
2	3	1	1	1	1	1	1	1	2	2	1	1	4	1	1	1	3	1	1
2	1	1	1	1	2	4	1	1	2	3	1	2	3	1	1	3	4	1	2
1	2	1	2	3	2	1	1	1	1	3	1	2	4	1	1	1	4	1	3
1	2	1	1	3	3	3	1	1	1	1	3	1	4	1	1	1	3	2	2
2	3	1	2	2	2	2	1	1	3	3	3	1	1	1	1	2	1	1	1
2	3	2	2	1	2	1	1	1	1	2	1	1	2	1	1	1	1	1	1
2	3	1	2	2	3	2	1	2	2	2	2	2	2	2	2	2	2	2	2
2	2	1	2	2	2	2	2	2	2	2	2	2	2	2	2	2	2	2	2
1	2	1	1	2	2	2	1	1	1	3	1	1	3	1	1	3	4	1	1
1	1	2	2	1	1	1	1	1	2	2	1	2	1	1	2	3	2	1	1
1	3	2	2	4	2	1	1	1	1	4	2	1	4	1	1	4	4	1	1
1	3	1	1	3	3	1	2	1	2	3	3	1	1	1	3	3	3	1	3
2	4	1	2	2	4	1	1	1	1	3	3	1	3	3	3	3	4	1	4
1	2	1	2	4	1	1	1	1	1	3	3	1	2	1	1	2	2	1	3
1	3	1	1	3	1	1	1	1	1	2	2	1	3	1	3	2	3	1	3
1	3	2	3	1	1	1	1	3	3	1	1	2	2	1	1	1	2	2	1
2	3	2	2	2	2	2	1	2	1	3	2	2	3	1	2	2	1	2	3
1	1	1	1	1	1	1	1	2	2	2	3	3	3	2	2	3	3	2	2
4	4	4	4	4	4	4	4	4	4	4	4	4	4	4	4	4	4	4	4
1	1	1	4	1	1	4	1	4	4	4	4	4	4	1	4	4	4	1	4
2	2	2	2	1	2	2	1	1	1	1	1	1	1	1	1	1	1	1	1
1	3	1	1	1	1	1	1	1	1	1	1	1	1	1	1	1	1	1	1
2	2	2	2	2	2	2	2	2	2	2	2	2	2	2	2	2	2	2	2
3	3	3	3	3	3	3	1	3	2	2	2	4	4	3	2	3	3	2	2
1	2	1	3	2	2	3	1	2	1	3	3	1	3	1	3	2	3	3	3
2	2	1	3	3	3	1	1	2	2	3	3	2	3	2	1	2	2	1	3
2	2	2	2	2	2	2	1	2	1	2	1	2	2	1	2	1	2	2	2
2	2	2	2	4	2	2	3	2	3	2	3	2	2	2	2	1	2	1	3
2	2	2	3	2	3	2	2	2	2	2	3	2	1	2	1	2	1	2	1
2	1	2	2	1	3	2	1	1	2	1	2	1	1	1	2	1	1	1	1
1	1	1	1	1	1	1	1	1	1	1	1	1	1	1	1	1	1	1	1
1	2	1	1	1	1	1	1	1	1	3	2	1	3	1	2	1	2	1	3
2	2	2	2	2	2	1	1	2	2	3	2	2	2	2	2	2	2	2	2
2	1	1	1	3	3	3	2	1	1	3	2	1	4	1	3	4	4	1	2
1	2	1	2	3	2	1	1	1	2	3	3	1	2	1	3	1	2	1	2
2	1	1	1	2	2	1	1	1	2	3	4	2	3	2	1	2	2	1	4
2	2	2	2	2	2	2	2	2	2	2	2	2	2	2	2	2	2	2	2
2	2	1	1	2	4	3	1	1	1	1	1	1	1	2	2	2	1	1	1
2	1	2	1	4	2	2	2	1	4	1	1	4	2	3	1	2	2	3	2
1	1	1	1	1	1	1	1	1	1	1	1	1	1	1	1	1	1	1	1
3	3	1	1	3	2	1	1	1	3	2	1	1	1	1	1	2	2	1	4
2	2	1	2	3	3	2	2	2	1	3	3	1	3	1	3	3	3	1	4
1	2	1	2	2	2	2	2	2	2	4	3	1	3	1	3	3	4	1	3
2	1	2	3	1	1	2	2	2	2	2	2	2	1	1	1	1	1	2	2
1	2	1	1	1	1	1	1	1	1	4	4	1	4	1	1	4	4	1	4
1	2	1	1	1	1	1	1	1	1	3	1	1	3	1	1	2	2	1	1
1	1	1	1	1	1	1	1	1	2	1	1	1	4	1	1	2	3	2	2
3	1	3	2	1	1	1	1	2	3	2	1	2	2	3	1	3	1	1	2
2	2	1	2	2	2	2	2	2	2	2	2	2	2	2	2	2	2	2	2
2	2	1	2	3	3	2	1	1	2	3	3	2	3	1	2	3	3	1	2
1	4	1	2	1	1	1	1	1	2	1	2	1	2	1	2	1	2	1	2
2	2	1	1	3	1	1	1	1	2	2	2	2	4	3	2	2	3	1	2
2	2	1	2	4	1	2	1	2	2	2	2	1	3	1	3	3	3	1	3
2	2	1	1	3	3	1	1	1	1	2	2	1	2	1	1	1	2	1	1
1	2	1	2	1	1	2	2	1	1	4	4	2	4	1	2	2	3	1	2
3	1	2	2	3	1	1	1	1	3	1	1	2	1	1	1	1	1	1	1
1	1	1	1	1	1	2	1	1	2	3	3	3	2	1	2	1	2	1	2
1	1	1	1	1	1	1	1	1	1	1	1	2	2	3	3	4	2	3	3
3	3	1	3	3	4	3	3	2	2	3	2	2	2	3	3	3	2	2	1
2	1	1	1	2	1	1	1	1	1	2	1	1	3	1	1	2	2	1	3
2	1	2	2	3	2	2	2	3	3	3	3	2	2	2	3	2	2	1	3
2	2	2	2	2	2	2	2	2	2	2	2	2	2	2	2	2	2	2	2
2	2	2	2	3	3	1	2	2	2	2	2	2	2	2	2	2	2	2	2
2	3	2	2	2	2	2	3	2	2	2	2	2	2	2	1	1	1	1	1
2	2	2	1	3	2	1	1	1	2	2	3	2	2	1	2	2	2	1	3
1	1	1	1	1	1	1	1	1	1	1	1	1	1	1	1	1	3	1	3
1	2	1	2	2	2	1	1	2	2	4	3	2	3	1	3	3	3	1	3
2	2	2	2	2	2	3	2	1	3	2	1	1	1	2	1	1	2	2	1
1	3	1	1	3	1	2	2	2	1	3	3	1	3	1	2	3	3	1	3
2	3	1	2	1	3	1	1	1	2	3	2	3	4	2	2	4	4	1	2
3	3	2	2	3	2	2	1	2	3	2	3	3	2	2	3	2	3	2	4
2	1	1	1	4	1	2	1	2	1	2	1	2	2	2	2	2	2	1	2
1	2	1	1	2	1	1	1	1	1	1	2	2	4	1	2	2	4	1	2
2	3	3	3	3	3	2	1	2	3	3	3	3	3	3	2	2	1	1	2
2	2	1	1	2	1	2	1	1	3	2	2	2	3	1	4	4	4	1	4
3	1	2	1	4	2	1	3	3	3	3	2	3	3	3	2	3	3	3	2
3	2	2	2	2	2	1	1	2	4	3	2	3	3	3	3	3	3	3	3
2	1	1	1	1	2	1	1	2	4	2	4	2	1	2	2	2	3	1	2
4	1	3	4	1	1	1	3	2	4	1	2	3	1	1	2	1	1	3	1
1	1	1	1	1	1	1	1	1	1	2	1	3	2	2	1	1	1	1	1
3	2	2	4	4	4	1	1	3	4	2	2	4	2	3	2	2	2	1	3
2	1	1	2	2	1	1	1	1	2	2	2	2	1	1	2	2	2	1	2
2	2	2	3	1	3	1	1	3	2	2	2	2	2	1	2	2	2	1	2
1	4	1	1	4	1	1	1	1	1	4	4	1	3	1	4	1	2	1	4
2	3	1	2	4	3	1	1	1	2	3	4	1	4	3	2	4	4	1	4
2	1	1	3	3	1	1	2	2	3	2	2	2	2	2	1	2	2	1	2
2	2	1	2	1	2	1	1	1	1	1	1	1	4	1	1	2	3	1	1
2	3	2	1	3	3	1	1	2	2	3	2	3	4	2	1	2	2	1	3
2	2	1	2	1	1	1	3	1	3	1	1	2	1	2	2	2	2	1	2
2	1	2	3	3	4	1	1	2	2	3	2	1	3	1	2	3	2	1	3
2	1	1	1	2	4	1	3	1	1	3	3	1	3	1	2	3	3	1	2
1	2	1	4	3	3	1	2	2	1	3	2	2	3	2	3	3	1	1	3
2	2	1	1	1	2	2	1	1	2	3	4	2	2	2	2	2	2	1	1
2	3	2	1	4	2	1	1	1	2	4	2	1	3	1	1	4	2	1	4
2	2	1	1	4	2	1	1	1	1	3	3	2	2	1	2	2	3	1	3
2	1	2	3	2	1	1	1	1	2	2	2	2	3	2	1	1	2	1	1
2	1	2	2	3	1	2	2	1	3	2	3	3	2	2	2	2	2	1	2
1	1	2	1	2	1	1	1	1	3	3	4	3	1	1	1	2	1	1	2
2	1	1	2	3	2	1	2	1	1	4	3	2	3	1	3	2	3	1	4
2	3	2	2	3	1	2	1	2	2	2	2	2	3	1	3	4	4	1	3
2	2	1	2	2	1	1	2	1	2	2	3	2	2	1	1	2	2	1	2
1	1	1	1	3	2	1	1	1	3	2	1	3	4	1	1	4	3	1	3
1	2	1	1	3	2	1	1	1	2	2	2	3	4	2	2	4	3	1	3
1	1	3	3	4	3	1	1	2	2	4	1	2	3	2	3	4	3	1	1
1	3	1	1	4	2	2	1	1	1	4	1	2	2	1	2	4	2	1	2
1	2	1	1	1	2	3	1	1	1	4	3	1	4	1	2	4	3	1	4
1	1	1	2	3	3	1	1	1	2	3	3	1	4	1	1	4	3	1	4
2	3	1	2	4	1	1	1	1	3	4	4	2	4	1	1	4	2	1	4
1	1	1	2	3	1	1	1	1	1	3	2	2	2	1	2	2	2	1	2
1	1	2	3	1	3	1	1	3	3	2	2	1	4	3	2	4	4	1	4
3	2	3	3	2	2	2	2	2	3	2	3	3	4	3	2	2	2	2	2
2	2	1	2	3	3	2	1	2	2	3	3	2	3	2	1	2	3	1	3
2	1	2	2	1	2	1	1	1	2	1	1	2	2	1	2	3	2	1	2
2	1	1	2	2	1	1	3	2	4	1	1	2	1	2	1	1	1	1	1
2	2	2	2	2	2	2	2	2	2	2	2	2	2	2	2	2	2	2	2
2	2	2	2	2	2	1	1	2	2	2	2	2	2	2	2	2	2	2	2
2	1	1	2	1	1	1	2	1	2	2	2	1	1	1	2	2	2	1	2
2	2	2	2	2	2	2	2	3	2	2	3	2	2	2	2	2	2	2	2
1	3	3	3	2	2	2	2	2	2	2	2	2	2	2	2	2	2	2	2
2	2	3	2	2	1	2	2	3	3	3	1	2	1	1	1	2	3	2	2
4	1	1	1	4	4	1	1	1	1	4	1	1	1	1	1	4	4	1	4
1	1	2	4	4	3	3	3	1	2	3	2	2	2	1	2	2	2	2	4
2	2	1	1	2	1	2	1	2	3	3	3	3	2	2	3	3	2	3	3
2	1	1	2	3	2	1	3	2	3	2	3	2	2	2	2	2	2	2	3
2	3	1	2	2	1	1	1	1	1	1	1	1	1	1	3	1	1	1	2
1	1	1	1	1	2	2	1	1	1	3	2	2	1	1	2	3	3	1	3
1	2	1	1	3	1	1	1	3	3	3	3	3	4	2	2	4	4	1	4
2	3	1	2	3	2	2	1	1	1	2	2	2	2	2	2	2	2	2	2
2	1	3	3	4	4	1	1	3	3	3	2	2	1	2	2	2	3	2	3
1	1	1	1	2	2	1	1	1	1	1	1	1	1	1	1	3	3	1	2
2	2	2	1	2	2	2	1	2	2	3	2	2	3	2	2	3	4	1	1
1	2	1	3	2	2	1	1	1	1	3	3	2	3	1	3	3	3	3	3
2	2	1	2	3	1	1	1	2	3	1	2	2	2	1	2	2	2	2	4
2	1	2	1	3	2	2	1	2	1	3	2	1	2	1	1	2	2	1	1
2	1	1	2	4	1	1	1	1	2	1	1	2	2	2	1	1	2	1	3
2	2	2	2	2	2	2	2	2	2	2	2	2	2	2	2	2	2	1	3
1	1	1	1	4	4	1	1	1	2	2	2	1	2	1	3	3	3	1	2
1	2	1	3	3	3	1	1	1	1	2	2	1	3	1	4	4	4	1	2
1	2	1	1	4	4	1	4	1	2	4	4	1	4	1	3	4	4	1	4
3	1	2	3	3	1	1	1	1	2	1	1	2	2	1	1	1	2	3	1
2	2	1	1	4	4	1	1	1	2	3	3	2	2	1	2	2	3	1	4
1	3	1	1	3	1	2	1	1	2	2	1	1	3	1	2	2	3	2	3
1	2	1	1	3	2	2	1	1	1	4	4	1	4	1	3	4	4	1	4
2	2	2	1	1	2	1	1	2	1	1	1	1	3	1	2	3	3	2	3
1	2	1	1	4	1	1	1	1	2	3	3	2	4	1	1	3	3	1	4
1	2	1	1	3	3	1	1	1	1	3	3	2	2	1	1	3	3	1	3
1	2	1	1	4	3	1	1	1	1	4	3	2	3	1	3	4	3	1	4
1	2	1	2	3	3	1	1	1	1	3	3	1	3	1	1	4	3	1	3
2	2	1	2	3	1	1	1	2	3	2	2	2	2	2	1	2	2	1	2
3	2	2	1	3	1	1	1	1	1	2	2	2	2	2	2	2	3	1	3
2	2	1	1	4	2	1	1	1	1	3	3	1	3	1	2	3	3	1	3
1	4	1	1	4	4	1	1	1	2	3	4	1	4	1	3	4	4	1	4
2	3	1	1	4	2	1	1	1	2	3	3	2	4	1	2	3	4	1	4
1	1	1	1	4	1	1	2	1	1	2	2	1	2	1	2	1	3	1	2
1	1	1	2	3	2	2	1	2	1	2	3	1	4	1	4	2	4	1	4
1	2	1	2	4	2	1	1	1	1	4	3	1	4	1	3	4	3	1	3
2	1	1	2	3	1	1	2	2	4	2	3	3	2	2	1	1	1	1	3
2	1	1	1	1	2	1	1	1	1	1	1	1	3	1	2	1	1	1	2
1	1	1	1	4	1	1	1	1	1	3	2	1	1	1	2	2	1	1	2
2	1	1	2	4	1	1	3	2	2	3	3	2	2	2	3	1	2	2	3
3	2	2	3	3	2	1	3	3	2	3	2	2	2	2	2	2	2	1	4
1	3	1	1	2	2	2	2	2	2	2	2	3	2	2	2	2	2	2	2
1	3	1	1	3	3	1	1	1	1	1	1	1	2	1	1	1	2	1	1
1	2	1	1	1	2	1	1	2	1	3	2	2	3	2	1	1	1	1	3
1	1	1	1	1	1	1	1	1	1	4	3	1	4	1	4	4	4	1	4
1	4	1	1	3	1	1	1	1	1	4	4	2	4	1	3	4	4	1	4
2	3	2	2	2	2	2	1	1	2	2	2	2	2	2	3	3	4	1	4
2	3	1	2	1	4	1	2	1	3	2	2	3	3	2	1	3	3	1	4
1	1	1	2	3	3	1	1	1	1	3	3	2	3	1	2	2	2	1	3
1	3	1	1	3	3	1	1	1	1	3	3	1	4	1	3	3	4	1	3
2	1	1	2	3	1	1	3	1	4	1	2	2	1	1	1	2	2	1	3
2	2	1	1	3	2	1	1	1	2	2	2	2	2	1	2	2	2	1	2
1	1	1	1	1	1	1	1	1	2	1	2	1	3	1	2	3	3	1	3
3	2	3	4	4	1	1	2	1	2	4	2	2	2	3	3	2	1	2	4
1	2	1	1	4	2	1	1	1	1	3	2	1	2	1	2	2	2	1	3
1	4	4	4	2	1	1	1	2	1	4	2	1	4	1	1	4	4	1	4
1	2	1	1	3	2	1	1	1	2	3	2	2	3	1	2	2	3	1	3
2	2	1	1	3	2	2	1	1	2	2	2	1	2	1	2	3	3	1	3
1	2	1	1	2	2	2	1	1	1	3	2	1	3	1	2	2	3	1	2
2	2	2	3	2	1	1	2	1	1	3	2	1	3	1	2	2	2	1	3
1	2	1	1	3	2	1	1	1	2	2	2	2	2	1	2	2	2	1	2
1	2	1	2	1	2	1	2	1	1	2	1	3	3	1	1	2	2	1	3
2	1	2	1	4	2	1	2	1	2	3	2	1	3	2	2	3	3	1	4
1	3	1	1	3	2	1	1	1	1	4	3	1	2	1	2	1	2	1	3
1	2	1	1	4	2	1	2	1	2	1	3	1	3	1	2	3	2	1	3
1	3	1	1	3	1	1	1	1	1	1	2	1	3	1	1	1	1	1	2
1	2	1	2	4	3	1	2	1	2	3	3	1	3	2	2	2	2	1	3
2	2	2	2	2	4	2	1	2	2	4	2	2	3	1	2	3	2	1	4
1	1	1	3	3	2	1	1	1	3	2	2	3	2	2	2	3	2	1	3
3	2	2	4	4	4	1	1	2	3	2	2	2	2	2	2	3	2	1	2
1	2	1	1	3	1	3	3	1	1	1	1	1	1	1	1	1	1	1	1
2	1	2	2	3	3	1	1	1	1	3	2	2	3	1	2	2	3	1	3
2	2	1	1	4	3	1	1	2	2	3	3	1	4	1	3	4	4	1	4
2	4	2	2	2	3	1	1	2	2	2	2	2	4	1	1	3	2	1	2
2	2	1	2	3	1	2	1	1	1	1	1	1	3	1	1	1	1	1	1
1	2	1	1	4	2	2	2	2	1	4	3	2	4	2	3	4	4	1	4
2	1	1	2	3	1	1	3	2	3	2	2	2	2	2	2	2	2	2	2
3	3	3	2	3	2	2	3	2	3	3	4	1	4	3	3	2	3	2	3
1	1	1	3	4	1	1	2	1	1	4	4	1	4	1	2	4	4	1	4
1	1	1	2	2	1	1	1	1	3	2	2	1	2	1	2	2	3	1	3
2	3	1	2	3	2	1	2	1	2	3	2	2	2	1	2	2	2	1	3
1	2	1	1	4	3	1	1	1	2	4	3	2	4	2	4	4	4	1	4
1	3	1	1	3	3	1	1	1	1	1	3	1	3	1	2	4	3	1	3
2	3	1	3	2	3	2	3	2	3	2	2	3	2	2	3	3	2	2	3
1	1	1	1	1	1	1	1	1	1	1	1	1	1	1	1	1	1	1	1
2	2	1	2	2	1	1	1	2	2	1	2	2	3	3	3	2	2	3	2
3	3	3	3	3	3	3	3	3	1	1	1	1	1	1	1	1	1	1	1
1	3	1	1	1	3	1	1	1	1	3	2	1	3	1	2	2	3	2	3
1	2	1	1	1	1	2	1	2	2	4	4	1	4	1	1	4	4	1	4
1	1	1	1	1	1	1	1	1	1	2	1	1	1	1	1	2	1	1	1
2	2	1	1	1	2	1	3	2	2	3	2	1	2	1	2	2	2	1	1
1	1	1	3	2	2	3	2	2	3	2	3	2	4	2	3	3	3	1	1
2	3	1	2	2	2	2	1	1	1	2	2	1	1	4	4	1	1	3	2
2	2	1	4	2	2	2	2	2	2	2	2	2	3	2	2	2	2	2	3
2	2	2	2	3	3	2	3	3	2	3	3	2	3	2	2	3	3	3	2
2	3	4	4	2	2	4	4	1	1	2	2	1	4	3	4	4	2	2	1
1	4	1	1	4	1	1	2	1	1	4	3	1	4	1	1	4	4	1	4
1	2	1	2	2	1	1	1	2	2	3	2	1	2	1	3	1	2	1	3
3	1	1	4	2	3	1	1	1	2	3	2	3	4	1	2	2	1	2	2
1	2	1	2	4	2	3	1	1	1	1	1	1	1	1	1	1	1	1	1
1	4	1	1	4	1	1	1	1	1	4	1	1	4	1	1	3	4	4	4
1	3	1	1	3	3	1	1	1	1	3	1	1	3	1	3	3	3	1	3
1	3	1	2	3	1	2	1	2	1	1	2	1	1	1	2	3	3	1	2
1	1	1	1	3	3	1	2	1	2	2	2	2	3	2	3	3	3	1	3
1	2	1	3	1	1	1	1	1	1	3	3	1	2	2	2	2	1	1	2
2	2	1	2	3	3	2	1	2	2	3	2	2	3	2	2	3	3	1	3
2	2	1	2	2	3	2	1	2	4	1	2	3	4	3	3	3	2	2	2
3	2	1	1	2	2	2	1	3	2	3	3	2	1	2	2	3	2	1	2
1	1	1	1	1	1	1	1	2	3	2	3	2	2	3	2	3	2	3	2
3	3	3	3	3	2	3	3	3	2	3	3	2	3	3	3	3	2	3	3
1	3	1	1	3	2	1	1	2	1	3	2	1	3	1	2	3	3	1	3
1	2	1	1	4	2	1	2	1	1	3	3	1	4	1	2	3	3	1	3
2	2	1	2	4	3	2	1	2	1	4	3	2	3	1	3	2	3	1	4
3	1	1	2	3	3	2	1	1	2	3	3	3	1	2	3	4	4	1	4
2	2	1	1	1	1	2	1	1	1	1	3	1	2	1	2	2	2	1	2
1	2	1	1	1	1	1	1	1	1	2	2	1	3	1	2	2	3	1	3
1	3	1	1	3	3	1	2	1	2	3	3	1	3	2	3	3	3	1	3
1	2	1	1	4	3	1	1	1	1	3	3	1	4	1	2	4	4	1	4
1	3	1	1	3	3	1	1	1	2	2	2	2	3	1	1	3	1	1	3
1	1	1	1	3	1	1	1	1	1	3	2	1	3	1	2	3	2	1	3
3	2	1	2	4	3	2	1	1	2	3	3	2	3	1	3	2	3	2	2
2	2	1	2	2	2	1	1	2	2	3	3	2	3	1	3	2	3	1	4
1	2	1	1	4	3	2	1	1	1	2	3	1	4	1	4	4	4	1	4
1	2	1	1	3	2	2	1	1	2	1	1	1	4	1	2	4	3	1	2
2	1	1	2	3	1	1	1	1	1	3	3	1	2	1	2	2	2	1	3
3	1	1	3	3	2	2	2	1	2	2	2	2	2	2	3	2	3	2	3
1	1	1	2	4	1	1	1	1	1	3	2	2	4	1	1	4	2	1	4
1	1	1	2	2	2	1	1	2	2	3	2	1	3	1	2	2	3	1	3
2	3	1	3	3	3	1	1	1	2	3	3	1	3	1	2	3	3	1	4
2	1	1	1	1	1	3	2	1	2	3	3	1	3	1	2	2	2	1	3
2	2	1	2	4	2	1	2	2	2	3	3	1	4	2	3	4	3	1	3
2	1	1	2	4	2	1	1	2	2	3	4	2	4	1	2	3	2	1	3
2	4	1	2	4	2	1	1	1	2	3	4	1	4	1	1	3	4	1	4
4	4	4	4	4	4	4	4	4	4	4	4	4	4	4	4	4	4	4	4
3	2	2	4	2	2	3	2	2	4	3	2	3	1	2	3	3	2	3	2
2	3	2	2	3	2	2	1	1	1	1	1	1	1	1	1	1	1	1	2
2	2	2	2	2	2	3	2	2	2	2	3	2	3	2	1	2	2	2	2
2	2	2	2	4	2	1	1	2	2	3	3	1	4	1	4	4	4	1	4
2	2	2	1	4	2	1	1	1	1	3	2	2	2	1	1	2	2	1	3
1	2	1	1	1	1	1	1	1	1	1	1	1	1	1	3	3	3	1	3
1	2	1	1	4	1	1	1	2	1	3	3	1	4	1	1	4	4	1	4
2	1	1	1	1	2	1	1	1	1	1	1	1	1	1	1	2	2	1	1
2	2	1	1	4	1	1	2	1	2	2	4	2	4	1	2	4	3	1	3
2	2	1	1	3	1	2	1	2	1	3	3	1	2	1	4	3	3	1	4
1	1	1	2	3	1	2	2	1	3	2	3	2	3	1	2	2	3	1	3
2	2	1	1	4	2	1	1	2	3	3	3	2	4	1	3	3	3	1	1
1	1	1	1	4	2	2	2	1	1	3	4	2	3	1	4	3	4	1	3
2	1	1	2	4	1	1	2	1	1	4	2	1	1	1	1	2	2	1	4
1	3	1	1	3	3	1	1	1	1	3	3	2	3	1	3	3	3	1	3
4	2	4	3	2	1	4	1	2	4	4	2	2	1	4	2	1	1	4	4
1	2	1	1	3	1	2	1	1	1	3	3	1	3	1	3	3	2	1	3
3	3	3	3	2	1	2	1	3	3	1	1	3	1	1	1	2	1	1	2
3	2	2	2	4	2	1	1	2	2	3	3	1	4	2	2	4	3	1	4
1	4	1	1	4	4	1	1	1	1	4	4	1	4	1	4	4	4	1	4
1	2	1	1	3	3	1	1	1	1	3	2	1	3	1	2	3	3	1	3
2	1	1	3	4	4	1	1	1	2	3	2	2	4	2	3	3	3	1	4
4	3	3	2	3	2	2	2	3	4	2	3	3	2	4	2	3	3	3	3
2	1	1	1	4	1	1	2	1	3	3	1	1	2	1	2	3	3	1	4
3	3	1	1	4	3	1	1	1	1	3	3	1	3	1	3	3	3	1	3
1	1	1	1	1	1	1	1	1	1	1	1	1	3	1	3	3	3	1	3
1	1	1	1	3	1	2	1	1	1	3	2	1	3	1	2	3	3	1	3
1	1	1	1	4	2	1	1	1	1	1	1	1	1	1	1	1	1	1	1
2	2	2	2	2	2	2	2	2	2	2	2	2	2	2	2	2	2	2	2
3	2	2	3	2	2	2	2	2	2	2	3	2	2	2	3	3	3	3	3
1	2	1	1	1	1	2	1	2	2	2	2	2	2	2	2	2	2	2	2
2	3	1	3	3	2	1	1	1	1	3	1	1	3	3	2	2	2	2	3
2	3	1	4	2	2	2	2	3	3	2	3	3	3	1	1	1	1	1	1
1	1	1	1	3	3	1	1	1	1	4	1	1	1	1	1	2	2	2	2
2	2	2	2	2	2	2	1	1	2	2	1	2	3	2	1	2	2	1	3
2	3	2	3	4	2	1	2	2	2	2	2	2	3	1	2	2	2	2	3
2	2	1	1	4	2	1	1	1	3	2	2	3	3	2	2	2	4	1	2
2	1	1	2	3	1	2	1	1	2	3	2	2	2	1	3	1	1	2	3
1	2	2	1	4	1	1	1	1	2	3	3	1	4	1	2	2	4	1	3
2	1	1	1	3	1	2	1	1	3	2	2	4	2	3	1	1	2	2	3
2	2	2	2	2	2	2	1	1	1	2	2	2	3	2	2	2	2	1	3
2	4	1	1	4	4	1	2	2	1	4	2	2	4	2	2	4	3	1	3
2	2	1	2	3	1	1	1	1	3	3	2	2	3	2	2	3	2	1	3
1	2	2	1	3	2	1	1	1	3	2	3	2	3	1	2	2	2	1	3
2	2	2	1	2	1	1	2	2	2	2	3	2	3	2	2	3	3	1	1
2	2	1	3	3	1	1	3	1	2	3	3	2	2	2	3	3	3	1	2
2	1	1	1	1	1	2	1	2	2	3	3	2	3	2	4	4	4	1	2
1	2	1	1	1	1	1	1	1	1	3	3	1	2	1	2	1	2	1	2
2	1	1	1	1	4	1	1	1	1	1	2	3	2	2	2	2	2	1	1
1	1	1	2	4	2	1	1	1	2	2	4	2	2	1	2	2	1	2	2
2	3	1	3	3	3	1	1	1	2	3	3	4	2	1	1	1	2	1	2
2	2	1	2	4	4	1	1	1	3	2	1	3	1	2	2	2	2	1	3
3	1	1	2	3	2	1	1	1	3	3	3	2	1	1	1	1	1	1	4
2	1	2	4	3	4	1	1	1	4	2	2	2	1	2	1	1	2	1	3
2	1	1	3	2	1	2	1	2	2	2	2	2	2	2	2	2	2	1	2
1	1	1	2	1	2	1	1	1	1	2	3	2	1	1	1	1	1	1	2
2	2	1	1	3	2	2	1	1	2	2	3	2	3	1	2	3	3	1	3
3	2	2	3	4	3	1	2	2	3	3	3	2	2	2	1	2	2	1	3
2	2	2	2	2	2	2	2	2	1	2	3	2	2	2	2	2	2	2	2
3	1	1	1	3	3	1	1	2	2	3	2	2	3	1	2	2	3	1	2
3	1	1	2	3	1	1	1	1	2	3	3	1	3	1	2	2	1	1	3
1	2	1	2	2	1	1	1	1	2	3	2	1	1	1	2	3	3	1	3
2	3	1	1	2	4	2	1	3	3	3	3	2	3	2	1	3	4	1	2
1	1	1	1	1	1	2	1	3	2	4	3	1	3	1	3	4	3	1	3
1	1	1	1	2	1	1	1	1	2	1	1	1	3	1	2	1	3	1	2
1	2	1	3	3	3	1	2	1	2	2	3	1	2	1	2	2	2	1	2
1	1	1	1	3	2	1	1	2	2	2	3	3	2	1	2	2	2	1	3
3	2	3	3	3	4	2	2	1	1	2	3	4	1	2	2	2	3	3	3
1	2	1	1	1	1	1	1	1	1	1	1	1	4	2	3	3	3	1	3
2	3	2	2	2	2	2	1	1	2	3	4	4	4	4	3	2	2	3	3
2	2	2	2	2	2	2	2	2	2	2	2	2	2	2	2	2	2	2	2
2	2	1	1	1	1	1	1	1	1	1	1	1	1	1	1	1	1	1	1
2	1	2	4	2	1	2	3	1	3	2	1	3	2	2	2	1	1	2	2
2	2	2	2	3	1	1	2	2	2	2	2	1	2	1	3	1	2	1	2
2	3	1	1	1	4	2	2	2	2	2	2	2	2	2	2	2	2	2	2
1	2	1	1	4	3	2	2	2	1	1	1	1	3	2	1	3	2	1	3
2	1	1	1	1	1	1	1	1	1	1	1	1	1	1	1	1	2	1	4
2	2	1	2	3	2	1	2	2	2	3	3	1	3	2	3	3	2	1	3
2	1	1	1	4	3	1	2	1	2	4	4	2	4	1	2	3	3	1	3
2	3	1	2	2	1	1	1	1	1	1	1	2	2	1	1	1	1	1	2
1	3	1	1	4	4	1	1	1	1	4	4	1	4	1	4	4	4	1	1
3	2	1	2	3	3	3	1	1	4	2	2	2	3	3	1	3	3	1	3
1	3	1	1	1	2	2	2	1	2	3	2	1	4	1	2	2	3	1	3
1	1	1	1	1	1	1	1	1	1	1	1	1	1	1	2	2	2	1	1
2	2	1	2	3	1	1	2	2	2	3	3	2	3	2	2	2	2	1	2
1	3	1	1	3	3	1	1	1	1	3	3	1	4	1	2	3	3	1	3
1	2	1	1	4	3	1	1	1	1	4	3	1	4	1	2	3	4	1	4
2	2	1	2	2	2	2	2	2	2	2	2	2	3	1	2	4	4	1	2
3	3	1	2	3	2	2	2	2	2	2	3	2	3	2	2	2	2	2	3
1	2	1	1	3	4	1	1	1	1	4	4	1	4	1	4	4	4	1	4
2	3	1	2	4	2	2	2	2	2	2	2	3	3	3	3	3	3	1	3
2	1	1	1	3	1	1	1	1	2	1	1	2	2	1	1	2	2	2	2
2	3	1	1	3	3	1	1	1	1	4	3	1	3	1	2	2	3	1	3
1	4	1	1	4	4	1	1	1	1	2	4	1	4	1	2	4	3	1	3
1	4	1	1	3	1	1	1	1	1	3	2	1	1	2	2	3	2	1	2
2	2	2	2	2	2	1	1	1	2	3	3	2	4	1	2	3	3	1	3
1	1	1	1	4	2	1	1	1	2	3	2	3	3	1	2	4	2	1	4
2	2	1	1	3	1	1	1	1	3	3	2	2	3	2	2	2	2	1	2
2	2	1	3	2	2	2	2	1	2	2	2	2	3	2	2	3	2	1	2
2	4	2	3	3	1	2	1	1	3	3	3	1	3	1	2	2	3	1	2
1	2	1	2	4	3	1	1	2	2	3	3	2	3	3	2	3	2	2	2
2	1	2	1	4	1	2	1	1	3	4	4	1	4	3	1	4	4	1	4
1	2	1	2	3	2	2	4	1	2	3	3	1	3	2	2	4	4	1	3
1	2	1	2	4	1	1	1	1	1	1	1	1	4	1	1	4	4	1	4
2	1	1	2	1	2	1	1	1	1	2	2	2	2	2	1	2	2	1	2
2	3	1	1	2	1	1	1	1	2	2	2	1	3	1	2	3	3	1	2
3	1	2	3	3	3	1	1	1	2	3	3	1	1	1	1	1	2	1	2
2	1	1	1	4	4	1	1	2	3	4	4	2	3	1	2	3	2	1	3
2	1	1	2	2	4	1	4	2	4	2	3	2	2	1	1	3	2	1	3
2	2	1	1	2	4	1	1	2	3	4	3	1	4	1	3	2	1	1	4
4	2	4	1	4	3	2	1	2	3	3	4	4	3	3	3	1	4	1	4
2	2	1	2	4	2	1	1	1	3	2	2	2	2	1	2	3	4	2	2
2	2	1	2	3	2	2	1	1	1	3	1	2	3	2	1	2	2	1	2
3	2	2	2	4	3	3	1	2	3	4	4	1	4	1	3	4	4	1	4
2	1	2	1	2	2	1	1	1	2	2	2	2	4	2	3	4	3	1	2
2	2	2	1	1	2	2	1	1	1	1	2	2	1	1	2	2	3	1	1
1	1	1	1	3	3	1	1	1	2	2	2	2	2	2	2	2	3	1	3
1	4	1	1	4	4	1	1	1	1	4	4	1	4	1	4	4	4	1	1
2	1	3	3	1	2	1	1	1	1	2	2	2	2	2	2	2	2	2	2
1	3	1	3	3	2	1	1	1	1	3	2	1	4	1	2	3	3	1	3
4	2	2	3	1	2	1	2	2	4	1	2	2	1	3	1	1	1	2	1
1	1	1	1	1	1	1	1	1	1	1	1	1	2	1	3	4	3	1	4
1	3	1	1	2	1	1	1	1	2	2	4	2	3	1	2	2	2	1	3
3	2	3	3	3	3	3	3	3	3	3	3	3	3	3	3	3	3	3	3
2	2	1	2	3	1	1	1	1	3	1	1	3	1	3	1	1	2	1	2
3	2	2	3	2	1	1	3	2	4	2	1	3	2	3	1	2	2	1	3
2	2	2	2	2	2	1	3	1	3	1	2	2	3	1	2	2	2	1	2
1	4	1	1	1	2	2	1	1	2	2	2	3	2	3	2	2	2	1	3
1	4	3	1	4	1	1	1	1	1	4	4	1	4	1	4	4	4	1	4
1	2	1	1	3	1	1	1	1	2	3	1	2	2	1	1	3	2	1	3
1	3	1	1	2	1	1	1	1	1	1	3	1	1	1	1	1	1	1	4
1	2	1	1	4	3	1	1	1	1	3	3	1	3	1	1	3	3	1	4
3	2	2	3	2	3	1	1	2	4	4	1	3	2	2	1	3	2	2	2
1	1	2	2	3	3	1	1	1	2	3	2	1	3	1	3	3	3	1	3
1	4	2	2	3	2	2	1	2	3	3	3	2	3	1	2	2	3	1	4
2	4	2	4	2	4	1	3	2	2	2	3	4	4	4	3	3	2	1	3
1	3	1	1	3	2	1	1	1	1	3	1	1	4	1	1	4	4	1	4
2	3	2	3	4	2	1	4	2	3	2	3	3	3	2	2	2	3	4	2
1	2	1	1	4	2	1	1	1	1	3	2	1	4	1	2	2	4	1	4
2	2	2	1	3	2	1	1	2	1	3	2	2	1	1	2	2	2	1	2
1	2	2	2	3	4	1	2	2	3	3	4	4	4	3	2	4	4	1	3
2	2	1	2	2	3	1	1	1	2	3	3	2	3	2	2	3	3	1	2
3	1	2	2	3	1	1	4	1	3	3	1	2	2	2	2	2	2	1	2
2	1	1	2	3	1	1	1	1	1	3	1	2	3	1	1	2	2	1	1
3	1	2	3	1	1	3	3	1	3	3	2	2	2	3	2	1	2	2	2
2	3	1	1	3	2	1	1	1	1	3	2	2	4	1	2	4	4	1	4
1	1	1	2	3	2	1	2	2	2	3	2	1	2	1	2	1	2	1	3
1	2	1	1	3	2	1	1	1	1	3	2	1	3	2	2	1	2	1	2
1	2	1	1	4	4	1	1	1	1	3	1	1	1	1	1	1	1	1	1
1	2	1	1	3	2	1	1	1	1	2	2	1	3	1	2	3	2	1	3
1	1	1	1	4	1	2	1	1	1	4	2	1	2	1	2	2	2	1	4
1	3	1	1	3	2	2	1	1	2	3	3	1	4	1	2	3	4	1	3
2	2	2	2	3	3	2	1	2	3	2	2	2	3	2	2	3	3	1	3
3	4	3	3	3	2	2	2	3	3	3	2	3	2	2	2	3	2	3	2
1	1	1	1	4	1	1	1	1	2	3	1	1	2	1	1	1	1	1	2
2	1	1	1	4	2	1	1	1	1	3	3	2	2	1	1	2	2	1	4
2	1	1	3	2	1	1	1	2	3	1	1	1	2	2	1	1	2	1	1
3	2	3	1	2	2	1	1	1	4	3	1	2	4	3	3	3	2	1	2
1	1	1	2	3	2	1	1	1	2	2	2	2	2	3	2	1	2	1	3
2	1	2	1	4	1	1	1	1	1	3	2	1	1	1	2	2	2	2	2
2	2	1	2	2	2	1	2	1	2	3	1	1	2	1	3	2	2	2	3
2	3	2	1	3	3	1	4	1	2	3	3	3	4	2	1	4	4	1	4
2	1	1	2	2	2	2	2	1	3	2	2	3	3	2	2	2	2	1	3
2	2	1	1	4	3	1	1	1	1	3	2	1	3	1	2	3	3	1	4
3	1	1	2	3	2	1	2	1	2	3	3	2	3	1	1	4	4	1	2
4	4	4	4	4	3	4	1	4	4	4	4	4	4	4	3	4	4	4	4
1	1	1	1	3	1	1	1	1	1	3	1	1	1	1	1	1	3	1	1
2	3	2	1	4	3	1	1	1	2	3	3	3	3	1	1	3	3	1	4
2	4	1	3	2	2	1	1	1	2	2	2	2	4	1	2	2	2	1	3
1	2	1	1	4	2	1	1	1	1	1	1	1	2	1	1	1	2	1	1
3	2	2	2	2	3	1	2	2	2	2	2	2	3	3	3	3	2	1	4
2	1	1	2	3	2	1	3	1	3	2	1	2	2	1	1	2	2	1	2
2	1	1	2	2	1	1	1	1	1	1	1	1	1	1	1	1	1	1	1
2	2	2	2	2	2	2	2	2	2	2	2	2	2	2	2	2	2	3	2
2	2	1	2	3	1	2	1	1	2	3	2	2	2	2	2	2	2	2	2
1	3	1	1	3	3	1	1	1	1	3	2	3	4	1	2	4	3	1	1
2	2	2	2	2	2	1	1	1	2	2	2	1	2	2	2	2	3	1	2
1	1	2	2	3	3	1	1	1	2	4	3	2	3	1	2	3	3	1	4
3	3	4	3	3	1	1	2	2	2	1	1	3	3	2	2	2	2	2	2
3	3	1	2	3	1	1	2	1	2	2	3	2	2	1	1	1	1	1	2
3	2	1	1	4	2	1	1	3	3	2	2	1	2	1	2	2	2	1	1
1	2	1	1	3	3	1	1	2	1	3	4	4	4	4	3	3	3	1	3
2	2	1	3	3	1	1	3	1	3	2	1	2	3	1	2	2	2	1	2
1	4	1	2	4	2	1	1	1	1	3	3	1	4	1	3	4	3	1	4
1	1	1	1	4	4	1	1	1	1	4	4	1	3	1	3	2	3	1	4
1	3	1	1	4	2	2	1	1	1	3	2	1	2	1	2	2	3	1	3
2	3	2	2	2	2	3	3	2	3	3	3	2	2	2	3	2	2	3	3
2	2	2	2	2	1	1	2	2	2	2	2	2	2	2	2	2	2	3	2
2	2	1	2	3	2	2	1	1	2	3	2	1	3	1	3	3	3	1	3
2	2	1	1	1	3	1	1	2	2	2	3	3	3	3	4	2	2	3	3
3	1	1	2	1	1	1	1	2	3	2	2	3	2	2	2	1	1	3	2
1	2	1	1	3	1	1	1	1	1	4	3	1	4	1	2	3	3	1	3
1	2	1	2	3	1	2	1	1	1	3	2	2	4	1	3	2	3	1	1
3	1	2	3	3	1	2	3	2	3	2	2	2	2	3	2	2	2	1	2
2	1	1	1	3	4	1	1	1	1	3	1	2	2	1	1	2	2	1	1
2	1	2	1	4	4	1	1	2	1	4	4	1	4	1	4	4	3	1	4
1	3	1	1	4	1	2	1	1	1	3	3	1	4	1	2	1	1	1	4
2	1	1	1	2	1	2	1	1	1	1	1	1	1	1	1	1	1	2	1
2	3	2	3	3	2	3	1	2	1	3	3	2	1	3	2	2	2	1	3
1	3	1	3	3	4	1	1	2	1	4	4	1	4	1	2	4	4	1	4
3	1	1	1	4	1	1	4	3	4	2	2	2	3	3	1	3	2	1	4
1	1	1	1	4	2	1	2	1	1	4	4	1	4	1	2	4	4	1	4
3	4	3	2	1	1	1	1	1	1	2	1	1	2	2	3	3	3	3	2
1	3	2	2	2	2	2	2	2	2	2	2	2	2	2	2	2	2	2	2
1	3	2	2	2	3	2	2	3	1	3	2	1	2	2	2	2	2	2	2
2	4	2	2	3	2	1	4	2	2	3	1	2	3	2	3	2	2	3	3
2	3	1	1	3	1	1	1	2	2	2	1	1	1	2	2	2	2	2	2
1	1	1	2	3	3	3	2	2	3	2	2	1	3	2	2	2	3	1	2
1	3	1	1	1	1	1	1	1	1	1	1	1	1	1	1	1	1	1	1
2	2	2	2	2	2	2	2	2	2	2	2	2	2	2	2	2	2	2	2
1	2	1	1	2	2	1	1	1	1	3	2	2	3	1	2	2	3	1	1
1	3	1	1	1	1	1	1	1	1	4	4	1	4	1	4	4	4	1	4
1	1	1	1	1	4	1	1	1	1	1	1	1	1	1	4	1	4	4	4
1	1	1	1	1	1	1	2	1	1	1	1	1	1	1	1	1	1	1	3
1	4	1	1	1	1	1	1	1	1	4	4	4	4	1	4	4	4	1	4
1	1	1	1	1	1	1	1	1	1	1	1	1	1	1	1	1	1	1	1
1	2	1	2	2	2	1	3	1	2	3	1	1	3	2	1	3	3	1	3
3	1	2	3	1	1	4	3	2	4	1	1	3	2	2	2	2	2	2	2
1	1	1	1	3	2	1	1	1	2	3	2	1	3	1	3	3	3	1	3
2	1	1	2	3	4	1	2	1	2	1	2	1	4	2	1	3	3	1	3
2	1	1	3	1	3	1	1	2	3	2	2	1	3	1	3	3	3	2	2
1	2	1	1	3	1	2	1	2	2	2	2	2	3	2	1	3	3	1	2
1	2	1	3	2	1	2	1	1	2	2	3	2	3	2	2	3	4	1	3
1	2	1	1	1	2	1	1	1	1	2	1	1	2	1	2	2	2	1	2
1	1	2	1	2	1	2	1	1	1	1	1	1	1	3	1	2	2	1	3
2	1	1	1	4	2	1	1	1	2	3	3	1	3	1	1	2	3	1	3
1	2	2	3	3	1	3	1	2	3	3	1	2	4	1	2	2	3	1	4
2	4	1	2	2	2	1	1	2	1	1	3	2	4	2	1	2	3	1	3
3	3	3	3	2	3	3	3	2	4	4	3	3	2	1	3	3	4	4	2
2	2	2	2	2	2	2	2	2	2	2	2	2	2	2	2	2	2	2	2
1	3	1	1	1	1	1	4	1	1	1	1	1	1	1	1	1	1	1	1
2	2	2	2	2	2	2	2	2	2	2	2	2	2	2	2	2	2	2	2
2	1	2	3	2	2	3	3	2	2	2	2	2	2	2	2	2	2	2	2
1	2	1	1	1	1	1	2	1	1	3	1	2	1	2	4	3	2	1	4
1	1	1	1	2	1	1	1	1	1	1	1	2	2	1	1	2	2	3	2
2	2	1	2	1	3	1	1	1	1	2	2	1	2	1	2	2	2	2	2
1	1	1	3	3	1	4	1	4	4	4	1	1	1	1	1	1	1	1	1
2	2	4	1	1	1	1	1	1	1	1	1	1	1	1	1	1	1	1	1
1	2	1	1	3	3	1	1	1	1	3	1	1	3	1	3	3	3	1	4
1	3	1	1	2	1	2	1	2	1	3	2	1	3	1	2	3	2	1	1
2	1	2	2	2	3	4	3	2	3	2	2	3	4	2	2	3	3	1	2
1	1	1	2	4	1	1	1	1	2	1	1	1	2	1	1	1	1	1	1
1	3	1	1	3	3	1	1	1	1	3	2	1	4	1	1	3	3	1	3
1	2	1	1	1	3	1	1	1	1	2	1	1	3	1	1	1	2	1	1
2	2	1	1	4	2	1	2	1	3	3	4	2	4	1	2	3	3	1	3
1	1	1	2	3	1	1	1	1	2	1	1	1	4	1	1	2	2	1	1
1	3	1	1	3	3	1	1	1	1	3	3	1	3	1	2	3	4	1	3
1	2	1	1	3	2	2	3	1	2	3	3	2	2	1	3	2	3	1	3
1	1	3	2	1	2	2	3	1	2	4	3	1	4	1	2	2	2	2	4
1	2	1	1	3	2	2	1	1	2	3	3	2	4	1	3	4	3	1	3
1	1	1	1	1	1	1	1	1	1	1	1	1	4	1	2	3	4	1	4
2	1	1	4	2	1	1	2	1	2	2	2	2	1	1	2	1	1	1	1
1	2	1	1	3	2	1	1	1	1	3	3	1	4	1	4	4	4	1	4
1	2	1	1	4	1	1	1	1	1	4	2	3	4	1	2	4	4	1	4
1	2	1	2	1	1	1	3	1	2	2	1	1	1	1	1	3	3	1	4
2	2	1	1	4	4	1	1	1	1	4	4	1	4	1	4	4	4	1	4
1	2	1	1	4	4	1	1	1	1	3	2	1	4	1	2	3	3	1	4
1	4	1	1	3	2	1	1	1	1	4	4	1	4	1	4	2	3	1	4
1	3	2	1	3	4	2	2	2	3	2	2	1	4	2	3	4	4	1	4
2	2	2	3	3	3	2	1	1	2	2	2	2	3	2	2	2	2	1	2
2	3	2	2	1	3	2	1	1	2	2	2	2	3	1	2	3	2	1	2
2	2	2	2	3	2	1	2	2	3	3	2	1	2	2	2	2	4	1	2
1	3	1	1	2	3	1	2	2	1	3	2	1	3	1	4	3	3	1	3
2	2	1	1	3	2	1	1	1	2	3	3	1	3	3	2	2	3	1	3
2	2	1	1	3	1	2	1	1	2	3	2	1	3	1	1	1	2	1	1
4	1	3	4	1	1	2	1	4	4	1	4	4	1	1	1	1	2	1	1
1	2	1	1	4	2	2	2	2	2	3	2	1	4	2	2	2	4	1	4
2	3	1	1	3	2	3	1	1	2	3	4	2	3	1	2	4	3	1	3
1	3	1	1	1	3	1	1	1	2	2	3	1	3	1	2	2	3	1	3
2	2	1	2	3	3	1	1	2	3	3	2	1	3	1	1	3	3	1	3
1	2	1	1	2	3	2	3	1	1	3	3	1	4	1	2	4	4	1	4
2	1	1	1	3	2	1	1	1	1	4	3	2	3	2	2	2	3	1	3
1	1	1	1	1	1	1	1	1	1	1	1	1	1	1	1	1	1	1	1
1	2	1	1	4	3	1	1	1	1	4	4	1	3	1	3	3	3	1	4
2	2	2	2	2	2	2	2	2	2	2	2	2	2	2	2	2	2	2	2
4	3	4	4	4	4	3	3	4	4	4	4	4	4	4	4	4	4	4	3
1	1	1	2	1	2	2	1	3	3	3	3	3	2	1	2	3	3	2	3
3	4	1	1	1	2	1	1	2	2	2	3	2	4	2	3	2	2	1	4
2	3	1	1	3	4	1	1	1	1	4	2	2	4	1	3	4	4	1	4
1	4	1	1	3	3	1	1	1	2	3	3	1	4	1	3	4	4	1	4
3	3	3	3	3	3	3	3	3	2	2	2	2	2	2	2	2	3	3	3
2	1	1	1	1	1	1	1	1	3	1	1	3	3	3	1	1	2	1	3
2	2	1	2	3	2	1	1	1	2	4	3	1	4	1	3	4	3	1	3
1	3	1	4	4	4	2	1	1	2	4	1	1	2	1	2	4	2	1	2
2	2	3	3	3	2	2	1	2	2	3	2	3	2	2	2	3	3	2	3
1	1	1	1	1	1	2	1	1	1	2	2	1	3	2	2	2	2	3	2
2	2	2	2	2	1	1	1	1	1	1	1	1	2	1	1	2	1	1	3
3	4	4	2	1	4	2	2	2	1	1	1	1	4	1	1	4	4	4	4
2	1	1	2	2	1	2	3	2	2	2	2	2	2	2	2	2	2	2	2
3	3	2	4	2	1	1	1	2	4	1	1	2	3	1	1	2	2	2	2
2	1	2	2	1	1	2	2	1	3	2	1	2	3	2	1	1	1	1	2
1	2	1	1	2	2	1	1	1	2	4	2	1	4	1	2	2	3	1	3
3	1	2	3	3	1	1	2	2	3	3	2	3	2	3	3	1	2	2	3
1	2	2	2	1	1	1	1	1	1	3	2	1	3	1	2	4	4	1	4
1	4	1	1	4	4	1	2	1	2	1	2	1	1	1	1	4	4	1	4
2	2	1	1	4	4	1	1	2	2	3	3	1	2	1	4	3	3	1	4
2	2	2	2	1	2	1	2	2	2	2	1	2	3	1	2	3	3	2	3
1	1	1	1	4	4	2	1	1	2	4	4	4	4	1	4	4	4	1	4
2	3	1	1	4	4	1	1	1	2	4	4	4	4	3	3	1	1	1	1
3	1	2	2	2	3	1	2	2	3	3	2	2	2	3	1	2	2	1	3
2	1	1	2	1	1	1	1	1	1	1	1	1	2	1	1	1	1	1	1
2	3	2	2	2	2	1	1	1	2	2	2	2	3	1	2	2	2	3	3
1	3	1	2	3	3	1	1	1	1	2	2	1	3	1	2	2	3	1	3
2	3	1	1	3	2	2	1	1	2	3	2	2	3	1	2	3	3	1	3
1	2	2	2	3	2	1	1	3	2	2	2	3	3	3	2	1	2	1	2
3	1	3	1	1	1	2	1	2	3	2	2	3	3	2	2	3	2	1	2
1	4	1	1	3	1	1	1	1	1	4	4	1	4	1	3	4	4	1	4
2	2	1	2	2	2	2	1	1	1	3	2	1	4	1	2	3	4	1	3
1	2	1	3	3	2	4	2	1	1	4	2	1	3	1	2	3	3	3	3
1	1	1	1	3	3	1	1	1	2	2	3	2	3	2	2	2	2	1	2
2	2	3	1	1	2	1	1	1	2	1	1	1	2	1	1	1	3	1	1
1	2	1	1	2	1	2	1	2	1	2	2	2	2	1	1	3	3	1	3
1	3	1	2	4	1	2	1	2	2	4	3	2	3	1	3	3	4	1	4
1	2	1	2	3	3	2	1	1	3	3	3	1	2	1	3	3	3	2	3
2	2	2	2	2	2	2	2	2	2	2	2	2	2	2	2	2	2	2	2
2	2	1	2	2	2	1	2	1	2	2	2	1	3	2	3	3	3	1	3
2	1	1	4	3	2	1	1	1	4	3	2	1	3	1	2	2	3	2	3
2	1	1	1	4	1	1	4	1	1	4	4	1	4	1	3	4	4	1	4
1	2	1	1	4	1	1	1	1	1	4	4	2	3	1	2	2	3	1	4
3	4	2	1	4	4	1	1	1	4	3	3	2	4	4	4	2	2	3	4
1	2	1	1	4	4	1	1	1	1	4	3	1	4	1	3	4	4	1	4
1	1	1	1	3	2	1	2	2	3	3	1	3	2	2	2	2	3	1	2
1	2	1	2	2	2	1	1	1	1	1	1	2	1	1	3	2	2	1	1
1	3	1	3	4	3	1	1	1	1	4	2	3	3	1	1	2	3	1	4
2	2	1	2	3	4	1	1	2	2	3	3	2	3	1	2	2	1	1	3
1	3	1	2	3	2	1	1	1	2	3	3	2	3	1	2	4	3	1	3
1	1	1	2	3	3	1	2	2	2	1	3	1	2	2	1	2	1	1	2
1	3	1	1	2	2	1	1	1	2	2	2	2	3	1	2	4	3	1	3
2	2	1	2	2	1	1	2	1	3	2	1	2	2	2	2	3	3	1	2
1	3	2	2	2	2	2	2	2	2	2	2	2	2	2	2	2	2	2	2
2	1	1	1	1	2	1	1	1	1	1	1	1	1	1	1	2	2	2	2
3	1	1	1	1	1	1	1	1	1	1	1	1	2	1	1	1	1	1	1
1	1	1	1	1	1	1	1	1	1	1	1	1	1	1	1	1	1	1	1
2	2	2	2	3	2	2	1	1	3	2	2	2	2	2	2	2	2	2	2
2	2	2	2	2	2	2	2	2	2	2	2	2	2	2	2	2	2	2	2
2	2	2	1	3	1	1	1	1	1	2	1	2	2	2	2	2	1	1	3
2	4	1	4	2	2	2	2	2	2	2	2	2	2	2	2	2	2	1	2
2	2	1	2	2	2	2	2	2	2	2	2	2	2	2	2	2	2	2	2
2	3	1	3	2	1	1	1	2	2	4	2	1	2	2	2	2	2	2	2
1	1	1	1	1	4	1	1	1	1	1	1	1	1	1	1	1	1	1	1
2	1	2	2	2	2	2	2	2	2	2	2	2	2	2	2	2	2	2	2
2	2	1	2	4	2	2	1	1	2	3	3	1	2	1	2	3	2	2	3
2	1	2	2	3	1	1	1	1	1	3	2	2	3	1	1	3	3	1	3
2	3	2	2	2	3	3	2	2	2	2	2	2	3	1	3	3	3	1	3
2	1	2	1	3	1	1	1	1	2	2	2	2	2	2	2	2	2	2	2
2	1	2	2	3	1	2	2	2	3	2	2	2	1	3	2	3	3	1	3
2	2	2	2	2	2	2	2	3	3	2	2	2	2	2	2	2	2	2	2
1	2	1	1	2	1	2	1	1	2	2	1	2	2	2	1	2	3	2	2
3	1	2	3	3	3	2	2	2	3	3	2	2	3	2	3	2	2	1	3
1	3	1	1	4	2	2	1	1	1	4	4	1	3	1	4	3	3	1	3
2	1	1	3	2	2	1	1	1	2	1	3	2	1	1	2	1	3	1	3
2	1	1	2	3	2	2	1	1	2	2	2	3	2	2	1	2	1	1	1
2	2	2	1	2	2	2	2	2	2	3	3	1	2	1	2	2	2	1	3
2	2	1	1	3	2	2	1	2	2	2	3	2	3	2	1	2	2	1	2
1	1	1	3	3	1	1	2	1	3	3	1	1	3	2	2	2	1	1	1
2	2	1	1	3	2	2	2	2	2	2	2	2	1	2	1	1	2	1	2
3	4	1	1	1	2	1	1	1	1	4	3	1	3	1	1	3	3	1	1
2	2	2	2	2	3	2	1	2	4	3	3	1	2	1	2	3	3	1	3
3	2	1	2	3	2	1	2	2	3	2	4	2	2	2	1	2	2	1	3
2	2	1	3	1	2	2	1	1	3	1	4	3	1	2	3	2	2	1	2
2	2	2	2	2	2	1	2	2	2	2	3	2	2	2	1	1	1	2	1
3	1	2	2	3	2	2	2	1	3	2	2	1	3	1	2	2	2	1	4
1	3	1	1	4	1	1	1	1	1	4	4	1	4	1	4	1	4	1	1
2	2	1	3	4	2	1	1	1	3	3	3	2	2	1	2	2	2	1	3
1	2	1	1	4	2	2	1	1	2	2	2	2	3	2	3	3	3	1	3
1	1	1	1	3	4	3	1	1	2	1	1	1	1	1	1	1	3	1	1
2	4	1	4	4	4	2	1	1	2	3	3	1	4	2	4	4	2	1	4
1	2	1	1	3	2	2	2	2	1	3	3	1	4	2	3	3	3	1	3
2	1	1	1	4	1	1	1	1	2	4	2	1	1	1	2	2	4	1	3
1	1	2	1	3	2	2	1	2	1	3	3	1	2	2	2	2	2	1	1
2	2	2	3	2	3	4	3	1	2	1	2	2	2	2	2	1	2	1	2
3	1	3	1	4	2	1	2	1	3	3	2	2	2	2	2	2	2	2	3
2	2	2	2	3	1	1	2	1	1	3	3	1	3	1	3	3	3	1	3
2	2	2	2	2	1	1	1	1	2	2	1	2	2	2	2	1	2	2	2
1	2	1	1	3	4	1	1	1	1	3	3	1	1	1	3	4	4	1	4
1	2	1	1	3	2	2	1	2	2	2	2	2	2	3	2	2	2	1	2
2	2	1	1	3	2	2	2	1	1	3	1	1	2	1	3	2	2	1	3
1	1	1	2	4	4	2	1	1	1	4	3	2	4	1	3	4	4	1	4
1	1	1	2	3	1	1	3	2	2	2	2	2	2	1	2	2	3	1	4
1	2	1	2	2	2	1	2	1	2	3	3	1	4	2	1	3	4	1	3
1	1	1	1	1	2	1	1	1	1	3	3	1	3	1	4	2	4	1	2
1	2	1	1	1	2	1	1	2	1	1	1	2	4	2	2	4	4	1	4
1	2	2	1	1	1	1	1	1	3	4	4	2	4	2	1	4	4	1	4
1	2	1	1	3	2	1	1	1	2	3	2	2	4	1	2	2	4	1	4
2	4	2	1	4	3	1	1	1	2	4	2	2	4	2	2	4	4	1	4
1	3	1	1	4	1	1	1	1	1	1	1	1	1	1	1	1	1	1	3
1	3	1	1	2	3	2	1	1	1	3	4	1	4	1	2	4	4	1	4
2	2	2	2	2	4	2	1	1	4	3	4	2	2	1	3	3	2	1	3
1	2	1	2	3	1	2	1	1	2	2	2	1	4	2	2	2	3	1	3
2	3	2	2	3	2	1	1	2	2	4	4	2	4	1	1	2	3	1	2
1	1	1	1	3	1	1	1	1	4	3	4	2	2	2	4	4	4	1	4
1	3	1	2	3	2	1	1	1	1	3	1	2	4	1	2	3	2	1	3
1	3	1	1	1	2	1	1	1	1	2	1	1	3	1	1	1	3	1	1
1	2	1	2	3	2	1	1	1	2	3	2	2	3	2	2	2	2	1	3
2	1	1	2	2	2	3	2	1	3	2	3	2	2	2	1	2	3	1	3
1	3	1	2	2	2	2	1	1	1	3	2	1	3	1	3	3	3	1	3
1	3	1	2	4	1	1	1	1	1	1	1	2	2	1	2	2	4	1	4
2	4	1	1	3	1	1	1	1	1	2	1	1	3	1	2	2	2	1	3
2	2	1	2	3	2	1	2	1	2	3	2	1	2	1	2	2	3	2	2
2	2	1	2	2	3	2	1	1	2	4	3	2	4	1	3	4	4	1	4
2	1	3	2	1	1	2	2	1	2	1	2	2	2	1	3	2	2	1	2
3	2	2	3	1	1	4	3	3	3	1	1	3	4	3	3	1	1	4	3
1	2	1	1	3	2	1	1	2	1	4	3	1	4	1	3	4	4	1	4
1	2	1	1	3	2	1	1	1	1	3	2	1	3	1	2	2	3	1	2
1	2	1	3	3	3	3	2	2	3	2	3	1	3	1	2	3	3	1	3
2	4	1	1	3	2	1	3	1	1	4	3	2	4	1	1	2	2	1	4
2	3	2	1	3	2	1	1	1	1	3	3	2	2	2	2	2	2	1	2
3	2	2	2	2	2	2	2	2	2	3	2	2	2	2	2	2	2	2	2
1	1	1	2	1	1	2	1	1	3	2	2	2	2	2	2	3	2	1	3
2	1	2	2	2	2	2	2	2	2	2	2	2	2	2	2	2	2	2	2
3	3	3	1	3	1	1	1	1	2	2	2	2	2	2	2	2	2	2	2
3	3	1	2	2	2	2	2	2	2	2	2	2	2	2	2	2	2	2	2
1	2	2	2	2	2	2	1	2	2	2	2	2	2	2	2	2	2	2	2
1	3	1	3	1	4	1	2	1	2	1	2	1	3	2	2	3	3	1	3
2	1	1	1	3	1	2	1	2	2	4	3	2	3	2	2	3	3	1	4
2	2	2	3	3	2	1	1	1	3	1	2	2	2	2	2	2	2	1	3
2	2	2	2	2	2	2	2	2	2	2	2	2	2	2	2	2	2	2	2
4	2	4	4	3	3	2	2	3	4	1	3	4	2	4	2	1	2	2	3
1	3	1	1	2	2	1	2	2	2	2	2	2	2	2	2	3	3	1	2
1	2	2	2	2	2	2	2	2	1	3	2	2	3	2	2	2	2	1	4
3	3	3	2	3	2	1	4	2	2	2	2	2	2	3	3	1	1	1	4
2	2	1	1	1	2	1	2	1	3	2	2	1	3	2	1	2	2	1	2
2	4	1	1	4	1	3	2	1	4	3	4	2	4	1	2	4	4	1	4
1	1	4	1	4	1	4	1	1	1	4	4	1	4	1	4	4	4	1	4
2	2	2	2	2	2	1	2	1	2	2	2	2	2	2	2	2	2	2	2
2	1	1	2	2	1	1	1	1	1	1	1	1	3	2	1	4	3	1	2
1	2	1	2	3	1	2	1	1	1	3	2	2	4	1	3	3	4	1	4
1	2	1	2	3	1	1	1	1	2	2	3	2	3	2	2	3	3	1	3
1	2	2	2	3	3	2	1	1	2	2	3	1	3	2	2	2	4	1	3
1	3	1	1	3	2	2	1	1	1	3	4	1	4	1	3	4	4	1	4
1	2	1	2	2	2	1	2	1	1	2	3	1	4	2	2	3	4	1	2
2	1	1	1	1	4	2	1	1	3	1	3	1	2	3	3	3	3	1	3
2	2	2	2	4	3	1	1	1	2	3	2	2	3	3	3	3	3	2	4
2	2	2	2	2	2	1	2	2	3	2	2	2	2	2	2	2	2	1	2
2	2	2	1	2	2	2	1	2	2	2	2	2	2	2	2	2	2	2	2
1	2	1	2	2	1	2	1	1	2	2	2	1	2	1	2	2	2	1	2
1	2	2	2	3	1	1	2	1	3	3	3	2	2	2	2	2	2	1	3
1	2	1	1	3	2	1	1	1	1	1	1	1	2	2	2	2	1	1	2
1	2	1	3	3	4	2	2	3	3	2	4	2	4	2	3	3	4	1	3
1	1	1	1	3	1	3	3	1	3	3	3	1	3	2	1	3	3	1	3
2	3	2	1	3	1	1	2	2	2	2	3	2	3	2	2	3	2	1	2
1	2	1	2	4	1	2	1	2	2	3	3	2	2	2	2	2	2	1	3
1	3	2	1	1	1	1	1	1	1	3	3	2	3	3	3	3	3	1	4
1	3	1	1	3	2	1	1	1	1	4	3	1	4	1	3	4	4	1	4
2	1	1	1	4	2	1	1	2	1	4	3	1	2	1	4	3	3	1	2
3	2	3	1	3	2	2	1	2	3	2	2	3	2	2	2	1	2	2	3
1	3	1	1	4	4	1	1	1	1	1	1	1	4	1	4	3	4	1	4
3	1	1	3	2	2	1	2	4	4	1	3	3	1	4	1	1	1	1	1
2	2	2	3	3	1	2	3	1	3	3	3	3	2	2	1	1	1	2	3
2	1	1	1	3	2	1	1	2	2	2	2	2	2	1	1	1	2	1	2
1	2	1	1	1	2	1	1	1	1	2	2	1	3	1	3	4	4	1	1
2	1	1	1	1	1	1	1	1	2	1	2	2	2	1	1	2	1	2	1
2	2	1	2	2	1	2	3	1	2	3	3	2	3	1	1	2	2	1	3
2	2	2	2	2	2	2	2	2	2	2	2	2	2	2	2	2	2	2	2
4	1	2	3	3	1	2	1	1	3	2	1	1	2	1	1	1	1	1	1
2	1	1	2	3	1	2	1	1	3	2	2	3	3	2	1	3	3	1	3
1	3	1	1	4	1	1	2	1	3	1	2	2	4	1	2	2	2	1	3
2	3	1	1	1	1	2	1	1	2	2	2	1	4	1	2	4	4	1	4
2	1	1	2	2	1	2	2	1	2	2	3	2	1	1	1	3	2	1	3
2	2	1	2	3	3	1	1	2	3	1	2	2	4	1	2	3	3	1	3
1	3	1	2	3	1	1	1	1	2	2	3	2	3	1	3	2	3	1	3
2	2	1	2	3	1	1	1	1	3	3	2	2	2	3	3	2	2	1	3
2	3	1	1	4	1	2	2	1	3	4	4	1	4	3	3	2	4	1	4
2	2	1	3	4	4	1	2	1	4	3	3	2	2	1	2	2	3	1	3
1	3	1	2	3	2	2	1	1	1	2	3	1	3	1	3	3	3	1	3
1	3	1	2	3	2	1	1	1	3	2	2	2	2	2	1	3	2	1	2
1	2	1	2	3	1	1	1	2	2	2	2	2	3	2	1	1	3	1	2
2	1	1	1	4	4	1	1	1	2	2	1	3	1	2	2	1	1	1	2
2	1	1	1	4	1	2	1	1	2	2	1	2	2	2	1	2	2	2	3
1	1	1	1	1	1	1	1	1	1	2	1	1	1	1	1	1	4	1	1
2	2	1	1	3	2	1	1	1	1	3	2	2	2	2	2	2	2	2	2
1	1	1	1	1	4	1	1	1	1	4	1	1	4	1	1	4	4	1	4
2	3	1	1	3	3	1	2	1	2	2	2	1	3	1	2	2	3	1	3
2	1	1	1	1	2	2	1	1	2	1	2	2	3	1	2	4	3	1	4
1	3	1	1	4	4	2	1	1	2	4	2	2	3	1	2	3	4	1	4
1	3	1	2	3	1	3	1	1	1	1	1	1	2	1	1	1	1	1	2
2	1	1	1	1	1	1	1	1	2	1	1	1	1	1	1	1	1	1	1
2	3	2	1	3	3	3	2	2	2	2	2	2	2	2	2	2	2	2	2
2	2	2	2	2	2	2	2	2	2	2	2	2	2	2	2	2	2	2	2
3	2	2	1	4	1	2	2	2	2	2	2	2	2	2	2	2	2	1	2
3	3	2	1	3	3	1	1	1	1	1	1	1	3	2	2	2	2	2	2
2	2	1	4	3	3	2	2	2	2	4	3	2	4	1	3	3	3	1	3
4	2	2	1	1	1	1	2	2	2	2	2	2	2	2	2	2	2	2	2
2	1	1	2	3	2	1	1	1	2	2	3	2	1	1	2	2	1	1	2
2	2	2	2	2	2	2	2	2	2	2	2	2	2	2	2	2	2	2	2
2	1	1	2	4	4	1	1	2	2	3	4	2	2	1	2	2	2	1	4
2	4	1	1	4	1	1	1	1	1	1	1	1	1	1	4	4	4	1	4
2	2	1	1	3	1	2	1	1	2	2	2	2	3	1	1	2	2	2	3
1	1	1	2	3	1	1	1	1	3	3	3	1	2	1	2	2	2	1	3
2	2	1	3	4	4	4	4	4	4	2	3	4	2	3	4	4	4	4	4
1	2	1	1	4	4	1	1	1	1	4	3	1	4	2	3	4	4	1	4
2	1	1	1	3	2	1	1	3	3	2	2	2	2	2	2	2	2	1	2
1	1	2	2	3	3	1	1	1	1	4	2	1	3	1	2	2	4	1	4
2	2	3	3	2	4	1	4	2	2	2	2	2	4	2	2	3	4	1	2
2	1	1	1	1	1	1	1	2	2	2	2	2	2	2	2	2	2	2	2
2	2	2	3	2	2	1	1	2	3	2	2	2	3	1	1	2	2	2	2
4	1	1	1	2	2	1	1	2	2	2	2	2	2	1	1	2	2	1	2
2	2	1	2	2	1	1	1	1	1	3	3	1	4	2	4	3	3	1	3
2	3	1	1	3	2	1	1	1	1	3	3	2	2	1	1	2	1	1	1
2	3	1	2	2	2	1	4	1	4	4	2	2	4	2	2	4	1	1	2
3	3	2	3	3	1	2	3	2	3	2	2	2	1	1	2	1	2	2	2
1	2	1	1	3	1	1	1	1	1	4	4	1	3	1	2	2	2	1	2
3	4	2	3	4	3	1	1	1	2	2	1	1	1	2	1	2	1	1	1
3	2	4	4	4	4	1	4	2	4	1	1	4	3	4	1	2	2	3	2
2	2	1	2	4	2	1	1	2	1	2	1	1	3	1	2	3	3	1	3
1	1	1	2	2	2	2	2	2	2	2	2	2	2	3	2	2	2	2	2
1	3	1	1	1	1	1	1	1	1	2	2	2	3	1	2	1	3	1	1
2	2	1	1	3	4	1	1	1	1	3	4	2	2	3	2	3	3	3	3
1	2	1	2	4	2	1	2	2	2	4	3	3	3	1	2	4	4	1	4
2	3	1	2	4	4	1	1	1	2	2	4	2	3	3	2	3	3	2	4
1	2	2	1	2	2	1	1	1	2	2	2	1	2	1	3	2	2	1	4
1	1	1	1	4	4	1	1	1	1	4	3	1	4	1	4	4	4	1	4
2	1	3	2	2	1	2	3	1	3	2	1	3	1	1	1	1	1	4	2
1	3	1	2	3	1	1	1	1	1	2	4	1	2	1	1	2	1	1	4
2	1	1	3	3	1	1	1	1	3	2	1	2	1	2	2	1	3	1	2
1	1	1	1	1	1	1	1	1	1	1	1	1	1	2	1	1	3	1	4
1	3	1	2	4	1	2	1	1	1	3	4	3	1	1	2	1	1	1	4
1	4	1	1	4	4	1	1	4	4	4	4	1	4	1	4	4	4	1	4
1	1	1	1	4	1	1	1	1	1	4	3	1	1	1	1	1	2	1	4
1	2	1	2	3	2	1	1	1	1	3	3	1	2	1	2	2	3	1	4
1	4	1	2	4	4	2	2	1	1	4	4	1	4	1	1	4	4	1	4
1	2	1	2	3	3	1	1	1	1	3	3	1	4	1	1	4	4	1	4
2	3	1	1	3	1	2	1	1	2	3	4	2	3	2	3	3	3	1	3
3	1	1	2	2	1	2	1	1	2	3	2	2	2	1	1	2	1	1	1
1	1	1	1	4	1	1	1	1	2	2	2	1	2	1	2	2	2	1	2
1	1	1	2	3	3	1	1	1	1	3	3	1	1	1	3	3	2	1	3
3	2	2	1	2	3	2	2	2	3	2	3	2	3	3	2	3	3	2	3
2	1	1	2	1	1	1	1	1	1	1	1	1	1	1	1	1	1	1	1
4	4	4	4	4	1	1	1	1	1	1	1	1	1	1	1	1	1	1	1
2	1	1	4	3	4	1	1	1	4	1	2	2	4	2	2	2	2	2	2
1	4	1	1	4	4	4	1	1	1	4	4	2	4	1	4	4	4	4	4
1	3	1	3	3	3	3	1	1	1	3	1	2	3	1	3	3	3	1	1
1	4	1	1	4	4	1	1	1	1	4	4	1	4	1	4	4	4	1	4
1	1	1	1	1	1	1	1	1	1	2	1	1	1	1	2	1	1	1	1
1	3	1	1	1	3	1	1	1	1	4	3	1	4	1	3	4	4	1	4
1	1	1	1	4	2	2	1	2	1	3	2	1	3	1	3	2	2	1	3
2	2	2	2	2	2	2	2	2	2	2	2	2	3	2	2	3	2	3	2
2	1	2	2	2	1	1	2	2	2	4	2	2	1	1	2	2	2	1	2
2	1	1	2	3	1	1	1	1	1	1	1	1	1	1	1	1	1	1	1
2	3	2	1	3	2	1	2	2	2	2	2	2	2	2	2	2	2	2	2
1	4	1	1	1	1	1	1	1	1	4	4	1	4	1	4	4	4	1	4
1	2	1	1	1	1	2	1	2	2	3	2	2	4	2	1	2	3	1	3
2	1	1	1	4	1	1	1	1	1	4	2	1	4	2	3	4	4	1	4
1	2	1	1	4	2	1	1	1	2	3	2	2	3	1	3	2	2	1	3
1	2	2	1	4	2	2	1	1	2	3	3	2	4	3	2	3	2	1	3
1	3	1	1	4	4	1	1	1	1	4	4	1	4	1	1	3	4	4	4
1	1	1	1	4	1	1	1	1	1	4	4	1	4	1	4	4	4	1	4
2	3	1	1	3	2	1	2	1	1	3	3	1	3	3	2	3	3	1	3
2	3	1	1	4	2	1	1	1	2	3	3	1	3	1	2	2	3	1	3
3	1	4	4	1	2	1	1	3	3	2	1	3	1	1	2	1	1	4	1
2	2	1	4	2	3	4	3	2	2	1	2	2	4	2	2	4	3	1	2
2	3	1	1	3	2	1	1	1	2	2	2	2	2	3	3	2	2	2	2
2	3	1	1	4	2	2	1	1	1	4	3	4	2	1	2	2	2	1	2
1	1	1	1	4	3	1	2	2	4	2	3	3	2	1	3	2	3	1	3
1	1	1	2	4	4	1	1	1	2	4	3	2	4	1	4	4	4	1	4
2	2	2	2	2	1	1	1	1	1	1	1	1	1	2	2	2	2	2	2
2	2	1	3	2	1	1	1	2	3	2	2	2	2	3	3	2	2	1	1
1	2	2	1	3	4	1	1	1	1	1	1	1	1	1	1	4	3	1	1
2	3	2	2	2	2	2	2	2	2	2	2	2	2	2	2	2	2	2	2
1	1	1	2	3	1	1	1	1	1	3	3	1	2	1	1	2	2	1	3
2	2	1	2	2	1	1	1	1	3	3	3	3	3	3	1	3	3	2	2
2	2	1	1	2	1	2	1	1	1	2	2	2	2	2	2	2	2	1	2
2	3	2	2	3	2	2	2	2	2	2	2	2	2	2	2	3	3	1	3
1	1	3	2	2	4	2	3	1	3	2	2	2	3	3	3	3	3	1	3
2	2	2	2	2	2	2	2	2	2	2	2	2	2	2	2	2	2	2	2
3	2	3	4	4	3	1	2	1	4	1	3	3	1	1	2	2	1	1	4
1	1	1	1	4	4	1	2	1	2	3	4	2	4	3	3	4	4	1	4
3	1	2	2	4	2	2	1	1	4	2	2	2	2	2	2	2	3	1	2
2	2	1	1	3	3	1	1	1	1	3	2	2	2	1	1	2	2	1	2
2	1	3	2	2	2	3	2	2	2	2	3	3	2	1	1	2	2	1	1
2	1	2	1	3	1	1	1	1	1	1	2	2	3	1	2	2	3	2	3
1	2	1	1	4	4	1	1	1	1	4	4	1	2	1	2	2	3	1	4
2	2	2	1	1	2	1	2	2	3	4	3	2	3	2	2	2	3	2	3
1	2	1	1	1	1	1	1	1	1	1	1	1	2	1	1	3	3	1	3
4	2	2	2	2	2	2	3	2	2	2	1	1	1	3	2	1	2	2	3
2	3	1	1	1	3	2	1	1	1	1	1	1	3	1	1	3	3	1	3
1	2	2	1	3	2	1	2	2	3	2	2	3	3	2	2	2	3	1	3
2	2	1	2	3	2	3	2	2	3	3	3	2	4	2	1	3	3	1	3
1	2	1	1	1	1	2	1	1	2	3	2	2	3	1	3	3	3	1	3
2	2	2	2	3	1	1	1	2	2	2	2	3	3	3	2	2	2	1	3
2	2	1	2	3	1	1	1	2	3	3	2	2	3	2	2	2	2	1	3
2	2	1	1	1	1	2	1	1	2	2	1	1	3	2	1	3	4	1	2
1	2	1	1	1	2	1	2	1	1	1	1	2	4	1	1	3	4	1	2
3	2	2	3	3	1	1	1	1	4	1	1	1	1	2	1	1	1	2	1
2	3	1	1	3	2	2	1	1	1	3	2	2	3	1	2	3	3	1	2
2	2	3	2	2	2	2	2	2	2	3	2	2	2	2	2	2	2	2	2
2	3	1	1	4	4	2	3	1	2	2	3	2	4	2	4	2	2	1	4
2	2	2	2	3	3	2	2	1	1	3	2	3	4	1	3	3	3	2	3
2	2	2	2	3	2	1	1	1	3	2	2	3	2	2	1	1	2	3	3
1	2	1	1	4	3	1	1	1	1	2	2	1	3	1	2	3	3	1	4
1	2	1	3	3	1	1	2	2	2	3	2	2	3	2	2	2	2	2	2
2	1	2	2	2	1	1	1	1	3	2	2	3	2	2	1	1	1	1	4
2	2	2	1	2	1	1	1	1	2	3	2	1	3	1	1	3	3	1	3
1	3	1	1	3	1	1	1	1	1	3	3	1	3	1	2	3	2	1	2
3	2	2	3	4	2	1	1	2	3	2	2	3	2	3	3	2	2	3	2
2	2	2	2	1	2	1	1	1	3	2	2	1	3	1	2	3	4	1	3
2	2	2	2	2	2	2	2	2	2	2	2	2	2	2	2	2	2	2	2
1	2	1	2	4	3	2	1	1	2	4	2	2	3	1	2	3	4	1	4
1	1	1	1	1	1	1	1	1	1	2	3	1	3	2	2	2	3	1	3
2	2	1	3	3	2	1	1	1	2	2	1	2	2	1	2	2	1	1	2
1	2	1	2	3	1	2	1	1	2	3	3	1	3	1	1	3	3	1	3
2	2	1	2	3	3	1	1	1	1	3	3	3	2	3	3	2	2	2	2
2	3	1	3	4	3	1	1	1	1	4	4	2	3	1	2	4	3	1	4
3	2	3	1	3	2	1	1	2	2	3	3	3	2	3	2	2	2	1	3
2	2	2	2	2	2	3	2	2	1	2	3	2	2	2	3	2	1	2	2
2	1	3	2	1	2	2	1	1	2	2	3	2	2	2	2	2	2	2	3
3	3	2	3	2	2	3	4	3	3	3	2	2	3	2	2	2	2	2	3
2	2	2	2	3	2	1	1	1	3	3	1	2	2	2	2	3	2	2	2
2	2	2	2	2	2	2	2	2	2	2	2	2	2	2	2	2	2	2	2
3	3	2	3	3	3	3	3	3	3	3	3	2	3	3	3	3	3	3	3
2	2	2	2	2	2	2	2	2	2	2	2	2	2	2	2	2	2	2	2
4	3	3	4	2	3	4	2	3	4	2	4	2	4	4	2	3	2	2	2
2	4	1	2	3	3	2	1	1	2	3	3	2	3	2	3	3	3	1	3
2	2	2	2	3	4	3	2	2	3	3	3	2	3	2	2	2	3	2	3
2	1	1	3	1	3	1	1	1	3	2	1	1	2	2	1	2	1	2	2
1	1	2	2	2	3	2	2	2	2	2	2	3	2	2	2	2	3	1	4
2	3	1	3	3	2	1	2	2	3	2	4	2	2	2	2	2	2	2	2
2	4	1	2	3	3	4	1	2	2	2	2	2	4	2	2	2	2	1	4
1	1	1	2	2	2	1	2	2	3	2	2	2	2	1	1	2	2	2	2
2	1	1	2	4	3	1	1	1	2	3	2	1	3	1	4	3	3	1	3
1	2	1	2	2	3	1	1	2	2	2	3	2	3	1	2	3	3	1	3
1	2	1	2	3	1	1	1	1	2	1	3	2	3	1	1	2	2	1	2
2	2	2	2	2	2	1	2	2	2	3	2	2	3	2	2	2	2	2	2
2	2	2	2	2	1	2	1	2	3	2	2	2	3	2	2	2	2	1	2
2	1	1	1	3	2	1	1	1	1	3	3	1	3	1	2	2	2	1	2
1	1	1	2	3	1	1	1	1	2	3	3	1	3	1	1	2	2	1	2
4	2	2	2	4	4	2	2	2	3	3	4	3	2	2	1	1	2	1	4
3	3	1	3	3	2	2	2	3	2	3	2	3	2	3	3	2	2	2	3
2	2	3	2	4	2	2	1	1	3	1	2	3	1	2	2	2	2	2	2
2	2	1	2	4	1	1	3	2	2	3	3	2	3	2	2	3	3	2	4
2	3	2	2	1	1	2	3	2	2	4	4	2	2	3	2	3	2	3	4
2	2	1	2	2	1	2	1	2	2	2	2	2	4	2	3	2	2	2	1
1	3	1	1	3	1	1	2	1	1	3	3	3	2	2	1	3	2	1	3
3	1	1	3	2	2	2	3	1	2	2	2	2	2	1	2	1	2	1	2
1	2	1	1	3	3	2	2	1	2	1	1	1	3	1	2	2	3	1	3
1	3	1	1	3	3	1	2	2	2	3	2	1	4	1	4	4	2	2	2
2	1	2	2	2	1	1	2	1	3	2	2	3	2	3	1	1	2	2	2
2	2	3	2	3	1	2	3	2	3	2	1	3	4	4	1	3	3	1	3
2	3	1	1	4	3	1	1	1	1	2	1	2	3	2	3	3	3	1	3
2	3	1	1	3	3	1	1	2	2	3	3	2	3	1	3	2	3	1	3
2	2	2	1	3	2	2	1	2	2	3	2	2	3	2	3	3	3	2	3
1	2	1	1	3	1	1	1	1	1	1	2	2	2	1	2	1	2	1	2
3	1	1	4	4	1	1	1	1	2	1	2	2	1	2	2	1	1	1	1
2	2	2	2	2	2	2	2	2	2	2	2	2	2	2	2	2	2	2	2
1	2	1	1	3	2	2	1	2	1	3	3	1	3	1	2	3	3	2	3
4	1	1	1	1	1	1	2	2	2	4	3	2	4	1	3	1	1	1	2
2	1	2	2	4	1	1	1	1	1	4	3	1	3	1	2	2	2	1	2
2	3	2	4	3	2	2	3	1	3	2	3	3	3	2	2	2	3	1	3
2	3	4	4	4	4	2	4	3	4	2	2	4	2	4	4	2	2	2	3
2	2	1	1	3	1	1	1	1	2	2	2	3	1	2	1	2	2	1	3
2	4	3	2	4	2	2	3	3	2	1	1	2	1	2	2	2	3	2	2
2	2	1	2	2	2	2	1	2	2	1	1	1	4	1	3	3	4	1	1
1	1	1	1	3	1	1	1	1	2	3	3	1	3	1	2	3	3	1	3
3	3	2	2	3	3	1	4	3	4	2	2	2	2	2	3	3	2	2	2
2	1	1	1	1	2	1	1	1	2	1	3	1	3	1	2	4	2	1	3
3	2	2	3	4	3	1	1	1	3	1	1	2	1	4	2	1	1	1	1
2	2	1	1	3	2	1	2	2	3	2	1	2	3	1	2	2	2	1	2
1	3	1	1	2	2	2	2	2	1	2	2	2	2	1	2	2	2	1	3
2	1	1	3	3	2	1	1	1	1	2	1	2	2	2	2	2	2	1	1
1	1	1	2	4	1	1	1	1	2	3	2	2	2	3	3	2	2	2	3
2	2	1	2	2	1	3	1	1	1	3	2	1	2	1	2	2	3	1	3
1	1	1	1	2	1	2	1	3	2	1	2	1	3	4	3	3	3	1	4
2	2	2	2	2	1	1	3	2	2	2	3	2	2	2	3	2	2	1	3
2	1	1	2	3	3	1	2	1	3	2	3	2	2	4	2	2	2	1	2
2	2	3	2	3	2	3	3	2	3	3	3	3	3	3	3	3	3	2	3
2	2	2	2	2	2	2	2	1	1	1	2	3	3	3	3	2	2	3	3
2	2	2	2	3	2	3	2	2	3	3	2	2	2	1	1	2	2	1	3
2	1	1	3	3	2	1	1	2	3	3	3	2	2	2	3	2	2	2	2
2	2	2	2	3	2	1	2	3	3	2	3	2	2	2	2	1	1	3	2
3	3	3	2	2	2	2	2	2	2	2	2	1	1	1	1	3	3	3	3
2	1	1	2	3	2	1	2	2	3	3	2	2	2	2	2	2	2	2	2
3	2	3	3	3	2	1	1	3	3	3	2	3	2	2	2	2	2	2	2
2	3	3	3	3	4	4	3	3	4	3	3	2	1	2	3	2	2	2	3
1	1	2	2	2	1	1	1	1	4	1	1	1	1	3	2	2	2	2	2
2	1	1	2	2	2	2	3	1	2	2	2	2	2	2	2	2	2	1	2
2	1	1	3	2	1	2	2	1	2	3	3	2	4	1	3	4	3	1	4
1	1	1	2	2	2	1	1	1	1	2	2	2	2	1	1	3	1	3	2
2	3	2	2	3	2	2	1	2	2	1	2	2	2	2	1	3	2	1	2
2	1	1	2	2	4	2	2	2	2	2	2	2	2	2	2	2	2	2	2
2	2	1	3	3	1	1	1	1	1	3	1	1	3	1	3	2	2	1	3
2	2	1	3	1	3	1	1	2	2	3	3	2	3	2	1	2	3	1	4
2	2	2	3	3	1	1	1	1	2	2	1	2	2	1	1	2	1	1	1
1	1	1	2	3	3	1	1	1	2	2	2	1	3	1	2	2	2	1	3
2	4	1	2	2	3	2	1	2	2	3	2	2	2	2	2	4	4	1	1
2	2	1	2	3	1	1	1	1	2	2	3	2	4	1	2	2	2	1	1
3	3	3	2	3	2	2	2	2	2	4	2	1	2	2	2	3	3	3	3
1	1	1	1	1	1	1	1	1	1	3	2	1	3	1	1	4	4	1	4
1	1	1	2	1	2	1	1	1	1	3	2	2	3	3	3	2	3	3	2
2	1	1	2	3	1	1	2	1	2	1	2	2	2	1	1	1	1	2	1
3	2	2	2	2	2	2	2	2	2	2	2	2	2	2	2	2	2	2	2
1	2	1	2	2	1	1	1	1	2	1	1	1	3	1	1	3	3	1	3
1	2	2	2	3	3	1	2	1	3	2	2	3	3	2	2	3	3	1	3
1	2	1	2	2	1	2	1	1	3	1	2	2	3	2	3	3	4	1	2
3	2	2	3	3	2	1	2	4	3	2	1	3	2	3	2	2	2	2	3
3	2	3	2	2	3	2	3	2	2	2	2	3	2	3	2	3	3	2	3
2	2	1	1	1	3	4	1	1	2	3	2	1	2	1	2	3	2	1	2
1	2	1	1	1	1	1	1	1	1	3	2	1	1	1	1	1	2	1	3
1	2	1	1	3	3	4	1	1	2	3	3	1	4	1	1	3	3	1	3
2	1	1	2	3	2	2	2	2	2	2	2	2	2	2	4	4	4	1	3
1	3	1	1	2	2	1	1	2	2	3	3	1	1	1	2	3	3	1	3
1	3	2	3	3	2	2	3	1	3	2	3	3	3	2	2	4	3	1	3
2	1	1	2	3	3	1	4	1	3	2	3	1	4	3	2	2	2	1	3
2	1	2	2	3	2	1	1	1	2	2	3	2	3	1	2	2	2	1	2
2	2	1	2	1	1	1	1	2	2	3	3	1	3	1	2	3	2	1	3
2	2	1	2	4	2	1	1	1	2	2	3	2	2	1	2	4	3	1	3
3	1	3	2	2	1	2	2	2	2	2	2	2	3	2	2	2	2	1	3
2	1	1	1	4	2	1	1	4	3	2	2	3	4	3	3	3	3	1	3
2	3	1	3	3	2	1	1	3	1	4	3	2	1	1	2	2	2	3	3
3	2	1	4	3	4	3	3	3	2	2	2	2	1	3	1	3	4	3	3
2	2	1	1	2	4	2	2	2	2	3	4	2	3	2	2	4	3	1	4
1	2	2	3	3	1	2	3	1	3	2	1	2	2	1	1	2	1	1	3
1	2	1	3	3	2	1	1	1	2	3	3	2	2	1	2	2	1	1	2
2	2	1	2	3	2	1	2	2	3	1	2	3	1	2	2	1	2	2	1
2	2	1	1	4	3	1	4	2	3	2	1	1	4	1	2	4	4	1	4
1	2	1	1	4	1	1	2	1	2	4	1	2	2	1	1	4	4	1	2
1	1	1	2	3	1	1	4	2	3	2	3	2	3	2	1	2	1	1	2
1	1	2	1	1	1	1	1	1	2	1	1	1	4	1	1	3	4	1	3
3	1	2	2	3	2	2	3	2	3	2	3	2	2	2	2	3	3	1	2
1	2	1	1	4	3	1	1	1	1	4	3	1	3	1	3	3	3	1	4
1	3	1	2	4	2	1	1	1	1	3	2	1	3	1	2	2	2	1	3
2	4	1	2	3	3	1	1	1	2	3	4	2	4	1	3	3	3	1	4
3	1	3	3	2	1	2	1	1	3	2	3	3	2	1	2	2	2	2	2
2	1	1	1	3	3	1	1	1	3	2	2	1	4	1	1	3	3	1	4
2	1	1	1	2	2	1	1	3	2	2	3	2	3	1	1	2	3	1	4
3	1	3	2	1	3	2	1	1	3	1	4	3	2	2	1	2	1	1	3
2	3	2	2	2	3	2	2	3	2	2	2	2	2	2	2	2	2	3	2
2	2	2	2	3	2	1	1	2	3	2	3	3	2	2	1	1	2	1	2
3	2	3	1	4	2	3	4	3	3	2	2	4	3	2	4	1	4	4	3
4	1	3	3	3	1	2	1	2	3	1	2	4	2	3	1	1	1	3	1
1	2	2	2	4	3	2	1	1	1	1	1	1	3	2	2	3	3	1	3
1	3	1	1	1	1	2	1	1	1	1	1	1	4	1	2	2	4	1	4
2	1	1	3	3	3	1	1	2	1	3	2	2	2	2	3	1	1	1	3
2	2	1	1	3	2	1	2	1	3	2	2	2	3	1	2	2	2	1	3
3	4	3	4	3	4	2	3	2	2	1	3	2	3	1	3	2	3	2	3
3	1	3	3	3	1	1	1	2	3	1	1	3	2	1	1	2	2	1	2
2	2	1	2	3	2	1	1	2	2	2	2	2	2	1	1	2	2	2	2
1	2	1	1	3	1	2	2	2	2	2	2	2	3	2	2	2	3	2	3
1	2	1	1	4	2	1	1	1	2	3	2	2	3	1	2	3	3	1	3

## Sheet: Anxiety Scale
2	1	1	1	1	2	2	2	3	1	1	1	1	1	1	2	1	1	1	2
4	4	4	4	4	4	4	3	4	4	4	4	4	4	4	4	4	3	4	4
3	2	3	2	2	2	2	1	1	1	1	1	1	1	1	1	1	1	1	1
2	2	2	2	2	2	2	1	2	2	2	2	2	2	2	2	3	2	2	2
3	4	4	3	2	3	4	3	3	3	3	3	3	2	3	3	4	4	3	2
1	1	1	1	1	1	1	1	1	1	1	2	1	1	1	1	1	1	1	1
1	1	1	2	3	2	1	1	1	3	2	2	2	1	1	2	2	1	1	2
1	1	1	1	1	1	1	1	1	1	1	1	1	1	1	1	1	1	1	1
3	3	2	1	3	3	3	2	1	1	3	3	3	4	3	4	4	1	2	2
2	2	1	2	4	1	1	1	1	1	1	1	1	1	4	1	1	1	4	1
1	1	1	1	1	1	1	1	1	1	1	1	1	1	1	1	1	1	1	1
1	1	1	1	1	1	1	1	1	1	1	1	4	1	1	1	1	1	1	2
1	1	1	1	1	1	1	1	1	1	1	1	1	1	1	1	1	1	1	1
1	1	1	1	1	1	1	1	2	1	1	1	4	1	1	2	2	1	3	1
1	1	1	1	1	1	1	1	1	1	1	1	1	1	1	1	1	1	2	1
2	1	2	2	1	1	1	1	2	2	1	1	1	1	1	3	3	1	2	2
2	1	1	1	2	1	1	1	2	1	1	1	3	1	1	2	2	1	2	1
1	1	1	1	1	2	1	1	2	1	1	1	1	1	1	3	2	1	1	1
1	1	1	1	3	1	1	1	2	2	1	1	1	1	1	3	2	1	2	1
2	2	2	2	2	1	1	2	2	1	1	1	1	1	1	1	1	1	1	1
3	1	3	3	2	3	1	2	2	2	1	1	2	2	4	2	2	1	1	2
3	1	1	1	2	1	1	1	1	1	1	1	1	1	1	2	2	1	3	3
1	2	2	3	2	2	1	2	2	2	1	1	1	1	1	1	3	1	4	1
1	1	1	1	4	1	1	1	3	1	1	1	1	1	1	2	1	1	4	1
1	1	2	1	1	1	3	2	2	2	3	2	2	1	2	1	1	1	2	1
2	1	1	1	2	1	1	1	3	1	1	1	1	1	2	1	2	1	3	2
2	2	2	2	2	2	2	2	2	2	2	2	2	2	2	2	2	2	2	2
2	2	2	2	2	2	2	2	2	2	2	2	3	2	2	1	2	2	2	2
2	2	2	2	2	2	2	2	2	2	2	2	2	2	2	3	2	2	2	2
2	2	2	2	2	2	2	2	2	2	2	2	2	2	2	2	2	2	2	2
1	1	1	1	1	1	1	1	1	1	1	1	1	1	1	1	1	1	1	1
1	1	1	1	1	1	1	1	1	1	1	1	1	1	1	1	1	1	1	1
2	2	1	1	2	2	2	4	2	2	4	3	2	2	4	3	1	1	2	2
2	2	2	2	2	2	1	1	4	2	2	1	4	4	3	1	2	4	2	1
3	2	2	2	2	1	1	1	4	2	2	2	4	2	1	3	2	2	2	1
1	1	2	1	1	1	1	2	1	1	1	1	1	1	1	2	2	1	3	2
1	1	2	1	2	1	1	1	2	1	1	1	3	1	2	3	2	2	2	2
2	2	2	1	2	2	2	2	2	2	2	2	2	2	2	2	2	2	2	2
1	1	1	1	1	1	1	1	1	1	1	1	1	1	1	1	1	1	1	1
1	1	1	1	1	1	2	1	1	1	1	1	1	1	1	1	1	1	3	1
2	3	2	2	2	1	3	1	1	1	1	1	4	1	1	4	1	1	3	2
1	1	1	1	4	1	1	1	2	2	1	2	3	1	1	2	3	1	3	1
1	1	1	1	4	1	1	1	4	1	1	1	3	1	1	1	1	1	2	1
1	1	1	1	1	1	1	1	1	1	1	1	1	1	1	3	3	1	3	1
1	1	1	1	1	1	1	1	1	1	1	1	1	1	1	1	1	1	1	2
2	2	2	1	2	2	2	1	2	2	2	2	2	2	2	1	2	1	3	2
2	2	2	2	2	1	2	2	2	1	1	1	2	1	2	1	3	1	3	1
2	1	1	1	1	1	1	1	3	1	1	1	4	1	1	3	1	1	1	1
1	2	1	1	1	1	1	1	1	1	1	1	1	1	1	2	1	1	1	2
1	1	1	1	3	1	1	1	4	1	1	1	1	1	1	1	3	1	2	2
2	1	1	1	3	1	1	1	3	1	1	1	4	1	2	2	3	1	3	1
1	1	1	1	4	1	1	1	4	1	1	1	4	1	1	1	4	1	3	1
1	1	1	1	1	1	1	1	2	1	1	1	1	1	2	1	1	1	1	1
2	2	1	1	1	1	2	1	3	1	1	1	3	1	1	1	1	1	3	1
2	2	2	1	1	2	2	2	1	3	2	1	1	1	1	1	1	1	1	2
3	1	2	2	1	1	1	1	2	2	1	2	3	1	1	2	2	2	2	2
2	2	4	2	2	2	1	1	1	1	1	1	1	1	1	1	1	1	1	1
4	4	4	4	4	4	4	4	4	4	4	4	4	4	4	4	4	4	4	4
1	1	1	1	4	1	1	1	4	4	4	4	4	4	4	1	1	1	1	4
1	1	1	1	1	1	1	1	1	1	1	1	1	1	1	2	2	2	2	2
1	1	1	1	1	1	1	1	1	1	1	1	1	1	1	1	1	1	1	1
2	2	2	2	2	2	2	2	2	2	2	2	2	2	2	2	2	2	2	2
1	4	3	4	3	3	2	3	2	3	3	2	2	3	3	3	1	3	3	2
2	2	3	3	2	4	3	3	2	2	3	2	2	3	4	2	3	2	2	2
3	2	2	1	3	2	2	2	2	2	2	1	1	1	1	2	2	1	2	2
2	2	2	1	2	1	1	2	3	2	2	1	4	1	2	1	2	2	1	2
2	1	1	2	2	2	2	2	3	2	2	1	1	1	1	2	1	2	1	1
2	2	3	3	2	1	2	2	1	3	1	1	2	2	2	2	1	2	1	2
3	2	2	2	2	2	2	2	2	2	2	2	2	2	2	2	1	1	2	1
1	1	1	1	1	1	1	1	1	1	1	1	1	1	1	1	1	1	1	1
1	2	1	1	1	1	1	1	2	1	1	1	1	1	2	1	1	2	1	1
2	2	2	2	2	2	3	3	3	3	2	3	2	2	2	2	2	1	2	2
1	2	1	1	3	3	2	1	1	2	2	1	3	2	1	2	1	1	3	1
1	1	1	1	1	1	1	1	1	1	1	1	1	1	1	1	1	1	1	3
2	2	2	1	1	1	1	1	3	1	1	1	3	1	1	1	2	3	2	1
2	2	2	2	2	2	2	2	2	2	2	2	2	2	2	2	2	2	2	2
1	2	2	2	2	1	1	1	1	1	1	1	1	1	1	1	2	2	2	1
4	2	3	1	2	1	2	1	2	1	2	2	2	1	4	3	1	1	4	2
1	1	1	1	1	1	1	1	1	1	1	1	1	1	1	1	1	1	1	1
2	1	2	1	4	1	1	2	3	1	1	1	1	1	2	1	1	2	2	2
1	1	1	1	4	1	2	1	3	1	1	1	4	1	1	1	3	3	2	1
1	1	1	1	3	1	3	2	3	2	2	1	2	2	1	2	1	3	2	2
2	2	2	2	2	2	2	2	2	2	2	1	1	1	1	2	2	2	1	1
1	1	1	1	4	1	1	1	4	1	1	1	4	1	1	1	1	1	4	1
1	1	1	1	1	1	1	1	1	1	1	1	1	1	1	1	1	1	1	1
2	2	2	2	2	2	2	2	2	2	2	2	2	2	2	2	2	2	2	2
3	3	3	1	1	1	2	2	2	2	1	1	1	1	3	2	2	2	3	1
2	2	2	2	2	2	2	2	2	2	2	2	2	2	2	2	2	2	2	2
1	1	1	1	3	1	1	2	2	1	1	1	4	1	1	1	3	1	3	1
2	1	1	3	2	1	1	1	2	1	1	1	4	1	1	1	3	1	2	1
2	1	1	2	3	1	1	2	2	1	1	2	4	1	1	4	3	2	4	2
1	1	1	2	4	2	2	1	3	1	1	1	4	1	1	1	4	2	3	1
1	1	1	1	1	1	1	1	1	1	1	1	1	1	2	1	1	1	1	1
1	1	2	1	1	1	2	2	2	1	1	1	4	1	2	1	2	1	3	1
2	2	3	4	1	2	3	4	3	2	4	2	2	2	2	2	1	1	1	1
1	1	1	1	1	1	2	1	1	1	1	1	1	1	1	1	3	2	3	2
3	3	3	3	3	2	2	2	3	3	3	4	2	3	2	1	1	1	2	2
3	4	3	3	2	2	1	3	3	3	3	3	3	2	2	1	1	3	3	3
2	1	1	1	3	1	1	1	3	1	1	1	2	1	1	1	2	1	2	2
3	2	2	2	3	2	2	2	2	2	3	1	1	1	3	2	2	1	2	1
2	2	2	2	2	2	2	2	2	2	2	2	2	2	2	2	2	2	2	2
2	2	2	2	2	2	2	2	2	2	2	2	2	2	2	2	2	2	2	2
1	1	1	1	1	1	1	1	1	1	1	1	1	1	1	1	1	1	1	1
1	1	1	1	1	1	1	2	2	2	2	1	3	1	1	1	2	1	3	1
1	1	1	1	3	1	1	1	3	1	1	1	1	1	1	1	3	1	2	1
3	1	1	1	3	1	1	1	1	1	1	1	3	1	2	1	3	2	3	1
2	2	1	1	2	2	2	1	2	1	3	1	2	3	2	1	3	1	2	2
2	1	1	1	3	1	2	1	3	1	1	1	1	1	1	1	3	2	3	2
2	2	2	3	1	1	1	1	3	1	3	2	1	1	2	2	1	1	1	1
2	2	4	2	3	1	2	2	3	2	2	2	3	3	2	2	3	1	2	3
2	2	2	2	2	1	1	2	2	2	1	1	4	1	1	1	1	1	1	1
2	1	1	1	4	1	2	2	3	1	3	1	4	2	2	2	3	1	3	1
3	3	2	2	2	2	2	3	2	2	1	1	4	2	1	3	3	1	2	2
2	2	2	3	2	1	1	1	2	2	1	2	2	1	1	1	4	2	3	2
3	4	4	4	3	3	4	2	2	4	2	3	2	2	3	3	2	3	3	2
3	2	3	3	3	2	3	3	3	2	2	3	3	2	3	2	2	2	2	2
2	2	4	4	3	1	1	4	4	3	2	1	2	3	2	1	2	2	4	1
3	3	3	3	1	2	4	4	3	2	4	4	1	2	3	2	1	2	1	4
3	2	2	2	2	1	1	2	1	1	2	1	4	1	3	3	3	4	2	2
3	2	2	2	2	2	4	4	2	4	2	2	2	2	2	3	2	3	1	3
2	2	2	1	1	1	2	2	2	1	1	1	4	1	1	1	4	1	2	2
2	2	2	4	2	1	3	3	3	2	2	2	2	3	3	3	2	1	1	2
1	1	1	1	4	1	2	1	4	1	1	1	1	1	1	1	1	2	4	1
1	1	2	1	4	1	2	2	4	1	2	1	4	1	1	1	4	1	3	1
2	1	1	1	2	1	1	2	1	2	1	1	3	1	1	2	3	1	2	3
1	1	1	3	1	1	1	1	3	1	1	1	1	1	1	1	4	2	2	3
3	2	1	4	1	2	1	2	2	3	1	1	1	1	1	2	3	2	4	1
1	1	2	2	2	1	1	3	2	1	1	2	1	1	1	3	2	2	2	1
1	1	1	1	3	1	3	2	3	2	1	1	3	1	2	2	2	1	2	2
1	1	1	1	3	1	1	1	3	1	1	1	3	1	1	1	2	1	3	2
2	1	2	1	3	1	1	1	2	1	2	1	4	1	1	2	4	2	2	2
2	1	3	1	1	1	1	1	2	2	1	1	1	1	1	2	3	1	1	2
2	1	2	1	3	2	1	1	3	2	1	1	3	1	2	2	2	1	2	3
2	1	1	1	3	1	1	1	3	1	1	1	1	1	1	1	3	2	3	1
2	1	1	2	2	1	1	1	3	1	1	1	1	1	1	1	1	1	2	1
3	2	2	2	2	1	1	2	1	2	1	1	3	1	1	2	2	3	2	2
1	1	1	1	1	1	1	1	1	1	1	1	1	1	1	1	3	1	3	2
2	1	2	2	3	1	2	2	3	1	1	1	3	1	1	3	2	2	2	1
2	2	2	2	2	1	1	1	1	1	1	2	4	2	4	4	3	2	2	2
3	2	2	2	4	1	1	2	1	1	1	1	4	1	1	2	4	2	3	1
3	1	1	2	3	1	1	2	2	1	1	1	4	1	1	2	3	1	3	2
2	1	1	2	2	1	1	2	2	1	1	1	4	1	1	2	4	1	4	2
2	1	2	2	3	1	2	2	2	2	1	2	4	1	1	2	1	3	2	1
2	1	1	1	3	1	1	1	2	1	1	1	4	1	1	2	1	1	4	1
1	1	1	4	3	1	2	1	3	1	1	2	4	1	3	2	3	1	2	2
1	1	1	1	1	1	3	1	3	1	1	1	4	1	3	2	4	1	2	1
1	1	1	1	1	1	2	3	2	1	2	1	4	1	2	2	2	1	2	2
1	1	1	1	2	1	1	2	2	1	1	1	3	1	1	3	3	1	2	1
4	1	1	3	3	3	4	4	2	2	3	4	2	1	3	2	3	2	1	2
2	3	2	2	3	3	3	2	3	3	3	2	4	3	3	2	3	2	3	1
2	1	2	1	3	1	2	2	2	2	2	1	4	1	1	1	2	2	2	1
2	1	2	2	1	1	2	3	3	1	1	1	4	1	1	2	4	1	4	1
1	1	1	1	1	1	1	1	1	1	1	1	1	1	1	2	1	1	1	1
2	2	2	2	2	2	2	2	2	2	2	2	2	2	2	2	2	2	2	2
2	2	2	2	2	2	2	2	2	2	2	2	2	2	2	2	2	2	2	3
1	1	2	2	1	1	1	2	1	1	1	1	1	1	1	1	1	1	2	1
2	2	2	2	2	2	2	2	2	2	2	2	2	2	2	2	2	2	2	2
2	2	2	2	2	2	2	2	2	2	2	2	2	2	2	3	2	2	2	2
3	2	2	2	2	3	3	2	2	3	2	2	2	2	1	2	2	4	3	4
1	1	1	4	4	1	1	1	4	1	1	1	4	1	1	1	1	1	4	1
1	4	1	3	2	2	3	2	1	2	3	2	3	3	3	3	2	2	2	3
4	3	2	2	2	1	3	3	3	4	3	4	2	2	3	3	3	2	2	3
2	3	2	1	3	4	3	2	2	4	2	3	2	1	2	1	3	1	1	1
2	1	1	1	1	1	2	1	1	1	1	1	1	1	3	2	1	1	1	1
2	2	2	2	2	1	2	2	2	2	2	1	1	1	2	2	3	1	3	2
3	2	2	1	3	1	1	2	2	3	1	1	4	1	1	3	1	3	4	1
2	2	2	2	2	1	1	2	2	2	1	2	3	1	1	3	2	2	3	1
3	2	2	2	2	2	1	2	1	2	2	2	3	1	2	2	3	2	3	1
1	1	1	1	1	1	1	1	1	1	1	1	3	1	1	1	2	1	3	1
1	1	2	1	3	2	1	1	3	2	1	1	2	1	1	1	1	2	3	1
2	2	1	1	1	1	2	1	1	2	1	1	1	2	2	1	1	1	1	2
2	2	2	4	1	1	1	3	2	1	1	1	4	1	1	1	1	2	1	2
2	2	2	2	2	2	2	2	3	1	2	1	1	2	2	3	2	2	3	2
3	2	2	3	1	2	3	3	1	1	1	1	4	1	1	2	3	3	2	3
2	2	2	1	1	1	1	1	3	2	2	1	1	1	2	3	2	1	3	1
1	1	1	1	4	1	1	2	4	1	1	1	4	1	1	3	3	1	2	1
1	1	1	1	1	1	1	1	1	1	1	1	1	1	1	2	1	1	2	1
1	1	1	1	4	1	2	1	4	1	1	2	4	1	1	3	2	1	4	1
2	2	2	2	2	1	3	2	3	1	2	3	4	1	2	3	1	2	1	1
2	1	1	1	4	1	2	1	3	1	2	1	4	1	1	1	1	1	4	1
1	1	1	2	3	1	1	1	3	1	1	1	1	1	1	3	2	1	3	1
1	1	1	1	3	1	1	1	4	1	1	1	4	1	1	1	4	1	4	1
3	1	2	2	2	1	2	1	3	2	2	1	4	1	2	2	4	1	3	2
2	1	1	2	4	1	1	1	2	1	1	1	4	1	1	3	4	2	4	2
1	1	1	1	3	1	1	1	3	1	1	1	3	1	1	2	3	1	3	1
1	1	2	1	1	1	1	2	3	1	1	1	4	1	1	2	4	1	4	1
2	1	1	1	3	1	1	1	3	1	1	1	4	1	1	2	1	2	2	1
3	2	2	4	1	1	2	3	3	2	3	2	4	1	1	2	2	2	2	1
2	2	2	2	2	2	1	2	3	1	2	2	3	1	1	2	2	1	3	2
2	1	2	1	3	1	1	1	3	1	1	1	4	1	1	1	4	2	4	1
1	1	1	1	4	1	1	1	4	1	1	1	4	1	1	1	1	1	4	1
3	1	1	1	4	1	1	1	3	1	1	1	4	1	1	1	4	2	4	1
1	1	1	1	3	1	1	1	1	1	1	2	4	1	1	2	1	1	1	1
1	1	1	1	4	1	1	2	2	2	1	1	1	1	1	2	2	1	4	1
1	1	1	1	3	1	3	1	3	1	1	1	4	1	1	3	2	1	2	1
3	2	3	3	2	1	4	4	3	2	3	3	2	1	3	1	4	2	3	1
1	1	1	1	3	1	3	1	1	1	1	1	4	1	1	1	1	2	2	2
2	1	2	1	2	1	1	1	4	1	1	1	1	1	1	2	3	1	3	1
2	2	2	2	4	1	1	2	2	1	1	1	1	1	3	3	4	2	3	1
2	3	2	1	3	1	2	2	2	2	2	2	2	2	2	2	2	1	2	2
2	2	2	2	2	2	2	2	2	2	2	2	2	2	2	2	2	2	2	2
2	1	1	1	1	1	1	1	1	1	2	1	1	1	1	1	1	1	1	1
3	2	1	1	3	1	1	1	1	1	1	1	1	1	1	1	1	2	1	1
1	1	1	1	4	1	1	1	2	1	1	1	4	1	2	1	3	2	4	1
1	1	1	1	4	1	1	1	4	1	1	1	4	1	1	1	4	1	1	1
1	2	1	1	4	1	1	1	1	1	1	1	4	1	1	1	4	1	4	1
3	1	1	2	4	1	1	1	1	1	1	1	1	1	1	1	3	1	1	1
2	1	1	1	3	1	1	1	2	1	1	1	3	1	1	1	3	2	3	1
1	1	1	1	4	1	1	1	3	1	1	1	4	1	1	1	3	1	4	1
2	2	2	1	1	1	1	3	2	1	1	1	2	1	3	3	2	1	3	2
1	1	1	1	3	2	1	1	3	1	1	1	3	1	1	1	2	1	3	1
1	1	1	1	1	2	1	1	3	1	1	1	3	1	1	1	2	2	3	2
2	2	2	2	2	1	1	2	3	1	1	1	4	1	3	3	3	1	2	3
1	1	1	1	3	1	1	2	4	2	1	1	4	1	1	2	3	2	4	1
1	1	1	1	1	1	1	1	1	1	1	1	1	1	1	1	1	1	4	1
2	1	1	1	1	1	1	2	2	2	1	1	4	1	2	2	3	2	3	2
1	1	1	1	3	3	2	1	2	1	2	2	1	2	1	1	2	2	2	1
1	1	1	1	2	1	1	1	3	1	1	1	3	1	1	2	2	2	3	1
1	1	1	1	3	1	1	2	3	1	1	1	1	1	1	1	1	2	2	1
1	1	1	1	1	1	1	2	2	1	2	1	1	1	1	1	3	1	3	2
2	1	1	1	1	1	1	1	3	2	2	2	1	1	1	1	2	1	3	1
2	2	3	2	3	1	2	2	3	1	3	2	4	1	2	1	3	1	3	2
1	1	1	1	3	2	1	1	3	1	1	1	1	1	3	1	3	1	3	1
2	1	1	1	4	1	1	1	3	1	1	1	3	1	1	2	4	2	4	2
2	2	2	2	3	1	1	3	2	3	1	1	1	1	1	2	1	2	3	1
1	1	1	1	4	1	1	1	2	1	1	1	1	1	1	2	3	2	3	1
2	1	1	1	1	1	1	1	2	2	1	2	3	1	2	3	3	1	3	2
2	2	3	2	1	1	1	1	3	1	1	1	1	1	1	1	3	1	2	1
2	2	2	3	1	2	4	4	2	2	2	2	2	1	3	3	1	1	1	2
1	1	1	1	1	1	1	1	1	1	1	1	1	1	1	1	1	1	1	1
2	2	2	2	3	1	1	1	2	1	1	1	3	1	1	1	1	1	3	1
1	1	1	1	4	1	1	2	4	1	1	1	4	1	1	2	4	1	4	1
2	2	2	2	2	2	1	1	1	2	2	2	2	2	1	1	1	2	1	1
1	1	1	1	1	1	1	1	1	1	1	1	1	1	1	1	1	1	3	1
2	1	1	1	4	1	1	1	3	1	1	1	4	1	1	1	3	1	4	1
2	2	2	2	2	2	3	3	2	2	3	1	1	1	2	1	2	2	3	2
2	3	2	3	2	2	3	2	2	1	3	3	1	4	3	4	3	2	4	3
1	2	2	1	4	1	1	2	4	1	1	1	3	2	3	2	1	1	2	2
2	1	1	1	2	2	1	3	2	1	2	1	3	1	1	1	3	2	3	1
2	1	2	1	3	1	1	2	3	1	1	1	3	1	2	2	3	2	2	2
1	2	2	1	4	1	1	1	4	2	1	1	4	1	1	2	4	1	3	1
1	1	1	1	3	1	2	1	3	1	1	1	3	1	1	1	3	1	3	1
3	2	3	3	3	2	1	3	4	1	4	2	2	2	3	2	4	1	2	1
1	1	1	1	1	1	1	1	1	1	1	1	1	1	1	1	1	1	1	1
1	2	1	2	1	2	1	2	1	1	1	2	2	2	2	2	2	2	2	2
1	1	1	1	1	1	1	1	1	1	1	1	1	1	1	1	1	1	1	1
3	2	3	1	1	1	1	1	3	1	1	1	1	1	1	1	1	1	3	2
4	1	1	1	1	1	1	1	3	1	1	1	4	1	1	1	1	1	4	2
1	1	1	1	1	1	1	1	1	1	1	1	1	1	1	1	1	1	1	1
1	1	2	1	1	1	3	2	2	1	2	2	1	2	2	2	1	2	1	1
2	1	2	1	2	2	1	3	2	2	1	1	2	1	4	2	1	1	2	1
2	2	2	2	2	1	1	1	3	1	1	2	3	1	2	2	1	1	3	2
2	2	2	2	2	2	2	2	3	2	2	2	2	2	2	2	3	2	2	2
3	3	3	3	2	2	2	3	3	3	3	3	3	3	3	3	3	2	3	2
2	1	1	1	3	1	2	2	4	4	4	3	3	3	3	1	1	1	1	1
1	1	1	1	1	1	1	1	3	1	1	1	1	1	1	1	2	1	4	1
2	1	1	1	3	1	1	2	2	2	1	1	2	2	1	2	1	3	1	1
2	2	2	1	2	1	2	2	2	1	2	3	3	1	1	2	1	2	2	2
1	1	1	1	1	2	1	1	1	1	1	1	1	1	1	2	1	1	1	1
1	1	1	1	1	1	1	1	4	1	1	3	4	2	1	4	4	1	4	1
1	1	1	1	1	1	1	1	2	1	1	1	3	1	1	3	3	2	3	2
1	1	1	1	1	1	1	1	2	1	1	1	3	1	1	3	2	1	2	1
1	1	1	1	3	1	1	1	2	1	1	1	3	1	2	3	3	1	3	1
2	1	2	1	1	1	1	1	2	1	1	1	2	1	1	2	3	2	1	2
2	2	2	2	3	1	1	2	3	1	1	1	3	1	1	1	3	1	2	1
2	4	2	2	2	2	2	2	1	2	1	1	2	2	4	1	1	1	2	2
2	1	1	1	2	1	1	1	1	1	1	1	1	1	1	1	1	2	2	3
2	3	3	1	3	1	1	1	2	3	2	3	2	3	3	3	2	2	2	3
3	3	3	2	2	3	3	3	3	3	2	3	3	2	3	3	3	3	3	3
1	1	1	1	3	1	2	1	3	2	1	1	4	1	2	2	3	2	3	1
1	1	1	1	4	1	1	2	4	1	1	1	4	1	1	1	4	2	3	1
2	1	2	1	3	1	1	1	4	1	1	1	4	1	2	1	4	2	3	2
3	2	3	2	3	1	1	3	2	1	1	1	3	1	2	1	2	3	2	3
1	1	1	2	2	1	2	2	2	1	2	1	1	2	2	1	1	1	2	2
1	1	1	1	2	1	1	1	2	1	1	1	3	1	1	1	1	1	3	1
2	1	1	1	1	1	1	1	1	1	1	2	4	1	2	2	3	1	4	2
1	1	1	1	3	2	1	1	4	2	1	1	4	1	1	2	3	1	3	1
3	1	2	2	3	1	1	2	2	2	2	1	3	1	1	1	3	2	1	2
2	1	1	1	3	1	1	1	3	1	1	1	1	1	1	1	1	1	3	1
3	1	2	2	2	2	2	2	3	1	1	1	4	1	1	1	3	2	3	1
1	1	1	1	3	1	3	2	1	2	2	1	3	2	1	2	2	3	1	1
1	1	1	1	1	1	1	1	4	1	1	1	1	1	1	1	2	1	4	2
1	1	1	1	1	1	1	2	1	1	1	1	1	1	1	1	1	1	1	2
1	1	1	1	2	1	1	1	2	1	1	1	3	1	1	1	3	2	2	2
2	1	2	2	3	1	1	2	2	1	1	1	1	1	1	3	3	2	2	2
2	2	2	1	3	1	2	1	3	2	1	1	4	1	1	2	4	1	2	1
3	1	2	2	1	1	2	2	1	2	2	1	3	1	1	2	3	1	3	1
2	2	2	2	2	1	1	2	3	1	2	2	3	2	1	1	3	1	2	1
3	1	1	2	3	1	2	2	1	1	1	1	4	1	1	1	1	1	3	1
2	1	1	1	3	1	2	2	3	1	2	1	4	1	1	1	2	1	2	1
2	1	2	1	3	1	1	1	3	2	1	1	3	1	1	1	3	2	3	1
2	1	1	1	4	1	4	3	4	1	3	2	4	2	1	2	4	1	2	2
4	4	4	4	4	4	4	4	4	4	4	4	4	4	4	4	4	4	4	4
3	2	2	2	1	2	1	2	1	2	1	3	3	3	2	3	2	2	2	3
2	2	2	2	2	3	3	3	2	2	3	3	2	3	2	3	2	4	2	2
2	2	2	2	2	2	2	2	2	2	2	2	2	2	2	2	2	2	2	2
4	1	4	1	1	1	1	1	1	1	1	1	4	1	1	1	4	2	4	1
2	1	1	2	2	1	1	1	3	1	1	1	2	1	1	1	2	2	4	1
1	1	1	1	3	1	1	1	2	1	1	1	4	1	1	1	4	1	2	1
2	1	1	1	4	1	2	1	3	1	1	1	4	1	1	2	4	2	3	2
1	1	1	1	1	1	1	1	1	2	1	1	1	1	1	1	1	2	2	2
2	2	2	1	1	1	1	1	2	1	1	1	4	1	1	1	4	1	4	2
1	1	1	2	2	1	2	1	3	2	1	1	4	1	2	2	1	2	4	3
2	1	2	2	3	1	2	2	4	2	1	1	4	1	2	1	3	1	2	1
2	1	2	1	4	1	1	3	3	2	2	1	4	1	2	1	4	2	4	1
2	1	1	1	4	1	1	1	2	2	1	1	4	1	1	1	4	2	4	1
2	1	1	2	1	1	1	1	4	1	1	1	4	2	1	1	4	2	1	1
1	1	1	1	3	1	1	1	3	1	1	1	4	1	1	1	2	2	4	1
2	4	4	4	4	4	1	3	2	2	2	3	2	1	1	3	3	3	2	3
1	1	1	1	3	1	1	1	3	1	1	1	3	1	1	1	3	1	3	1
3	3	3	2	1	1	2	3	2	3	1	1	3	1	2	3	2	1	1	2
2	1	2	2	4	1	2	2	2	2	2	2	4	1	1	1	3	1	3	1
1	1	1	1	4	1	1	1	4	1	1	1	4	1	1	1	4	1	4	1
1	1	1	1	3	1	1	1	2	1	1	1	3	1	1	1	3	1	3	1
2	1	2	1	4	1	1	2	3	1	1	1	4	1	1	2	3	2	2	1
4	1	2	4	2	2	3	1	1	1	2	2	1	4	1	2	2	4	1	4
3	1	1	1	4	2	1	3	2	1	1	1	1	1	2	2	4	2	3	1
1	1	1	1	3	1	1	1	3	1	1	1	3	1	1	1	3	1	3	1
2	2	1	1	3	2	1	1	2	1	1	1	3	1	2	2	3	2	3	2
2	1	1	1	3	1	1	1	2	1	1	1	4	1	1	2	3	2	3	2
1	1	1	1	1	1	1	1	1	1	1	1	1	1	2	1	1	1	1	1
2	2	2	2	2	2	2	2	2	2	2	2	2	2	2	2	2	2	2	2
3	2	2	3	1	2	3	2	3	2	2	3	4	3	2	3	3	2	3	3
2	2	2	2	2	2	2	2	2	2	2	2	2	2	2	2	2	2	2	2
3	2	3	3	2	2	3	2	4	2	3	3	4	3	3	2	2	1	2	3
1	1	1	1	1	2	3	2	2	3	3	3	3	3	3	3	2	1	2	2
2	2	2	1	2	2	2	2	2	3	2	2	2	2	2	2	2	2	2	2
3	2	1	1	2	1	1	2	3	1	1	1	3	1	1	2	2	2	2	1
3	2	2	2	2	1	2	2	2	2	2	1	3	2	2	2	3	2	2	1
2	2	3	4	4	1	2	1	1	2	3	2	1	1	1	1	1	1	4	2
1	1	1	2	3	1	1	2	3	1	1	1	1	1	1	1	2	2	2	2
2	2	1	2	1	1	2	1	3	1	1	1	4	2	1	1	4	1	4	1
4	2	4	3	1	2	2	3	2	1	1	1	3	2	4	3	4	4	3	1
1	1	1	1	1	1	1	1	1	1	1	1	1	1	2	2	1	1	2	1
2	2	2	1	4	1	3	1	3	1	1	1	1	1	1	1	3	1	4	1
2	2	2	1	3	1	1	2	3	2	1	1	3	1	1	3	3	3	2	1
2	2	2	2	2	2	2	2	2	2	2	2	2	2	2	2	2	3	2	2
1	1	1	2	2	1	2	2	2	2	2	2	2	2	2	2	3	3	2	1
3	2	2	1	3	1	1	2	3	1	1	1	1	1	2	2	3	1	4	1
2	2	3	3	3	1	2	1	4	1	1	2	4	2	2	1	3	2	3	1
1	1	1	1	2	1	1	1	2	1	1	1	1	1	1	1	1	1	2	1
1	1	1	1	1	1	2	2	2	2	2	1	1	1	3	2	2	2	4	2
2	2	2	2	2	1	2	2	2	1	1	2	3	2	2	3	3	1	2	1
2	1	1	2	2	1	1	2	4	1	1	1	3	1	2	3	2	1	1	2
4	1	1	1	3	1	1	2	2	1	1	1	4	1	1	1	1	2	2	2
1	1	2	4	2	1	1	1	4	1	1	2	4	1	1	1	2	1	2	1
3	3	2	4	2	2	1	4	2	2	2	1	2	1	1	1	3	2	1	2
3	1	2	2	2	1	3	2	3	1	2	1	1	1	1	2	1	2	1	2
1	1	1	1	2	1	1	1	3	1	1	1	4	1	1	2	2	1	2	1
3	2	2	1	1	1	1	2	1	1	2	1	4	1	1	2	2	2	2	1
3	2	2	2	3	1	2	3	3	1	1	2	3	1	2	2	2	2	2	3
2	2	2	2	2	2	2	2	2	2	2	2	2	2	2	2	2	2	2	2
2	3	2	1	2	1	2	1	2	2	2	2	3	1	1	2	2	2	3	2
2	1	1	1	2	1	1	2	3	1	1	1	2	1	1	2	3	2	2	1
1	1	1	1	1	1	1	1	2	1	1	1	3	1	1	2	1	1	2	1
2	1	2	1	3	1	1	2	2	3	1	1	3	1	1	2	2	2	3	1
3	1	1	1	2	1	1	1	1	2	1	1	1	1	1	1	3	2	4	1
3	1	1	1	2	1	1	2	4	1	1	1	2	1	1	1	1	1	4	1
2	2	1	1	3	1	2	2	3	1	1	1	3	1	1	2	3	2	2	1
2	2	1	2	2	1	2	2	2	2	2	2	3	1	2	2	2	2	3	1
3	2	3	2	2	3	3	2	2	2	2	2	3	3	2	2	3	2	2	2
1	1	1	1	1	1	1	1	1	1	1	1	1	1	1	1	1	1	1	1
4	1	1	1	3	4	2	2	2	2	1	2	2	3	2	2	4	3	3	4
2	2	2	2	2	2	3	2	2	2	3	2	2	2	2	2	3	2	2	2
1	1	1	1	1	1	1	1	1	1	1	1	1	1	1	1	1	1	1	1
3	3	4	3	2	2	3	4	3	1	2	2	2	2	4	2	2	1	1	2
2	1	2	2	2	2	1	1	1	1	1	1	1	1	1	1	1	1	1	1
2	2	2	2	2	2	2	2	2	2	2	2	2	2	2	2	2	2	2	2
2	1	1	1	2	1	1	1	1	1	1	1	4	1	2	2	2	1	4	1
1	1	1	1	4	1	1	1	1	1	1	1	1	1	1	1	1	1	1	1
2	2	2	2	2	1	1	2	1	1	1	2	3	1	1	3	3	2	3	1
1	1	1	1	3	1	1	1	3	1	1	1	3	1	1	1	3	1	3	1
2	2	2	2	2	2	2	2	2	1	1	1	4	4	4	4	2	1	4	2
1	1	1	1	4	1	1	1	4	1	1	1	1	1	1	1	4	1	4	1
3	2	1	1	4	2	2	2	3	2	1	1	1	1	1	1	1	1	1	1
1	1	1	1	1	1	2	2	2	2	2	1	1	1	1	2	2	1	4	1
1	1	1	1	1	1	1	1	1	1	1	1	2	1	1	1	2	1	1	1
2	2	2	2	3	1	3	2	3	2	2	1	3	1	2	4	3	2	3	2
2	1	1	1	3	1	1	1	3	1	1	1	4	1	2	1	3	1	3	1
1	1	1	1	3	1	1	1	3	1	1	1	3	1	2	2	3	2	4	1
1	1	1	1	2	1	1	1	2	2	2	1	3	1	2	2	2	1	2	2
2	2	2	2	2	2	2	2	2	2	2	2	2	1	1	2	2	2	2	2
1	1	1	1	4	1	1	1	2	1	1	1	4	1	1	3	4	1	4	1
3	2	2	2	2	2	3	3	2	2	2	2	2	1	2	3	2	2	2	2
2	2	2	2	2	2	2	2	2	2	2	1	3	1	1	3	2	2	3	1
1	1	1	1	3	1	1	1	3	1	1	1	3	1	1	2	3	1	3	2
2	1	1	1	3	1	2	1	4	1	1	1	4	1	2	1	4	2	4	2
1	1	1	1	3	1	1	1	2	1	1	1	4	1	1	4	1	1	2	1
2	1	1	1	2	1	1	2	3	1	1	1	3	1	2	2	2	2	3	1
3	1	1	1	4	1	2	1	3	1	1	1	1	1	3	4	2	1	2	2
2	1	2	2	2	1	1	2	1	1	1	1	3	1	1	3	4	1	3	2
2	2	2	1	3	2	2	2	2	2	2	2	4	2	2	3	3	2	1	2
1	2	2	1	4	1	1	3	2	1	1	1	3	1	1	1	3	1	1	2
1	1	1	1	1	1	1	1	1	1	1	1	1	1	1	1	1	1	1	1
1	1	1	1	4	1	1	1	2	1	1	1	4	1	1	1	2	1	4	1
1	1	1	1	4	1	3	1	3	1	1	1	4	1	1	2	2	1	3	2
1	1	1	1	4	1	1	1	4	1	1	1	4	1	1	1	4	1	2	2
2	1	2	2	2	2	2	2	2	2	3	3	3	2	2	3	2	1	1	1
1	1	1	1	2	1	1	1	3	1	1	2	3	2	1	4	3	2	3	1
2	1	1	1	1	1	1	1	1	1	1	1	3	1	1	4	1	1	2	1
3	1	2	1	2	3	2	1	1	2	1	1	3	1	1	2	3	1	3	1
2	1	4	2	4	2	4	4	3	2	3	2	2	2	3	2	2	4	2	2
1	1	1	3	3	1	3	4	3	2	1	1	3	2	2	3	2	1	4	2
4	3	4	4	1	3	4	2	3	3	3	2	2	2	2	2	2	2	2	2
1	1	1	2	2	1	2	2	3	1	1	1	3	1	2	1	2	1	3	1
1	2	1	2	2	2	2	2	3	2	2	2	2	2	2	2	2	2	2	2
2	1	2	1	2	1	1	1	2	2	1	1	4	1	1	2	2	2	4	2
2	2	2	1	4	1	1	3	2	1	1	1	4	1	2	2	3	2	4	1
2	2	2	2	3	2	1	2	2	2	1	1	1	2	1	2	2	2	2	2
1	1	1	1	3	2	2	1	2	2	1	1	4	1	1	1	2	1	2	1
1	1	1	1	1	1	1	1	4	1	1	1	4	1	1	1	4	4	4	1
2	3	2	2	2	2	2	2	2	2	2	2	2	2	2	2	2	2	2	2
1	1	1	1	3	1	2	2	3	1	2	1	4	1	1	1	3	1	3	1
4	1	2	1	2	1	1	3	1	2	2	1	4	1	1	1	3	1	2	3
3	1	1	1	1	1	1	1	3	1	1	1	3	1	1	3	3	3	4	2
3	1	1	1	1	1	1	2	4	1	1	1	4	1	2	2	3	1	3	1
3	3	2	3	3	3	3	3	3	3	3	3	3	3	3	3	4	4	4	3
3	3	3	3	3	3	2	3	1	1	1	1	1	1	3	2	1	1	2	1
3	3	4	2	2	4	3	3	3	3	3	3	1	2	3	3	2	4	1	2
3	2	2	2	1	1	1	2	2	2	1	1	1	1	2	1	1	1	2	1
2	2	2	1	4	1	1	2	3	1	2	1	4	1	1	3	3	1	3	1
1	1	1	1	4	1	1	1	4	1	1	1	4	1	1	1	4	1	4	1
3	2	2	2	2	1	2	2	2	1	1	1	3	1	2	3	3	1	3	2
1	1	1	1	1	1	2	2	2	2	2	2	1	1	4	1	1	1	2	2
2	1	1	1	3	1	1	1	3	1	1	1	4	1	1	1	3	2	3	1
4	2	3	3	3	2	1	3	2	2	1	1	2	1	3	1	2	2	2	2
2	1	1	1	3	1	1	2	3	1	1	1	1	1	1	2	3	1	3	2
3	2	2	1	3	3	2	1	3	2	2	1	4	1	1	4	3	2	3	1
3	3	3	3	3	4	2	2	4	2	1	2	4	3	3	1	4	4	1	3
3	1	1	1	4	1	1	1	2	1	1	1	4	1	1	1	3	3	3	1
1	1	2	2	3	3	1	3	2	3	1	3	3	1	3	1	3	2	4	3
1	1	1	1	2	1	1	1	2	1	1	1	4	1	1	2	2	1	3	1
2	2	1	1	3	1	1	1	3	1	1	1	3	1	1	1	2	1	4	2
3	2	2	4	2	1	2	2	3	2	2	2	4	2	1	3	1	1	3	2
2	2	1	1	3	2	1	1	4	1	2	1	4	1	1	1	3	2	3	1
3	2	3	2	2	1	2	4	3	2	2	1	3	2	4	2	2	2	3	2
1	1	1	1	3	1	1	2	3	1	1	1	1	1	3	1	1	1	2	1
2	2	2	2	2	2	3	3	2	2	2	2	3	2	2	4	2	2	1	3
2	2	1	2	2	1	1	1	3	1	1	1	3	1	1	1	3	1	4	1
1	1	1	1	3	2	3	1	1	3	2	1	1	1	1	2	2	1	1	2
1	1	1	1	1	1	1	1	1	1	1	1	3	1	1	2	1	1	2	1
1	1	1	1	1	1	1	1	1	1	1	1	1	1	1	1	1	1	3	1
1	1	2	2	3	1	2	2	2	1	2	1	3	1	2	1	1	1	2	2
1	1	1	1	4	1	1	2	3	1	1	1	1	1	1	1	4	1	4	2
2	1	2	2	4	1	1	1	1	1	1	1	4	2	3	2	1	2	3	1
2	1	2	2	3	1	2	2	2	2	2	1	3	1	2	3	3	2	2	2
3	1	1	3	2	2	3	2	3	2	2	2	3	2	3	2	3	3	2	3
4	1	2	2	1	1	1	2	1	1	2	2	4	1	1	2	4	1	3	1
3	1	3	1	3	1	1	1	3	1	1	1	4	1	1	2	3	1	4	2
2	1	2	2	2	1	3	2	1	1	2	1	1	2	2	2	1	3	1	2
2	2	3	3	2	2	1	2	3	1	2	2	4	1	1	4	3	4	3	2
2	2	2	1	3	1	2	2	3	1	2	1	1	1	1	2	3	2	3	1
3	1	1	1	3	1	1	2	2	1	1	1	3	1	2	2	1	1	3	2
1	1	1	2	1	1	1	2	2	1	1	1	2	1	2	2	1	1	2	1
2	2	2	2	2	2	2	2	2	2	2	2	2	2	2	2	1	2	3	2
3	3	3	3	2	1	3	2	1	1	1	2	3	2	2	2	3	1	2	2
2	1	1	1	3	1	1	1	2	2	1	1	3	1	1	2	3	1	4	1
1	1	1	2	2	1	1	3	1	1	1	1	1	1	3	2	1	1	3	2
4	4	4	4	4	4	4	4	3	4	3	4	3	4	4	1	4	4	4	4
1	1	1	1	1	1	1	1	1	1	1	1	1	1	1	1	1	1	3	1
3	1	1	2	2	1	2	2	1	3	1	1	3	1	1	1	1	3	3	1
2	2	2	1	2	1	2	2	3	1	1	1	4	2	3	3	3	1	2	2
1	1	1	1	1	1	1	1	1	1	1	1	1	1	1	1	1	1	3	1
2	2	2	2	2	2	2	4	2	3	2	3	2	2	2	1	2	2	4	1
2	2	2	2	3	1	2	1	3	1	1	1	4	1	1	2	1	2	2	1
1	1	1	1	1	1	1	1	1	1	1	1	1	1	1	1	1	1	1	1
1	1	1	1	1	1	1	1	1	1	1	1	1	1	1	1	1	1	1	1
2	2	2	2	2	2	2	2	2	2	2	2	2	2	2	2	2	2	2	2
1	1	1	1	1	1	1	1	4	4	1	1	3	1	1	1	1	1	3	1
1	1	1	1	2	1	1	2	2	1	2	1	3	1	1	1	3	1	3	1
2	1	1	2	3	1	1	2	3	1	1	1	4	1	1	1	1	1	2	2
2	2	2	2	2	2	2	2	2	2	2	2	2	2	2	2	2	2	2	2
1	1	1	1	2	1	1	2	1	1	1	1	3	2	2	1	3	3	1	2
1	1	1	1	2	1	2	3	2	3	2	1	2	1	1	1	3	1	3	1
2	1	2	1	3	2	1	2	2	2	1	1	3	1	1	2	3	2	2	2
3	3	2	3	3	1	1	3	4	1	2	1	2	1	2	2	2	2	2	2
2	1	2	1	4	1	3	2	4	1	1	1	3	1	4	2	2	1	2	2
1	1	1	1	3	1	1	1	4	1	1	1	4	1	1	2	4	1	4	1
2	1	1	1	4	1	1	1	3	1	1	1	1	1	1	1	4	2	4	2
2	2	2	2	3	2	1	2	2	1	2	3	2	2	2	2	2	2	2	2
2	2	2	3	3	3	2	2	3	3	2	3	3	2	2	2	2	2	2	2
2	2	2	2	3	2	2	2	3	1	1	1	3	1	1	2	3	2	3	1
3	4	3	3	3	2	3	3	3	2	2	3	2	1	4	1	2	2	3	1
2	2	2	2	2	1	1	2	1	1	1	1	2	1	2	2	2	2	1	1
2	1	1	1	3	1	1	1	2	1	1	1	4	1	1	1	2	1	3	1
2	1	1	1	2	1	1	2	3	1	2	1	3	2	1	1	3	1	2	1
3	1	3	2	2	2	1	3	3	1	2	2	3	1	3	2	3	1	2	3
2	1	2	2	3	1	1	1	2	1	1	2	2	2	3	2	2	2	3	2
4	1	1	1	4	1	1	1	4	1	1	1	4	1	1	1	4	1	4	1
1	1	1	1	4	1	1	1	3	1	1	1	1	1	1	1	2	1	4	1
1	2	2	2	1	2	2	1	1	1	1	1	4	1	1	3	2	1	1	1
2	2	2	1	3	1	1	1	3	1	1	1	3	1	1	1	3	2	2	2
2	1	1	1	4	1	1	1	3	1	1	1	4	1	1	2	1	1	2	1
2	1	2	3	4	1	1	1	3	1	1	3	3	1	3	1	1	1	1	1
1	1	1	1	4	1	1	1	4	1	1	1	4	1	1	3	4	1	4	1
2	3	2	2	3	3	2	3	3	2	2	3	3	3	2	3	3	3	3	3
2	1	1	1	1	1	1	1	1	1	1	1	1	1	1	1	1	1	1	1
2	2	2	2	2	1	1	1	1	1	1	1	1	1	1	1	1	1	1	1
3	2	2	3	1	4	2	2	3	2	3	3	1	4	2	4	2	3	4	4
2	2	2	2	2	2	2	2	2	2	2	2	2	2	3	1	3	1	3	1
2	2	1	2	2	1	2	2	2	2	2	2	2	2	2	2	1	1	2	2
1	1	1	1	1	1	1	1	1	1	1	1	1	1	1	1	1	1	1	1
2	2	2	2	2	2	2	2	2	2	2	2	2	2	2	2	2	2	2	2
1	2	2	2	2	2	2	2	2	2	2	2	2	2	2	2	2	2	2	2
1	1	1	1	4	1	1	1	4	1	1	1	4	1	1	4	1	2	4	2
4	1	1	1	1	2	2	2	2	2	2	2	2	2	2	3	1	3	2	3
2	2	2	2	2	2	2	2	2	1	1	1	2	1	2	1	1	1	1	1
1	1	1	1	4	1	1	1	4	1	1	1	1	1	1	1	1	1	1	1
1	1	1	1	1	1	1	1	1	1	1	1	1	1	1	1	1	1	1	1
1	2	2	1	3	2	3	1	2	2	3	2	2	1	3	2	3	1	2	1
2	3	3	3	1	3	3	4	2	2	3	3	2	2	4	1	1	1	1	2
1	1	1	1	3	1	1	1	3	1	1	1	3	1	1	3	1	1	3	1
1	2	2	2	2	1	2	1	1	1	1	1	1	1	1	1	1	1	1	1
2	1	3	1	1	1	1	1	1	1	1	1	4	1	1	3	1	1	2	1
2	2	1	2	2	1	1	2	1	1	2	1	2	1	1	1	1	2	1	1
2	2	2	1	3	1	2	1	3	2	1	1	3	2	1	2	2	2	2	2
1	1	2	2	2	1	1	1	1	1	1	1	3	1	2	2	1	1	2	1
3	2	3	2	1	3	2	2	1	2	2	2	3	2	1	1	1	2	4	1
1	1	1	1	2	1	1	2	2	1	1	1	4	1	1	1	3	1	3	2
3	1	1	2	2	1	1	3	3	2	2	2	4	1	3	2	1	1	1	3
2	1	2	2	3	1	2	1	3	2	1	1	4	1	1	1	1	2	3	1
2	2	2	2	3	3	2	2	4	2	4	4	2	4	2	4	3	3	3	2
2	2	2	2	2	2	2	2	2	2	2	2	2	2	2	2	2	2	2	2
1	1	1	1	1	1	1	1	1	1	1	1	1	1	1	1	1	1	1	1
2	2	2	2	2	2	2	2	3	2	2	2	1	1	2	2	2	2	2	2
2	2	2	2	2	2	3	2	3	2	2	3	3	2	2	1	1	1	1	2
1	1	1	1	1	1	1	1	3	1	1	1	1	1	1	2	1	3	4	1
1	1	1	1	1	1	1	1	1	1	1	1	1	2	1	1	1	1	1	1
2	2	2	1	1	1	1	1	4	2	2	2	1	1	1	2	1	1	4	3
1	1	1	1	1	1	1	1	1	1	1	1	1	1	1	1	1	1	1	1
1	1	1	1	1	1	1	1	1	1	1	1	1	1	1	2	1	1	1	1
2	1	1	1	3	1	1	1	3	1	1	1	1	1	3	2	3	1	3	2
1	1	1	1	2	1	1	1	2	1	1	1	4	1	1	2	3	1	3	1
2	2	2	2	2	2	2	2	2	2	2	2	2	2	2	4	4	2	2	2
1	1	1	1	1	1	1	1	1	1	1	1	1	1	1	1	1	1	1	1
1	1	1	1	2	1	1	1	2	1	1	1	3	1	1	1	3	1	3	1
1	1	1	1	1	1	1	1	1	1	1	1	1	1	1	1	1	1	1	1
2	2	2	2	2	2	1	2	1	1	2	1	1	1	1	2	1	1	4	1
1	1	1	1	1	1	1	1	1	1	1	1	1	1	1	2	1	1	1	1
1	1	1	1	1	1	1	1	1	1	1	1	1	1	1	2	2	1	3	1
1	1	1	1	2	1	1	1	3	1	1	1	3	1	1	2	1	2	4	2
1	2	2	2	4	1	2	1	3	1	1	1	4	1	2	1	2	1	1	2
1	1	2	1	3	1	2	2	2	1	1	2	1	1	1	2	1	1	2	1
1	1	1	1	4	1	1	1	4	1	1	1	1	1	1	1	2	1	4	1
2	1	1	2	1	1	2	2	2	2	2	1	3	1	3	1	2	2	1	2
1	1	1	1	4	1	1	1	4	1	1	1	4	1	1	3	1	1	4	2
2	1	2	2	1	1	2	1	2	2	3	1	4	2	1	1	3	2	2	2
2	1	1	1	4	1	2	1	2	1	2	2	3	2	3	2	2	1	1	2
1	1	1	1	4	1	1	1	4	1	1	1	4	1	1	1	4	1	4	1
1	1	1	1	3	1	1	1	3	1	1	1	4	1	1	2	1	1	4	1
1	1	1	1	4	1	1	1	4	1	1	1	4	1	1	1	2	1	3	1
2	2	2	1	1	1	1	2	2	1	2	1	4	1	2	3	3	2	4	2
1	1	2	2	4	1	2	3	1	1	1	2	3	1	3	3	3	1	2	2
2	2	2	1	3	1	1	1	2	1	1	1	3	1	2	2	3	2	2	2
2	1	1	2	1	1	1	1	1	1	1	1	1	1	2	1	1	4	2	1
1	1	1	1	4	1	2	1	3	2	1	1	1	1	1	1	2	1	3	2
1	2	1	1	2	1	1	1	3	1	1	1	1	1	1	1	2	1	3	2
1	1	1	1	2	1	1	2	1	1	1	1	1	1	2	1	3	1	3	1
4	4	4	4	2	4	3	4	2	3	2	1	3	1	2	4	1	2	1	4
2	1	1	1	3	1	1	2	3	2	1	1	1	1	1	2	3	1	3	1
3	1	2	1	3	1	1	2	3	1	1	1	3	1	1	1	3	2	3	2
2	1	1	2	1	1	2	1	3	1	1	1	3	1	2	2	1	2	4	1
1	1	1	1	1	1	1	3	1	2	1	1	3	1	2	2	2	1	3	1
1	1	1	1	3	1	1	1	3	1	1	1	3	1	1	2	3	1	3	1
1	1	1	1	1	1	1	1	4	1	1	1	4	1	1	1	4	1	4	1
1	1	1	1	1	1	1	1	1	1	1	1	1	1	1	1	1	1	1	1
1	1	1	1	3	1	1	1	3	1	1	1	4	1	1	2	3	1	4	1
2	2	2	2	2	2	2	2	2	2	2	2	2	2	2	2	2	2	2	2
4	4	4	4	4	4	4	4	4	4	3	4	4	4	4	4	4	4	4	4
1	2	2	3	2	2	2	2	1	2	1	1	4	1	1	1	1	1	4	1
3	2	2	2	2	1	1	1	1	1	1	1	1	1	1	2	2	1	1	2
2	4	1	1	4	1	1	1	3	1	1	1	4	1	1	3	3	3	4	1
1	1	1	1	4	1	2	2	3	1	1	1	4	1	1	1	3	1	3	1
3	3	3	3	3	3	3	3	3	3	2	2	2	2	3	3	3	3	2	2
3	1	1	2	1	1	1	1	1	1	1	1	4	1	1	1	1	1	2	1
1	1	1	1	3	1	1	1	3	1	1	1	4	1	2	3	2	1	2	1
2	2	2	1	2	1	2	2	4	1	1	1	2	2	1	2	2	1	1	2
3	2	2	2	2	2	2	2	2	2	2	2	2	2	2	2	2	2	2	2
2	3	1	2	2	2	2	2	2	3	1	1	2	2	3	2	2	2	2	2
1	1	1	1	1	1	1	1	1	1	1	1	1	1	1	1	1	1	1	1
4	1	1	1	4	1	2	2	4	2	2	1	4	1	2	2	2	2	4	2
2	2	2	2	2	2	2	1	2	2	2	2	2	2	2	2	2	2	2	2
3	2	3	3	1	2	4	4	3	1	3	2	2	2	2	2	2	1	1	2
2	2	2	2	2	1	3	2	2	1	2	1	1	1	3	1	3	2	3	2
1	1	1	1	2	1	1	2	3	1	1	1	4	1	2	1	2	1	2	2
3	2	2	2	2	2	2	2	2	2	2	2	2	2	2	3	3	2	2	2
1	1	1	1	4	1	1	1	4	1	2	1	4	2	1	1	1	1	3	2
1	1	1	1	3	1	2	2	2	1	1	1	4	1	1	2	3	2	3	1
2	1	1	1	2	1	1	2	2	1	1	2	2	1	1	1	3	2	4	2
2	2	2	2	2	1	2	2	3	2	2	2	3	1	2	2	2	2	3	1
1	1	1	1	4	1	1	1	1	1	1	1	4	1	1	2	4	1	4	1
1	1	1	1	1	1	1	1	1	1	1	1	1	1	1	1	1	1	4	2
2	1	2	2	2	1	3	3	2	2	3	3	2	1	2	3	3	2	2	3
1	1	1	1	1	1	1	1	2	1	1	1	1	1	1	1	1	1	2	2
2	1	1	1	3	1	2	1	3	1	1	1	3	1	1	2	3	1	3	1
2	1	2	1	3	1	1	3	2	1	1	1	3	1	1	1	3	2	2	1
1	1	1	1	3	1	2	2	2	1	1	1	2	1	2	2	2	1	3	1
3	3	2	2	2	3	2	2	2	3	2	2	2	2	1	1	2	3	2	2
2	2	3	3	2	3	3	3	2	3	3	1	1	1	1	1	2	2	2	2
1	1	1	1	1	1	1	1	4	1	1	1	1	1	1	1	4	1	4	2
2	1	2	1	3	1	2	1	1	1	1	1	4	1	1	2	1	1	2	2
1	1	1	1	1	1	1	1	4	1	1	1	3	1	1	1	3	1	3	2
1	1	1	1	1	1	2	2	1	1	3	1	3	2	2	2	3	1	2	1
1	3	1	1	1	1	1	2	1	1	1	1	1	1	1	1	1	1	2	3
1	1	1	1	2	1	1	1	2	1	1	1	3	1	2	2	1	1	2	1
3	2	2	4	4	1	2	3	3	2	2	2	3	2	3	2	2	2	1	3
2	1	1	1	4	2	1	2	2	1	1	1	3	1	1	2	3	2	2	1
2	2	2	2	2	2	2	2	2	2	2	2	2	2	2	2	2	2	2	2
2	1	1	1	2	1	1	1	2	1	1	1	1	1	1	1	2	1	2	1
3	2	2	4	2	1	4	4	2	1	3	3	3	2	1	3	2	1	1	1
2	1	1	1	3	1	1	1	1	1	2	2	3	1	4	3	3	3	3	2
1	1	1	1	3	1	1	1	2	1	1	1	4	1	1	2	3	2	3	2
2	2	2	2	1	3	3	4	1	1	1	2	4	2	1	2	1	4	4	2
1	1	1	1	4	1	1	1	2	1	1	1	4	1	1	1	4	1	4	1
2	2	2	2	2	2	2	2	2	2	2	2	2	2	2	2	2	2	2	2
1	1	1	1	3	1	1	1	1	1	1	1	1	1	1	1	1	1	1	1
1	1	1	1	3	1	1	1	3	1	1	1	4	1	1	1	4	2	1	1
2	1	1	1	1	1	1	1	3	1	1	1	3	1	2	1	2	1	2	1
2	1	2	1	1	1	1	2	3	1	1	2	4	1	1	1	3	1	3	1
1	1	1	1	1	1	2	1	1	1	2	1	1	1	2	2	1	2	1	1
1	1	1	1	1	1	1	1	2	1	1	1	1	1	1	2	2	2	3	1
1	1	2	1	3	1	1	2	3	2	1	1	3	2	1	2	1	1	2	1
2	2	2	2	2	2	2	2	2	2	2	1	1	1	1	1	1	1	3	1
1	2	2	2	2	1	1	1	2	2	2	2	3	1	1	1	2	1	1	1
1	1	1	1	1	1	1	1	1	1	1	1	1	1	1	1	1	1	1	1
1	1	1	1	1	1	1	1	1	1	1	1	1	1	1	1	1	1	1	1
2	2	2	2	2	2	2	2	2	2	2	2	2	2	2	2	2	2	2	2
2	2	2	2	2	2	2	2	2	2	2	2	2	2	2	2	2	2	2	2
3	2	2	1	2	2	1	2	2	2	2	2	2	3	2	3	2	2	4	3
2	2	1	2	2	2	2	2	2	2	2	2	2	2	2	2	2	2	2	2
2	2	2	2	2	2	2	2	2	2	2	2	2	2	2	2	2	2	2	2
2	2	2	2	2	2	1	1	2	1	1	1	4	1	2	2	2	2	2	2
1	1	1	1	1	1	1	1	1	1	1	1	1	1	1	1	1	1	1	1
2	2	2	2	2	2	2	3	2	2	2	2	3	2	2	2	2	2	2	2
2	1	1	1	2	1	2	2	3	1	1	1	3	1	2	2	3	2	1	1
2	1	1	1	3	1	1	1	2	1	1	1	4	1	1	2	3	1	3	1
3	2	2	1	3	1	1	2	2	2	1	1	3	2	2	2	2	2	3	1
2	2	2	1	2	1	1	2	3	2	2	2	3	2	1	1	3	2	4	1
3	3	3	1	2	1	1	1	2	2	1	1	3	1	1	2	2	2	3	2
2	2	2	1	1	1	1	1	1	2	2	2	2	2	2	2	2	2	2	3
2	1	2	2	2	1	1	1	2	1	1	1	2	1	1	1	1	1	3	1
2	1	2	2	1	2	2	2	2	2	2	2	2	2	2	3	2	1	2	1
1	1	1	1	4	1	1	1	4	1	1	1	4	1	1	1	4	1	4	1
3	1	2	1	4	1	1	1	3	1	1	1	1	1	1	1	1	2	1	1
2	2	2	2	2	2	2	2	2	2	2	1	4	1	1	3	3	2	2	2
2	1	2	1	1	2	1	2	3	2	1	1	3	2	1	4	2	3	2	1
2	1	2	1	2	1	1	1	1	1	1	2	3	1	2	1	2	1	4	1
3	1	1	1	1	1	1	2	3	1	1	1	1	1	1	2	1	1	1	1
3	2	2	1	2	1	1	1	2	2	1	1	3	1	1	2	2	2	2	2
2	2	2	2	2	1	1	1	3	1	1	1	3	1	1	1	3	1	3	1
4	3	2	2	3	3	1	2	2	1	2	2	3	2	3	3	3	2	3	1
3	1	2	1	4	1	1	2	1	2	1	1	4	1	2	2	2	1	2	1
3	3	1	1	2	1	1	2	1	1	1	1	1	1	1	1	1	1	1	2
2	2	2	3	2	2	1	2	2	2	2	2	3	2	2	2	2	2	3	3
2	2	2	2	4	1	2	2	4	1	1	2	1	1	2	1	1	1	2	1
3	1	1	1	4	1	1	1	4	1	1	1	1	1	1	1	2	2	4	1
2	1	1	2	3	1	1	2	4	1	1	1	4	2	1	1	4	2	2	1
2	1	2	1	3	1	1	3	1	1	2	2	4	1	2	2	3	2	4	1
1	1	1	4	1	1	1	1	1	1	1	1	1	1	1	1	1	1	4	1
4	1	2	1	3	1	1	2	4	2	2	1	4	1	1	1	4	4	1	2
1	1	1	1	2	1	1	1	3	2	1	1	1	1	1	1	2	2	3	1
2	1	2	2	2	1	1	1	1	2	1	1	4	1	2	2	1	1	4	1
2	2	1	1	1	1	2	2	2	2	2	2	2	2	2	2	2	2	2	2
2	2	2	2	3	2	2	2	2	2	2	2	2	2	2	2	2	2	2	2
2	2	2	3	3	2	2	2	2	2	2	2	4	2	1	4	3	2	3	1
2	1	1	1	3	1	2	1	3	1	1	1	4	1	1	3	3	2	3	1
2	2	2	2	2	1	2	2	2	2	2	1	3	1	1	2	3	2	1	1
1	1	1	1	4	1	1	1	4	1	1	1	4	1	1	2	1	1	3	1
2	2	2	2	2	2	2	2	2	1	2	1	2	2	2	3	3	1	3	1
1	1	1	1	2	1	1	1	2	1	1	1	1	1	1	1	2	1	3	1
2	1	1	1	4	1	1	2	3	1	1	1	4	1	1	1	2	2	4	1
2	1	1	2	3	1	1	2	2	2	2	2	2	2	2	2	2	3	2	1
2	1	1	1	3	1	2	1	3	1	1	1	4	1	1	2	4	2	3	2
1	1	1	1	4	1	1	1	3	1	1	1	1	1	1	1	2	1	3	1
2	1	1	2	4	1	1	2	3	2	1	1	4	1	1	4	3	1	4	1
2	1	1	1	2	1	2	1	4	2	2	2	2	2	2	1	1	2	2	2
1	1	2	1	3	1	1	1	3	1	1	1	1	1	1	1	3	1	3	2
2	2	2	2	3	1	2	2	4	2	2	2	4	2	3	1	4	1	4	1
1	1	1	1	3	1	1	4	3	1	1	1	4	1	1	1	3	1	3	1
1	1	1	1	4	1	2	1	3	1	1	1	1	1	1	1	4	4	4	2
2	1	1	4	2	1	2	4	3	2	4	3	4	1	1	2	2	1	2	2
2	2	1	2	2	1	2	2	3	1	2	1	3	2	2	2	3	1	2	2
2	1	1	1	4	1	1	2	3	1	1	1	4	1	1	1	3	2	2	1
1	2	2	2	4	1	1	4	2	1	2	2	3	1	2	2	2	1	4	2
2	1	1	1	3	1	1	2	2	1	1	1	4	2	1	3	3	1	2	2
1	1	1	1	1	1	1	1	3	1	1	1	3	1	2	3	3	1	3	1
3	3	2	1	4	2	2	2	2	1	1	1	4	1	1	3	2	2	3	1
2	1	1	3	2	1	1	2	2	1	1	2	3	1	1	3	2	3	2	1
1	1	1	1	3	1	1	1	3	1	1	1	1	1	1	2	1	2	2	1
4	2	2	4	4	1	3	4	4	2	3	3	3	3	3	3	1	2	2	1
2	1	2	1	1	1	1	1	3	1	1	1	1	1	1	1	1	1	3	1
2	1	1	1	1	1	1	2	1	1	1	1	4	2	2	3	3	2	2	1
2	1	1	1	1	1	2	1	2	2	2	1	4	1	1	1	3	2	2	2
3	3	3	4	2	2	2	2	1	2	2	2	3	2	3	3	1	2	1	3
3	2	4	3	1	2	1	2	1	2	1	1	2	2	1	4	1	2	2	2
2	1	1	1	3	1	1	1	3	2	1	1	1	1	1	1	4	3	3	1
1	1	1	1	2	1	1	1	2	1	1	1	3	1	1	1	2	1	2	1
2	1	2	1	4	3	3	3	2	2	1	1	3	1	3	3	3	2	2	1
1	1	1	1	1	1	1	1	1	1	1	1	1	1	2	2	4	1	4	1
2	2	1	1	3	2	2	2	3	2	1	1	3	1	1	2	2	2	3	1
2	2	2	2	2	2	2	1	1	1	2	2	2	2	2	2	2	2	2	2
2	2	2	2	1	2	3	3	2	2	2	2	2	2	2	2	2	2	2	2
2	2	2	2	2	2	2	2	2	2	2	2	2	2	2	2	2	2	2	2
2	2	2	2	2	2	2	2	2	2	2	2	2	2	2	2	2	2	2	2
2	2	2	2	2	2	2	2	2	2	2	2	2	2	2	2	2	2	2	2
2	2	2	2	2	2	2	2	2	2	2	2	2	2	2	2	2	2	2	2
1	1	1	1	2	1	1	1	2	1	1	1	1	1	2	2	2	1	2	1
2	2	1	1	3	1	2	3	2	1	1	1	4	1	1	1	4	1	4	1
3	2	2	2	2	2	3	3	3	2	3	3	3	2	3	2	2	2	2	2
2	2	2	2	2	2	2	2	2	2	2	2	2	2	2	2	2	2	2	2
4	4	4	4	1	2	4	4	1	3	4	4	2	2	2	2	2	2	1	2
4	2	4	2	2	4	1	1	1	2	1	1	1	1	1	1	1	1	1	1
3	1	1	2	2	1	1	1	3	1	1	1	4	1	1	2	1	1	2	2
4	2	2	2	2	1	2	2	2	1	2	2	1	1	1	4	1	2	2	1
2	1	1	1	2	2	1	2	2	1	1	1	3	1	2	1	1	2	3	1
1	1	1	1	4	2	1	2	4	1	1	2	4	1	1	1	1	2	4	1
1	1	1	4	4	1	1	1	1	1	1	1	1	1	1	4	4	1	4	1
2	2	1	1	1	1	1	1	2	1	1	1	1	1	1	1	1	1	3	1
2	1	1	1	3	1	1	2	1	1	1	1	1	1	1	2	2	1	2	1
2	1	1	1	3	1	1	2	3	1	2	1	4	1	2	2	3	2	3	1
2	1	2	1	3	1	1	1	2	1	1	1	3	1	2	2	2	1	1	2
2	2	1	1	3	1	1	1	2	1	1	1	4	1	2	1	3	3	3	2
1	1	1	1	4	1	1	1	4	1	1	1	4	1	1	2	1	1	4	1
2	1	1	1	1	1	1	1	1	1	1	1	1	1	1	1	1	1	3	1
2	1	2	3	1	1	2	1	1	1	1	1	4	1	2	2	4	3	3	2
2	1	2	2	3	1	2	2	2	1	2	1	1	1	1	1	1	1	3	1
2	2	2	1	3	1	2	2	2	2	2	2	2	1	2	2	3	2	2	1
3	2	2	2	1	1	2	1	3	2	2	2	2	2	2	3	1	2	2	1
2	2	1	1	1	1	2	2	3	1	3	2	2	2	2	2	2	2	1	1
3	1	2	1	3	2	2	3	3	2	1	1	3	2	1	2	1	3	3	2
1	1	1	2	3	1	2	2	2	2	2	2	2	2	2	2	1	1	1	1
3	1	2	1	3	1	2	3	3	2	2	3	4	1	3	3	3	1	3	1
1	1	1	1	3	1	2	1	1	1	1	2	3	1	3	2	2	3	3	1
2	2	2	2	2	1	2	1	2	2	2	1	1	1	2	1	2	2	2	2
2	1	1	1	3	1	2	2	2	1	1	1	3	1	1	2	2	1	3	1
3	1	1	1	4	1	1	1	4	1	1	1	4	1	1	1	1	4	4	1
2	1	1	1	2	1	1	1	3	1	2	2	4	1	1	1	3	2	4	2
3	2	1	1	4	2	2	2	4	1	1	2	3	1	1	2	1	1	3	1
2	3	3	3	2	1	2	3	2	2	2	1	3	2	2	2	2	3	4	2
1	1	1	1	4	1	1	1	1	1	1	1	1	1	1	1	1	1	1	1
1	1	4	2	1	1	2	2	1	3	2	3	2	1	4	1	1	3	1	2
3	3	3	2	1	2	2	3	1	1	3	2	3	1	3	1	2	1	1	3
3	2	2	2	1	1	4	2	2	2	1	1	4	1	1	4	3	4	3	1
1	1	1	2	3	1	1	1	3	1	1	1	4	1	1	1	3	1	4	1
1	1	1	1	1	1	1	2	2	1	1	1	3	1	1	2	1	1	3	1
2	2	2	1	3	1	2	2	3	1	1	1	4	1	2	1	2	1	2	2
2	3	2	2	1	1	3	2	1	1	2	2	2	1	2	1	2	1	1	2
1	1	1	1	1	1	2	2	2	2	3	3	2	1	1	2	1	3	1	1
2	1	1	1	3	2	3	2	2	2	2	1	4	1	2	3	4	3	4	1
1	2	1	1	3	1	4	3	4	1	3	1	4	1	1	2	1	1	3	1
2	2	2	2	2	1	1	1	1	1	1	1	1	1	1	1	1	1	3	2
1	1	1	1	3	1	1	1	1	1	1	1	1	1	2	1	3	3	2	2
2	1	2	1	2	1	2	2	2	2	3	1	1	1	1	1	1	2	2	1
2	1	1	1	2	1	1	2	3	1	1	1	3	1	2	1	2	1	3	2
3	1	2	2	3	2	2	3	2	1	2	1	1	2	2	4	3	2	3	1
3	1	2	2	3	1	1	2	2	1	1	1	3	1	1	2	2	1	4	2
3	1	3	1	3	1	1	4	2	2	2	3	4	1	1	2	3	1	3	2
2	2	2	1	1	1	1	1	1	1	1	1	1	1	1	1	1	1	1	1
1	1	3	1	2	1	1	3	3	1	2	1	3	1	3	3	1	1	2	3
1	1	1	1	1	1	1	1	1	1	1	1	1	1	1	1	1	1	1	1
2	1	2	2	1	3	1	2	1	1	1	1	4	1	3	1	2	1	2	1
3	2	2	2	2	1	1	2	2	2	1	1	3	1	1	1	3	3	3	1
1	1	1	1	1	1	1	1	1	1	1	1	1	1	1	1	1	1	1	1
2	1	2	1	1	1	2	1	3	1	2	1	4	2	1	1	3	1	3	1
1	1	1	1	1	1	1	1	1	1	1	1	1	1	1	1	1	1	2	1
3	2	2	1	4	1	2	1	3	1	1	1	3	1	1	2	3	1	4	2
2	1	2	1	1	1	1	1	1	1	1	2	3	1	1	2	1	2	3	1
1	1	1	1	1	1	2	1	3	1	1	1	4	1	1	2	4	2	4	2
1	1	1	1	1	1	1	1	1	1	1	1	1	1	1	2	2	1	2	1
1	1	1	1	1	1	1	1	1	1	1	1	1	1	1	2	1	1	1	2
2	2	2	1	1	1	1	1	1	1	1	1	1	1	1	1	1	1	1	1
2	2	2	2	2	2	2	2	2	2	2	2	2	2	2	2	2	2	2	2
3	3	3	3	2	2	2	2	2	2	2	2	2	2	2	2	2	2	2	2
2	2	2	2	2	2	2	2	2	2	2	2	2	2	2	2	2	2	2	1
1	1	1	4	1	1	4	4	4	4	1	1	4	1	3	2	1	1	1	2
2	2	2	2	2	2	2	2	2	2	2	2	4	1	2	2	2	2	3	1
1	1	1	1	1	1	1	1	1	2	1	1	3	2	2	2	1	1	2	2
2	2	2	2	2	2	2	2	2	2	2	2	2	2	2	4	2	2	1	2
4	1	1	1	4	1	1	1	4	2	1	1	4	1	2	2	1	3	3	1
4	1	1	1	3	1	1	1	4	1	1	1	1	1	1	1	4	1	4	1
3	1	1	2	2	1	1	1	4	2	1	1	1	1	2	2	2	1	4	1
2	2	2	1	3	1	3	1	3	1	3	1	3	3	1	1	1	1	3	1
4	1	3	4	4	1	3	3	4	4	3	1	4	1	1	3	3	1	2	1
2	1	1	1	4	1	1	1	4	1	1	1	4	1	1	2	4	3	4	1
2	2	2	1	2	3	2	3	3	2	1	1	1	1	2	2	3	2	2	1
2	1	1	1	2	1	3	2	1	1	1	1	3	1	1	2	2	2	1	2
4	4	4	4	1	1	1	4	2	1	1	2	1	1	3	3	3	1	1	3
2	2	2	2	2	2	2	2	2	2	2	2	1	1	2	2	1	2	1	3
2	2	2	2	2	2	2	2	2	2	2	2	2	1	2	2	2	2	1	2
2	2	2	2	1	1	1	3	2	2	2	1	2	1	1	2	2	1	2	1
1	1	1	1	4	1	3	1	2	1	1	1	3	1	1	3	1	1	3	1
1	1	1	1	2	1	1	1	2	1	1	1	3	1	1	1	2	1	3	2
2	2	2	2	2	1	1	3	2	2	2	1	1	1	3	2	2	2	2	2
2	2	2	2	2	2	3	3	2	2	2	2	2	2	3	3	2	2	2	2
1	1	1	1	4	1	1	1	3	1	2	1	4	1	1	3	1	1	2	2
2	1	1	1	1	1	2	2	3	1	2	1	4	1	2	2	2	3	1	1
4	4	2	2	2	2	2	3	2	2	2	3	2	2	2	4	1	3	1	1
1	2	2	1	3	1	1	1	3	1	1	1	3	1	1	1	3	2	2	1
2	2	2	2	2	2	2	2	2	2	2	2	2	2	2	2	2	2	2	2
1	1	1	1	1	1	1	1	1	1	1	1	1	1	1	1	1	1	1	1
3	3	2	2	2	4	3	3	2	3	2	3	2	2	2	3	4	2	3	1
2	1	1	1	3	1	1	2	3	1	1	1	4	1	2	1	3	1	2	1
3	2	2	2	3	2	2	3	2	2	1	1	3	2	2	3	3	2	2	2
3	1	2	3	4	1	3	2	3	1	2	1	4	1	4	1	1	1	2	2
1	1	1	1	1	1	1	1	1	1	1	1	4	1	1	2	1	1	3	1
2	1	2	3	1	3	2	3	4	2	2	2	1	2	4	4	1	1	2	3
3	1	1	1	2	1	1	1	4	1	1	1	3	1	1	1	4	1	2	1
2	2	3	3	1	2	1	3	1	1	2	2	4	1	2	3	4	1	1	2
3	1	2	1	2	1	1	1	3	1	1	1	4	1	1	2	3	1	4	1
2	1	2	2	3	1	1	1	4	1	1	1	1	1	1	1	2	2	4	2
1	1	1	1	4	4	1	4	4	1	1	1	4	1	4	1	4	1	4	1
1	1	1	1	4	1	1	1	4	1	1	1	4	1	3	1	4	1	4	1
1	1	1	3	3	1	2	1	3	1	1	1	1	1	1	1	1	1	1	2
2	1	1	1	4	1	1	1	4	1	1	2	4	2	1	1	3	2	4	2
1	1	1	1	4	1	1	1	4	1	1	1	4	1	1	3	3	2	4	2
2	2	2	1	3	1	2	2	3	2	2	1	3	1	1	2	3	2	3	2
2	1	3	2	2	1	2	3	2	1	1	1	4	1	3	2	3	1	2	1
1	1	1	1	2	1	1	1	4	1	1	1	1	1	2	1	4	1	4	1
1	1	1	1	4	1	1	1	3	1	1	1	1	1	1	2	3	1	1	1
3	3	3	3	3	3	3	3	3	3	3	3	3	3	3	3	3	3	3	3
1	1	1	1	1	1	1	1	1	1	1	1	1	1	1	1	1	1	1	1
1	1	1	1	1	1	1	1	1	1	1	1	1	1	1	1	1	1	1	1
2	2	2	2	2	2	2	2	2	2	2	2	2	2	2	2	2	2	2	2
4	4	4	4	4	4	4	4	4	4	4	4	4	4	4	4	4	4	4	4
1	1	1	1	1	1	1	1	1	1	1	1	1	1	1	2	2	1	3	2
1	1	1	1	4	1	1	1	4	1	1	1	4	1	1	1	4	1	4	1
1	1	1	1	1	1	1	1	1	1	1	1	1	1	1	1	1	1	1	1
1	1	1	1	4	1	1	1	4	1	1	1	1	1	1	1	1	1	4	1
1	1	1	1	3	1	2	1	2	1	1	1	3	1	1	2	2	2	2	1
2	2	2	2	2	2	2	2	2	2	2	2	2	2	2	2	2	2	2	2
1	2	1	2	1	2	1	1	1	1	1	1	1	1	1	1	1	1	2	2
1	1	1	1	1	1	1	1	2	1	1	1	1	1	1	1	1	1	1	1
2	2	2	2	2	2	2	2	2	2	2	2	2	2	2	2	2	2	2	2
1	1	1	1	4	1	1	1	4	1	1	1	4	1	1	1	4	1	4	1
2	1	1	3	2	1	1	1	2	1	1	1	1	1	3	2	2	1	4	2
1	1	1	1	4	1	1	1	4	1	1	1	4	1	1	1	4	1	4	2
1	1	1	1	3	1	1	1	2	1	1	2	4	1	1	2	2	1	4	1
2	2	2	1	3	1	1	1	3	1	1	1	3	1	1	2	2	1	3	2
1	1	1	1	1	1	1	1	4	1	1	1	4	1	1	1	1	4	4	1
1	1	1	1	4	1	1	1	4	1	1	1	4	1	1	1	1	1	4	1
1	1	1	1	3	1	1	1	1	1	1	1	1	1	1	1	3	1	1	2
2	1	1	1	1	1	1	1	3	1	1	1	4	1	1	2	1	2	1	1
3	3	3	1	1	2	4	4	2	2	2	2	1	1	3	3	1	1	1	4
2	2	1	2	3	2	2	3	2	2	2	2	2	1	2	2	1	2	1	1
3	2	2	1	3	2	1	1	2	2	1	1	2	1	1	1	3	2	2	1
2	1	2	1	4	1	1	2	4	1	1	1	4	1	1	2	4	2	4	1
2	1	1	1	2	1	1	2	3	2	1	1	3	1	2	1	1	2	3	2
1	1	1	2	4	1	1	3	3	2	1	1	4	1	1	1	4	1	3	1
2	2	2	2	2	2	2	2	2	2	2	2	2	2	2	2	2	2	2	2
1	1	1	1	1	1	1	1	1	1	1	1	1	1	1	1	1	1	1	1
1	1	1	1	1	1	2	1	1	2	1	1	1	1	4	1	4	2	4	2
2	2	2	2	2	2	2	2	2	2	2	2	2	2	2	2	2	2	2	2
3	1	1	1	1	1	1	1	1	1	1	1	1	1	2	1	3	1	3	2
2	3	3	3	3	3	2	2	3	2	3	3	3	3	1	1	2	2	1	1
1	1	2	2	3	2	1	1	3	1	1	2	3	2	1	3	3	1	3	1
3	2	2	2	2	2	2	2	2	2	2	2	4	2	2	2	2	2	2	2
2	1	2	1	3	1	1	1	2	1	1	1	1	1	2	1	1	1	4	2
2	2	2	2	2	2	2	2	2	2	2	2	2	2	2	2	2	2	2	2
4	3	3	2	2	1	2	4	2	2	2	2	4	2	3	3	2	4	2	3
2	1	1	1	4	1	2	2	2	1	2	1	4	1	1	2	2	1	4	1
2	1	2	2	3	1	2	3	2	1	2	2	3	1	2	2	3	1	3	1
1	1	1	1	2	2	2	2	2	2	1	1	4	1	1	3	2	1	2	2
2	2	2	3	1	1	3	3	1	1	2	1	3	1	2	3	1	1	2	1
1	1	1	1	3	1	1	1	3	1	1	1	3	1	1	2	2	1	3	1
1	1	1	1	1	1	1	1	2	1	1	1	4	1	1	1	4	1	4	1
2	1	2	3	1	3	1	2	3	3	2	1	2	1	1	2	2	1	2	2
1	1	1	1	1	1	1	1	2	1	1	1	1	1	1	2	1	2	2	1
2	2	4	3	2	2	3	3	2	2	3	3	2	3	3	4	2	2	2	2
1	1	1	1	3	1	1	1	3	1	1	1	1	1	1	1	1	1	3	1
2	2	3	1	1	1	1	1	2	1	1	1	3	1	1	1	2	1	3	1
3	2	2	1	3	2	2	2	2	2	3	3	2	2	3	2	2	2	2	2
2	2	2	1	1	1	1	1	3	3	3	2	3	1	1	2	3	2	2	2
3	2	3	2	2	2	2	2	2	2	1	1	3	1	1	1	3	3	2	1
3	2	2	2	3	2	3	3	2	2	3	2	3	2	2	3	3	2	3	2
2	1	1	1	3	1	1	1	2	1	1	1	3	1	1	2	3	1	3	2
4	4	2	2	3	1	1	1	1	1	1	1	3	1	2	2	3	2	4	1
2	1	3	2	1	1	2	3	1	1	1	1	2	1	2	2	2	1	1	2
2	1	1	1	2	1	1	1	2	1	1	1	4	1	1	2	4	2	2	2
2	2	2	2	2	2	2	2	2	2	2	2	2	2	2	2	2	2	2	2
2	1	1	1	4	1	2	1	3	1	2	1	4	1	2	3	4	2	4	2
2	2	2	2	4	1	1	1	1	1	1	1	1	1	1	1	1	1	1	1
3	2	2	2	2	1	1	3	2	1	2	2	4	1	2	2	3	2	2	2
2	1	1	1	3	1	2	2	2	1	1	1	4	1	1	2	3	1	4	2
2	2	2	2	2	1	1	2	2	2	2	1	3	1	1	1	2	2	1	1
3	2	2	1	3	2	1	2	2	2	1	1	4	1	1	2	1	3	3	1
2	1	2	1	1	1	2	2	2	1	2	1	3	2	2	3	3	2	3	2
2	1	1	2	1	1	1	1	3	1	1	1	1	1	1	1	1	1	3	1
2	2	3	1	1	1	1	1	2	1	1	1	3	1	1	1	3	2	2	1
3	1	2	1	1	1	1	2	3	1	1	2	4	2	1	2	2	2	2	1
3	2	2	1	2	2	1	1	2	2	2	2	2	2	2	2	2	2	1	1
1	1	1	1	4	1	1	1	4	1	1	1	4	1	1	1	4	1	2	2
1	2	1	1	1	1	2	2	2	1	2	1	4	1	1	2	3	1	3	1
1	1	2	1	1	1	1	2	3	1	1	1	4	1	2	2	2	1	1	1
1	1	1	1	3	1	1	2	3	1	1	1	3	1	1	3	3	1	3	1
3	2	3	3	3	3	3	2	2	2	2	3	2	2	2	2	3	3	3	2
2	1	1	1	1	1	1	1	2	1	1	1	4	1	1	1	4	2	3	1
3	2	2	2	2	2	3	3	2	1	2	1	3	2	2	3	2	1	2	3
2	2	3	2	3	2	3	2	3	3	2	2	2	3	2	2	2	2	2	2
3	1	1	2	3	2	3	1	2	3	3	2	2	2	4	3	3	3	4	3
1	2	3	4	3	2	3	3	3	2	4	4	3	2	2	3	3	2	3	3
2	1	1	1	1	1	1	1	2	1	1	1	2	1	2	2	2	2	2	1
2	2	2	2	2	2	2	2	2	2	2	2	2	2	2	2	2	2	2	2
3	3	3	3	3	3	3	3	3	3	3	3	4	2	3	3	3	2	2	1
2	2	2	2	2	2	2	2	2	2	2	2	2	2	2	2	2	2	2	2
2	2	3	3	3	3	3	2	3	3	2	2	3	3	3	3	2	3	3	3
2	1	1	1	4	1	1	2	3	2	1	1	1	1	1	2	2	2	2	1
2	3	3	3	3	4	3	3	3	3	3	3	2	3	3	2	3	2	3	2
2	1	2	2	1	2	1	2	1	1	1	2	2	1	1	3	1	2	1	1
3	2	1	1	2	1	1	2	4	2	2	2	2	1	1	2	2	3	3	2
1	1	3	3	2	1	3	3	2	1	3	2	3	1	2	1	1	2	2	2
2	1	2	2	2	1	1	1	4	1	1	1	1	1	1	2	1	3	3	1
2	2	3	3	3	2	3	3	3	2	2	3	2	2	3	2	3	3	2	3
1	1	1	1	3	1	1	1	2	1	1	1	1	1	1	1	1	1	2	1
2	1	2	2	3	1	1	2	3	2	1	2	3	2	1	1	3	2	2	1
2	2	2	1	3	1	1	1	2	1	1	1	3	1	1	2	1	2	2	1
2	2	2	2	2	2	2	2	2	2	2	2	1	1	1	1	1	2	3	1
2	2	2	2	1	1	1	2	2	2	1	1	2	1	2	2	1	2	2	2
1	1	1	1	3	1	1	1	2	1	1	1	3	1	1	2	3	1	3	1
2	1	1	2	2	1	1	2	2	2	1	2	3	1	3	3	2	3	2	1
2	1	2	3	3	3	4	1	2	2	3	2	3	2	4	4	1	3	2	3
4	2	2	3	3	2	2	2	3	2	2	3	2	3	2	2	2	1	2	2
3	2	3	2	2	3	3	2	2	2	2	1	2	1	1	2	4	2	2	2
2	2	2	2	3	1	1	2	2	2	1	1	4	1	2	2	4	2	3	2
3	3	3	2	2	3	3	2	2	1	2	2	2	1	2	3	3	3	3	2
2	2	3	2	3	1	2	2	2	2	2	1	4	1	3	2	2	2	2	1
2	1	1	2	1	1	1	1	3	2	1	1	3	1	1	1	2	2	2	1
1	1	1	1	3	2	1	3	2	1	1	1	3	1	1	1	3	1	2	1
2	1	1	1	4	1	1	1	2	1	1	1	4	1	1	2	1	1	3	1
2	1	1	2	1	1	2	2	3	1	2	2	2	1	1	1	3	2	3	2
2	1	2	3	2	1	1	3	2	1	1	1	4	1	2	2	1	1	2	1
3	2	3	3	2	2	2	3	1	2	3	3	3	2	3	3	1	3	3	2
1	1	1	1	2	1	1	1	2	1	1	1	1	1	1	1	4	2	3	1
2	2	2	2	3	1	2	2	2	2	2	2	3	1	2	3	3	1	2	2
2	2	2	2	2	2	1	2	3	2	1	2	3	1	2	2	2	2	3	2
1	1	1	1	2	1	1	1	2	1	1	1	1	1	1	1	1	3	2	1
2	1	3	3	3	1	1	3	1	2	1	1	1	1	1	2	1	1	1	1
2	2	2	2	2	2	2	2	2	2	2	2	2	2	2	3	2	2	2	2
2	1	1	1	3	1	1	1	3	2	1	1	3	1	1	1	2	2	3	1
1	1	1	1	2	1	1	2	4	1	2	2	3	1	1	2	3	2	1	2
2	1	1	1	3	1	1	1	1	1	1	1	3	1	1	2	1	1	2	1
2	1	2	1	1	1	1	1	3	1	2	2	1	1	4	4	2	2	1	3
4	4	4	4	4	4	4	4	2	2	4	3	3	3	3	3	2	2	1	2
3	1	1	1	2	1	3	1	2	1	1	1	3	1	2	1	1	1	4	1
2	3	1	3	3	3	3	3	3	3	3	3	3	3	3	3	3	2	2	2
1	1	1	1	1	1	1	1	1	1	1	1	2	1	1	1	1	1	2	1
1	1	1	1	3	1	1	1	2	1	2	2	4	2	1	2	2	2	4	1
3	1	1	1	1	1	1	1	1	2	3	3	2	2	3	3	3	3	4	4
2	2	1	1	2	2	2	2	2	2	2	1	1	2	3	1	1	1	2	1
1	1	2	2	2	2	2	2	2	2	2	2	3	2	3	2	3	2	1	1
1	1	1	1	1	1	1	3	2	1	2	1	3	1	2	2	3	2	2	1
1	1	1	1	3	1	1	1	4	1	2	1	3	1	1	1	3	3	3	1
3	1	3	3	1	1	1	1	1	1	1	1	1	2	1	1	1	1	1	1
3	2	1	3	1	1	1	2	2	1	1	1	4	1	1	1	2	1	3	2
1	1	1	1	3	1	1	1	2	1	1	1	3	1	2	2	1	1	2	1
2	1	1	1	2	1	2	2	1	3	1	1	1	1	1	2	2	4	4	1
2	1	2	1	2	1	1	2	2	1	1	1	2	2	2	1	2	2	2	2
1	2	2	1	3	1	1	1	3	1	1	1	4	1	1	2	2	1	2	1
2	2	3	3	2	3	3	4	2	3	2	3	3	3	2	3	2	3	2	3
1	3	2	2	2	1	1	2	2	2	2	3	3	2	3	1	2	2	2	2
2	2	2	2	1	2	3	3	2	2	2	2	2	2	2	2	1	2	2	2
3	2	2	3	3	2	3	2	2	2	3	1	2	2	1	2	2	2	3	2
2	3	3	3	2	2	3	3	2	3	3	3	2	3	3	2	3	2	1	2
3	3	1	1	1	1	1	1	3	1	1	1	1	1	1	1	1	1	1	1
2	2	3	1	3	1	3	3	1	1	2	1	1	1	1	3	1	1	3	1
2	2	2	2	2	2	3	3	2	2	2	2	3	2	2	2	2	2	2	2
3	3	4	2	3	3	2	3	3	3	3	3	2	2	3	2	2	2	2	2
2	2	1	2	1	2	2	2	2	2	2	2	2	2	2	2	2	2	2	2
2	1	2	1	2	1	2	2	2	2	2	2	3	1	3	2	2	1	2	2
1	2	2	2	2	1	3	2	2	2	1	1	3	1	3	2	2	1	2	2
2	3	2	2	2	2	2	2	1	1	1	1	1	1	1	1	1	1	1	1
2	1	2	2	3	1	1	1	2	2	2	1	3	1	1	1	2	2	2	2
3	2	2	3	3	2	3	2	3	2	2	2	3	2	3	2	2	1	2	1
2	1	1	1	3	1	1	1	1	1	1	1	3	1	1	1	2	1	2	1
2	1	1	1	3	1	1	1	2	1	1	1	4	1	1	2	3	2	4	1
2	2	2	1	2	2	2	2	2	2	2	2	1	1	1	1	1	1	1	2
2	1	1	1	3	1	2	3	2	1	2	1	1	1	2	1	3	2	2	1
3	1	2	1	1	1	1	1	1	2	2	1	2	1	1	2	1	2	2	2
1	1	1	1	4	1	1	1	2	1	1	1	4	1	1	1	2	1	2	1
2	2	3	3	3	2	3	4	4	2	2	2	2	2	2	2	2	2	2	2
1	1	1	1	1	1	1	1	1	1	1	1	1	1	1	1	1	1	1	1
1	2	3	3	2	1	2	1	3	2	3	4	4	2	1	2	3	3	3	1
1	1	2	2	2	2	2	3	2	1	1	1	2	2	2	1	2	1	2	1
2	2	2	2	2	2	2	2	2	2	2	2	2	2	2	2	2	2	2	2
1	1	1	1	1	1	1	1	1	1	1	1	1	1	1	1	1	2	2	1
4	2	3	3	2	1	1	2	2	1	1	1	1	1	3	1	2	1	1	2
2	1	2	1	2	1	2	2	3	3	3	2	3	1	2	2	1	2	1	3
3	3	3	3	2	2	3	2	2	4	3	2	2	2	1	3	1	2	2	2
2	2	2	2	2	2	2	2	3	2	2	2	3	2	2	2	2	2	2	2
2	1	1	1	4	1	1	2	3	1	1	1	4	1	1	2	4	1	3	1
1	1	1	1	3	1	1	1	3	1	1	1	1	1	1	1	1	1	3	1
2	1	1	1	4	1	1	2	3	1	1	1	4	1	1	2	4	1	3	1
2	2	2	2	2	2	2	2	2	2	2	2	2	2	2	3	2	2	2	2
1	1	1	1	3	1	3	3	3	2	2	2	3	1	1	2	1	2	2	2
2	1	2	1	4	1	3	2	3	1	3	1	4	1	2	1	3	1	2	3
3	1	1	3	1	1	1	1	2	1	1	1	3	1	3	3	1	3	3	4
3	2	2	1	3	2	2	2	3	2	1	1	4	1	1	1	2	2	2	1
3	1	1	1	2	1	1	1	2	1	1	1	2	1	1	1	2	1	2	2
3	1	1	1	4	1	2	2	4	1	1	1	4	1	1	2	4	1	3	2
3	2	2	2	2	1	2	2	2	2	2	1	2	1	1	2	1	2	3	2
2	1	2	2	3	2	1	1	1	2	1	1	4	1	1	3	2	2	4	2
2	2	2	2	2	2	1	2	3	2	2	3	3	1	3	1	1	2	2	1
2	2	3	2	2	2	3	3	4	4	2	2	1	3	4	4	2	1	1	2
2	1	1	1	3	1	2	1	2	2	1	1	4	1	2	1	4	2	3	1
3	3	3	1	1	1	2	3	2	2	1	1	4	1	2	1	3	2	1	2
2	1	1	1	3	1	1	3	3	1	1	1	3	1	1	2	3	2	2	2
3	2	2	2	2	2	2	2	2	2	2	1	2	1	2	1	3	3	1	2
2	1	2	1	3	4	2	1	4	2	2	3	4	1	4	4	4	1	4	1
1	1	1	1	2	1	2	3	2	1	1	1	4	2	2	1	1	1	2	1
2	1	2	1	2	1	2	2	1	2	2	1	1	1	1	1	1	1	1	3
2	1	1	1	1	1	1	1	1	1	1	1	3	1	1	3	2	2	3	1
2	1	2	1	1	1	3	3	2	1	2	1	3	1	3	3	3	3	2	2
1	1	1	1	4	1	1	1	3	1	1	1	4	1	2	1	3	1	2	1
3	1	1	1	2	1	1	1	2	2	1	1	3	1	1	1	2	1	4	1
2	2	2	1	3	1	1	1	4	2	1	1	4	1	1	2	4	1	3	1
2	3	2	2	2	2	2	3	1	1	2	2	3	2	3	2	1	2	1	2
2	1	1	2	3	2	3	2	3	2	1	1	4	1	2	1	4	1	3	1
2	1	2	1	3	2	2	3	3	2	2	1	2	1	1	3	1	2	3	1
2	1	1	2	3	1	2	3	1	1	3	2	3	2	1	3	2	2	3	1
2	2	1	2	2	2	3	3	2	3	3	3	3	3	3	3	2	2	2	2
3	3	3	4	1	2	2	3	1	2	1	1	1	2	1	1	1	1	1	1
3	3	3	2	4	3	3	2	1	4	1	2	1	3	1	3	3	3	1	3
3	2	4	3	1	1	2	4	3	2	2	2	3	2	1	1	2	2	2	2
1	1	4	1	2	1	2	1	3	1	1	1	4	1	1	1	3	2	2	1
1	1	2	1	3	1	2	1	4	1	1	1	4	1	1	1	1	1	4	2
4	2	2	2	3	1	2	2	1	2	2	2	3	2	2	3	3	2	2	1
2	2	1	1	3	1	1	2	3	1	2	1	4	1	2	2	3	2	3	1
3	2	3	4	3	3	1	2	2	3	2	3	2	3	1	2	3	1	4	2
2	1	3	1	2	2	4	3	2	1	1	1	1	1	1	1	2	1	1	1
1	1	1	1	1	1	1	1	1	1	1	1	1	1	1	1	1	1	1	1
2	1	1	1	1	1	1	3	2	1	2	1	1	1	1	2	1	1	3	2
1	1	1	1	3	1	1	1	2	1	1	1	4	1	1	2	3	1	3	1

## Sheet: Emotional Regulation Scale
3	2	3	4	3	2	2	3	5	3
7	7	7	7	7	7	7	7	7	7
2	1	1	2	1	3	3	3	3	3
3	2	2	3	3	3	3	2	2	2
3	3	3	3	4	3	4	4	4	4
1	3	4	1	1	1	1	1	1	1
1	1	3	3	3	3	2	4	5	1
4	4	4	4	4	4	4	4	4	4
4	4	4	4	3	2	4	4	3	4
7	7	3	1	7	7	3	4	4	4
3	6	4	4	4	4	4	4	4	4
3	4	4	4	4	4	4	4	4	4
1	1	7	7	6	6	6	6	6	7
3	3	3	7	7	7	1	7	7	3
1	1	3	1	1	1	1	1	1	1
1	3	3	6	3	6	5	6	4	3
1	2	4	2	2	3	3	3	3	3
2	5	1	1	1	2	1	1	1	1
4	2	2	1	1	2	3	2	1	2
1	1	1	1	1	1	1	1	1	1
7	6	3	4	5	4	6	4	4	2
5	5	5	5	5	5	4	5	5	5
5	6	4	4	4	4	4	3	4	4
5	5	5	5	5	5	4	6	6	6
4	5	5	5	6	6	6	6	6	6
5	6	6	5	2	5	7	3	6	6
4	4	4	4	4	4	4	4	4	4
3	6	5	5	6	6	6	4	5	6
4	4	4	4	4	4	4	4	4	4
4	4	4	4	4	4	4	4	4	4
1	1	1	1	1	1	1	1	1	1
1	1	1	1	1	1	1	1	1	1
3	3	3	3	3	3	3	3	3	3
3	3	2	3	3	3	3	3	3	3
5	5	5	5	6	6	6	5	6	6
4	5	4	4	5	4	4	4	5	6
3	5	2	2	2	6	5	6	6	6
3	3	3	3	3	3	3	3	3	3
4	4	4	4	4	4	4	4	5	4
1	5	4	5	5	3	5	3	6	4
6	7	4	6	3	6	6	3	4	4
5	5	5	5	6	5	5	5	5	5
5	3	3	1	5	1	5	1	1	7
6	6	6	6	6	6	6	6	6	6
1	1	1	1	1	1	1	1	2	2
4	4	4	4	4	4	4	4	4	4
2	2	2	2	2	3	4	2	2	2
3	6	1	1	6	6	1	6	6	6
2	2	3	2	3	5	3	2	3	3
4	1	1	5	6	6	6	4	6	4
1	4	4	4	4	4	4	4	5	4
6	3	4	6	1	4	5	3	3	1
2	4	1	5	5	5	6	3	5	4
4	4	4	4	4	4	4	4	4	4
2	6	2	6	6	6	2	2	6	2
6	5	5	6	6	5	5	6	6	6
1	1	1	1	1	6	6	5	5	5
7	7	7	7	7	7	7	7	7	7
7	7	7	7	7	7	7	7	7	7
4	4	2	2	4	4	4	4	4	5
4	4	4	4	4	4	4	4	4	4
2	3	4	4	4	4	4	4	4	2
4	4	4	4	4	4	4	4	4	4
2	6	3	5	6	5	3	3	4	4
3	4	3	5	5	5	5	5	6	4
6	6	6	6	6	6	6	6	6	6
3	5	2	2	2	5	5	5	5	2
6	5	7	5	4	4	5	6	5	5
1	1	1	1	1	1	1	5	5	4
1	1	1	1	1	1	1	1	1	1
4	4	5	5	5	5	5	5	5	5
2	2	3	2	2	3	3	3	3	3
5	7	5	5	7	7	2	3	6	3
4	4	4	4	4	4	4	4	4	4
3	4	5	4	4	4	5	4	5	5
2	2	2	3	2	1	3	3	3	3
1	1	1	1	1	1	1	1	1	1
4	5	6	4	4	5	6	4	5	5
1	1	1	1	1	1	1	1	1	1
5	5	5	5	5	5	2	5	5	5
5	5	5	6	6	6	4	6	6	4
3	5	3	5	5	5	3	5	5	5
4	4	4	4	4	4	4	4	4	4
3	3	5	5	5	5	5	5	5	6
1	1	1	1	1	1	1	1	1	1
2	2	4	2	2	2	1	3	3	3
4	4	3	4	4	4	4	4	4	4
5	5	5	3	6	6	5	5	5	5
1	5	1	4	4	4	4	4	4	4
5	6	6	6	3	5	6	6	6	6
3	3	3	5	5	5	5	5	5	2
3	5	3	5	6	6	2	5	6	1
4	4	4	4	4	4	4	4	4	4
4	6	5	6	6	6	6	6	6	5
4	5	5	4	4	4	5	4	5	4
4	4	4	4	4	4	4	4	4	4
2	4	3	3	2	3	5	4	4	3
3	4	1	6	3	5	3	6	2	4
5	5	6	5	4	5	3	4	5	4
5	5	5	6	6	6	6	6	6	6
4	4	4	4	4	4	4	4	4	4
3	3	3	3	3	3	3	3	3	3
1	1	1	1	4	4	4	4	4	4
4	4	3	4	4	4	4	5	5	5
4	5	3	4	4	4	3	4	4	4
2	2	3	5	5	6	2	2	2	2
4	3	3	5	3	4	4	4	4	3
2	5	2	6	6	6	2	6	6	2
2	5	6	5	5	6	4	5	4	3
1	2	2	5	4	3	3	5	4	3
1	4	4	4	4	4	4	4	4	4
4	5	3	5	5	5	2	4	5	4
6	6	6	6	6	6	6	6	6	5
7	7	3	3	5	5	7	6	6	7
3	6	3	5	5	5	3	5	2	4
3	4	3	3	3	3	3	3	3	3
7	5	5	5	5	7	3	5	3	3
6	6	6	6	4	5	6	5	6	6
4	3	6	4	6	6	5	3	4	4
7	4	4	4	5	5	5	5	3	4
3	3	5	4	3	5	5	5	5	5
5	4	2	6	6	5	5	5	5	4
1	4	1	4	4	4	1	4	6	1
6	5	1	4	4	4	5	3	1	5
2	2	1	3	3	3	2	3	3	2
5	4	5	5	5	5	5	4	4	4
3	4	2	5	6	5	7	4	6	5
5	4	5	4	5	4	3	4	5	3
1	5	3	5	6	6	2	6	6	2
2	5	2	5	5	5	5	5	5	4
1	3	1	2	6	7	3	6	5	3
5	5	5	5	3	6	5	5	3	6
2	6	2	6	6	7	5	6	6	3
3	5	4	4	5	5	4	5	4	4
5	6	5	6	6	6	4	6	6	5
3	6	3	6	3	6	6	6	6	2
2	5	5	5	5	2	1	5	5	2
2	5	5	5	6	6	6	6	6	4
3	5	3	3	3	3	3	3	3	3
4	5	5	5	5	5	3	5	5	5
4	4	4	4	6	6	4	5	4	4
4	4	4	4	5	5	4	5	5	3
2	6	2	6	6	6	6	6	6	6
3	6	2	5	5	6	1	6	4	2
5	5	5	5	5	5	2	5	5	1
1	5	1	6	6	6	2	6	6	6
2	6	2	6	6	6	2	5	6	2
2	5	3	6	7	7	2	7	7	2
1	7	1	7	7	7	1	7	5	7
2	2	3	1	2	4	4	4	4	4
2	6	3	5	6	2	2	6	4	5
4	3	3	5	4	4	5	5	3	2
1	1	4	4	4	4	4	4	4	4
4	4	4	4	4	4	4	4	4	4
2	2	2	2	2	2	2	2	2	2
2	2	3	2	4	4	4	5	3	4
4	4	4	4	4	4	4	4	4	4
2	2	2	2	2	2	2	2	2	2
2	1	4	3	3	3	4	5	5	5
1	1	1	1	1	7	1	1	7	1
1	1	1	1	1	1	1	1	1	1
1	1	2	5	5	4	4	6	2	3
4	4	5	3	4	4	4	5	5	4
1	1	4	5	4	4	4	4	4	4
3	5	2	4	6	6	1	6	6	3
3	5	4	5	5	5	5	5	5	5
5	6	4	4	5	5	5	5	5	5
3	3	3	3	3	5	4	3	3	3
3	5	3	5	3	5	3	3	3	3
5	5	5	5	5	5	4	5	5	4
3	3	4	4	4	4	4	4	4	4
2	4	4	4	6	6	1	4	6	1
4	3	4	4	4	4	4	4	4	4
1	5	2	4	4	4	6	4	4	4
4	6	6	6	6	6	4	6	6	4
5	6	6	6	6	5	6	6	6	7
1	1	1	1	5	3	3	5	5	4
5	4	4	4	4	6	4	6	6	4
1	4	1	4	4	4	4	4	5	1
2	4	5	4	5	2	4	4	4	4
3	5	3	5	5	5	3	5	5	3
2	5	2	5	5	5	1	5	5	4
4	4	4	4	4	4	4	4	4	4
4	4	4	4	4	4	4	4	4	4
6	5	2	4	6	6	4	4	4	3
3	6	3	6	3	2	2	6	6	4
4	6	4	6	6	6	4	6	4	4
2	5	2	5	5	6	2	6	6	2
2	6	6	4	4	4	4	4	4	4
3	5	5	5	6	6	3	5	6	5
1	6	1	6	6	6	1	1	1	1
4	7	6	6	6	3	5	6	5	5
2	1	1	3	6	2	5	4	7	1
2	6	2	5	6	5	4	5	5	6
4	4	4	4	4	4	4	4	4	4
1	6	5	5	5	5	5	4	6	2
3	3	1	7	5	5	5	5	5	5
4	4	3	4	4	4	4	4	4	4
2	1	2	3	6	5	3	4	5	3
2	2	5	4	4	4	5	4	4	3
4	4	4	4	4	4	4	4	4	4
4	4	4	4	4	4	4	4	4	4
4	4	4	4	4	4	4	4	4	4
4	4	4	4	4	4	4	4	4	4
1	1	1	7	4	7	1	7	7	7
1	1	2	7	4	4	2	2	5	4
3	4	3	4	4	4	5	3	5	4
1	6	1	1	6	6	2	6	6	2
5	6	2	6	6	6	3	6	6	4
1	5	1	5	4	1	1	1	4	1
3	5	3	5	5	5	4	3	5	4
2	6	2	6	5	6	3	5	5	4
2	5	4	4	4	4	5	4	3	3
4	5	3	5	5	5	3	5	5	3
1	1	5	7	6	6	5	5	5	5
2	5	2	5	5	5	2	5	5	2
2	1	2	1	2	1	2	4	4	4
3	5	3	6	6	6	3	6	6	3
5	5	5	5	5	5	5	5	6	5
3	5	3	5	4	4	4	3	5	4
4	3	3	3	5	5	5	5	2	3
4	5	5	5	5	5	5	5	5	6
4	7	7	6	6	6	6	7	7	7
2	5	3	6	6	6	5	6	6	3
4	4	5	5	5	4	5	4	4	5
3	5	3	5	5	5	3	5	5	3
3	4	2	3	3	2	2	5	5	3
2	5	4	5	2	6	3	5	3	5
3	5	5	6	6	6	4	6	6	4
1	1	1	1	1	1	1	1	1	1
3	4	2	5	5	5	2	4	4	4
4	4	4	4	4	4	4	4	4	4
5	5	4	4	5	4	5	5	5	5
4	4	4	4	4	4	4	4	4	4
3	7	3	5	5	5	3	5	7	4
5	5	5	5	5	5	5	5	5	5
5	1	3	5	6	3	3	2	4	2
1	5	1	4	4	4	1	4	5	1
3	7	6	7	7	7	6	6	7	7
3	5	5	6	5	6	3	5	5	5
5	6	2	7	6	6	4	6	6	6
5	6	3	5	5	5	4	5	6	4
4	5	1	5	3	5	3	5	3	5
1	1	1	1	1	1	1	1	1	1
2	1	1	1	2	4	3	2	1	1
1	1	1	1	1	1	1	1	1	1
3	3	3	3	3	3	3	3	3	3
1	7	3	7	3	3	3	3	3	3
1	1	1	1	1	1	1	1	1	1
1	1	2	2	2	2	2	2	2	2
3	1	3	3	3	3	3	3	3	4
5	3	3	6	6	6	6	6	2	2
3	2	2	2	3	3	2	2	2	2
4	3	3	4	4	5	4	4	3	3
1	1	1	4	3	3	5	3	3	2
3	7	7	6	6	6	6	6	6	6
2	5	3	4	5	4	4	3	6	4
4	5	4	4	3	5	5	4	4	4
3	5	7	1	1	1	1	1	1	1
5	5	5	5	5	5	5	5	5	5
4	6	4	6	6	6	4	6	6	5
1	4	4	4	4	4	4	4	4	4
1	6	2	6	6	6	2	6	6	1
5	4	2	4	6	4	6	4	6	4
2	6	2	6	6	6	2	6	5	2
6	6	7	4	3	4	4	5	5	6
3	3	5	5	6	3	4	5	5	1
3	2	2	2	2	2	2	1	4	5
5	5	5	4	4	4	4	4	4	4
6	6	2	6	6	6	4	6	6	4
4	6	2	7	7	7	3	5	6	3
2	6	2	6	4	6	4	4	5	4
3	5	1	5	6	5	3	5	5	3
4	4	5	4	4	5	4	4	4	4
5	5	5	5	5	5	5	5	5	5
1	5	2	5	5	5	2	5	5	3
2	2	2	6	3	6	1	3	6	2
7	7	6	6	6	6	6	6	6	6
2	4	2	5	3	4	3	3	5	3
4	3	4	2	5	6	3	5	5	4
5	6	2	6	6	6	4	6	6	5
2	6	1	6	6	6	2	6	6	4
5	5	3	5	4	4	2	4	5	3
2	5	2	6	6	5	3	5	6	4
3	5	5	5	5	5	5	4	5	5
1	5	2	6	6	6	2	5	5	3
4	6	2	5	3	3	2	3	7	3
2	5	2	4	5	4	4	4	4	4
3	6	6	5	5	5	4	4	6	4
2	7	3	5	6	6	3	6	6	3
5	6	3	5	5	5	3	4	5	5
5	6	4	7	7	4	1	6	6	4
7	7	7	6	5	3	3	7	7	4
2	7	6	3	4	4	3	4	3	3
4	4	3	5	3	4	4	2	4	3
4	4	4	4	4	4	5	4	4	6
4	4	4	4	4	4	4	4	4	4
2	4	3	3	2	6	4	4	5	5
3	2	2	5	5	5	2	6	6	2
1	1	1	6	2	5	1	2	5	1
2	2	2	6	6	6	6	6	6	6
6	6	5	5	5	5	1	5	5	3
4	5	6	5	5	5	6	5	6	5
2	6	5	6	6	6	6	6	5	6
1	6	1	7	6	6	1	6	6	3
5	7	1	4	5	6	4	4	4	3
1	7	2	6	7	6	2	5	7	1
1	5	1	1	6	6	1	1	6	1
6	6	5	6	6	6	6	4	6	4
5	6	5	2	2	2	5	2	6	6
4	5	5	5	3	5	5	6	3	3
6	4	6	4	5	5	7	4	4	5
1	1	1	7	2	7	1	2	7	2
3	6	2	6	6	6	2	6	6	2
2	6	2	6	6	6	2	6	6	2
6	5	5	5	4	4	4	3	4	3
6	5	2	4	6	2	2	6	3	1
1	5	1	5	6	6	1	1	5	5
2	6	5	6	6	7	5	6	6	3
4	4	4	4	4	4	4	4	4	4
4	4	4	4	4	4	4	4	4	4
3	3	3	3	3	3	3	3	3	3
4	4	4	5	5	4	4	4	4	3
5	5	5	5	5	5	5	5	5	5
3	3	2	3	3	3	3	2	2	3
2	3	2	3	4	3	3	3	3	3
3	3	3	3	3	3	3	3	3	3
2	5	4	5	5	5	5	5	5	5
3	4	5	5	5	5	3	5	5	5
5	4	3	3	4	4	4	3	6	2
4	5	3	5	6	6	5	6	5	3
6	7	2	6	7	7	3	2	1	1
5	5	3	4	5	5	6	5	6	5
6	6	6	6	5	6	6	6	6	6
3	3	4	3	6	6	4	5	5	3
3	5	5	5	6	6	4	5	6	4
3	5	4	6	6	6	3	6	4	4
4	4	3	3	5	5	4	5	5	4
5	5	4	4	4	4	4	3	3	4
7	7	7	5	5	7	7	7	7	7
4	5	5	5	5	5	5	5	5	5
4	4	4	3	4	4	6	6	7	3
3	3	6	6	6	6	4	4	4	6
6	1	2	3	6	3	6	7	5	2
5	5	3	7	6	7	1	7	7	3
6	6	6	4	5	4	6	4	4	4
3	3	2	6	5	5	1	3	3	3
3	5	3	5	4	4	4	4	5	3
1	3	2	4	4	4	3	4	3	3
3	5	4	5	6	5	4	5	5	4
2	6	2	6	6	6	2	6	6	3
3	5	2	6	5	5	5	5	5	6
5	5	5	5	3	5	5	3	3	3
6	5	6	5	5	4	5	4	5	3
3	6	3	6	6	6	3	6	6	6
5	6	3	6	3	6	4	5	5	4
2	4	2	4	4	4	5	4	4	3
1	5	6	6	6	7	4	4	4	4
3	4	3	4	5	4	6	6	3	6
5	6	2	5	5	5	4	3	3	7
2	1	1	1	3	3	3	2	2	3
1	5	5	5	5	5	5	5	5	5
2	2	5	3	3	3	3	6	6	6
2	2	2	2	2	2	2	2	2	2
4	4	4	4	4	4	4	4	4	4
6	3	6	5	2	4	6	5	5	4
1	3	2	2	3	2	2	2	2	2
3	4	4	4	4	4	4	4	4	4
4	4	2	4	4	4	5	4	4	4
4	4	4	4	4	4	4	4	4	4
4	5	3	5	5	5	3	5	5	4
3	6	5	5	5	5	5	5	5	2
4	4	4	4	4	4	4	4	4	4
4	4	1	4	7	4	4	4	4	4
1	1	1	1	1	1	1	1	1	1
1	7	5	7	7	7	7	7	7	7
3	5	4	5	5	2	4	5	5	5
3	3	3	3	3	3	4	4	4	4
3	5	3	5	6	6	3	5	5	5
3	5	4	5	5	5	2	6	6	3
2	3	3	3	5	2	3	2	4	4
6	6	4	6	6	6	6	6	6	6
2	6	1	6	1	7	6	1	7	7
4	4	4	4	4	4	4	4	4	4
4	4	4	4	4	4	3	3	4	4
4	5	4	5	5	5	4	5	5	5
3	6	3	6	6	6	2	6	6	3
4	6	4	6	6	6	2	4	6	4
3	5	4	4	5	5	3	5	5	5
4	5	6	5	6	5	3	5	5	5
4	6	4	5	5	5	5	5	6	3
6	4	5	6	5	5	3	3	5	3
3	4	4	4	5	5	4	4	4	4
1	1	1	1	1	1	2	1	1	1
1	6	1	1	6	1	1	6	7	3
2	6	2	6	6	6	5	6	6	5
5	6	1	6	7	7	1	1	7	1
1	3	3	2	2	4	4	2	5	3
4	5	5	5	5	4	2	5	5	2
4	4	4	4	4	4	4	4	4	4
3	5	2	6	6	6	4	6	6	4
2	6	2	6	6	6	5	6	6	5
2	6	3	6	6	6	2	6	6	6
4	4	4	4	4	4	4	4	4	4
5	6	4	4	4	4	4	4	5	5
4	6	4	4	4	6	5	3	3	3
3	6	3	6	6	7	3	5	7	2
2	6	3	5	5	5	2	6	5	2
1	2	2	1	2	4	2	4	4	2
4	5	4	4	4	4	4	4	4	4
7	7	7	7	7	7	7	7	7	7
3	2	6	6	5	3	4	6	5	1
3	6	2	5	5	5	2	4	5	3
4	4	5	3	4	4	4	3	4	4
3	5	2	5	6	6	1	5	6	2
5	5	5	5	5	3	5	5	5	5
4	6	4	6	5	6	7	7	7	7
2	4	3	5	5	5	3	3	5	2
3	5	2	6	5	5	2	2	5	2
3	5	3	5	5	3	2	3	5	2
4	6	5	5	6	6	3	6	6	4
5	6	4	6	7	7	1	7	7	4
4	5	3	5	5	5	3	5	6	3
3	4	2	6	6	6	4	4	4	4
3	5	4	5	4	5	3	5	5	3
5	4	5	2	4	4	5	4	4	4
2	6	2	6	6	6	2	6	6	2
7	6	6	7	5	7	7	6	6	7
7	7	5	5	5	5	5	5	5	5
4	5	4	5	5	5	5	5	6	4
4	5	3	4	1	4	5	2	4	5
4	6	4	5	6	5	4	6	6	4
5	3	4	5	5	5	4	5	5	5
3	5	2	6	5	5	5	5	6	2
5	5	4	6	5	5	4	4	5	4
5	5	4	4	4	5	5	5	6	3
3	5	3	5	5	5	5	5	5	4
2	5	2	5	6	5	3	5	6	2
2	6	3	6	6	6	2	6	6	2
3	5	5	5	5	5	2	5	5	5
1	5	2	4	6	6	6	4	4	2
4	4	4	4	4	4	4	4	4	4
3	5	3	5	5	6	6	6	5	3
2	1	2	2	5	6	2	6	6	5
1	6	2	5	4	6	6	5	4	5
3	5	2	5	6	6	6	5	5	2
2	3	4	4	2	5	2	5	5	4
5	5	5	5	5	5	5	5	5	5
3	7	2	4	6	6	2	6	6	4
6	5	6	4	5	4	6	6	6	6
4	4	3	4	4	4	4	4	4	4
2	4	3	4	4	4	4	4	4	4
5	4	2	5	5	5	4	4	4	4
6	5	5	3	3	5	3	3	3	3
6	6	2	7	7	7	2	7	7	6
2	4	2	4	4	4	2	4	4	4
2	6	2	6	6	6	2	6	7	1
2	5	1	5	5	5	3	5	5	1
1	7	7	7	6	7	7	6	6	6
1	4	5	5	5	5	4	5	5	4
1	7	2	6	7	7	3	7	7	3
2	6	5	6	6	6	5	6	5	5
4	5	4	4	4	4	4	4	5	5
2	4	3	4	3	5	2	4	5	3
5	5	5	6	4	6	5	5	5	4
1	3	3	2	5	5	5	5	5	5
1	1	1	4	4	4	4	4	4	4
4	4	4	4	4	4	4	5	5	4
2	3	3	2	2	2	3	3	3	3
3	6	3	6	5	5	3	5	5	5
1	5	3	5	3	3	2	5	5	3
3	3	3	4	4	3	4	3	3	4
3	5	2	6	6	6	4	5	6	3
1	4	2	5	4	4	3	4	4	3
4	6	2	5	6	5	4	6	6	4
3	6	2	6	6	6	2	6	5	2
4	6	5	7	7	7	5	7	7	5
2	7	5	6	3	3	2	3	6	3
7	7	7	7	7	7	7	7	7	7
2	3	3	3	4	4	4	4	4	4
1	2	2	2	2	2	3	2	4	3
2	6	5	6	6	5	4	6	6	3
3	5	3	4	4	2	6	5	5	5
2	3	4	4	5	5	6	5	4	3
2	6	1	6	6	6	2	6	6	2
2	1	3	1	1	1	1	5	5	4
4	5	3	6	6	6	6	6	3	4
5	3	6	4	3	4	6	3	3	6
2	2	3	2	2	2	2	2	6	3
3	1	6	1	7	7	7	4	7	7
5	5	5	5	4	5	5	3	3	3
3	5	4	5	4	3	3	5	5	4
1	5	1	7	6	6	1	7	7	3
5	5	3	4	3	2	1	1	4	2
5	3	2	6	6	6	6	6	6	2
5	3	3	4	4	3	4	5	5	5
3	3	3	3	3	3	3	5	3	3
1	1	1	1	1	1	1	1	1	1
2	1	1	2	3	4	2	5	1	6
4	4	4	4	4	4	4	2	2	2
2	5	1	5	5	5	1	5	5	3
1	1	1	1	1	1	1	7	7	7
3	3	3	3	3	3	3	3	3	3
4	4	4	4	4	5	2	5	4	5
4	6	4	6	6	6	4	4	6	4
2	2	4	4	6	1	5	4	4	4
4	2	2	5	5	5	4	5	4	4
1	7	1	1	1	1	1	1	1	1
4	4	4	4	4	4	4	4	4	4
3	6	2	6	6	6	6	6	6	3
4	5	3	5	5	5	4	5	5	3
2	5	3	6	6	5	2	6	6	2
3	3	3	3	3	3	3	3	3	3
4	4	4	4	4	4	4	4	4	4
1	7	4	6	7	7	4	5	5	6
6	6	3	5	5	6	6	5	5	6
3	5	3	4	5	5	5	5	5	3
4	5	3	4	4	4	4	4	3	3
5	6	5	6	6	6	5	4	2	3
3	7	5	7	5	5	3	6	7	3
4	3	3	5	6	3	2	5	5	5
7	7	2	2	7	4	5	3	2	3
2	2	2	2	2	3	2	2	3	2
1	1	1	1	1	1	1	1	1	1
2	1	3	3	5	3	2	1	2	3
1	1	1	1	1	1	1	1	1	1
4	5	5	5	1	1	5	5	5	5
1	1	1	1	1	1	1	1	1	1
3	1	3	4	3	2	3	3	3	3
1	1	1	1	1	1	1	1	1	1
2	1	2	6	3	3	5	6	3	5
2	6	2	7	6	6	3	6	6	3
4	4	4	4	4	4	4	4	4	4
6	6	2	4	2	4	4	4	4	4
4	4	4	4	4	5	4	4	4	4
2	6	2	6	6	6	2	6	6	3
1	1	1	5	5	7	7	7	7	7
3	5	4	5	5	5	5	5	5	4
4	4	4	4	4	4	4	4	4	4
6	6	4	5	6	6	4	6	6	6
6	6	2	6	6	6	2	6	6	4
5	4	2	5	5	5	7	5	5	7
3	5	3	6	6	6	2	6	6	3
1	6	3	1	1	1	6	7	7	3
5	5	6	5	5	5	5	5	5	5
2	4	2	6	6	6	2	4	4	4
2	2	3	5	5	5	6	5	3	2
4	4	4	4	4	4	4	4	4	4
2	6	3	6	6	2	2	6	6	3
2	6	2	6	6	6	2	6	6	2
5	6	6	6	6	6	6	6	6	6
3	6	4	6	6	4	3	6	6	3
3	5	3	3	3	3	3	5	3	3
5	5	5	5	4	6	3	6	6	5
3	6	1	5	6	5	5	6	6	6
1	6	5	6	5	7	2	7	6	3
2	4	2	5	5	5	5	5	5	4
2	6	2	6	6	6	4	6	6	4
5	5	7	1	1	1	5	1	1	3
5	5	5	5	6	5	5	5	5	5
3	5	3	6	6	6	2	6	7	6
4	5	4	4	4	4	5	4	4	5
5	6	2	6	6	2	2	4	2	2
2	6	4	5	5	5	3	4	6	4
6	6	6	6	6	6	6	6	6	6
1	1	1	1	1	1	1	1	1	1
3	5	5	6	6	5	6	6	6	2
2	2	2	4	4	4	4	4	4	4
7	7	7	7	7	7	7	7	7	7
7	7	7	7	6	6	7	6	5	7
5	5	3	5	5	5	5	5	3	3
3	6	2	6	6	2	2	6	6	2
6	2	2	4	6	6	2	6	5	2
4	2	2	3	3	3	3	4	4	4
4	4	3	4	4	3	4	4	4	3
5	6	6	6	6	5	6	6	6	7
5	5	5	6	6	6	7	6	6	6
4	4	3	3	4	4	4	4	3	4
4	4	4	4	4	4	4	4	4	4
1	1	1	1	1	1	1	4	4	4
7	7	1	7	7	7	5	7	6	7
3	3	3	3	3	3	3	3	3	3
6	6	6	6	6	5	6	6	6	6
3	3	5	5	5	5	5	5	5	5
2	5	6	5	4	6	3	5	5	3
4	6	4	6	6	6	5	5	4	5
1	6	2	6	6	7	3	6	5	2
1	2	5	5	6	6	4	4	4	5
2	2	3	4	4	4	4	4	4	4
5	5	3	5	6	6	5	6	6	3
1	7	1	7	7	7	1	7	7	7
3	4	3	3	3	3	3	3	3	3
6	6	6	5	4	4	7	4	6	6
4	5	3	4	4	4	4	4	4	4
1	4	4	4	4	4	4	4	4	4
5	3	5	4	2	3	1	1	4	5
1	6	1	5	5	5	1	4	6	2
4	4	2	5	4	5	6	6	6	6
5	5	3	5	5	5	5	5	5	6
3	4	2	5	6	6	2	6	6	4
3	3	2	3	3	6	2	4	3	3
4	4	4	6	6	6	4	4	4	5
4	4	4	4	4	4	4	4	4	4
1	7	4	7	7	7	6	7	7	5
1	1	1	2	5	5	3	5	4	4
2	6	5	6	5	6	6	7	7	3
2	5	2	5	6	6	1	5	6	1
3	5	3	4	5	5	4	5	4	4
4	4	4	4	4	4	4	4	4	4
1	6	5	5	5	3	4	5	5	5
1	6	1	6	6	1	1	6	6	1
3	6	3	5	6	6	4	6	6	2
1	1	1	1	1	3	1	1	2	2
4	4	3	4	5	4	3	5	6	4
2	3	3	3	3	3	3	3	3	3
3	3	3	3	3	3	3	3	3	3
3	5	4	5	6	6	3	5	6	4
1	6	2	6	6	6	6	6	6	3
3	5	5	6	6	6	3	6	6	7
5	6	4	5	6	6	7	6	6	5
6	6	5	6	6	5	2	6	6	6
3	5	5	5	3	5	5	3	5	5
2	2	4	4	5	5	4	4	4	3
1	1	1	2	1	1	1	1	1	1
4	4	4	4	4	4	4	4	4	4
1	1	1	1	1	1	1	1	1	1
4	4	4	4	3	3	3	3	3	3
2	2	3	2	3	3	3	3	4	4
3	4	4	4	4	4	3	4	4	4
3	3	3	3	3	3	3	3	3	3
2	4	4	4	4	4	4	4	4	4
6	2	6	2	3	3	5	4	4	4
1	1	1	1	1	5	5	3	3	3
5	4	5	4	4	4	5	4	4	7
5	6	5	5	6	5	4	5	6	4
4	4	4	4	4	5	5	6	4	4
5	5	5	5	5	5	7	5	5	4
6	6	6	6	6	6	5	5	4	5
1	6	4	6	5	5	3	6	6	3
3	3	3	3	3	3	3	3	3	3
2	5	3	3	3	6	6	6	5	3
4	2	5	3	4	4	5	2	4	5
3	1	1	7	7	7	1	6	7	1
1	6	2	6	4	6	6	2	6	2
2	6	3	5	6	6	2	2	6	3
5	5	2	5	6	3	2	1	5	3
6	6	6	6	6	6	6	6	6	6
1	2	5	1	2	2	3	1	7	5
4	5	5	5	5	5	5	5	5	5
4	5	3	3	3	6	3	5	5	3
2	5	5	6	6	6	3	5	5	4
4	5	5	6	6	7	5	5	5	3
6	6	5	6	6	6	6	5	5	5
3	6	3	5	6	6	6	6	6	4
2	2	5	4	3	4	5	5	6	7
3	5	3	5	5	6	1	7	7	1
5	6	6	6	6	6	7	6	6	4
7	7	4	6	6	6	2	7	7	4
1	1	3	1	1	1	3	2	2	4
7	4	4	5	5	7	5	6	6	5
2	5	3	5	5	3	3	5	6	2
6	6	4	6	6	6	4	5	5	4
2	5	5	5	5	5	2	5	5	2
2	2	2	3	2	2	2	2	2	2
2	5	1	4	4	4	4	4	4	4
2	6	2	6	6	6	4	6	4	4
4	5	4	5	4	5	4	4	5	4
6	6	7	7	6	5	7	1	6	6
4	4	4	4	4	4	4	5	5	5
4	5	3	5	4	4	3	4	4	3
1	6	1	6	6	6	1	6	6	2
4	5	2	4	4	4	4	4	4	2
2	6	3	6	6	6	3	6	6	2
3	5	2	4	6	3	3	5	6	3
6	6	5	6	6	5	4	5	6	3
1	5	2	2	3	4	1	6	4	1
5	5	5	5	5	5	5	5	5	5
4	6	3	5	5	5	3	5	5	1
1	1	1	1	5	6	6	7	5	2
1	5	1	5	5	1	1	5	3	2
3	6	4	5	5	5	7	5	5	5
2	6	3	6	6	6	4	6	6	3
3	5	4	5	6	6	2	6	6	6
1	5	2	5	5	5	1	4	4	4
1	6	2	1	6	2	4	6	6	2
2	5	4	5	5	4	2	3	6	3
5	5	4	5	5	5	4	5	5	4
2	6	2	6	6	6	6	6	6	4
3	5	2	6	6	6	2	6	6	3
5	3	5	5	5	5	4	2	4	6
5	4	5	5	5	5	5	5	5	4
4	4	3	4	3	4	5	5	6	2
4	5	3	6	6	7	2	6	6	2
2	4	2	4	4	4	2	2	2	1
5	5	5	5	5	5	2	5	5	5
1	5	1	6	6	5	5	1	7	4
2	4	2	4	5	5	2	4	5	3
5	5	3	5	5	5	2	5	4	5
3	4	5	5	5	4	5	4	4	3
2	6	5	6	6	6	6	6	6	6
3	4	4	4	4	4	4	4	4	4
3	3	3	3	3	3	3	3	3	3
3	4	3	4	5	5	3	4	4	4
5	5	5	5	3	5	5	5	5	5
3	3	2	7	6	5	5	5	5	5
4	4	4	4	4	4	4	4	4	4
1	4	3	4	4	4	2	4	4	4
4	5	3	3	4	4	4	6	6	3
4	4	4	4	4	4	4	4	4	4
4	4	4	4	4	4	4	4	4	4
7	5	3	3	3	5	5	3	2	2
4	4	4	4	4	4	4	4	4	4
5	5	5	5	5	5	4	5	5	5
7	7	7	7	7	7	7	7	7	7
2	2	6	6	6	6	2	6	6	4
5	4	2	5	4	4	5	4	6	7
1	5	1	6	6	5	1	7	7	7
4	4	5	4	4	4	4	4	5	4
2	5	2	5	5	5	2	5	5	2
1	5	3	5	5	5	1	6	6	2
4	5	3	5	6	6	3	4	5	3
3	5	2	4	4	3	2	4	4	2
4	5	3	5	6	6	2	6	6	4
5	5	4	4	4	4	4	4	4	4
5	5	3	5	5	5	3	5	4	3
3	5	3	5	5	5	5	4	6	3
3	7	4	6	6	6	3	4	7	5
5	5	4	4	5	5	3	5	5	3
5	6	5	6	4	4	5	4	5	5
5	5	3	5	5	5	3	5	6	3
2	2	2	2	2	2	2	2	2	2
1	1	1	6	6	6	2	6	6	2
1	4	4	6	2	4	4	5	5	4
4	5	4	4	3	3	5	4	4	4
3	6	3	5	5	3	3	5	5	3
1	7	1	7	7	7	1	7	7	1
2	4	2	5	5	5	2	2	6	4
2	4	2	4	5	2	2	5	4	2
5	5	5	3	3	3	6	3	3	5
1	6	2	1	7	1	6	6	6	3
1	4	1	4	4	4	4	4	4	1
2	6	5	5	5	5	5	5	5	5
4	4	3	4	4	4	4	4	4	4
1	5	2	6	5	5	1	3	2	2
5	6	3	3	5	5	5	5	5	3
6	6	5	6	4	4	6	6	5	4
2	2	2	2	3	4	4	4	4	4
3	3	3	3	3	2	3	3	3	4
2	6	4	6	6	6	6	4	6	7
3	5	6	6	6	5	7	6	4	7
3	4	4	6	6	6	4	4	6	6
3	5	3	5	4	4	5	4	5	3
2	6	1	6	6	6	6	6	6	4
4	5	3	5	4	4	3	4	5	2
7	5	4	6	5	5	1	5	5	1
2	3	1	5	6	6	2	6	6	6
2	2	3	5	5	6	4	4	5	3
1	1	1	1	1	1	1	1	1	1
3	5	3	5	5	5	1	5	5	1
4	4	4	4	4	4	4	4	4	4
3	5	2	5	5	5	5	5	5	3
4	5	3	4	4	4	5	4	4	4
1	4	4	4	4	4	4	4	4	4
5	5	4	5	5	5	5	5	5	4
1	1	1	5	5	5	1	5	5	1
4	5	4	4	5	6	4	4	4	5
5	5	3	5	5	5	5	6	5	3
2	5	5	5	5	5	4	4	4	4
3	3	2	2	2	2	3	3	3	3
5	1	1	1	2	1	5	1	1	1
1	3	3	3	3	3	3	3	3	3
4	4	4	4	4	4	4	4	4	4
2	2	2	2	3	3	3	3	3	3
2	2	3	2	2	3	4	3	5	4
4	3	3	5	4	6	3	2	2	4
5	5	5	5	5	5	5	5	5	5
5	5	6	6	6	6	4	6	6	6
3	4	4	4	4	4	4	4	4	4
7	7	7	7	7	7	7	7	7	7
5	4	5	5	4	4	4	4	4	4
5	5	6	5	5	5	6	5	5	6
1	1	5	3	2	2	2	4	5	5
4	5	5	5	4	5	6	6	6	5
1	5	2	7	7	7	2	7	7	4
4	4	3	3	4	4	4	4	4	4
1	3	1	5	6	6	1	4	5	1
2	6	2	6	6	6	6	6	6	7
5	5	6	5	6	4	4	3	5	5
5	5	5	5	4	6	4	4	6	4
4	4	3	4	5	5	5	5	4	4
5	5	5	5	5	5	3	5	5	3
2	6	2	5	6	5	5	5	5	3
5	5	3	5	5	5	2	5	5	5
5	4	4	4	4	4	4	4	4	4
3	4	2	4	5	5	3	5	6	2
3	5	5	6	7	6	6	6	6	4
7	7	7	7	7	7	7	5	5	7
5	5	5	5	5	5	5	5	5	5
4	4	4	4	4	4	4	4	4	4
2	1	1	1	1	1	1	1	1	1
3	5	3	3	3	2	3	4	4	2
2	6	3	5	5	6	4	5	7	3
2	7	6	7	7	7	6	7	6	1
4	5	5	6	6	6	6	6	7	7
5	6	2	6	5	5	1	6	5	4
7	6	5	4	1	4	7	1	4	7
6	6	1	5	6	6	2	6	5	2
4	5	5	6	4	4	4	5	4	6
1	4	1	4	1	7	7	3	4	4
5	6	6	6	6	4	6	4	4	6
3	3	1	1	3	7	6	3	3	5
2	4	2	4	4	4	4	4	5	2
1	5	5	4	4	4	5	6	6	3
3	7	6	7	7	7	2	6	6	4
5	5	5	5	5	5	5	5	5	5
3	6	5	6	6	6	5	6	5	5
5	5	6	5	5	4	5	5	4	6
2	4	2	4	4	4	2	4	5	5
4	3	1	5	6	6	5	6	6	6
4	2	1	1	2	2	4	5	4	3
4	4	4	4	4	4	4	4	4	4
1	7	7	7	7	7	7	7	7	1
4	4	4	4	4	4	4	4	4	4
7	7	7	7	7	7	7	7	7	7
4	5	4	4	4	4	4	4	4	4
1	1	1	7	7	7	1	7	7	1
4	4	4	4	4	4	4	4	4	4
1	7	1	7	7	7	1	7	7	1
4	4	4	4	4	4	4	4	4	4
3	4	4	4	4	4	4	4	4	4
1	1	1	1	1	1	1	1	2	1
3	3	3	3	3	3	3	3	3	3
4	4	4	4	4	4	4	4	4	4
1	1	1	1	1	1	1	1	1	1
4	4	4	4	4	4	4	5	5	4
1	7	1	7	7	7	1	7	7	3
1	4	3	5	5	5	5	5	5	6
2	6	3	6	6	6	2	6	6	3
7	7	1	7	1	1	1	1	4	4
1	4	1	5	1	5	1	5	5	1
4	4	3	4	4	4	4	3	3	4
2	5	3	4	4	5	4	4	4	4
4	4	7	4	6	4	7	2	6	7
3	2	3	4	4	5	5	5	5	5
2	2	2	2	4	4	2	2	4	2
3	3	3	6	5	6	3	6	6	4
2	6	4	6	6	4	4	4	5	2
2	6	5	6	6	6	5	6	6	4
2	2	2	2	2	2	2	2	2	2
1	1	1	1	1	1	1	1	1	1
4	4	5	4	4	7	2	4	6	6
4	4	4	4	4	4	4	4	4	4
3	3	5	4	5	4	6	5	5	5
5	6	5	3	5	6	5	5	2	4
5	4	3	4	4	4	3	4	5	4
2	4	2	4	6	6	3	5	5	5
2	2	1	2	2	5	3	5	3	1
4	4	4	4	4	4	4	4	4	4
5	7	5	5	3	6	6	5	1	2
4	5	1	6	6	6	5	5	6	3
5	4	2	6	5	4	4	6	7	2
4	5	4	4	4	4	4	5	6	5
2	5	5	6	4	5	6	6	5	5
2	4	6	4	4	4	5	4	4	5
1	7	1	7	7	7	1	5	5	1
1	3	2	3	4	2	3	4	5	3
4	4	4	4	4	4	4	4	4	4
2	2	5	4	1	4	5	4	3	3
2	3	1	1	1	1	1	1	7	7
5	5	3	6	6	6	2	6	5	2
4	6	4	6	6	4	4	6	6	5
2	6	6	6	6	7	4	6	7	5
3	5	3	1	3	6	5	5	5	2
6	6	5	6	6	6	5	6	6	4
3	5	2	5	5	5	3	5	5	3
1	1	1	4	4	7	4	4	4	4
3	5	4	5	4	4	3	3	3	2
2	6	1	6	4	5	2	2	4	4
3	4	4	4	4	4	4	4	4	4
2	5	2	6	5	5	5	4	5	4
4	5	5	5	5	3	5	6	6	6
4	5	3	4	3	3	4	4	3	6
3	4	5	4	4	4	3	4	5	4
3	3	2	5	4	5	6	6	6	6
4	5	5	4	4	5	6	4	5	5
1	5	2	5	6	5	2	6	6	2
5	5	2	5	6	6	2	5	6	1
5	3	5	4	5	2	3	4	4	3
3	6	5	6	6	6	6	6	6	5
4	4	2	2	4	4	4	4	4	4
2	6	4	4	4	4	4	4	4	4
1	4	3	4	4	5	2	4	4	4
2	5	2	5	5	5	2	5	3	2
2	6	2	6	6	6	2	6	6	2
2	1	2	3	5	2	5	5	4	4
2	6	2	2	6	4	2	6	6	2
4	4	3	5	4	5	5	5	5	3
3	2	2	3	4	3	3	2	5	5
5	6	5	4	6	7	2	4	5	7
3	3	6	1	2	2	3	4	7	5
3	3	3	4	4	4	3	5	3	3
4	4	4	4	4	4	4	4	4	4
3	5	5	5	3	3	3	3	3	3
4	5	5	4	5	4	4	4	5	4
4	4	4	4	4	3	6	5	6	4
4	5	2	6	6	5	2	2	2	5
2	3	5	4	3	5	6	3	5	6
5	6	2	3	3	5	4	4	5	5
6	6	6	6	6	4	5	4	4	5
7	6	6	6	6	6	6	6	6	6
5	6	5	5	5	4	3	1	6	6
5	6	2	5	3	5	4	4	4	4
4	6	2	6	6	6	2	6	6	6
6	6	4	5	4	4	6	4	4	5
5	5	3	5	5	5	5	5	5	3
4	4	4	4	4	4	2	5	4	4
5	3	6	4	5	5	5	4	4	2
4	4	5	5	3	4	3	5	5	4
6	6	3	6	6	4	2	5	5	2
3	5	1	2	3	7	4	7	7	6
3	2	2	2	3	2	3	4	5	4
2	5	2	2	3	3	5	5	4	3
3	6	2	4	4	4	4	4	4	4
2	3	3	2	3	2	4	5	4	4
3	3	3	3	2	6	5	3	2	4
6	4	6	5	5	5	3	6	5	3
2	4	3	6	6	6	6	6	6	2
1	7	2	7	7	7	2	6	6	4
5	4	3	5	5	5	2	5	4	3
5	5	2	2	5	5	2	5	4	2
2	5	1	6	6	6	2	6	6	3
3	5	2	4	3	3	2	3	5	2
6	6	6	6	6	6	6	6	6	6
3	5	3	5	6	5	5	6	6	3
2	5	5	5	6	5	1	4	5	5
7	5	7	4	4	4	7	3	6	7
5	5	4	5	4	4	5	5	5	4
2	6	2	6	6	2	2	6	6	5
2	5	6	7	6	5	5	6	7	4
3	4	2	5	5	5	2	5	5	2
3	5	3	3	5	6	3	5	6	5
2	4	4	5	4	2	3	2	5	4
3	5	7	5	5	5	6	5	3	3
3	3	4	3	4	3	2	2	5	1
1	1	1	1	1	1	1	1	1	1
3	3	3	5	5	5	4	5	5	3
4	3	4	4	3	1	2	2	5	4
4	3	5	5	6	6	1	6	5	2
2	3	6	6	2	4	6	5	5	3
4	4	4	4	4	4	4	4	4	4
1	5	5	4	4	6	1	7	6	6
1	4	3	2	2	2	3	3	3	2
1	3	5	4	2	6	3	3	3	5
3	5	5	6	5	6	1	5	5	3
1	4	4	7	7	7	5	7	7	7
2	3	3	5	3	3	3	3	3	2
3	5	5	5	5	4	5	5	4	5
2	4	3	4	5	5	5	4	4	4
6	2	3	2	3	2	1	2	1	4
4	4	1	4	4	4	1	4	4	2
5	3	6	6	6	3	6	7	3	2
4	4	5	4	4	4	5	4	4	4
1	1	1	1	1	1	1	5	4	4
5	5	3	5	4	5	5	5	5	5
2	3	2	5	3	3	2	2	3	3
3	4	4	4	4	2	5	5	3	2
4	4	4	4	5	4	4	4	7	1
4	5	4	4	5	4	5	5	4	4
3	6	2	6	3	5	5	6	5	3
1	1	1	2	2	2	2	2	2	2
3	5	3	5	5	6	4	6	6	4
3	3	3	2	3	3	2	3	5	5
3	4	1	5	5	5	3	3	3	3
4	6	3	5	6	6	2	6	6	5
5	5	6	5	5	5	5	5	5	5
4	4	5	5	5	4	4	4	4	4
2	2	1	7	5	5	7	6	6	7
2	5	2	4	4	2	2	4	5	6
2	4	3	3	2	2	2	2	2	2
2	2	1	6	6	6	6	6	6	4
5	3	2	4	4	4	5	5	4	2
4	4	6	5	4	5	5	4	5	4
4	3	3	3	3	3	3	3	3	3
3	5	2	5	5	5	2	5	5	3
1	6	2	5	5	6	3	4	6	4
5	6	7	6	6	7	5	6	6	2
6	5	6	4	5	5	6	5	5	6
4	4	4	4	4	4	4	4	4	4
3	4	3	5	4	4	4	4	4	4
7	7	6	4	4	4	4	4	4	4
2	3	3	5	3	4	4	3	4	4
3	3	5	5	5	5	5	5	5	5
6	6	6	6	6	6	6	6	6	3
2	7	3	6	7	6	5	6	6	3
2	6	3	6	6	6	2	6	6	3
3	5	4	4	6	3	3	6	6	5
4	6	4	6	6	6	4	4	6	4
1	6	5	6	5	3	2	4	6	3
5	5	5	5	4	5	4	5	4	4
3	6	3	5	5	5	1	5	5	1
2	7	5	1	6	4	5	7	6	4
1	4	2	4	4	4	3	3	6	2
3	6	5	5	5	5	6	5	5	6
6	6	5	5	4	4	6	4	5	6
5	5	3	5	5	4	4	4	5	4
3	6	6	6	6	6	6	6	6	5
2	4	5	5	4	5	4	3	2	3
1	2	1	7	1	1	1	7	7	1
5	4	6	4	5	4	5	5	5	4
2	3	2	5	6	5	3	6	6	3
6	6	4	6	4	4	6	6	6	5
4	6	3	6	6	6	3	6	5	3
5	5	2	6	7	4	3	5	5	4
1	5	2	6	6	6	2	6	5	2
4	5	5	5	5	5	6	5	6	5
6	6	2	6	6	6	3	6	5	3
3	5	6	6	5	4	6	5	6	5
5	6	6	6	6	6	5	5	5	3
3	3	3	3	4	4	4	5	3	5
3	5	3	4	6	4	2	6	6	3
7	5	6	3	3	5	5	3	6	4
4	4	6	4	6	4	7	5	4	4
2	5	3	6	6	6	2	6	5	5
6	6	1	6	6	6	2	6	6	4
2	6	5	4	4	3	5	4	5	5
5	6	2	6	5	6	5	5	6	2
7	2	4	4	6	1	4	5	2	4
6	6	4	5	5	5	3	4	3	2
4	4	4	4	4	4	4	4	4	4
3	3	2	4	4	3	2	5	4	3
3	6	4	6	6	6	3	6	5	4
